# Supplementary material for: Prevalence and impact of molecular variation in the three-prime repair exonuclease 1 TREX1 and its implications for oncology
Source: Hum Genomics. 2025 Jun 28;19:73. doi: 10.1186/s40246-025-00785-y (PMC12206365; doi:10.1186/s40246-025-00785-y)
Supplement: Supplementary file 4 — Additional file 4. Table S1. TREX1 and TREX2 sequences collected using blastp searches of the NCBI RefSeq database using human TREX1b (NP_338599.1) as a query, with addition of human TREX1a isoform from GenPept. [file 40246_2025_785_MOESM4_ESM.xlsx]

## Sheet: Table_S1
Table S1. TREX1 and TREX2 sequences collected using blastp searches of the NCBI RefSeq database using human TREX1b (NP_338599.1) as a query, with addition of human TREX1a isoform from GenPept
The blastp search identified 899 protein hits, which included human TREX1 b and c isoforms, and human TREX2.
The human TREX1 isoform a is a part of the RefSeq collection. It was added manually to the the protein alignment using NCBI GenPept entry ID AAH23630.1.
Five short sequences with length ≤ 130 aa (XP_007456694.1 from Lipotes vexillifer, XP_008510310.1 from Equus przewalskii,
XP_022101031.1 from Acanthaster planci, and XP_033115441.1 and XP_033096606.1, both from Anneissia japonica,
ranging in length from 78 to 130 aa), were not included in the alignment.
Accession	Acc. Len	Description	Scientific Name	Max Score	Total Score	Query Cover	E value	Per. ident	Comment
XP_022101031.1	108	three-prime repair exonuclease 1-like [Acanthaster planci]	Acanthaster planci	50.8	50.8	0.27	0.0002	42.35	Not included in alignment due to length <= 130 aa
XP_022101032.1	494	uncharacterized protein LOC110984809 [Acanthaster planci]	Acanthaster planci	135	246	0.71	4e-32	38.77
XP_026909040.1	236	three prime repair exonuclease 2 [Acinonyx jubatus]	Acinonyx jubatus	150	150	0.7	4e-40	45.58
XP_034776023.1	237	LOW QUALITY PROTEIN: three prime repair exonuclease 2-like [Acipenser ruthenus]	Acipenser ruthenus	151	151	0.7	1e-40	46.46
XP_033863040.1	282	three prime repair exonuclease 2-like [Acipenser ruthenus]	Acipenser ruthenus	142	142	0.71	1e-36	45.61
XP_034766988.1	277	three prime repair exonuclease 2-like isoform X1 [Acipenser ruthenus]	Acipenser ruthenus	104	104	0.71	3e-22	38.2
XP_034766989.1	252	three prime repair exonuclease 2-like isoform X2 [Acipenser ruthenus]	Acipenser ruthenus	104	104	0.71	1e-22	38.2
XP_011053343.1	326	PREDICTED: uncharacterized protein LOC105145485 isoform X1 [Acromyrmex echinatior]	Acromyrmex echinatior	50.4	50.4	0.46	0.003	31.29
XP_015749504.1	169	PREDICTED: three prime repair exonuclease 2-like [Acropora digitifera]	Acropora digitifera	65.5	65.5	0.32	6e-09	33.04
XP_044168884.1	228	three prime repair exonuclease 2-like [Acropora millepora]	Acropora millepora	66.6	66.6	0.64	5e-09	29.05
XP_044168882.1	230	three prime repair exonuclease 2-like [Acropora millepora]	Acropora millepora	59.7	59.7	0.64	1e-06	28.44
XP_029186795.2	289	three prime repair exonuclease 2-like [Acropora millepora]	Acropora millepora	96.3	96.3	0.68	3e-19	32.3
XP_031552736.1	302	three-prime repair exonuclease 1-like [Actinia tenebrosa]	Actinia tenebrosa	123	123	0.65	3e-29	39.82
XP_001647854.2	320	uncharacterized protein LOC5563618 [Aedes aegypti]	Aedes aegypti	77.4	77.4	0.48	3e-12	39.61
XP_029734080.1	220	three prime repair exonuclease 2-like [Aedes albopictus]	Aedes albopictus	93.2	93.2	0.63	1e-18	35.47
XP_029715337.1	221	three prime repair exonuclease 2-like [Aedes albopictus]	Aedes albopictus	96.7	96.7	0.63	6e-20	36.27
XP_029715338.1	221	three prime repair exonuclease 2-like [Aedes albopictus]	Aedes albopictus	96.3	96.3	0.63	9e-20	36.27
XP_029736024.1	292	three prime repair exonuclease 2-like [Aedes albopictus]	Aedes albopictus	77.8	77.8	0.52	1e-12	36.97
XP_019931946.2	325	three-prime repair exonuclease 1-like [Aedes albopictus]	Aedes albopictus	77.8	77.8	0.52	2e-12	36.97
XP_029734460.1	330	three-prime repair exonuclease 1-like [Aedes albopictus]	Aedes albopictus	78.6	78.6	0.52	1e-12	37.58
XP_019875105.1	277	PREDICTED: three prime repair exonuclease 2-like [Aethina tumida]	Aethina tumida	97.8	97.8	0.69	7e-20	27.31
XP_025837013.1	365	uncharacterized protein LOC108735513 [Agrilus planipennis]	Agrilus planipennis	91.3	91.3	0.52	6e-17	38.86
XP_019665328.1	236	three prime repair exonuclease 2 [Ailuropoda melanoleuca]	Ailuropoda melanoleuca	152	152	0.7	5e-41	46.46
XP_002926073.2	314	three-prime repair exonuclease 1 [Ailuropoda melanoleuca]	Ailuropoda melanoleuca	394	394	1	1e-134	81.21
XP_043208023.1	438	uncharacterized protein LOC122373738 isoform X1 [Amphibalanus amphitrite]	Amphibalanus amphitrite	55.5	55.5	0.32	0.0001	45.63
XP_043208026.1	421	uncharacterized protein LOC122373738 isoform X2 [Amphibalanus amphitrite]	Amphibalanus amphitrite	55.5	55.5	0.32	0.0001	45.63
XP_043242789.1	437	uncharacterized protein LOC122392224 [Amphibalanus amphitrite]	Amphibalanus amphitrite	55.5	55.5	0.37	0.0001	41.6
XP_013199216.1	274	PREDICTED: three-prime repair exonuclease 1-like [Amyelois transitella]	Amyelois transitella	84	84	0.7	8e-15	24.82
XP_013194422.1	370	PREDICTED: three-prime repair exonuclease 1-like [Amyelois transitella]	Amyelois transitella	72	125	0.61	3e-10	38.17
XP_033096606.1	130	three prime repair exonuclease 2-like [Anneissia japonica]	Anneissia japonica	85.5	85.5	0.35	1e-16	39.13	Not included in alignment due to length <= 130 aa
XP_033122286.1	153	three prime repair exonuclease 2-like [Anneissia japonica]	Anneissia japonica	99.4	99.4	0.49	1e-21	40.26
XP_033109561.1	161	three prime repair exonuclease 2-like [Anneissia japonica]	Anneissia japonica	90.5	90.5	0.37	3e-18	38.66
XP_033117156.1	174	three prime repair exonuclease 2-like [Anneissia japonica]	Anneissia japonica	121	121	0.54	1e-29	41.18
XP_033124319.1	189	three prime repair exonuclease 2-like [Anneissia japonica]	Anneissia japonica	117	117	0.54	7e-28	40
XP_033100763.1	207	three prime repair exonuclease 2-like [Anneissia japonica]	Anneissia japonica	127	127	0.65	8e-32	39.61
XP_033105102.1	211	three prime repair exonuclease 2-like [Anneissia japonica]	Anneissia japonica	122	122	0.65	7e-30	38.76
XP_033097636.1	230	three prime repair exonuclease 2-like [Anneissia japonica]	Anneissia japonica	150	150	0.71	2e-40	40.62
XP_033113552.1	238	three prime repair exonuclease 2-like [Anneissia japonica]	Anneissia japonica	152	152	0.71	6e-41	41.52
XP_033110434.1	245	three prime repair exonuclease 2-like [Anneissia japonica]	Anneissia japonica	146	146	0.71	2e-38	39.29
XP_033096023.1	347	three prime repair exonuclease 2-like [Anneissia japonica]	Anneissia japonica	137	137	0.71	3e-34	34.21
XP_033115441.1	116	three-prime repair exonuclease 1-like [Anneissia japonica]	Anneissia japonica	63.5	63.5	0.28	8e-09	40.45	Not included in alignment due to length <= 130 aa
XP_003216926.1	227	PREDICTED: three prime repair exonuclease 2 [Anolis carolinensis]	Anolis carolinensis	158	158	0.71	3e-43	42.92
XP_008103376.1	329	PREDICTED: three-prime repair exonuclease 1 [Anolis carolinensis]	Anolis carolinensis	190	190	0.72	2e-54	45.53
XP_035785377.1	379	uncharacterized protein LOC118463127 [Anopheles albimanus]	Anopheles albimanus	82	82	0.48	1e-13	39.1
XP_040162576.1	339	uncharacterized protein LOC120900078 [Anopheles arabiensis]	Anopheles arabiensis	72.4	72.4	0.48	2e-10	38.22
XP_040225302.1	339	uncharacterized protein LOC120950942 [Anopheles coluzzii]	Anopheles coluzzii	74.3	74.3	0.48	4e-11	38.85
XP_049290463.1	334	uncharacterized protein LOC125767680 [Anopheles funestus]	Anopheles funestus	80.1	80.1	0.48	4e-13	36.54
XP_557337.3	339	AGAP006662-PA [Anopheles gambiae str. PEST]	Anopheles gambiae str. PEST	74.3	74.3	0.48	4e-11	38.85
XP_041772340.1	339	uncharacterized protein LOC121593757 [Anopheles merus]	Anopheles merus	72.4	72.4	0.48	2e-10	38.22
XP_035916871.1	336	LOW QUALITY PROTEIN: uncharacterized protein LOC118514262 [Anopheles stephensi]	Anopheles stephensi	76.3	76.3	0.49	8e-12	36.31
XP_018574679.1	303	three-prime repair exonuclease 1 isoform X2 [Anoplophora glabripennis]	Anoplophora glabripennis	81.6	81.6	0.48	8e-14	32.9
XP_018574678.1	314	uncharacterized protein LOC108913597 isoform X1 [Anoplophora glabripennis]	Anoplophora glabripennis	81.6	131	0.7	8e-14	32.9
YP_611004.1	230	v-trex [Antheraea pernyi nucleopolyhedrovirus]	Antheraea pernyi nucleopolyhedrovirus	77.8	77.8	0.7	6e-13	30.74
YP_009316054.1	230	EXO III v-trex [Anticarsia gemmatalis multiple nucleopolyhedrovirus]	Anticarsia gemmatalis multiple nucleopolyhedrovirus	81.3	81.3	0.7	4e-14	31.15
YP_803516.1	230	EXO III v-trex [Anticarsia gemmatalis nucleopolyhedrovirus]	Anticarsia gemmatalis nucleopolyhedrovirus	80.5	80.5	0.7	8e-14	31.15
XP_012293309.1	236	three prime repair exonuclease 2 [Aotus nancymaae]	Aotus nancymaae	147	147	0.7	4e-39	46.02
XP_012323071.1	314	three-prime repair exonuclease 1 [Aotus nancymaae]	Aotus nancymaae	443	443	1	5e-154	92.68
XP_016913398.1	321	uncharacterized protein LOC107998572 [Apis cerana]	Apis cerana	63.9	63.9	0.47	1e-07	35.53
XP_031370532.1	319	uncharacterized protein LOC102673353 [Apis dorsata]	Apis dorsata	63.9	63.9	0.42	1e-07	38.06
XP_003692367.2	332	uncharacterized protein MAL13P1.304 [Apis florea]	Apis florea	62.4	62.4	0.53	4e-07	31.61
XP_043784563.1	319	uncharacterized protein LOC122710650 [Apis laboriosa]	Apis laboriosa	62.8	62.8	0.42	2e-07	38.06
XP_006557487.1	241	three prime repair exonuclease 2 isoform X2 [Apis mellifera]	Apis mellifera	82.8	82.8	0.68	1e-14	29.8
XP_016770519.1	202	three prime repair exonuclease 2 isoform X3 [Apis mellifera]	Apis mellifera	86.7	86.7	0.68	2e-16	32.72
XP_016770518.1	321	uncharacterized protein LOC100577651 isoform X1 [Apis mellifera]	Apis mellifera	64.3	64.3	0.47	7e-08	36.18
XP_035824810.1	294	three prime repair exonuclease 2 [Aplysia californica]	Aplysia californica	71.6	71.6	0.58	2e-10	32.79
XP_005098868.2	217	three-prime repair exonuclease 1 [Aplysia californica]	Aplysia californica	118	118	0.73	3e-28	35.34
XP_012938245.1	457	uncharacterized protein LOC101851949 [Aplysia californica]	Aplysia californica	72	134	0.71	3e-10	34.57
XP_012941377.1	445	uncharacterized protein LOC106012576 [Aplysia californica]	Aplysia californica	83.2	131	0.67	6e-14	40
XP_013800735.1	219	PREDICTED: LOW QUALITY PROTEIN: three-prime repair exonuclease 1 [Apteryx mantelli mantelli]	Apteryx mantelli mantelli	75.5	75.5	0.53	4e-12	35.67
XP_041968133.1	276	three-prime repair exonuclease 1-like [Aricia agestis]	Aricia agestis	76.3	76.3	0.5	4e-12	33.74
XP_041985263.1	289	uncharacterized protein LOC121737665 [Aricia agestis]	Aricia agestis	75.9	75.9	0.7	7e-12	24.83
XP_037006430.1	236	three prime repair exonuclease 2 [Artibeus jamaicensis]	Artibeus jamaicensis	146	146	0.71	1e-38	44.2
XP_036984293.1	314	three-prime repair exonuclease 1 [Artibeus jamaicensis]	Artibeus jamaicensis	383	383	1	2e-130	80.25
XP_034341536.1	236	three prime repair exonuclease 2 [Arvicanthis niloticus]	Arvicanthis niloticus	148	148	0.7	2e-39	44.25
XP_034380941.1	345	three-prime repair exonuclease 1 [Arvicanthis niloticus]	Arvicanthis niloticus	343	343	1	3e-114	72.38
XP_038171593.1	236	three prime repair exonuclease 2 [Arvicola amphibius]	Arvicola amphibius	152	152	0.7	9e-41	46.46
XP_038178559.1	313	three-prime repair exonuclease 1 [Arvicola amphibius]	Arvicola amphibius	367	367	1	6e-124	76.83
XP_033643355.1	599	uncharacterized protein LOC117303298 [Asterias rubens]	Asterias rubens	144	256	0.76	3e-35	39.34
XP_048515619.1	349	three-prime repair exonuclease 1 isoform X1 [Athalia rosae]	Athalia rosae	69.7	69.7	0.6	2e-09	28.84
XP_012268175.2	325	three-prime repair exonuclease 1 isoform X2 [Athalia rosae]	Athalia rosae	81.6	81.6	0.6	9e-14	32.29
XP_048515621.1	296	three-prime repair exonuclease 1 isoform X4 [Athalia rosae]	Athalia rosae	80.1	80.1	0.52	2e-13	33.93
XP_048515620.1	320	uncharacterized protein LOC105693072 isoform X3 [Athalia rosae]	Athalia rosae	67.8	67.8	0.52	5e-09	29.84
XP_012062880.1	258	PREDICTED: three prime repair exonuclease 2 [Atta cephalotes]	Atta cephalotes	50.8	50.8	0.46	0.002	31.29
XP_018045432.1	325	PREDICTED: uncharacterized protein LOC108685250 [Atta colombica]	Atta colombica	50.8	50.8	0.46	0.002	31.29
XP_011199808.2	238	LOW QUALITY PROTEIN: three-prime repair exonuclease 1 [Bactrocera dorsalis]	Bactrocera dorsalis	68.9	68.9	0.51	1e-09	30.77
XP_011199806.2	530	uncharacterized protein LOC105223716 [Bactrocera dorsalis]	Bactrocera dorsalis	74.3	74.3	0.53	6e-11	34.46
XP_018783331.1	237	PREDICTED: three prime repair exonuclease 2-like [Bactrocera latifrons]	Bactrocera latifrons	69.3	69.3	0.51	7e-10	25.73
XP_018783294.1	331	PREDICTED: uncharacterized protein LOC108965389 [Bactrocera latifrons]	Bactrocera latifrons	74.7	74.7	0.5	3e-11	35.76
XP_014090369.2	334	DNA polymerase III PolC-type [Bactrocera oleae]	Bactrocera oleae	65.9	65.9	0.5	3e-08	32.93
XP_039950672.1	237	three-prime repair exonuclease 1-like [Bactrocera tryoni]	Bactrocera tryoni	67.4	67.4	0.51	4e-09	26.32
XP_039951484.1	660	uncharacterized protein LOC120768795 [Bactrocera tryoni]	Bactrocera tryoni	73.6	73.6	0.5	2e-10	34.13
XP_007168869.1	314	three-prime repair exonuclease 1 [Balaenoptera acutorostrata scammoni]	Balaenoptera acutorostrata scammoni	417	417	1	1e-143	84.08
XP_036695987.1	218	LOW QUALITY PROTEIN: three prime repair exonuclease 2 [Balaenoptera musculus]	Balaenoptera musculus	110	110	0.7	4e-25	38.05
XP_036723894.1	314	three-prime repair exonuclease 1 [Balaenoptera musculus]	Balaenoptera musculus	416	416	1	2e-143	83.76
XP_033222274.1	352	uncharacterized protein LOC117176237 [Belonocnema kinseyi]	Belonocnema kinseyi	49.7	49.7	0.4	0.007	27.27
XP_018908545.1	430	PREDICTED: uncharacterized protein LOC109038063 [Bemisia tabaci]	Bemisia tabaci	72	72	0.39	4e-10	35.2
XP_023934339.1	271	three prime repair exonuclease 2-like [Bicyclus anynana]	Bicyclus anynana	82.4	82.4	0.48	3e-14	33.33
XP_023934303.1	300	uncharacterized protein LOC112043222 [Bicyclus anynana]	Bicyclus anynana	67.4	67.4	0.47	7e-09	32.24
XP_013064318.1	362	PREDICTED: three-prime repair exonuclease 1-like [Biomphalaria glabrata]	Biomphalaria glabrata	82.8	139	0.67	5e-14	39.35
XP_010850211.1	315	PREDICTED: three-prime repair exonuclease 1 [Bison bison bison]	Bison bison bison	354	354	1	7e-119	76.19
XP_033308602.1	244	three-prime repair exonuclease 1 isoform X2 [Bombus bifarius]	Bombus bifarius	80.1	80.1	0.68	1e-13	28.23
XP_033308601.1	326	uncharacterized protein LOC117210080 isoform X1 [Bombus bifarius]	Bombus bifarius	57.8	57.8	0.53	1e-05	30.41
XP_012241040.1	244	three-prime repair exonuclease 1 isoform X2 [Bombus impatiens]	Bombus impatiens	78.2	78.2	0.68	7e-13	27.78
XP_012241039.1	326	uncharacterized protein LOC100743466 isoform X1 [Bombus impatiens]	Bombus impatiens	56.2	56.2	0.41	5e-05	34.59
XP_043586844.1	244	three-prime repair exonuclease 1 isoform X3 [Bombus pyrosoma]	Bombus pyrosoma	82.8	82.8	0.68	1e-14	28.23
XP_043586846.1	201	three-prime repair exonuclease 1 isoform X4 [Bombus pyrosoma]	Bombus pyrosoma	85.1	85.1	0.68	8e-16	31.19
XP_043586838.1	326	uncharacterized protein LOC122569615 isoform X1 [Bombus pyrosoma]	Bombus pyrosoma	58.9	58.9	0.41	6e-06	35.34
XP_043586843.1	299	uncharacterized protein LOC122569615 isoform X2 [Bombus pyrosoma]	Bombus pyrosoma	59.3	59.3	0.41	4e-06	35.34
XP_012166119.1	244	three prime repair exonuclease 2 isoform X2 [Bombus terrestris]	Bombus terrestris	83.6	83.6	0.68	7e-15	28.23
XP_003396954.1	326	uncharacterized protein LOC100642728 isoform X1 [Bombus terrestris]	Bombus terrestris	57	105	0.56	3e-05	34.62
XP_033195071.1	244	three-prime repair exonuclease 1 [Bombus vancouverensis nearcticus]	Bombus vancouverensis nearcticus	79.3	79.3	0.68	3e-13	27.31
XP_033364354.1	244	three-prime repair exonuclease 1 isoform X2 [Bombus vosnesenskii]	Bombus vosnesenskii	80.1	80.1	0.68	1e-13	28.23
XP_033364353.1	326	uncharacterized protein LOC117242088 isoform X1 [Bombus vosnesenskii]	Bombus vosnesenskii	57.8	57.8	0.53	1e-05	30.41
XP_028041297.1	278	three prime repair exonuclease 2-like isoform X1 [Bombyx mandarina]	Bombyx mandarina	79.7	79.7	0.7	2e-13	26.16
XP_028027588.1	300	uncharacterized protein LOC114241067 [Bombyx mandarina]	Bombyx mandarina	71.2	71.2	0.5	3e-10	33.54
XP_004926946.1	278	three prime repair exonuclease 2 isoform X1 [Bombyx mori]	Bombyx mori	79.7	79.7	0.7	3e-13	24.55
XP_004923125.1	300	uncharacterized protein LOC101738032 [Bombyx mori]	Bombyx mori	71.6	71.6	0.5	3e-10	33.54
XP_019840380.1	315	PREDICTED: three-prime repair exonuclease 1 [Bos indicus]	Bos indicus	354	354	1	7e-119	76.19
XP_027391245.1	224	three prime repair exonuclease 2 [Bos indicus x Bos taurus]	Bos indicus x Bos taurus	93.2	93.2	0.49	1e-18	44.87
XP_005911089.1	189	PREDICTED: three prime repair exonuclease 2 [Bos mutus]	Bos mutus	96.7	96.7	0.49	3e-20	45.51
XP_005909403.1	315	PREDICTED: three-prime repair exonuclease 1 [Bos mutus]	Bos mutus	348	348	1	8e-117	76.19
XP_010819903.1	207	three prime repair exonuclease 2 [Bos taurus]	Bos taurus	92.4	92.4	0.49	2e-18	44.87
NP_776900.2	315	three-prime repair exonuclease 1 [Bos taurus]	Bos taurus	356	356	1	1e-119	76.51
XP_037030865.1	355	uncharacterized protein LOC119070562 [Bradysia coprophila]	Bradysia coprophila	92.8	92.8	0.47	2e-17	40.4
XP_019646293.1	233	PREDICTED: three prime repair exonuclease 2-like [Branchiostoma belcheri]	Branchiostoma belcheri	118	118	0.7	4e-28	37.05
XP_019625599.1	459	PREDICTED: uncharacterized protein LOC109470945 [Branchiostoma belcheri]	Branchiostoma belcheri	123	223	0.71	5e-28	39.3
XP_035682623.1	249	three prime repair exonuclease 2-like [Branchiostoma floridae]	Branchiostoma floridae	127	127	0.72	3e-31	39.39
XP_035695625.1	231	three-prime repair exonuclease 1-like [Branchiostoma floridae]	Branchiostoma floridae	111	111	0.7	3e-25	37.55
XP_035694501.1	241	three-prime repair exonuclease 1-like [Branchiostoma floridae]	Branchiostoma floridae	133	133	0.71	1e-33	40.17
XP_006043764.2	239	three prime repair exonuclease 2 [Bubalus bubalis]	Bubalus bubalis	152	152	0.73	5e-41	44.49
XP_006065231.2	315	three-prime repair exonuclease 1 [Bubalus bubalis]	Bubalus bubalis	378	378	1	2e-128	76.19
XP_040261259.1	219	three prime repair exonuclease 2 [Bufo bufo]	Bufo bufo	134	134	0.7	3e-34	42.04
XP_044162092.1	219	three prime repair exonuclease 2 [Bufo gargarizans]	Bufo gargarizans	134	134	0.7	3e-34	42.67
XP_035143897.1	236	three prime repair exonuclease 2 [Callithrix jacchus]	Callithrix jacchus	148	148	0.71	2e-39	45.18
XP_008979843.1	314	three-prime repair exonuclease 1 [Callithrix jacchus]	Callithrix jacchus	440	440	1	6e-153	92.04
XP_025718595.1	301	three prime repair exonuclease 2 [Callorhinus ursinus]	Callorhinus ursinus	151	151	0.7	1e-39	47.35
XP_025740584.1	314	three-prime repair exonuclease 1 [Callorhinus ursinus]	Callorhinus ursinus	405	405	1	3e-139	81.53
XP_010962411.1	236	three prime repair exonuclease 2 [Camelus bactrianus]	Camelus bactrianus	146	146	0.7	1e-38	45.13
XP_010967533.1	261	three-prime repair exonuclease 1 isoform X2 [Camelus bactrianus]	Camelus bactrianus	324	324	0.8	7e-108	80.95
XP_031302150.1	236	three prime repair exonuclease 2 [Camelus dromedarius]	Camelus dromedarius	146	146	0.7	1e-38	45.13
XP_010977039.1	316	three-prime repair exonuclease 1 isoform X1 [Camelus dromedarius]	Camelus dromedarius	400	400	0.99	3e-137	82.43
XP_010977045.1	261	three-prime repair exonuclease 1 isoform X2 [Camelus dromedarius]	Camelus dromedarius	324	324	0.8	8e-108	80.95
XP_006174247.2	316	three-prime repair exonuclease 1 isoform X1 [Camelus ferus]	Camelus ferus	400	400	0.99	4e-137	82.43
XP_025262553.1	324	uncharacterized protein LOC105253675 isoform X1 [Camponotus floridanus]	Camponotus floridanus	62.4	62.4	0.48	3e-07	31.61
XP_005642046.1	236	three prime repair exonuclease 2 [Canis lupus familiaris]	Canis lupus familiaris	151	151	0.7	1e-40	46.9
XP_005632646.1	373	three-prime repair exonuclease 1 isoform X1 [Canis lupus familiaris]	Canis lupus familiaris	394	394	1	5e-134	82.17
XP_013977676.1	339	three-prime repair exonuclease 1 isoform X2 [Canis lupus familiaris]	Canis lupus familiaris	396	396	1	4e-135	82.17
XP_017922514.1	315	PREDICTED: three-prime repair exonuclease 1 [Capra hircus]	Capra hircus	360	360	1	3e-121	78.41
XP_048688892.1	225	three prime repair exonuclease 2 [Caretta caretta]	Caretta caretta	149	149	0.72	7e-40	42.11
XP_008056448.1	373	LOW QUALITY PROTEIN: three-prime repair exonuclease 1 [Carlito syrichta]	Carlito syrichta	413	413	1	3e-141	85.35
XP_008047843.1	236	three prime repair exonuclease 2 [Carlito syrichta]	Carlito syrichta	149	149	0.7	9e-40	45.58
XP_020035314.1	310	three prime repair exonuclease 2 [Castor canadensis]	Castor canadensis	150	150	0.7	2e-39	46.02
XP_020033284.1	307	three-prime repair exonuclease 1 [Castor canadensis]	Castor canadensis	377	377	0.98	6e-128	82.2
XP_013015215.1	1089	ATR-interacting protein isoform X1 [Cavia porcellus]	Cavia porcellus	385	385	1	4e-122	79.3
XP_005000117.1	236	three prime repair exonuclease 2 [Cavia porcellus]	Cavia porcellus	153	153	0.7	2e-41	46.46
XP_005006676.1	314	three-prime repair exonuclease 1 isoform X3 [Cavia porcellus]	Cavia porcellus	385	385	1	3e-131	79.3
XP_017370496.2	374	three-prime repair exonuclease 1 [Cebus imitator]	Cebus imitator	427	427	1	4e-147	90.76
XP_023209931.1	349	three-prime repair exonuclease 1-like [Centruroides sculpturatus]	Centruroides sculpturatus	74.7	132	0.71	3e-11	35.44
XP_023209929.1	351	three-prime repair exonuclease 1-like [Centruroides sculpturatus]	Centruroides sculpturatus	78.6	134	0.7	1e-12	36.25
XP_023233640.1	404	three-prime repair exonuclease 1-like [Centruroides sculpturatus]	Centruroides sculpturatus	127	127	0.71	5e-30	34.35
XP_023224936.1	321	three-prime repair exonuclease 1-like isoform X1 [Centruroides sculpturatus]	Centruroides sculpturatus	79	135	0.69	8e-13	37.11
XP_023224941.1	268	three-prime repair exonuclease 1-like isoform X2 [Centruroides sculpturatus]	Centruroides sculpturatus	78.6	78.6	0.48	6e-13	36.88
XP_015590940.1	251	uncharacterized protein LOC107265719 [Cephus cinctus]	Cephus cinctus	48.5	48.5	0.3	0.01	31.63
XP_017885267.1	303	three prime repair exonuclease 2 isoform X3 [Ceratina calcarata]	Ceratina calcarata	67.4	67.4	0.46	6e-09	35.14
XP_017885261.1	334	uncharacterized protein LOC108628085 isoform X1 [Ceratina calcarata]	Ceratina calcarata	67	67	0.46	1e-08	35.14
XP_017885262.1	308	uncharacterized protein LOC108628085 isoform X2 [Ceratina calcarata]	Ceratina calcarata	66.2	66.2	0.43	2e-08	36.43
XP_004533927.1	329	uncharacterized protein LOC101450867 [Ceratitis capitata]	Ceratitis capitata	69.3	69.3	0.51	2e-09	35.63
XP_004443345.1	236	PREDICTED: three prime repair exonuclease 2 [Ceratotherium simum simum]	Ceratotherium simum simum	139	139	0.7	7e-36	43.95
XP_014647155.1	314	PREDICTED: three-prime repair exonuclease 1 [Ceratotherium simum simum]	Ceratotherium simum simum	417	417	1	7e-144	84.39
XP_011890680.1	275	PREDICTED: three prime repair exonuclease 2 isoform X1 [Cercocebus atys]	Cercocebus atys	152	152	0.7	1e-40	46.46
XP_011890681.1	264	PREDICTED: three prime repair exonuclease 2 isoform X2 [Cercocebus atys]	Cercocebus atys	152	152	0.7	1e-40	46.46
XP_011890683.1	236	PREDICTED: three prime repair exonuclease 2 isoform X3 [Cercocebus atys]	Cercocebus atys	152	152	0.7	6e-41	46.46
XP_011888942.1	314	PREDICTED: three-prime repair exonuclease 1 [Cercocebus atys]	Cercocebus atys	454	454	1	3e-158	95.54
XP_043313532.1	236	three prime repair exonuclease 2 [Cervus canadensis]	Cervus canadensis	150	150	0.7	4e-40	46.02
XP_043298324.1	362	three-prime repair exonuclease 1 [Cervus canadensis]	Cervus canadensis	364	364	1	2e-122	79.05
XP_043741794.1	362	LOW QUALITY PROTEIN: three-prime repair exonuclease 1 [Cervus elaphus]	Cervus elaphus	366	366	1	4e-123	79.37
XP_043751180.1	236	three prime repair exonuclease 2 [Cervus elaphus]	Cervus elaphus	150	150	0.7	4e-40	46.02
XP_037744325.1	227	three prime repair exonuclease 2 isoform X1 [Chelonia mydas]	Chelonia mydas	148	148	0.72	1e-39	41.67
XP_037744326.1	225	three prime repair exonuclease 2 isoform X2 [Chelonia mydas]	Chelonia mydas	148	148	0.72	1e-39	41.67
XP_032654399.1	225	three prime repair exonuclease 2 [Chelonoidis abingdonii]	Chelonoidis abingdonii	129	129	0.72	3e-32	40.79
XP_005414176.1	236	PREDICTED: three prime repair exonuclease 2 [Chinchilla lanigera]	Chinchilla lanigera	155	155	0.71	6e-42	46.49
XP_005410208.2	445	PREDICTED: three-prime repair exonuclease 1 [Chinchilla lanigera]	Chinchilla lanigera	379	379	1	8e-127	78.66
XP_007991244.2	236	three prime repair exonuclease 2 [Chlorocebus sabaeus]	Chlorocebus sabaeus	149	149	0.7	8e-40	46.02
XP_007982312.1	314	three-prime repair exonuclease 1 [Chlorocebus sabaeus]	Chlorocebus sabaeus	455	455	1	6e-159	95.54
XP_037677801.1	236	three prime repair exonuclease 2 [Choloepus didactylus]	Choloepus didactylus	145	145	0.71	2e-38	44.64
XP_037706180.1	314	three-prime repair exonuclease 1 [Choloepus didactylus]	Choloepus didactylus	398	398	1	2e-136	83.44
NP_932728.2	230	hypothetical protein CFDNVgORF119 [Choristoneura fumiferana DEF multiple nucleopolyhedrovirus]	Choristoneura fumiferana DEF multiple nucleopolyhedrovirus	73.2	73.2	0.7	3e-11	30.33
NP_848425.1	232	unknown [Choristoneura fumiferana multiple nucleopolyhedrovirus]	Choristoneura fumiferana multiple nucleopolyhedrovirus	70.1	70.1	0.71	4e-10	29.76
XP_005282427.2	223	three prime repair exonuclease 2 [Chrysemys picta bellii]	Chrysemys picta bellii	143	143	0.72	9e-38	40.79
XP_006873698.1	308	PREDICTED: three prime repair exonuclease 1 [Chrysochloris asiatica]	Chrysochloris asiatica	360	360	1	1e-121	72.29
XP_006877235.1	235	PREDICTED: three prime repair exonuclease 2 [Chrysochloris asiatica]	Chrysochloris asiatica	151	151	0.7	1e-40	46.22
XP_044732649.1	312	uncharacterized protein LOC123295380 [Chrysoperla carnea]	Chrysoperla carnea	82	82	0.48	6e-14	35.71
XP_044733344.1	287	uncharacterized protein LOC123295947 [Chrysoperla carnea]	Chrysoperla carnea	82.4	82.4	0.48	3e-14	36.36
XP_014241279.1	326	three-prime repair exonuclease 1 [Cimex lectularius]	Cimex lectularius	83.6	83.6	0.62	2e-14	31.53
XP_009860559.1	440	uncharacterized protein LOC104266336 [Ciona intestinalis]	Ciona intestinalis	103	103	0.67	6e-21	34.09
XP_018667031.1	477	uncharacterized protein LOC108949427 [Ciona intestinalis]	Ciona intestinalis	113	167	0.68	3e-24	36.7
XP_044759093.1	326	uncharacterized protein LOC123316883 isoform X1 [Coccinella septempunctata]	Coccinella septempunctata	80.1	80.1	0.51	4e-13	34.13
XP_044759101.1	322	uncharacterized protein LOC123316883 isoform X2 [Coccinella septempunctata]	Coccinella septempunctata	80.1	80.1	0.51	3e-13	34.13
XP_045505176.1	288	three-prime repair exonuclease 1-like [Colias croceus]	Colias croceus	83.6	83.6	0.7	1e-14	27.02
XP_045505318.1	286	three-prime repair exonuclease 1-like isoform X1 [Colias croceus]	Colias croceus	71.6	71.6	0.48	2e-10	33.97
XP_045505319.1	282	three-prime repair exonuclease 1-like isoform X2 [Colias croceus]	Colias croceus	71.2	71.2	0.48	2e-10	33.97
XP_043256800.1	316	uncharacterized protein LOC122399850 [Colletes gigas]	Colletes gigas	61.6	61.6	0.47	7e-07	32.68
XP_011811233.1	264	PREDICTED: three prime repair exonuclease 2 [Colobus angolensis palliatus]	Colobus angolensis palliatus	155	155	0.7	6e-42	46.9
XP_011794555.1	339	PREDICTED: three-prime repair exonuclease 1 isoform X1 [Colobus angolensis palliatus]	Colobus angolensis palliatus	398	398	0.91	5e-136	95.47
XP_011794556.1	314	PREDICTED: three-prime repair exonuclease 1 isoform X2 [Colobus angolensis palliatus]	Colobus angolensis palliatus	454	454	1	1e-158	95.86
XP_011794557.1	304	PREDICTED: three-prime repair exonuclease 1 isoform X3 [Colobus angolensis palliatus]	Colobus angolensis palliatus	435	435	0.96	4e-151	95.72
YP_009118513.1	230	EXO III v-trex [Condylorrhiza vestigialis MNPV]	Condylorrhiza vestigialis MNPV	76.3	76.3	0.7	3e-12	29.1
XP_004695264.1	236	PREDICTED: three prime repair exonuclease 2 [Condylura cristata]	Condylura cristata	153	153	0.7	3e-41	46.02
XP_004676264.1	314	PREDICTED: three-prime repair exonuclease 1 [Condylura cristata]	Condylura cristata	394	394	0.99	8e-135	79.62
XP_031635172.1	160	three prime repair exonuclease 2-like [Contarinia nasturtii]	Contarinia nasturtii	50.1	50.1	0.41	0.001	32.82
XP_031619749.1	285	three prime repair exonuclease 2-like [Contarinia nasturtii]	Contarinia nasturtii	70.5	70.5	0.5	5e-10	31.45
XP_014207458.1	393	uncharacterized protein LOC106638677 [Copidosoma floridanum]	Copidosoma floridanum	67.4	67.4	0.48	1e-08	33.12
XP_034302786.1	358	three-prime repair exonuclease 1-like isoform X1 [Crassostrea gigas]	Crassostrea gigas	49.7	49.7	0.35	0.006	31.58
XP_034303481.1	554	uncharacterized protein LOC105343831 [Crassostrea gigas]	Crassostrea gigas	95.9	151	0.69	5e-18	43.12
XP_022326528.1	546	uncharacterized protein LOC111126298 [Crassostrea virginica]	Crassostrea virginica	79.7	135	0.69	1e-12	36.81
XP_003506589.1	236	three prime repair exonuclease 2 [Cricetulus griseus]	Cricetulus griseus	149	149	0.7	8e-40	44.69
XP_003504288.2	343	three-prime repair exonuclease 1 isoform X1 [Cricetulus griseus]	Cricetulus griseus	360	360	1	6e-121	76.19
XP_035299874.1	305	three-prime repair exonuclease 1 isoform X2 [Cricetulus griseus]	Cricetulus griseus	276	276	1	2e-88	67.2
XP_039206595.1	223	three prime repair exonuclease 2 [Crotalus tigris]	Crotalus tigris	138	138	0.7	1e-35	40.27
XP_023725400.1	453	uncharacterized protein LOC111874269 [Cryptotermes secundus]	Cryptotermes secundus	78.6	78.6	0.54	2e-12	33.92
XP_026482777.1	335	LOW QUALITY PROTEIN: three-prime repair exonuclease 1-like [Ctenocephalides felis]	Ctenocephalides felis	87.8	140	0.68	8e-16	36.25
XP_026481749.1	335	three-prime repair exonuclease 1-like [Ctenocephalides felis]	Ctenocephalides felis	92	145	0.68	2e-17	36.88
XP_039450796.1	325	three prime repair exonuclease 2 [Culex pipiens pallens]	Culex pipiens pallens	85.5	85.5	0.5	4e-15	37.27
XP_039445333.1	208	three-prime repair exonuclease 1-like [Culex pipiens pallens]	Culex pipiens pallens	71.2	71.2	0.68	1e-10	31.02
XP_001845768.2	325	LOW QUALITY PROTEIN: three prime repair exonuclease 2 [Culex quinquefasciatus]	Culex quinquefasciatus	85.5	85.5	0.5	5e-15	37.27
XP_038111103.1	208	three prime repair exonuclease 2-like [Culex quinquefasciatus]	Culex quinquefasciatus	69.3	69.3	0.63	5e-10	30.69
XP_018406870.1	320	PREDICTED: uncharacterized protein LOC108782965 [Cyphomyrmex costatus]	Cyphomyrmex costatus	58.9	58.9	0.46	5e-06	30.67
XP_032524049.1	264	three-prime repair exonuclease 1-like [Danaus plexippus plexippus]	Danaus plexippus plexippus	93.6	93.6	0.7	2e-18	26.91
XP_032524926.1	352	uncharacterized protein LOC116775965 [Danaus plexippus plexippus]	Danaus plexippus plexippus	47.4	47.4	0.47	0.036	26.97
XP_032782453.2	214	LOW QUALITY PROTEIN: three-prime repair exonuclease 1 [Daphnia magna]	Daphnia magna	116	116	0.68	2e-27	32.88
XP_032780353.1	243	three prime repair exonuclease 2 isoform X1 [Daphnia magna]	Daphnia magna	100	100	0.67	4e-21	31.22
XP_032780355.1	212	three prime repair exonuclease 2 isoform X2 [Daphnia magna]	Daphnia magna	88.6	88.6	0.64	5e-17	30.66
XP_032782017.2	278	three-prime repair exonuclease 1 [Daphnia magna]	Daphnia magna	110	110	0.69	2e-24	30.97
XP_045028115.1	278	three-prime repair exonuclease 1-like [Daphnia magna]	Daphnia magna	109	109	0.69	3e-24	30.97
XP_046459870.1	292	three prime repair exonuclease 2-like [Daphnia pulex]	Daphnia pulex	84	84	0.71	1e-14	30.09
XP_046459873.1	219	three-prime repair exonuclease 1-like [Daphnia pulex]	Daphnia pulex	124	124	0.71	2e-30	36.16
XP_046437831.1	229	three-prime repair exonuclease 1-like [Daphnia pulex]	Daphnia pulex	112	112	0.72	2e-25	33.33
XP_046458144.1	274	three-prime repair exonuclease 1-like [Daphnia pulex]	Daphnia pulex	104	104	0.71	3e-22	30.18
XP_046647706.1	158	three-prime repair exonuclease 1-like [Daphnia pulicaria]	Daphnia pulicaria	74.7	74.7	0.51	2e-12	33.95
XP_046647197.1	220	three-prime repair exonuclease 1-like [Daphnia pulicaria]	Daphnia pulicaria	122	122	0.71	1e-29	36
XP_046645443.1	274	three-prime repair exonuclease 1-like [Daphnia pulicaria]	Daphnia pulicaria	104	104	0.71	2e-22	30.18
XP_004482634.1	236	three prime repair exonuclease 2 [Dasypus novemcinctus]	Dasypus novemcinctus	154	154	0.71	9e-42	46.43
XP_004452010.1	314	three-prime repair exonuclease 1 [Dasypus novemcinctus]	Dasypus novemcinctus	376	376	1	9e-128	82.8
XP_030616857.1	218	LOW QUALITY PROTEIN: three prime repair exonuclease 2 [Delphinapterus leucas]	Delphinapterus leucas	113	113	0.7	3e-26	39.38
XP_022428974.1	314	three-prime repair exonuclease 1 [Delphinapterus leucas]	Delphinapterus leucas	409	409	1	1e-140	83.12
XP_019761898.1	326	uncharacterized protein LOC109538902 [Dendroctonus ponderosae]	Dendroctonus ponderosae	86.7	86.7	0.49	2e-15	37.74
XP_037560156.1	179	three prime repair exonuclease 2-like [Dermacentor silvarum]	Dermacentor silvarum	67.8	67.8	0.51	1e-09	34.91
XP_037561064.1	337	three-prime repair exonuclease 1-like [Dermacentor silvarum]	Dermacentor silvarum	88.2	88.2	0.68	5e-16	29.36
XP_037560144.1	311	three-prime repair exonuclease 1-like isoform X1 [Dermacentor silvarum]	Dermacentor silvarum	105	105	0.71	1e-22	30.54
XP_037560145.1	310	three-prime repair exonuclease 1-like isoform X2 [Dermacentor silvarum]	Dermacentor silvarum	105	105	0.71	1e-22	30.54
XP_037560148.1	338	uncharacterized protein LOC119437149 [Dermacentor silvarum]	Dermacentor silvarum	61.6	61.6	0.44	7e-07	35.71
XP_038237292.1	225	three prime repair exonuclease 2 [Dermochelys coriacea]	Dermochelys coriacea	150	150	0.72	3e-40	42.11
XP_024406838.1	236	three prime repair exonuclease 2 [Desmodus rotundus]	Desmodus rotundus	147	147	0.7	6e-39	44.84
XP_024421554.1	314	three-prime repair exonuclease 1 [Desmodus rotundus]	Desmodus rotundus	388	388	1	3e-132	79.62
XP_028148058.1	372	uncharacterized protein LOC114341455 [Diabrotica virgifera virgifera]	Diabrotica virgifera virgifera	93.2	93.2	0.53	1e-17	34.3
XP_008468313.1	309	exonuclease DPD1, chloroplastic/mitochondrial [Diaphorina citri]	Diaphorina citri	63.9	63.9	0.48	1e-07	33.77
XP_012890780.1	236	PREDICTED: three prime repair exonuclease 2 [Dipodomys ordii]	Dipodomys ordii	155	155	0.7	3e-42	47.79
XP_012885722.1	303	PREDICTED: three-prime repair exonuclease 1 [Dipodomys ordii]	Dipodomys ordii	349	349	1	3e-117	73.73
XP_042523491.1	236	three prime repair exonuclease 2 [Dipodomys spectabilis]	Dipodomys spectabilis	155	155	0.7	3e-42	47.79
XP_042522029.1	303	three-prime repair exonuclease 1 [Dipodomys spectabilis]	Dipodomys spectabilis	347	347	1	2e-116	73.42
XP_046734844.1	312	three prime repair exonuclease 2 [Diprion similis]	Diprion similis	75.5	75.5	0.5	1e-11	33.95
XP_043829567.1	241	three prime repair exonuclease 2 [Dromiciops gliroides]	Dromiciops gliroides	155	155	0.71	3e-42	42.36
XP_043833144.1	325	three-prime repair exonuclease 1 [Dromiciops gliroides]	Dromiciops gliroides	286	286	0.75	7e-92	66.25
XP_001961489.1	362	uncharacterized protein LOC6497809 [Drosophila ananassae]	Drosophila ananassae	59.7	59.7	0.51	3e-06	32.37
XP_017858569.1	349	PREDICTED: uncharacterized protein LOC108610786 [Drosophila arizonae]	Drosophila arizonae	60.1	60.1	0.5	2e-06	32.93
XP_016954810.1	390	uncharacterized protein LOC108027763 [Drosophila biarmipes]	Drosophila biarmipes	57	57	0.48	3e-05	32.1
XP_017097244.2	361	uncharacterized protein LOC108125531 [Drosophila bipectinata]	Drosophila bipectinata	59.3	59.3	0.47	5e-06	33.75
XP_017117162.1	351	uncharacterized protein LOC108139054 [Drosophila elegans]	Drosophila elegans	59.3	59.3	0.51	5e-06	30.36
XP_001968498.1	348	uncharacterized protein LOC6541864 [Drosophila erecta]	Drosophila erecta	66.2	66.2	0.51	2e-08	34.15
XP_017076055.1	346	uncharacterized protein LOC108111183 isoform X1 [Drosophila eugracilis]	Drosophila eugracilis	58.2	58.2	0.47	1e-05	33.12
XP_017076057.1	310	uncharacterized protein LOC108111183 isoform X2 [Drosophila eugracilis]	Drosophila eugracilis	48.5	48.5	0.31	0.012	36.73
XP_017047537.1	338	uncharacterized protein LOC108092459 [Drosophila ficusphila]	Drosophila ficusphila	57.8	57.8	0.47	1e-05	32.47
XP_001988295.1	343	three-prime repair exonuclease 1 [Drosophila grimshawi]	Drosophila grimshawi	59.3	59.3	0.49	5e-06	30.41
XP_034129447.1	362	three-prime repair exonuclease 1 [Drosophila guanche]	Drosophila guanche	51.6	99.4	0.7	0.002	28.82
XP_023177571.2	346	uncharacterized protein LOC111603965 [Drosophila hydei]	Drosophila hydei	58.2	58.2	0.49	1e-05	29.88
XP_034472932.1	353	uncharacterized protein LOC117780483 [Drosophila innubila]	Drosophila innubila	57.8	57.8	0.5	2e-05	32.18
XP_034473910.1	338	uncharacterized protein LOC117781265 [Drosophila innubila]	Drosophila innubila	58.2	58.2	0.5	9e-06	34.13
XP_017023939.1	355	uncharacterized protein LOC108075857 [Drosophila kikkawai]	Drosophila kikkawai	59.3	59.3	0.47	4e-06	34.62
XP_033153189.1	353	uncharacterized protein LOC117136399 [Drosophila mauritiana]	Drosophila mauritiana	59.3	59.3	0.51	4e-06	32.14
NP_001285571.1	351	uncharacterized protein Dmel_CG3165, isoform B [Drosophila melanogaster]	Drosophila melanogaster	55.1	55.1	0.48	0.0001	32.28
XP_017154543.1	378	three-prime repair exonuclease 1 [Drosophila miranda]	Drosophila miranda	55.8	55.8	0.52	6e-05	33.33
XP_002002848.2	369	uncharacterized protein LOC6576864 isoform X1 [Drosophila mojavensis]	Drosophila mojavensis	59.3	59.3	0.49	4e-06	32.32
XP_015020885.1	348	uncharacterized protein LOC6576864 isoform X2 [Drosophila mojavensis]	Drosophila mojavensis	59.7	59.7	0.49	3e-06	32.32
XP_030241298.1	348	uncharacterized protein LOC115563060 [Drosophila navojoa]	Drosophila navojoa	61.2	61.2	0.5	9e-07	32.93
XP_030561787.1	339	uncharacterized protein LOC115763387 [Drosophila novamexicana]	Drosophila novamexicana	54.3	54.3	0.5	0.0002	27.88
XP_041448329.1	378	three-prime repair exonuclease 1 [Drosophila obscura]	Drosophila obscura	58.2	105	0.73	1e-05	30.54
XP_002021806.1	335	uncharacterized protein LOC6596284 [Drosophila persimilis]	Drosophila persimilis	56.6	56.6	0.53	3e-05	33.33
XP_001356147.2	335	uncharacterized protein LOC4816453 [Drosophila pseudoobscura]	Drosophila pseudoobscura	57.4	57.4	0.52	2e-05	33.92
XP_016987675.1	357	uncharacterized protein LOC108050479 [Drosophila rhopaloa]	Drosophila rhopaloa	58.9	58.9	0.47	6e-06	31.82
XP_039501461.1	361	uncharacterized protein LOC120458023 [Drosophila santomea]	Drosophila santomea	59.3	59.3	0.48	4e-06	32.08
XP_002037661.1	353	uncharacterized protein LOC6613180 [Drosophila sechellia]	Drosophila sechellia	60.8	60.8	0.51	1e-06	32.14
XP_020810815.1	360	uncharacterized protein LOC110186109 [Drosophila serrata]	Drosophila serrata	57.4	57.4	0.48	2e-05	31.29
XP_016023216.1	353	uncharacterized protein LOC6730799 [Drosophila simulans]	Drosophila simulans	59.7	59.7	0.51	4e-06	32.14
XP_034670124.1	365	three-prime repair exonuclease 1 [Drosophila subobscura]	Drosophila subobscura	55.5	103	0.7	9e-05	31.79
XP_037708520.1	372	uncharacterized protein LOC119546363 [Drosophila subpulchrella]	Drosophila subpulchrella	55.8	55.8	0.48	6e-05	32.5
XP_016940284.1	380	uncharacterized protein LOC108017683 [Drosophila suzukii]	Drosophila suzukii	58.9	58.9	0.48	6e-06	31.88
XP_017003979.2	346	uncharacterized protein LOC108062000 [Drosophila takahashii]	Drosophila takahashii	57	57	0.47	2e-05	32.7
XP_043652456.1	364	uncharacterized protein LOC122619533 [Drosophila teissieri]	Drosophila teissieri	60.8	60.8	0.53	1e-06	30.94
XP_015025191.1	344	uncharacterized protein LOC6634104 [Drosophila virilis]	Drosophila virilis	54.7	54.7	0.5	0.0002	28.24
XP_002067177.1	367	uncharacterized protein LOC6644082 [Drosophila willistoni]	Drosophila willistoni	59.7	59.7	0.49	3e-06	31.01
XP_002087759.1	361	uncharacterized protein LOC6526651 [Drosophila yakuba]	Drosophila yakuba	58.2	58.2	0.51	1e-05	31.74
XP_015435206.1	326	PREDICTED: uncharacterized protein LOC107190834 [Dufourea novaeangliae]	Dufourea novaeangliae	64.3	64.3	0.48	9e-08	33.12
XP_024356089.1	277	Three prime repair exonuclease [Echinococcus granulosus]	Echinococcus granulosus	95.9	95.9	0.73	4e-19	28.84
XP_045141426.1	311	three prime repair exonuclease 2 isoform X1 [Echinops telfairi]	Echinops telfairi	154	154	0.7	1e-40	46.9
XP_045141427.1	231	three prime repair exonuclease 2 isoform X2 [Echinops telfairi]	Echinops telfairi	154	154	0.71	1e-41	46.7
XP_004704037.1	311	three-prime repair exonuclease 1 [Echinops telfairi]	Echinops telfairi	380	380	1	4e-129	76.75
XP_006893085.1	314	PREDICTED: three prime repair exonuclease 1 [Elephantulus edwardii]	Elephantulus edwardii	363	363	1	9e-123	77.39
XP_006900051.1	236	PREDICTED: three prime repair exonuclease 2 [Elephantulus edwardii]	Elephantulus edwardii	148	148	0.7	2e-39	45.13
XP_022347017.1	236	three prime repair exonuclease 2 [Enhydra lutris kenyoni]	Enhydra lutris kenyoni	157	157	0.7	6e-43	47.35
XP_022354199.1	313	three-prime repair exonuclease 1 [Enhydra lutris kenyoni]	Enhydra lutris kenyoni	388	388	1	2e-132	78.03
XP_008157453.1	236	three prime repair exonuclease 2 [Eptesicus fuscus]	Eptesicus fuscus	158	158	0.7	2e-43	46.9
XP_008155941.1	309	three-prime repair exonuclease 1 [Eptesicus fuscus]	Eptesicus fuscus	352	352	0.99	3e-118	76.92
XP_044619255.1	236	three prime repair exonuclease 2 [Equus asinus]	Equus asinus	147	147	0.7	6e-39	44.69
XP_014682120.2	314	three-prime repair exonuclease 1 [Equus asinus]	Equus asinus	396	396	1	2e-135	81.85
XP_005614677.1	236	three prime repair exonuclease 2 [Equus caballus]	Equus caballus	150	150	0.7	5e-40	45.13
XP_005600757.1	314	three-prime repair exonuclease 1 [Equus caballus]	Equus caballus	394	394	1	1e-134	81.53
XP_008510310.1	92	PREDICTED: three prime repair exonuclease 2 [Equus przewalskii]	Equus przewalskii	67.4	67.4	0.27	2e-10	45.35	Not included in alignment due to length <= 130 aa
XP_046529234.1	236	three prime repair exonuclease 2 [Equus quagga]	Equus quagga	150	150	0.7	4e-40	45.13
XP_046517666.1	314	three-prime repair exonuclease 1 [Equus quagga]	Equus quagga	397	397	1	6e-136	82.17
XP_007534962.1	236	PREDICTED: three prime repair exonuclease 2 [Erinaceus europaeus]	Erinaceus europaeus	152	152	0.71	9e-41	45.41
XP_007533646.1	309	PREDICTED: three-prime repair exonuclease 1 [Erinaceus europaeus]	Erinaceus europaeus	369	369	1	5e-125	76.43
XP_028669218.1	264	three prime repair exonuclease 2-like [Erpetoichthys calabaricus]	Erpetoichthys calabaricus	147	147	0.75	8e-39	40.76
XP_017763733.1	326	PREDICTED: uncharacterized protein LOC108553377 [Eufriesea mexicana]	Eufriesea mexicana	59.7	59.7	0.42	3e-06	34.33
XP_027950186.1	236	three prime repair exonuclease 2 [Eumetopias jubatus]	Eumetopias jubatus	152	152	0.7	6e-41	47.35
XP_027980064.1	314	three-prime repair exonuclease 1 [Eumetopias jubatus]	Eumetopias jubatus	405	405	1	4e-139	81.21
XP_023328799.1	501	uncharacterized protein LOC111701651 [Eurytemora affinis]	Eurytemora affinis	79.7	79.7	0.48	1e-12	37.2
XP_020904441.1	274	three prime repair exonuclease 2 [Exaiptasia diaphana]	Exaiptasia diaphana	101	101	0.69	3e-21	36.44
XP_006944163.1	236	three prime repair exonuclease 2 [Felis catus]	Felis catus	152	152	0.7	7e-41	46.02
XP_006928782.1	314	three-prime repair exonuclease 1 [Felis catus]	Felis catus	403	403	1	3e-138	81.53
XP_029661959.1	326	uncharacterized protein LOC115234777 [Formica exsecta]	Formica exsecta	57	57	0.46	3e-05	31.08
XP_029662010.1	326	uncharacterized protein LOC115234807 isoform X1 [Formica exsecta]	Formica exsecta	58.9	58.9	0.49	5e-06	30.91
XP_029672136.1	326	uncharacterized protein LOC115240870 isoform X1 [Formica exsecta]	Formica exsecta	58.9	58.9	0.49	5e-06	30.91
XP_026274099.1	327	uncharacterized protein LOC113203556 [Frankliniella occidentalis]	Frankliniella occidentalis	71.2	71.2	0.48	4e-10	37.66
XP_043519167.1	332	uncharacterized protein LOC122533481 [Frieseomelitta varia]	Frieseomelitta varia	66.2	66.2	0.41	2e-08	36.84
XP_010626315.1	236	three prime repair exonuclease 2 [Fukomys damarensis]	Fukomys damarensis	156	156	0.7	2e-42	46.9
XP_010613946.1	374	three-prime repair exonuclease 1 isoform X1 [Fukomys damarensis]	Fukomys damarensis	387	387	1	3e-131	79.3
XP_010613947.1	354	three-prime repair exonuclease 1 isoform X2 [Fukomys damarensis]	Fukomys damarensis	369	369	0.96	3e-124	79.14
XP_003745182.1	375	uncharacterized protein LOC100906512 [Galendromus occidentalis]	Galendromus occidentalis	74.7	74.7	0.48	3e-11	36.31
XP_008575275.1	236	PREDICTED: three prime repair exonuclease 2 [Galeopterus variegatus]	Galeopterus variegatus	155	155	0.71	3e-42	45.61
XP_008563951.1	314	PREDICTED: three-prime repair exonuclease 1-like [Galeopterus variegatus]	Galeopterus variegatus	406	406	1	2e-139	85.99
XP_008572308.1	281	PREDICTED: three-prime repair exonuclease 1-like isoform X1 [Galeopterus variegatus]	Galeopterus variegatus	277	277	0.63	3e-89	84
XP_026764944.1	269	three prime repair exonuclease 2-like [Galleria mellonella]	Galleria mellonella	82.4	82.4	0.7	2e-14	28.26
XP_026750742.1	282	three-prime repair exonuclease 1-like [Galleria mellonella]	Galleria mellonella	90.9	90.9	0.7	3e-17	26.88
XP_026750741.1	348	uncharacterized protein LOC113511313 [Galleria mellonella]	Galleria mellonella	77.4	77.4	0.49	3e-12	33.12
XP_015270962.1	227	PREDICTED: three prime repair exonuclease 2 [Gekko japonicus]	Gekko japonicus	160	160	0.71	3e-44	44.69
XP_015272743.1	333	PREDICTED: three-prime repair exonuclease 1 [Gekko japonicus]	Gekko japonicus	182	182	0.72	2e-51	43.83
XP_033777101.1	269	three prime repair exonuclease 2 [Geotrypetes seraphini]	Geotrypetes seraphini	152	152	0.73	1e-40	42.67
XP_033782388.1	334	three prime repair exonuclease 2-like [Geotrypetes seraphini]	Geotrypetes seraphini	200	200	0.72	2e-58	47.23
XP_041370270.1	212	three-prime repair exonuclease 1-like [Gigantopelta aegis]	Gigantopelta aegis	101	101	0.74	7e-22	34.32
XP_041369436.1	215	three-prime repair exonuclease 1-like [Gigantopelta aegis]	Gigantopelta aegis	130	130	0.71	8e-33	37.83
XP_041371175.1	648	uncharacterized protein LOC121384721 [Gigantopelta aegis]	Gigantopelta aegis	84.3	149	0.71	4e-14	33.33
XP_030706233.1	217	LOW QUALITY PROTEIN: three prime repair exonuclease 2 [Globicephala melas]	Globicephala melas	99.8	99.8	0.7	4e-21	36.89
XP_037884145.1	326	three-prime repair exonuclease 1 isoform X1 [Glossina fuscipes]	Glossina fuscipes	57.8	57.8	0.5	1e-05	34.29
XP_037884146.1	314	three-prime repair exonuclease 1 isoform X2 [Glossina fuscipes]	Glossina fuscipes	61.2	61.2	0.5	1e-06	36.59
XP_030403074.1	225	three prime repair exonuclease 2 [Gopherus evgoodei]	Gopherus evgoodei	134	134	0.72	4e-34	41.23
XP_018874715.1	236	three prime repair exonuclease 2 [Gorilla gorilla gorilla]	Gorilla gorilla gorilla	152	152	0.7	6e-41	46.02
XP_030865682.1	369	three-prime repair exonuclease 1 [Gorilla gorilla gorilla]	Gorilla gorilla gorilla	470	470	1	8e-164	98.09
XP_044538919.1	241	three prime repair exonuclease 2 [Gracilinanus agilis]	Gracilinanus agilis	158	158	0.7	4e-43	43.11
XP_044540438.1	326	three-prime repair exonuclease 1 [Gracilinanus agilis]	Gracilinanus agilis	276	276	0.75	5e-88	66.67
XP_028641118.1	255	three prime repair exonuclease 2 isoform X1 [Grammomys surdaster]	Grammomys surdaster	148	148	0.7	3e-39	44.25
XP_028641121.1	236	three prime repair exonuclease 2 isoform X2 [Grammomys surdaster]	Grammomys surdaster	148	148	0.7	2e-39	44.25
XP_028612526.1	314	three-prime repair exonuclease 1 [Grammomys surdaster]	Grammomys surdaster	335	335	1	2e-111	71.97
XP_017787836.1	326	PREDICTED: uncharacterized protein LOC108570482 [Habropoda laboriosa]	Habropoda laboriosa	67	67	0.52	1e-08	33.73
XP_035949636.1	236	three prime repair exonuclease 2 [Halichoerus grypus]	Halichoerus grypus	152	152	0.7	5e-41	47.35
XP_035935292.1	349	three-prime repair exonuclease 1 isoform X1 [Halichoerus grypus]	Halichoerus grypus	338	338	0.89	2e-112	79.79
XP_035935296.1	314	three-prime repair exonuclease 1 isoform X2 [Halichoerus grypus]	Halichoerus grypus	405	405	1	4e-139	81.53
XP_046552877.1	246	LOW QUALITY PROTEIN: three-prime repair exonuclease 1-like [Haliotis rubra]	Haliotis rubra	135	135	0.71	2e-34	40.24
XP_046573332.1	246	three-prime repair exonuclease 1-like [Haliotis rubra]	Haliotis rubra	135	135	0.71	2e-34	39.84
XP_046581805.1	392	uncharacterized protein LOC124289244 [Haliotis rubra]	Haliotis rubra	96.7	96.7	0.5	9e-19	38.79
XP_046362193.2	828	serine-rich adhesin for platelets-like [Haliotis rufescens]	Haliotis rufescens	97.4	162	0.67	2e-18	40.26
XP_046360405.2	243	three-prime repair exonuclease 1-like [Haliotis rufescens]	Haliotis rufescens	137	137	0.71	6e-35	39.51
XP_048245399.1	231	three-prime repair exonuclease 1-like isoform X1 [Haliotis rufescens]	Haliotis rufescens	109	109	0.66	2e-24	38.57
XP_046362192.2	210	three-prime repair exonuclease 1-like isoform X2 [Haliotis rufescens]	Haliotis rufescens	108	108	0.66	2e-24	38.57
XP_024218880.1	309	uncharacterized protein LOC106677796 [Halyomorpha halys]	Halyomorpha halys	86.3	86.3	0.5	2e-15	35.4
XP_045470858.1	240	three prime repair exonuclease 2-like [Harmonia axyridis]	Harmonia axyridis	112	112	0.71	1e-25	32.38
XP_045463130.1	298	three-prime repair exonuclease 1-like [Harmonia axyridis]	Harmonia axyridis	82.4	82.4	0.53	4e-14	32.35
XP_045463127.1	336	uncharacterized protein LOC123672855 [Harmonia axyridis]	Harmonia axyridis	78.6	78.6	0.5	1e-12	33.54
XP_021193307.1	273	three-prime repair exonuclease 1-like [Helicoverpa armigera]	Helicoverpa armigera	57.4	57.4	0.7	1e-05	22.02
XP_021183434.1	324	uncharacterized protein LOC110371475 [Helicoverpa armigera]	Helicoverpa armigera	77	77	0.52	4e-12	35.29
XP_021188544.1	334	uncharacterized protein LOC110374934 [Helicoverpa armigera]	Helicoverpa armigera	69.7	69.7	0.49	1e-09	31.45
XP_021193306.1	279	uncharacterized protein LOC110378395 [Helicoverpa armigera]	Helicoverpa armigera	55.8	55.8	0.46	4e-05	31.33
XP_047019087.1	240	three prime repair exonuclease 2-like [Helicoverpa zea]	Helicoverpa zea	53.9	53.9	0.68	0.0002	25.81
XP_047026674.1	258	three prime repair exonuclease 2-like [Helicoverpa zea]	Helicoverpa zea	60.1	60.1	0.46	1e-06	28.19
XP_047019089.1	237	three prime repair exonuclease 2-like isoform X2 [Helicoverpa zea]	Helicoverpa zea	66.2	66.2	0.71	1e-08	22.8
XP_047035366.1	334	uncharacterized protein LOC124641353 [Helicoverpa zea]	Helicoverpa zea	69.7	69.7	0.49	1e-09	31.45
XP_047037637.1	321	uncharacterized protein LOC124642923 [Helicoverpa zea]	Helicoverpa zea	77.4	77.4	0.52	3e-12	34.71
XP_009025820.1	850	hypothetical protein HELRODRAFT_189337 [Helobdella robusta]	Helobdella robusta	94.7	94.7	0.49	1e-17	39.49
XP_037907318.1	231	three prime repair exonuclease 2-like [Hermetia illucens]	Hermetia illucens	103	103	0.72	4e-22	31.44
XP_037905856.1	244	three prime repair exonuclease 2-like [Hermetia illucens]	Hermetia illucens	92.4	92.4	0.73	3e-18	29.76
XP_037908236.1	343	uncharacterized protein LOC119649909 [Hermetia illucens]	Hermetia illucens	76.6	76.6	0.49	6e-12	33.76
XP_037908401.1	653	uncharacterized protein LOC119650007 isoform X1 [Hermetia illucens]	Hermetia illucens	68.2	68.2	0.49	8e-09	28.48
XP_037908402.1	535	uncharacterized protein LOC119650007 isoform X2 [Hermetia illucens]	Hermetia illucens	68.9	68.9	0.49	4e-09	28.48
XP_004874976.1	236	three prime repair exonuclease 2 [Heterocephalus glaber]	Heterocephalus glaber	150	150	0.71	5e-40	45.37
XP_004833998.1	313	three-prime repair exonuclease 1 [Heterocephalus glaber]	Heterocephalus glaber	391	391	1	1e-133	78.98
XP_019519853.1	236	PREDICTED: three prime repair exonuclease 2 [Hipposideros armiger]	Hipposideros armiger	150	150	0.7	3e-40	46.02
XP_019489941.1	368	PREDICTED: three-prime repair exonuclease 1 isoform X1 [Hipposideros armiger]	Hipposideros armiger	386	386	1	1e-130	80.57
XP_019489946.1	341	PREDICTED: three-prime repair exonuclease 1 isoform X2 [Hipposideros armiger]	Hipposideros armiger	386	386	1	3e-131	80.57
XP_042216488.1	441	uncharacterized protein LOC121862338 [Homarus americanus]	Homarus americanus	90.9	90.9	0.49	1e-16	34.12
NP_542432.2	236	three prime repair exonuclease 2 [Homo sapiens]	Homo sapiens	152	152	0.7	4e-41	46.46	Human TREX2
AAH23630.1	369	Three prime repair exonuclease 1 [Homo sapiens]	Homo sapiens						Human TREX1 a isoform, added from NCBI GenPept
NP_338599.1	314	three-prime repair exonuclease 1 isoform b [Homo sapiens]	Homo sapiens	479	479	1	2e-168	100	Human TREX1b isoform
NP_009179.2	304	three-prime repair exonuclease 1 isoform c [Homo sapiens]	Homo sapiens	460	460	0.96	8e-161	100	Human TREX1c isoform
XP_039075222.1	236	three prime repair exonuclease 2 isoform X3 [Hyaena hyaena]	Hyaena hyaena	150	150	0.7	2e-40	47.35
XP_039084097.1	314	three-prime repair exonuclease 1 [Hyaena hyaena]	Hyaena hyaena	388	388	1	3e-132	80.89
XP_039075220.1	492	uncharacterized protein LOC120221729 isoform X1 [Hyaena hyaena]	Hyaena hyaena	150	150	0.7	1e-37	47.35
XP_018018450.1	552	uncharacterized protein LOC108674970 [Hyalella azteca]	Hyalella azteca	52.8	52.8	0.32	0.0007	30.77
XP_032613823.1	428	three prime repair exonuclease 2 isoform X1 [Hylobates moloch]	Hylobates moloch	150	150	0.7	2e-38	46.02
XP_032613824.1	236	three prime repair exonuclease 2 isoform X2 [Hylobates moloch]	Hylobates moloch	152	152	0.7	9e-41	46.02
XP_032017557.1	314	three-prime repair exonuclease 1 [Hylobates moloch]	Hylobates moloch	469	469	1	3e-164	98.09
XP_026318254.1	309	uncharacterized protein LOC113229001 [Hyposmocoma kahamanoa]	Hyposmocoma kahamanoa	67.8	67.8	0.46	4e-09	34.21
XP_026318310.1	297	uncharacterized protein LOC113229045 [Hyposmocoma kahamanoa]	Hyposmocoma kahamanoa	67.8	67.8	0.5	5e-09	34.38
XP_005340646.1	236	three prime repair exonuclease 2 [Ictidomys tridecemlineatus]	Ictidomys tridecemlineatus	154	154	0.71	9e-42	45.81
XP_021583100.1	367	three-prime repair exonuclease 1 isoform X1 [Ictidomys tridecemlineatus]	Ictidomys tridecemlineatus	389	389	0.97	8e-132	82.62
XP_005326927.1	314	three-prime repair exonuclease 1 isoform X2 [Ictidomys tridecemlineatus]	Ictidomys tridecemlineatus	410	410	1	6e-141	83.44
XP_046390382.1	382	uncharacterized protein LOC124158976 [Ischnura elegans]	Ischnura elegans	82	82	0.56	1e-13	33.7
XP_029822995.3	238	three-prime repair exonuclease 1 [Ixodes scapularis]	Ixodes scapularis	122	122	0.73	3e-29	35.86
XP_042148577.1	280	three-prime repair exonuclease 1 [Ixodes scapularis]	Ixodes scapularis	58.5	113	0.66	6e-06	34.27
XP_029823007.2	377	three-prime repair exonuclease 1-like isoform X1 [Ixodes scapularis]	Ixodes scapularis	104	104	0.67	1e-21	36.87
XP_040070831.1	358	uncharacterized protein LOC8036074 isoform X2 [Ixodes scapularis]	Ixodes scapularis	86.7	86.7	0.64	3e-15	33.82
XP_040070832.1	305	uncharacterized protein LOC8036074 isoform X3 [Ixodes scapularis]	Ixodes scapularis	71.2	71.2	0.33	3e-10	38.18
XP_004672116.1	236	three prime repair exonuclease 2 [Jaculus jaculus]	Jaculus jaculus	153	153	0.7	2e-41	45.58
XP_004662083.1	314	three-prime repair exonuclease 1 [Jaculus jaculus]	Jaculus jaculus	405	405	1	5e-139	81.85
XP_033029832.1	225	three prime repair exonuclease 2 [Lacerta agilis]	Lacerta agilis	156	156	0.72	1e-42	42.98
XP_032996641.1	333	three-prime repair exonuclease 1-like [Lacerta agilis]	Lacerta agilis	191	191	0.72	7e-55	48.94
XP_026953703.1	218	LOW QUALITY PROTEIN: three prime repair exonuclease 2 [Lagenorhynchus obliquidens]	Lagenorhynchus obliquidens	104	104	0.7	6e-23	37.78
XP_026954398.1	314	three-prime repair exonuclease 1 [Lagenorhynchus obliquidens]	Lagenorhynchus obliquidens	409	409	1	8e-141	83.12
XP_006014265.1	242	PREDICTED: three prime repair exonuclease 2 [Latimeria chalumnae]	Latimeria chalumnae	140	140	0.71	4e-36	40
XP_048001004.1	300	exonuclease DPD1, chloroplastic/mitochondrial-like [Leguminivora glycinivorella]	Leguminivora glycinivorella	66.6	66.6	0.49	1e-08	33.75
XP_047993154.1	216	three-prime repair exonuclease 1-like [Leguminivora glycinivorella]	Leguminivora glycinivorella	60.8	60.8	0.7	5e-07	24.05
XP_048000887.1	278	three-prime repair exonuclease 1-like [Leguminivora glycinivorella]	Leguminivora glycinivorella	102	102	0.71	1e-21	28.93
XP_045394120.1	236	three prime repair exonuclease 2 [Lemur catta]	Lemur catta	149	149	0.7	6e-40	45.13
XP_045386284.1	314	three-prime repair exonuclease 1 [Lemur catta]	Lemur catta	407	407	1	4e-140	86.94
XP_045348781.1	314	three-prime repair exonuclease 1 [Leopardus geoffroyi]	Leopardus geoffroyi	399	399	1	1e-136	80.57
XP_006625467.1	244	PREDICTED: three prime repair exonuclease 2-like [Lepisosteus oculatus]	Lepisosteus oculatus	137	137	0.71	4e-35	44.84
XP_023018586.1	301	three prime repair exonuclease 2-like [Leptinotarsa decemlineata]	Leptinotarsa decemlineata	79.3	79.3	0.5	5e-13	33.74
XP_023020504.1	224	three-prime repair exonuclease 1-like [Leptinotarsa decemlineata]	Leptinotarsa decemlineata	100	100	0.68	2e-21	29.73
XP_030891593.1	269	three prime repair exonuclease 2 [Leptonychotes weddellii]	Leptonychotes weddellii	151	151	0.7	4e-40	47.35
XP_006750724.1	314	three-prime repair exonuclease 1 [Leptonychotes weddellii]	Leptonychotes weddellii	402	402	1	5e-138	80.89
XP_013772037.1	423	uncharacterized protein LOC106457189 [Limulus polyphemus]	Limulus polyphemus	95.9	95.9	0.48	2e-18	41.03
XP_012222385.1	326	PREDICTED: uncharacterized protein LOC105672195 [Linepithema humile]	Linepithema humile	60.1	60.1	0.46	2e-06	31.76
XP_023929932.1	454	uncharacterized protein LOC106175307 isoform X1 [Lingula anatina]	Lingula anatina	75.9	125	0.74	2e-11	35.37
XP_013412705.1	448	uncharacterized protein LOC106175307 isoform X2 [Lingula anatina]	Lingula anatina	75.9	125	0.74	2e-11	35.37
XP_007472252.1	368	PREDICTED: LOW QUALITY PROTEIN: three prime repair exonuclease 1 [Lipotes vexillifer]	Lipotes vexillifer	407	407	1	4e-139	83.12
XP_007456694.1	78	PREDICTED: three prime repair exonuclease 2 [Lipotes vexillifer]	Lipotes vexillifer	50.1	50.1	0.23	0.0002	41.89	Not included in alignment due to length <= 130 aa
XP_032702186.1	236	three prime repair exonuclease 2 [Lontra canadensis]	Lontra canadensis	156	156	0.7	1e-42	47.35
XP_032723850.1	313	three-prime repair exonuclease 1 [Lontra canadensis]	Lontra canadensis	391	391	1	1e-133	78.34
XP_009054105.1	236	hypothetical protein LOTGIDRAFT_227290 [Lottia gigantea]	Lottia gigantea	129	129	0.71	4e-32	37.13
XP_010599408.1	236	three prime repair exonuclease 2 [Loxodonta africana]	Loxodonta africana	150	150	0.7	2e-40	46.02
XP_010588136.1	314	three-prime repair exonuclease 1 [Loxodonta africana]	Loxodonta africana	358	358	1	1e-120	80.89
XP_023305487.2	353	uncharacterized protein LOC111687289 [Lucilia cuprina]	Lucilia cuprina	55.1	55.1	0.49	0.0001	26.82
XP_037809685.1	355	uncharacterized protein LOC119602318 [Lucilia sericata]	Lucilia sericata	54.7	54.7	0.53	0.0002	25
XP_047571569.1	236	three prime repair exonuclease 2 [Lutra lutra]	Lutra lutra	152	152	0.7	4e-41	46.9
XP_047550817.1	313	three-prime repair exonuclease 1-like [Lutra lutra]	Lutra lutra	386	386	1	1e-131	77.71
XP_030162536.1	314	three-prime repair exonuclease 1 [Lynx canadensis]	Lynx canadensis	400	400	1	6e-137	81.53
XP_046954428.1	236	three prime repair exonuclease 2 [Lynx rufus]	Lynx rufus	152	152	0.7	6e-41	46.02
XP_041481458.1	279	three prime repair exonuclease 2-like [Lytechinus variegatus]	Lytechinus variegatus	110	110	0.71	1e-24	30.97
XP_041481708.1	337	three prime repair exonuclease 2-like [Lytechinus variegatus]	Lytechinus variegatus	78.6	132	0.71	1e-12	32.3
XP_041481770.1	438	uncharacterized protein LOC121428942 [Lytechinus variegatus]	Lytechinus variegatus	78.2	126	0.68	3e-12	33.73
XP_005594952.1	236	three prime repair exonuclease 2 [Macaca fascicularis]	Macaca fascicularis	152	152	0.7	6e-41	46.46
XP_005547076.2	314	three-prime repair exonuclease 1 [Macaca fascicularis]	Macaca fascicularis	453	453	1	4e-158	95.22
XP_002802855.1	474	three-prime repair exonuclease 1 [Macaca mulatta]	Macaca mulatta	449	449	1	7e-154	95.54
XP_011715162.1	264	three prime repair exonuclease 2 isoform X1 [Macaca nemestrina]	Macaca nemestrina	152	152	0.7	2e-40	46.46
XP_011715163.1	236	three prime repair exonuclease 2 isoform X2 [Macaca nemestrina]	Macaca nemestrina	152	152	0.7	7e-41	46.46
XP_011737524.1	314	three-prime repair exonuclease 1 [Macaca nemestrina]	Macaca nemestrina	452	452	1	2e-157	94.9
XP_011857628.1	275	PREDICTED: three prime repair exonuclease 2 [Mandrillus leucophaeus]	Mandrillus leucophaeus	152	152	0.7	1e-40	46.46
XP_011836379.1	474	PREDICTED: three-prime repair exonuclease 1 isoform X1 [Mandrillus leucophaeus]	Mandrillus leucophaeus	449	449	1	5e-154	95.54
XP_011836380.1	415	PREDICTED: three-prime repair exonuclease 1 isoform X2 [Mandrillus leucophaeus]	Mandrillus leucophaeus	444	444	0.99	5e-153	95.5
XP_030027396.2	285	three prime repair exonuclease 2-like [Manduca sexta]	Manduca sexta	93.2	93.2	0.7	5e-18	26.91
XP_030038630.2	316	uncharacterized protein LOC115454026 [Manduca sexta]	Manduca sexta	67	67	0.48	1e-08	30.32
XP_034826238.1	273	LOW QUALITY PROTEIN: three prime repair exonuclease 2-like [Maniola hyperantus]	Maniola hyperantus	84	84	0.48	9e-15	33.33
XP_034825872.1	302	three-prime repair exonuclease 1-like [Maniola hyperantus]	Maniola hyperantus	64.7	64.7	0.45	5e-08	31.97
XP_045761942.1	274	three prime repair exonuclease 2-like [Maniola jurtina]	Maniola jurtina	81.6	81.6	0.48	5e-14	32.89
XP_045762299.1	430	uncharacterized protein LOC123865354 [Maniola jurtina]	Maniola jurtina	66.2	66.2	0.46	3e-08	32.21
XP_017526161.2	261	three prime repair exonuclease 2 isoform X1 [Manis javanica]	Manis javanica	159	159	0.7	2e-43	46.9
XP_017526160.1	236	three prime repair exonuclease 2 isoform X2 [Manis javanica]	Manis javanica	160	160	0.7	7e-44	46.9
XP_017524818.1	308	three-prime repair exonuclease 1 isoform X1 [Manis javanica]	Manis javanica	345	345	1	2e-115	74.68
XP_017524819.1	260	three-prime repair exonuclease 1 isoform X2 [Manis javanica]	Manis javanica	275	275	0.8	9e-89	73.73
XP_036743119.1	236	three prime repair exonuclease 2 [Manis pentadactyla]	Manis pentadactyla	157	157	0.7	7e-43	46.46
XP_036733985.1	365	three-prime repair exonuclease 1 isoform X1 [Manis pentadactyla]	Manis pentadactyla	317	317	0.93	1e-103	75.17
XP_036733986.1	357	three-prime repair exonuclease 1 isoform X2 [Manis pentadactyla]	Manis pentadactyla	304	304	0.91	1e-98	74.83
XP_036733988.1	308	three-prime repair exonuclease 1 isoform X4 [Manis pentadactyla]	Manis pentadactyla	350	350	1	1e-117	75.16
XP_027777524.1	236	three prime repair exonuclease 2 [Marmota flaviventris]	Marmota flaviventris	150	150	0.7	2e-40	45.74
XP_027789484.1	314	three-prime repair exonuclease 1 [Marmota flaviventris]	Marmota flaviventris	405	405	1	5e-139	82.48
XP_015362471.1	236	three prime repair exonuclease 2 [Marmota marmota marmota]	Marmota marmota marmota	150	150	0.7	5e-40	45.74
XP_015342756.1	314	three-prime repair exonuclease 1 [Marmota marmota marmota]	Marmota marmota marmota	402	402	1	6e-138	82.17
XP_046309279.1	236	three prime repair exonuclease 2 [Marmota monax]	Marmota monax	154	154	0.7	1e-41	46.19
XP_046287496.1	314	three-prime repair exonuclease 1 [Marmota monax]	Marmota monax	405	405	1	3e-139	82.48
XP_031230253.1	236	three prime repair exonuclease 2 [Mastomys coucha]	Mastomys coucha	149	149	0.7	1e-39	44.69
XP_031201661.1	343	three-prime repair exonuclease 1 [Mastomys coucha]	Mastomys coucha	334	334	0.78	9e-111	79.18
XP_044856349.1	221	three prime repair exonuclease 2 [Mauremys mutica]	Mauremys mutica	143	143	0.72	1e-37	42.11
XP_039366396.1	221	three prime repair exonuclease 2 [Mauremys reevesii]	Mauremys reevesii	145	145	0.72	2e-38	42.11
XP_003704631.1	317	PREDICTED: uncharacterized protein LOC100883143 isoform X1 [Megachile rotundata]	Megachile rotundata	65.1	65.1	0.5	5e-08	29.81
XP_033323616.1	332	uncharacterized protein LOC117218957 isoform X1 [Megalopta genalis]	Megalopta genalis	58.5	58.5	0.47	7e-06	34.21
XP_033323617.1	298	uncharacterized protein LOC117218957 isoform X2 [Megalopta genalis]	Megalopta genalis	59.7	59.7	0.47	3e-06	33.55
XP_033326094.1	321	uncharacterized protein LOC117220338 isoform X1 [Megalopta genalis]	Megalopta genalis	59.7	59.7	0.42	3e-06	34.33
XP_033326097.1	305	uncharacterized protein LOC117220338 isoform X2 [Megalopta genalis]	Megalopta genalis	60.1	60.1	0.42	2e-06	34.33
XP_045851963.1	236	three prime repair exonuclease 2 [Meles meles]	Meles meles	154	154	0.7	1e-41	47.35
XP_045846024.1	313	three-prime repair exonuclease 1 [Meles meles]	Meles meles	387	387	1	6e-132	77.71
XP_045455960.1	261	three-prime repair exonuclease 1-like [Melitaea cinxia]	Melitaea cinxia	83.6	83.6	0.69	1e-14	26.98
XP_045455832.1	287	three-prime repair exonuclease 1-like [Melitaea cinxia]	Melitaea cinxia	71.6	71.6	0.45	2e-10	32.65
XP_045455839.1	291	three-prime repair exonuclease 1-like [Melitaea cinxia]	Melitaea cinxia	74.3	74.3	0.5	3e-11	33.13
XP_045191974.1	246	three-prime repair exonuclease 1-like [Mercenaria mercenaria]	Mercenaria mercenaria	97.1	97.1	0.49	8e-20	40
XP_045208521.1	285	three-prime repair exonuclease 1-like isoform X1 [Mercenaria mercenaria]	Mercenaria mercenaria	125	125	0.71	4e-30	32.5
XP_045208528.1	284	three-prime repair exonuclease 1-like isoform X2 [Mercenaria mercenaria]	Mercenaria mercenaria	125	125	0.71	4e-30	32.5
XP_045158576.1	381	uncharacterized protein LOC123524435 [Mercenaria mercenaria]	Mercenaria mercenaria	54.7	54.7	0.64	0.0001	25.36
XP_045172804.1	422	uncharacterized protein LOC123534572 [Mercenaria mercenaria]	Mercenaria mercenaria	56.6	56.6	0.64	4e-05	25.36
XP_045177146.1	381	uncharacterized protein LOC123537482 isoform X1 [Mercenaria mercenaria]	Mercenaria mercenaria	57	57	0.64	3e-05	25.36
XP_045177149.1	359	uncharacterized protein LOC123537482 isoform X2 [Mercenaria mercenaria]	Mercenaria mercenaria	57	57	0.64	3e-05	25.36
XP_045183390.1	284	uncharacterized protein LOC123541833 [Mercenaria mercenaria]	Mercenaria mercenaria	54.3	54.3	0.46	0.0002	27.33
XP_045194311.1	359	uncharacterized protein LOC123549926 [Mercenaria mercenaria]	Mercenaria mercenaria	56.6	56.6	0.64	4e-05	24.88
XP_045208774.1	373	uncharacterized protein LOC123560674 [Mercenaria mercenaria]	Mercenaria mercenaria	50.8	50.8	0.28	0.003	35.16
XP_045212213.1	252	uncharacterized protein LOC123563423 [Mercenaria mercenaria]	Mercenaria mercenaria	48.5	48.5	0.29	0.012	31.25
XP_045213764.1	395	uncharacterized protein LOC123564325 [Mercenaria mercenaria]	Mercenaria mercenaria	56.2	56.2	0.64	6e-05	25.36
XP_021483625.1	236	three prime repair exonuclease 2 [Meriones unguiculatus]	Meriones unguiculatus	146	146	0.7	1e-38	44.25
XP_021519040.1	344	three-prime repair exonuclease 1 [Meriones unguiculatus]	Meriones unguiculatus	358	358	1	4e-120	72.7
XP_012981323.1	236	three prime repair exonuclease 2 [Mesocricetus auratus]	Mesocricetus auratus	153	153	0.7	2e-41	45.13
XP_005075027.2	361	three-prime repair exonuclease 1 [Mesocricetus auratus]	Mesocricetus auratus	362	362	1	3e-121	75.56
XP_030048270.1	271	three prime repair exonuclease 2 [Microcaecilia unicolor]	Microcaecilia unicolor	145	145	0.71	1e-37	41.33
XP_030048271.1	224	three prime repair exonuclease 2-like [Microcaecilia unicolor]	Microcaecilia unicolor	133	133	0.71	8e-34	40.79
XP_030062043.1	333	three-prime repair exonuclease 1 [Microcaecilia unicolor]	Microcaecilia unicolor	213	213	0.76	2e-63	47.18
XP_012612722.1	236	three prime repair exonuclease 2 [Microcebus murinus]	Microcebus murinus	146	146	0.7	1e-38	45.13
XP_012626631.1	314	three-prime repair exonuclease 1 [Microcebus murinus]	Microcebus murinus	418	418	1	3e-144	88.54
XP_005371887.1	236	three prime repair exonuclease 2 [Microtus ochrogaster]	Microtus ochrogaster	150	150	0.7	5e-40	45.13
XP_005348018.1	313	three-prime repair exonuclease 1 [Microtus ochrogaster]	Microtus ochrogaster	361	361	1	8e-122	76.83
XP_041492823.1	236	three prime repair exonuclease 2 [Microtus oregoni]	Microtus oregoni	150	150	0.7	4e-40	44.69
XP_041532851.1	313	three-prime repair exonuclease 1 [Microtus oregoni]	Microtus oregoni	366	366	1	9e-124	77.14
XP_016070627.1	236	PREDICTED: three prime repair exonuclease 2 [Miniopterus natalensis]	Miniopterus natalensis	149	149	0.7	8e-40	45.13
XP_016058302.1	313	PREDICTED: three-prime repair exonuclease 1 [Miniopterus natalensis]	Miniopterus natalensis	371	371	0.99	1e-125	79.17
XP_045739848.1	269	three prime repair exonuclease 2 [Mirounga angustirostris]	Mirounga angustirostris	152	152	0.7	2e-40	47.79
XP_034867383.1	236	three prime repair exonuclease 2 [Mirounga leonina]	Mirounga leonina	153	153	0.7	3e-41	47.79
XP_034854059.1	314	three-prime repair exonuclease 1 [Mirounga leonina]	Mirounga leonina	402	402	1	6e-138	80.25
XP_021354633.1	226	three-prime repair exonuclease 1-like [Mizuhopecten yessoensis]	Mizuhopecten yessoensis	48.5	48.5	0.63	0.007	29.35
XP_021352011.1	556	uncharacterized protein LOC110449460 isoform X1 [Mizuhopecten yessoensis]	Mizuhopecten yessoensis	101	165	0.7	5e-20	43.4
XP_021352012.1	538	uncharacterized protein LOC110449460 isoform X2 [Mizuhopecten yessoensis]	Mizuhopecten yessoensis	101	165	0.7	5e-20	43.4
XP_036127319.1	236	three prime repair exonuclease 2 [Molossus molossus]	Molossus molossus	155	155	0.7	6e-42	46.02
XP_036122390.1	311	three-prime repair exonuclease 1 [Molossus molossus]	Molossus molossus	384	384	1	7e-131	78.98
XP_007507026.1	241	PREDICTED: three prime repair exonuclease 2 [Monodelphis domestica]	Monodelphis domestica	160	160	0.7	6e-44	44.44
XP_007507152.1	241	PREDICTED: three prime repair exonuclease 2-like [Monodelphis domestica]	Monodelphis domestica	160	160	0.7	7e-44	43.56
XP_001375011.2	294	PREDICTED: three-prime repair exonuclease 1 [Monodelphis domestica]	Monodelphis domestica	273	273	0.74	3e-87	64.83
XP_029095792.1	218	LOW QUALITY PROTEIN: three prime repair exonuclease 2 [Monodon monoceros]	Monodon monoceros	113	113	0.7	4e-26	39.38
XP_028046085.1	350	uncharacterized protein LOC105833606 isoform X1 [Monomorium pharaonis]	Monomorium pharaonis	57.8	57.8	0.44	1e-05	32.87
XP_028046087.1	325	uncharacterized protein LOC105833606 isoform X2 [Monomorium pharaonis]	Monomorium pharaonis	57.8	57.8	0.48	1e-05	30.52
XP_021009765.1	236	three prime repair exonuclease 2 [Mus caroli]	Mus caroli	150	150	0.7	5e-40	45.13
XP_021028672.1	339	three-prime repair exonuclease 1 [Mus caroli]	Mus caroli	330	330	1	4e-109	72.61
NP_036037.1	236	three prime repair exonuclease 2 [Mus musculus]	Mus musculus	152	152	0.7	4e-41	45.13
NP_001012236.1	314	three-prime repair exonuclease 1 [Mus musculus]	Mus musculus	329	329	1	3e-109	71.66
XP_021044365.1	236	three prime repair exonuclease 2 [Mus pahari]	Mus pahari	150	150	0.7	5e-40	44.69
XP_021063240.1	316	three-prime repair exonuclease 1 isoform X1 [Mus pahari]	Mus pahari	333	333	1	1e-110	70.89
XP_029398995.1	270	three-prime repair exonuclease 1 isoform X2 [Mus pahari]	Mus pahari	246	246	0.79	3e-77	67.19
XP_005175049.1	301	PREDICTED: three prime repair exonuclease 2-like [Musca domestica]	Musca domestica	57	57	0.71	2e-05	25.3
XP_005188151.1	349	PREDICTED: uncharacterized protein LOC101891133 [Musca domestica]	Musca domestica	55.8	55.8	0.64	6e-05	24.11
XP_032185373.1	236	three prime repair exonuclease 2 [Mustela erminea]	Mustela erminea	155	155	0.7	5e-42	46.9
XP_032174682.1	313	three-prime repair exonuclease 1 [Mustela erminea]	Mustela erminea	399	399	1	2e-136	78.98
XP_004779387.1	236	three prime repair exonuclease 2 [Mustela putorius furo]	Mustela putorius furo	154	154	0.7	7e-42	46.9
XP_004760784.1	313	three-prime repair exonuclease 1 [Mustela putorius furo]	Mustela putorius furo	399	399	1	7e-137	78.98
XP_048313487.1	236	three prime repair exonuclease 2 [Myodes glareolus]	Myodes glareolus	151	151	0.7	2e-40	45.58
XP_048278978.1	313	three-prime repair exonuclease 1 [Myodes glareolus]	Myodes glareolus	363	363	1	2e-122	76.19
XP_005886217.1	236	PREDICTED: three prime repair exonuclease 2 [Myotis brandtii]	Myotis brandtii	153	153	0.7	3e-41	45.58
XP_006767008.1	236	PREDICTED: three prime repair exonuclease 2 [Myotis davidii]	Myotis davidii	153	153	0.7	3e-41	45.58
XP_006770637.1	278	PREDICTED: three-prime repair exonuclease 1 [Myotis davidii]	Myotis davidii	323	323	0.99	3e-107	68.17
XP_006087764.1	236	three prime repair exonuclease 2 [Myotis lucifugus]	Myotis lucifugus	153	153	0.7	2e-41	45.58
XP_036161752.1	236	three prime repair exonuclease 2 [Myotis myotis]	Myotis myotis	154	154	0.7	1e-41	45.58
XP_036189557.1	309	three-prime repair exonuclease 1 [Myotis myotis]	Myotis myotis	362	362	1	4e-122	74.52
XP_008827737.1	236	three prime repair exonuclease 2 [Nannospalax galili]	Nannospalax galili	150	150	0.7	5e-40	45.13
XP_008851470.1	312	three-prime repair exonuclease 1 isoform X1 [Nannospalax galili]	Nannospalax galili	402	402	1	4e-138	80.89
XP_008851471.1	274	three-prime repair exonuclease 1 isoform X2 [Nannospalax galili]	Nannospalax galili	309	309	1	6e-102	70.06
XP_018429871.1	221	PREDICTED: three prime repair exonuclease 2 [Nanorana parkeri]	Nanorana parkeri	137	137	0.71	3e-35	41.78
XP_031787436.1	374	uncharacterized protein LOC100114369 isoform X1 [Nasonia vitripennis]	Nasonia vitripennis	57.8	57.8	0.52	1e-05	28.14
XP_031787439.1	350	uncharacterized protein LOC100114369 isoform X2 [Nasonia vitripennis]	Nasonia vitripennis	57.8	57.8	0.52	1e-05	28.14
XP_001630486.3	292	three-prime repair exonuclease 1 [Nematostella vectensis]	Nematostella vectensis	103	103	0.68	1e-21	38.36
XP_046414886.1	321	uncharacterized protein LOC124176973 [Neodiprion fabricii]	Neodiprion fabricii	75.5	75.5	0.5	1e-11	33.95
XP_015521722.1	321	uncharacterized protein LOC107225659 [Neodiprion lecontei]	Neodiprion lecontei	75.5	75.5	0.5	1e-11	33.95
XP_046470724.1	321	uncharacterized protein LOC124213422 [Neodiprion pinetum]	Neodiprion pinetum	75.5	75.5	0.5	1e-11	33.95
XP_046605657.1	327	uncharacterized protein LOC124298101 [Neodiprion virginianus]	Neodiprion virginianus	75.1	75.1	0.5	2e-11	33.95
XP_046608243.1	321	uncharacterized protein LOC124299228 [Neodiprion virginianus]	Neodiprion virginianus	75.9	75.9	0.5	1e-11	33.95
XP_044090590.1	236	three prime repair exonuclease 2 [Neogale vison]	Neogale vison	155	155	0.7	4e-42	46.9
XP_044109569.1	370	three-prime repair exonuclease 1 [Neogale vison]	Neogale vison	398	398	1	1e-135	78.66
XP_021538722.1	236	three prime repair exonuclease 2 [Neomonachus schauinslandi]	Neomonachus schauinslandi	153	153	0.7	3e-41	47.35
XP_021542719.1	314	three-prime repair exonuclease 1 [Neomonachus schauinslandi]	Neomonachus schauinslandi	401	401	1	2e-137	80.25
XP_024611572.1	218	LOW QUALITY PROTEIN: three prime repair exonuclease 2 [Neophocaena asiaeorientalis asiaeorientalis]	Neophocaena asiaeorientalis asiaeorientalis	109	109	0.7	1e-24	38.5
XP_024607157.1	314	three-prime repair exonuclease 1 [Neophocaena asiaeorientalis asiaeorientalis]	Neophocaena asiaeorientalis asiaeorientalis	406	406	1	2e-139	82.8
XP_047421155.1	314	LOW QUALITY PROTEIN: three-prime repair exonuclease 1-like [Neosciurus carolinensis]	Neosciurus carolinensis	408	408	1	3e-140	84.08
XP_047393062.1	236	three prime repair exonuclease 2 [Neosciurus carolinensis]	Neosciurus carolinensis	152	152	0.7	9e-41	46.19
XP_039287163.1	301	uncharacterized protein LOC111053395 isoform X1 [Nilaparvata lugens]	Nilaparvata lugens	80.1	80.1	0.5	2e-13	30.86
XP_022195970.2	366	uncharacterized protein LOC111053395 isoform X2 [Nilaparvata lugens]	Nilaparvata lugens	79.7	79.7	0.5	6e-13	30.86
XP_030662679.1	236	three prime repair exonuclease 2 [Nomascus leucogenys]	Nomascus leucogenys	150	150	0.7	5e-40	45.58
XP_012352527.1	314	three-prime repair exonuclease 1 [Nomascus leucogenys]	Nomascus leucogenys	468	468	1	5e-164	97.45
XP_031826501.1	348	uncharacterized protein LOC116424349 isoform X1 [Nomia melanderi]	Nomia melanderi	58.5	58.5	0.42	7e-06	32.84
XP_031826503.1	342	uncharacterized protein LOC116424349 isoform X2 [Nomia melanderi]	Nomia melanderi	58.9	58.9	0.42	6e-06	32.84
XP_031826504.1	322	uncharacterized protein LOC116424349 isoform X3 [Nomia melanderi]	Nomia melanderi	58.5	58.5	0.42	6e-06	32.84
XP_026531961.1	224	three prime repair exonuclease 2 [Notechis scutatus]	Notechis scutatus	143	143	0.7	1e-37	42.08
XP_029166147.1	327	uncharacterized protein LOC114936954 [Nylanderia fulva]	Nylanderia fulva	61.6	61.6	0.46	8e-07	31.76
XP_040830502.1	301	three prime repair exonuclease 2 [Ochotona curzoniae]	Ochotona curzoniae	154	154	0.7	6e-41	45.13
XP_040850346.1	311	three-prime repair exonuclease 1 [Ochotona curzoniae]	Ochotona curzoniae	365	365	0.9	2e-123	77.46
XP_004598948.1	233	three prime repair exonuclease 2 [Ochotona princeps]	Ochotona princeps	155	155	0.7	5e-42	45.13
XP_004581799.1	312	three-prime repair exonuclease 1 [Ochotona princeps]	Ochotona princeps	367	367	0.9	3e-124	76.76
XP_004645186.1	236	three prime repair exonuclease 2 [Octodon degus]	Octodon degus	157	157	0.7	7e-43	46.19
XP_004642200.1	313	three-prime repair exonuclease 1 [Octodon degus]	Octodon degus	375	375	1	4e-127	78.98
XP_014784354.1	321	PREDICTED: three-prime repair exonuclease 1-like [Octopus bimaculoides]	Octopus bimaculoides	85.5	144	0.67	4e-15	41.29
XP_029658271.1	324	three-prime repair exonuclease 1 [Octopus sinensis]	Octopus sinensis	89.7	150	0.67	1e-16	43.23
XP_004409210.1	236	PREDICTED: three prime repair exonuclease 2 [Odobenus rosmarus divergens]	Odobenus rosmarus divergens	150	150	0.7	3e-40	46.46
XP_004399250.1	314	PREDICTED: three-prime repair exonuclease 1 [Odobenus rosmarus divergens]	Odobenus rosmarus divergens	404	404	1	2e-138	80.57
XP_020741097.1	236	three prime repair exonuclease 2 [Odocoileus virginianus texanus]	Odocoileus virginianus texanus	152	152	0.7	8e-41	46.02
XP_020771641.1	355	three-prime repair exonuclease 1 [Odocoileus virginianus texanus]	Odocoileus virginianus texanus	361	361	1	4e-121	78.41
XP_032672692.1	338	exonuclease DPD1, chloroplastic/mitochondrial [Odontomachus brunneus]	Odontomachus brunneus	58.5	58.5	0.47	8e-06	33.99
XP_022899993.1	338	uncharacterized protein LOC111413303 isoform X1 [Onthophagus taurus]	Onthophagus taurus	76.3	76.3	0.49	8e-12	32.91
XP_022900002.1	283	uncharacterized protein LOC111413303 isoform X2 [Onthophagus taurus]	Onthophagus taurus	60.5	60.5	0.32	1e-06	35.58
XP_036031043.1	236	three prime repair exonuclease 2 [Onychomys torridus]	Onychomys torridus	143	143	0.7	2e-37	43.81
XP_036050119.1	313	three-prime repair exonuclease 1 [Onychomys torridus]	Onychomys torridus	356	356	1	1e-119	76.83
XP_011346576.1	332	uncharacterized protein LOC105284614 [Ooceraea biroi]	Ooceraea biroi	51.2	51.2	0.46	0.002	33.33
XP_009172231.1	303	hypothetical protein T265_08224 [Opisthorchis viverrini]	Opisthorchis viverrini	108	108	0.71	1e-23	28.96
XP_020630615.1	218	three prime repair exonuclease 2-like [Orbicella faveolata]	Orbicella faveolata	101	101	0.66	1e-21	31.96
XP_004286912.1	215	LOW QUALITY PROTEIN: three prime repair exonuclease 2 [Orcinus orca]	Orcinus orca	98.6	98.6	0.7	1e-20	35.24
XP_004283946.1	314	three-prime repair exonuclease 1 [Orcinus orca]	Orcinus orca	410	410	1	4e-141	83.12
XP_028923388.1	240	three prime repair exonuclease 2 [Ornithorhynchus anatinus]	Ornithorhynchus anatinus	161	161	0.7	2e-44	43.81
XP_028906636.1	340	three-prime repair exonuclease 1 isoform X1 [Ornithorhynchus anatinus]	Ornithorhynchus anatinus	246	246	0.71	3e-76	58.87
XP_028906637.1	335	three-prime repair exonuclease 1 isoform X2 [Ornithorhynchus anatinus]	Ornithorhynchus anatinus	246	246	0.71	2e-76	58.87
XP_012279180.1	229	three prime repair exonuclease 2 [Orussus abietinus]	Orussus abietinus	59.7	59.7	0.7	2e-06	30.04
XP_012282260.1	215	three-prime repair exonuclease 1 isoform X2 [Orussus abietinus]	Orussus abietinus	70.1	70.1	0.69	3e-10	29.09
XP_012282259.1	345	uncharacterized protein LOC105700709 isoform X1 [Orussus abietinus]	Orussus abietinus	56.6	56.6	0.5	4e-05	30.82
XP_007955393.1	236	three prime repair exonuclease 2 [Orycteropus afer afer]	Orycteropus afer afer	152	152	0.7	4e-41	45.13
XP_007953481.1	314	three-prime repair exonuclease 1 [Orycteropus afer afer]	Orycteropus afer afer	358	358	1	2e-120	78.66
XP_008248553.1	236	PREDICTED: LOW QUALITY PROTEIN: three prime repair exonuclease 2 [Oryctolagus cuniculus]	Oryctolagus cuniculus	159	159	0.7	1e-43	46.9
XP_008258825.1	322	PREDICTED: three-prime repair exonuclease 1 isoform X1 [Oryctolagus cuniculus]	Oryctolagus cuniculus	392	392	1	5e-134	79.3
XP_002713390.2	314	PREDICTED: three-prime repair exonuclease 1 isoform X2 [Oryctolagus cuniculus]	Oryctolagus cuniculus	392	392	1	4e-134	79.3
XP_040121491.1	236	three prime repair exonuclease 2 [Oryx dammah]	Oryx dammah	148	148	0.7	2e-39	45.58
XP_040102938.1	315	three-prime repair exonuclease 1 [Oryx dammah]	Oryx dammah	355	355	1	4e-119	76.19
XP_029044638.2	342	uncharacterized protein LOC114876898 isoform X1 [Osmia bicornis bicornis]	Osmia bicornis bicornis	62.4	62.4	0.62	4e-07	33.33
XP_029044641.2	328	uncharacterized protein LOC114876898 isoform X2 [Osmia bicornis bicornis]	Osmia bicornis bicornis	62.4	62.4	0.62	3e-07	33.33
XP_034191406.1	340	uncharacterized protein LOC117609325 isoform X1 [Osmia lignaria]	Osmia lignaria	60.8	60.8	0.42	1e-06	38.06
XP_034191414.1	326	uncharacterized protein LOC117609325 isoform X2 [Osmia lignaria]	Osmia lignaria	60.8	60.8	0.42	1e-06	38.06
XP_028164963.1	298	uncharacterized protein LOC114356077 [Ostrinia furnacalis]	Ostrinia furnacalis	57	57	0.5	2e-05	30.54
XP_028166870.1	325	uncharacterized protein LOC114357456 [Ostrinia furnacalis]	Ostrinia furnacalis	62.8	62.8	0.62	3e-07	29.29
XP_012668646.1	236	three prime repair exonuclease 2 [Otolemur garnettii]	Otolemur garnettii	150	150	0.7	4e-40	45.13
XP_003800608.1	314	three-prime repair exonuclease 1 [Otolemur garnettii]	Otolemur garnettii	405	405	1	6e-139	83.12
XP_004022715.2	261	three prime repair exonuclease 2 isoform X1 [Ovis aries]	Ovis aries	144	144	0.7	1e-37	45.13
XP_042098489.1	236	three prime repair exonuclease 2 isoform X2 [Ovis aries]	Ovis aries	144	144	0.7	8e-38	45.13
XP_004023447.4	315	three-prime repair exonuclease 1 [Ovis aries]	Ovis aries	360	360	1	2e-121	78.73
WP_189536339.1	244	exonuclease domain-containing protein [Paludibacterium paludis]	Paludibacterium paludis	50.4	50.4	0.45	0.002	30.2
WP_028535486.1	243	3'-5' exonuclease [Paludibacterium yongneupense]	Paludibacterium yongneupense	54.3	54.3	0.45	0.0001	30.87
XP_008962537.1	236	three prime repair exonuclease 2 [Pan paniscus]	Pan paniscus	151	151	0.7	1e-40	46.02
XP_008969971.1	374	three-prime repair exonuclease 1 [Pan paniscus]	Pan paniscus	467	467	1	2e-162	98.73
XP_024211226.1	336	three-prime repair exonuclease 1 isoform X1 [Pan troglodytes]	Pan troglodytes	406	406	0.91	3e-139	98.25
XP_024211227.1	314	three-prime repair exonuclease 1 isoform X2 [Pan troglodytes]	Pan troglodytes	466	466	1	4e-163	98.41
XP_042785173.1	314	three-prime repair exonuclease 1 [Panthera leo]	Panthera leo	401	401	1	1e-137	81.21
XP_019293283.1	236	PREDICTED: three prime repair exonuclease 2 [Panthera pardus]	Panthera pardus	154	154	0.7	1e-41	46.46
XP_019272252.1	314	PREDICTED: three-prime repair exonuclease 1 [Panthera pardus]	Panthera pardus	404	404	1	1e-138	81.53
XP_015398979.2	236	three prime repair exonuclease 2 [Panthera tigris]	Panthera tigris	153	153	0.7	2e-41	46.46
XP_042834790.1	314	three-prime repair exonuclease 1 [Panthera tigris]	Panthera tigris	403	403	1	3e-138	81.21
XP_034290148.1	224	three prime repair exonuclease 2 [Pantherophis guttatus]	Pantherophis guttatus	147	147	0.71	5e-39	40.71
XP_014363818.2	291	three-prime repair exonuclease 1 [Papilio machaon]	Papilio machaon	82.8	82.8	0.52	3e-14	35.12
XP_013138234.1	289	PREDICTED: three-prime repair exonuclease 1-like [Papilio polytes]	Papilio polytes	77.8	77.8	0.52	1e-12	35.5
XP_013144787.1	328	PREDICTED: uncharacterized protein LOC106108232 [Papilio polytes]	Papilio polytes	67.4	67.4	0.55	9e-09	31.64
XP_013182572.1	290	PREDICTED: three-prime repair exonuclease 1-like [Papilio xuthus]	Papilio xuthus	80.9	80.9	0.52	1e-13	34.32
XP_013182110.1	334	PREDICTED: uncharacterized protein LOC106128331 [Papilio xuthus]	Papilio xuthus	67.8	67.8	0.5	6e-09	32.93
XP_009196747.1	236	three prime repair exonuclease 2 [Papio anubis]	Papio anubis	152	152	0.7	5e-41	46.46
XP_021790135.2	474	three-prime repair exonuclease 1 [Papio anubis]	Papio anubis	448	448	1	1e-153	94.9
XP_039750846.1	275	three-prime repair exonuclease 1-like [Pararge aegeria]	Pararge aegeria	82	82	0.54	4e-14	31.4
XP_039749296.1	303	uncharacterized protein LOC120626072 [Pararge aegeria]	Pararge aegeria	68.2	68.2	0.53	4e-09	29.07
XP_015904740.1	385	three-prime repair exonuclease 1 [Parasteatoda tepidariorum]	Parasteatoda tepidariorum	110	110	0.71	1e-23	32.35
XP_015930657.2	429	uncharacterized protein LOC107457102 isoform X1 [Parasteatoda tepidariorum]	Parasteatoda tepidariorum	94.4	150	0.67	8e-18	41.4
XP_015930659.2	420	uncharacterized protein LOC107457102 isoform X2 [Parasteatoda tepidariorum]	Parasteatoda tepidariorum	94.7	151	0.67	6e-18	41.4
XP_038046422.1	247	three prime repair exonuclease 2-like [Patiria miniata]	Patiria miniata	137	137	0.76	7e-35	36.18
XP_038046421.1	255	three prime repair exonuclease 2-like [Patiria miniata]	Patiria miniata	136	136	0.71	1e-34	37.77
XP_033732749.1	220	three-prime repair exonuclease 1-like [Pecten maximus]	Pecten maximus	51.2	51.2	0.35	0.001	30.09
XP_002432389.1	289	conserved hypothetical protein [Pediculus humanus corporis]	Pediculus humanus corporis	84	84	0.53	9e-15	33.93
XP_025044318.1	247	three prime repair exonuclease 2-like [Pelodiscus sinensis]	Pelodiscus sinensis	123	123	0.67	1e-29	39.44
XP_047500368.1	380	uncharacterized protein LOC125046601 [Penaeus chinensis]	Penaeus chinensis	75.9	75.9	0.48	2e-11	34.71
XP_042862328.1	410	three-prime repair exonuclease 1-like [Penaeus japonicus]	Penaeus japonicus	73.6	125	0.71	1e-10	33.33
XP_037796114.1	406	uncharacterized protein LOC119591445 [Penaeus monodon]	Penaeus monodon	75.5	75.5	0.49	2e-11	34.3
XP_027210390.1	404	uncharacterized protein LOC113803765 [Penaeus vannamei]	Penaeus vannamei	75.5	125	0.71	2e-11	33.33
XP_048192783.1	236	three prime repair exonuclease 2 [Perognathus longimembris pacificus]	Perognathus longimembris pacificus	149	149	0.7	8e-40	47.35
XP_048190559.1	317	three-prime repair exonuclease 1 [Perognathus longimembris pacificus]	Perognathus longimembris pacificus	342	342	0.76	3e-114	79.67
XP_028744411.1	236	three prime repair exonuclease 2 [Peromyscus leucopus]	Peromyscus leucopus	143	143	0.7	2e-37	43.81
XP_028742756.1	313	three-prime repair exonuclease 1 [Peromyscus leucopus]	Peromyscus leucopus	363	363	1	2e-122	76.19
XP_042124830.1	236	three prime repair exonuclease 2 [Peromyscus maniculatus bairdii]	Peromyscus maniculatus bairdii	143	143	0.7	1e-37	43.81
XP_006978349.2	313	three-prime repair exonuclease 1 [Peromyscus maniculatus bairdii]	Peromyscus maniculatus bairdii	362	362	1	4e-122	76.51
XP_032827327.1	340	three prime repair exonuclease 2-like [Petromyzon marinus]	Petromyzon marinus	121	121	0.73	4e-28	35.4
XP_032827238.1	378	three prime repair exonuclease 2-like [Petromyzon marinus]	Petromyzon marinus	140	140	0.72	7e-35	37.45
XP_047620059.1	236	three prime repair exonuclease 2 [Phacochoerus africanus]	Phacochoerus africanus	149	149	0.7	8e-40	45.13
XP_047629439.1	314	three-prime repair exonuclease 1-like [Phacochoerus africanus]	Phacochoerus africanus	404	404	1	1e-138	82.48
XP_020832898.1	241	three prime repair exonuclease 2 [Phascolarctos cinereus]	Phascolarctos cinereus	155	155	0.74	5e-42	42.44
XP_020854878.1	325	three-prime repair exonuclease 1 [Phascolarctos cinereus]	Phascolarctos cinereus	268	268	0.74	3e-85	64.41
XP_032253431.1	269	three prime repair exonuclease 2 [Phoca vitulina]	Phoca vitulina	151	151	0.7	4e-40	47.35
XP_032268563.1	314	three-prime repair exonuclease 1 [Phoca vitulina]	Phoca vitulina	404	404	1	8e-139	81.53
XP_032476855.1	218	LOW QUALITY PROTEIN: three prime repair exonuclease 2 [Phocoena sinus]	Phocoena sinus	108	108	0.7	1e-24	38.5
XP_031346888.1	309	three-prime repair exonuclease 1 [Photinus pyralis]	Photinus pyralis	86.7	86.7	0.49	2e-15	35.85
XP_028377983.1	236	three prime repair exonuclease 2 [Phyllostomus discolor]	Phyllostomus discolor	150	150	0.7	4e-40	45.29
XP_028374337.1	314	three-prime repair exonuclease 1 [Phyllostomus discolor]	Phyllostomus discolor	372	372	1	6e-126	79.94
XP_045712843.1	1039	ATR-interacting protein [Phyllostomus hastatus]	Phyllostomus hastatus	233	233	0.63	6e-66	75.5
XP_045701411.1	236	three prime repair exonuclease 2 [Phyllostomus hastatus]	Phyllostomus hastatus	147	147	0.7	7e-39	44.84
XP_028337974.1	249	LOW QUALITY PROTEIN: three prime repair exonuclease 2 [Physeter catodon]	Physeter catodon	83.6	83.6	0.56	7e-15	39.44
XP_028341225.1	267	three-prime repair exonuclease 1 [Physeter catodon]	Physeter catodon	339	339	0.67	8e-114	90.61
XP_045525113.1	283	three-prime repair exonuclease 1-like [Pieris brassicae]	Pieris brassicae	76.3	76.3	0.55	5e-12	32.61
XP_045524937.1	394	uncharacterized protein LOC123714628 isoform X1 [Pieris brassicae]	Pieris brassicae	63.9	63.9	0.55	1e-07	32.2
XP_047520105.1	293	uncharacterized protein LOC125059642 [Pieris napi]	Pieris napi	60.8	60.8	0.45	9e-07	33.79
XP_047520475.1	282	uncharacterized protein LOC125059874 [Pieris napi]	Pieris napi	76.3	76.3	0.49	4e-12	35.4
XP_022116301.1	282	three-prime repair exonuclease 1 [Pieris rapae]	Pieris rapae	80.1	80.1	0.49	2e-13	34.59
XP_022116321.1	297	three-prime repair exonuclease 1-like [Pieris rapae]	Pieris rapae	66.2	114	0.69	2e-08	35.86
XP_023057869.1	236	three prime repair exonuclease 2 [Piliocolobus tephrosceles]	Piliocolobus tephrosceles	153	153	0.7	2e-41	46.46
XP_023087195.1	314	three-prime repair exonuclease 1 [Piliocolobus tephrosceles]	Piliocolobus tephrosceles	455	455	1	9e-159	96.18
XP_036285871.1	236	three prime repair exonuclease 2 [Pipistrellus kuhlii]	Pipistrellus kuhlii	154	154	0.7	2e-41	46.46
XP_036288246.1	302	three-prime repair exonuclease 1 [Pipistrellus kuhlii]	Pipistrellus kuhlii	306	306	0.99	2e-100	72.2
XP_011560520.3	306	uncharacterized protein LOC105390855 [Plutella xylostella]	Plutella xylostella	58.5	58.5	0.5	7e-06	30.62
XP_037965427.2	333	uncharacterized protein LOC119691652 [Plutella xylostella]	Plutella xylostella	68.9	116	0.67	2e-09	32.03
XP_027058412.1	291	three prime repair exonuclease 2-like [Pocillopora damicornis]	Pocillopora damicornis	87.8	87.8	0.67	5e-16	32.16
XP_028567900.1	320	three prime repair exonuclease 2-like isoform X1 [Podarcis muralis]	Podarcis muralis	145	145	0.71	3e-37	41.7
XP_028567901.1	290	three prime repair exonuclease 2-like isoform X2 [Podarcis muralis]	Podarcis muralis	143	143	0.71	6e-37	41.7
XP_028574669.1	335	three-prime repair exonuclease 1 [Podarcis muralis]	Podarcis muralis	195	195	0.72	2e-56	49.36
XP_020648734.1	225	three prime repair exonuclease 2 [Pogona vitticeps]	Pogona vitticeps	154	154	0.72	1e-41	42.79
XP_020652364.1	403	three prime repair exonuclease 2-like isoform X1 [Pogona vitticeps]	Pogona vitticeps	188	188	0.72	4e-53	46.81
XP_020652365.1	367	three prime repair exonuclease 2-like isoform X2 [Pogona vitticeps]	Pogona vitticeps	151	151	0.72	3e-39	40
XP_020652366.1	320	three prime repair exonuclease 2-like isoform X3 [Pogona vitticeps]	Pogona vitticeps	189	189	0.75	4e-54	44.72
XP_014601303.1	230	PREDICTED: three prime repair exonuclease 2 isoform X1 [Polistes canadensis]	Polistes canadensis	62.8	62.8	0.7	1e-07	26.14
XP_014601304.1	208	PREDICTED: three prime repair exonuclease 2 isoform X2 [Polistes canadensis]	Polistes canadensis	48.9	48.9	0.36	0.005	22.9
XP_015183516.1	230	PREDICTED: three-prime repair exonuclease 1 [Polistes dominula]	Polistes dominula	72.4	72.4	0.7	5e-11	27.31
XP_043503421.1	229	three prime repair exonuclease 2 [Polistes fuscatus]	Polistes fuscatus	66.6	66.6	0.68	6e-09	27.47
XP_041129770.1	257	three prime repair exonuclease 2-like [Polyodon spathula]	Polyodon spathula	145	145	0.71	3e-38	45.37
XP_039631663.1	261	three prime repair exonuclease 2-like [Polypterus senegalus]	Polypterus senegalus	153	153	0.71	6e-41	42.92
XP_025113385.1	511	uncharacterized protein LOC112575626 [Pomacea canaliculata]	Pomacea canaliculata	81.3	81.3	0.48	4e-13	36.94
XP_009233676.1	236	three prime repair exonuclease 2 [Pongo abelii]	Pongo abelii	149	149	0.7	9e-40	46.02
XP_002813830.1	314	three-prime repair exonuclease 1 [Pongo abelii]	Pongo abelii	465	465	1	7e-163	98.09
XP_045119709.1	412	uncharacterized protein LOC123509481 [Portunus trituberculatus]	Portunus trituberculatus	78.2	78.2	0.51	2e-12	32.98
XP_043427343.1	236	three prime repair exonuclease 2 [Prionailurus bengalensis]	Prionailurus bengalensis	150	150	0.7	5e-40	45.58
XP_047703444.1	236	three prime repair exonuclease 2 [Prionailurus viverrinus]	Prionailurus viverrinus	149	149	0.7	6e-40	45.58
XP_047696628.1	314	three-prime repair exonuclease 1-like [Prionailurus viverrinus]	Prionailurus viverrinus	400	400	1	3e-137	81.53
XP_045613516.1	394	uncharacterized protein LOC123767682 [Procambarus clarkii]	Procambarus clarkii	88.6	88.6	0.49	7e-16	34.94
XP_012517510.1	236	PREDICTED: three prime repair exonuclease 2 [Propithecus coquereli]	Propithecus coquereli	149	149	0.7	7e-40	45.13
XP_012503813.1	314	PREDICTED: three-prime repair exonuclease 1 [Propithecus coquereli]	Propithecus coquereli	402	402	1	5e-138	86.62
XP_015667743.1	223	three prime repair exonuclease 2 [Protobothrops mucrosquamatus]	Protobothrops mucrosquamatus	139	139	0.71	6e-36	40.44
XP_043916401.1	250	three prime repair exonuclease 2 [Protopterus annectens]	Protopterus annectens	133	133	0.75	2e-33	39.75
XP_043934847.1	274	three prime repair exonuclease 2-like [Protopterus annectens]	Protopterus annectens	174	174	0.71	5e-49	42.48
XP_043934845.1	338	three-prime repair exonuclease 1-like [Protopterus annectens]	Protopterus annectens	169	169	0.7	4e-46	42.54
XP_026567139.1	224	three prime repair exonuclease 2 [Pseudonaja textilis]	Pseudonaja textilis	138	138	0.7	9e-36	41.18
XP_006915329.1	236	three prime repair exonuclease 2 [Pteropus alecto]	Pteropus alecto	150	150	0.7	3e-40	45.29
XP_006909117.1	314	three-prime repair exonuclease 1 [Pteropus alecto]	Pteropus alecto	392	392	1	9e-134	80.57
XP_039693602.1	314	three-prime repair exonuclease 1 [Pteropus giganteus]	Pteropus giganteus	389	389	1	1e-132	80.89
XP_011373820.1	236	three prime repair exonuclease 2 [Pteropus vampyrus]	Pteropus vampyrus	152	152	0.7	4e-41	45.58
XP_011373670.1	314	three-prime repair exonuclease 1 [Pteropus vampyrus]	Pteropus vampyrus	389	389	1	8e-133	80.89
XP_025790156.1	236	three prime repair exonuclease 2 [Puma concolor]	Puma concolor	152	152	0.7	7e-41	46.02
XP_025772236.1	314	three-prime repair exonuclease 1 [Puma concolor]	Puma concolor	403	403	1	3e-138	81.85
XP_040323442.1	236	three prime repair exonuclease 2 [Puma yagouaroundi]	Puma yagouaroundi	151	151	0.7	2e-40	45.58
XP_025021424.1	259	three prime repair exonuclease 2 isoform X1 [Python bivittatus]	Python bivittatus	143	143	0.71	3e-37	40
XP_007420588.1	225	three prime repair exonuclease 2 isoform X2 [Python bivittatus]	Python bivittatus	143	143	0.71	1e-37	40
XP_040178791.1	220	three prime repair exonuclease 2-like [Rana temporaria]	Rana temporaria	142	142	0.71	3e-37	41.78
XP_040178792.1	221	three prime repair exonuclease 2-like [Rana temporaria]	Rana temporaria	149	149	0.71	6e-40	42.22
NP_001101050.1	236	three prime repair exonuclease 2 [Rattus norvegicus]	Rattus norvegicus	149	149	0.7	1e-39	44.69
NP_001020160.1	316	three-prime repair exonuclease 1 [Rattus norvegicus]	Rattus norvegicus	353	353	1	2e-118	72.78
XP_032746357.1	236	three prime repair exonuclease 2 [Rattus rattus]	Rattus rattus	147	147	0.7	3e-39	44.69
XP_032766590.1	316	three-prime repair exonuclease 1 [Rattus rattus]	Rattus rattus	350	350	1	2e-117	73.19
XP_036321186.1	365	uncharacterized protein LOC118735497 [Rhagoletis pomonella]	Rhagoletis pomonella	69.3	116	0.69	2e-09	35.53
XP_017477346.1	365	PREDICTED: uncharacterized protein LOC108367268 [Rhagoletis zephyria]	Rhagoletis zephyria	68.6	116	0.69	4e-09	35.53
XP_029441554.1	243	three prime repair exonuclease 2-like [Rhinatrema bivittatum]	Rhinatrema bivittatum	155	155	0.71	4e-42	43.61
XP_029455257.1	366	three-prime repair exonuclease 1-like isoform X1 [Rhinatrema bivittatum]	Rhinatrema bivittatum	187	187	0.76	8e-53	45.56
XP_029455258.1	329	three-prime repair exonuclease 1-like isoform X2 [Rhinatrema bivittatum]	Rhinatrema bivittatum	187	187	0.76	1e-53	45.56
XP_032965295.1	236	three prime repair exonuclease 2 [Rhinolophus ferrumequinum]	Rhinolophus ferrumequinum	152	152	0.7	4e-41	46.9
XP_032988942.1	314	three-prime repair exonuclease 1 [Rhinolophus ferrumequinum]	Rhinolophus ferrumequinum	384	384	1	1e-130	78.66
XP_019610697.1	236	PREDICTED: three prime repair exonuclease 2 [Rhinolophus sinicus]	Rhinolophus sinicus	153	153	0.7	3e-41	46.9
XP_019579503.1	313	PREDICTED: three-prime repair exonuclease 1 [Rhinolophus sinicus]	Rhinolophus sinicus	387	387	0.99	4e-132	79.87
XP_010360063.2	253	three prime repair exonuclease 2 isoform X1 [Rhinopithecus roxellana]	Rhinopithecus roxellana	153	153	0.7	3e-41	46.46
XP_010360064.2	236	three prime repair exonuclease 2 isoform X2 [Rhinopithecus roxellana]	Rhinopithecus roxellana	153	153	0.7	3e-41	46.46
XP_010368722.1	314	three-prime repair exonuclease 1 [Rhinopithecus roxellana]	Rhinopithecus roxellana	459	459	1	2e-160	96.18
XP_037269290.1	308	three-prime repair exonuclease 1-like isoform X1 [Rhipicephalus microplus]	Rhipicephalus microplus	97.4	97.4	0.67	2e-19	28.95
XP_037269284.1	327	uncharacterized protein LOC119161059 isoform X1 [Rhipicephalus microplus]	Rhipicephalus microplus	79.3	79.3	0.56	7e-13	35.52
XP_037269286.1	300	uncharacterized protein LOC119161059 isoform X2 [Rhipicephalus microplus]	Rhipicephalus microplus	63.5	63.5	0.52	1e-07	33.73
XP_037269291.1	295	uncharacterized protein LOC119161062 isoform X2 [Rhipicephalus microplus]	Rhipicephalus microplus	73.9	73.9	0.4	4e-11	36.43
XP_037504814.1	311	three-prime repair exonuclease 1 [Rhipicephalus sanguineus]	Rhipicephalus sanguineus	105	105	0.69	2e-22	31.06
XP_037503600.1	330	uncharacterized protein LOC119378590 [Rhipicephalus sanguineus]	Rhipicephalus sanguineus	81.6	81.6	0.5	1e-13	37.35
XP_015988594.2	236	three prime repair exonuclease 2 [Rousettus aegyptiacus]	Rousettus aegyptiacus	152	152	0.7	4e-41	45.58
XP_016005329.1	397	three-prime repair exonuclease 1 isoform X1 [Rousettus aegyptiacus]	Rousettus aegyptiacus	362	362	1	4e-121	80.25
XP_016005330.1	314	three-prime repair exonuclease 1 isoform X2 [Rousettus aegyptiacus]	Rousettus aegyptiacus	365	365	1	3e-123	80.25
XP_006824670.1	260	PREDICTED: three prime repair exonuclease 1-like [Saccoglossus kowalevskii]	Saccoglossus kowalevskii	112	112	0.64	1e-25	36.27
XP_002736377.1	261	PREDICTED: three prime repair exonuclease 1-like [Saccoglossus kowalevskii]	Saccoglossus kowalevskii	106	106	0.7	3e-23	36.28
XP_002737131.1	598	PREDICTED: uncharacterized protein LOC100371579 [Saccoglossus kowalevskii]	Saccoglossus kowalevskii	115	115	0.7	7e-25	35.62
XP_010330063.1	236	three prime repair exonuclease 2 [Saimiri boliviensis boliviensis]	Saimiri boliviensis boliviensis	151	151	0.71	1e-40	45.61
XP_010335364.1	314	three-prime repair exonuclease 1 [Saimiri boliviensis boliviensis]	Saimiri boliviensis boliviensis	427	427	1	8e-148	90.45
XP_032121084.1	236	three prime repair exonuclease 2 [Sapajus apella]	Sapajus apella	149	149	0.71	7e-40	45.18
XP_032145606.1	374	three-prime repair exonuclease 1 [Sapajus apella]	Sapajus apella	429	429	1	1e-147	90.76
XP_003775130.1	240	three prime repair exonuclease 2 [Sarcophilus harrisii]	Sarcophilus harrisii	154	154	0.73	8e-42	41.81
XP_031817059.1	325	three-prime repair exonuclease 1 [Sarcophilus harrisii]	Sarcophilus harrisii	280	280	0.74	7e-90	68.22
XP_030377036.1	350	three prime repair exonuclease 2 [Scaptodrosophila lebanonensis]	Scaptodrosophila lebanonensis	59.7	59.7	0.47	3e-06	34.42
XP_042310355.1	229	three prime repair exonuclease 2-like [Sceloporus undulatus]	Sceloporus undulatus	142	142	0.72	4e-37	38.86
XP_042303411.1	374	three-prime repair exonuclease 1 [Sceloporus undulatus]	Sceloporus undulatus	184	184	0.72	1e-51	45.11
XP_046996896.1	381	uncharacterized protein LOC124612640 [Schistocerca americana]	Schistocerca americana	80.9	80.9	0.48	3e-13	35.03
XP_047115005.1	336	three-prime repair exonuclease 1-like [Schistocerca piceifrons]	Schistocerca piceifrons	81.3	81.3	0.48	2e-13	35.03
XP_047114780.1	359	uncharacterized protein LOC124795040 [Schistocerca piceifrons]	Schistocerca piceifrons	83.6	135	0.7	3e-14	36.94
XP_012798320.1	306	uncharacterized protein MS3_0016618 [Schistosoma haematobium]	Schistosoma haematobium	115	115	0.74	6e-26	30.15
XP_018649895.1	301	hypothetical protein Smp_146310 [Schistosoma mansoni]	Schistosoma mansoni	112	112	0.74	5e-25	29.41
XP_030750888.1	337	uncharacterized protein LOC115878495 isoform X1 [Sitophilus oryzae]	Sitophilus oryzae	88.6	88.6	0.48	4e-16	35.26
XP_030750889.1	322	uncharacterized protein LOC115878495 isoform X2 [Sitophilus oryzae]	Sitophilus oryzae	88.6	88.6	0.48	3e-16	35.26
XP_004606578.1	236	PREDICTED: three prime repair exonuclease 2 [Sorex araneus]	Sorex araneus	150	150	0.71	5e-40	46.26
XP_004615332.1	315	PREDICTED: three-prime repair exonuclease 1 [Sorex araneus]	Sorex araneus	385	385	1	2e-131	78.41
XP_048343657.1	229	three prime repair exonuclease 2 [Sphaerodactylus townsendi]	Sphaerodactylus townsendi	154	154	0.71	6e-42	42.92
XP_048345595.1	330	three-prime repair exonuclease 1-like [Sphaerodactylus townsendi]	Sphaerodactylus townsendi	195	195	0.72	2e-56	45.49
XP_035451464.1	317	exonuclease DPD1, chloroplastic/mitochondrial-like [Spodoptera frugiperda]	Spodoptera frugiperda	84.3	84.3	0.5	1e-14	35.62
XP_035443472.1	206	three prime repair exonuclease 2-like [Spodoptera frugiperda]	Spodoptera frugiperda	70.1	70.1	0.71	2e-10	27.83
XP_035430183.1	206	three prime repair exonuclease 2-like [Spodoptera frugiperda]	Spodoptera frugiperda	48.9	48.9	0.33	0.006	26.67
XP_035445133.1	258	three prime repair exonuclease 2-like [Spodoptera frugiperda]	Spodoptera frugiperda	49.7	49.7	0.5	0.004	31.25
XP_035452058.1	288	three prime repair exonuclease 2-like [Spodoptera frugiperda]	Spodoptera frugiperda	80.5	80.5	0.47	2e-13	34.21
XP_035452542.1	291	three prime repair exonuclease 2-like [Spodoptera frugiperda]	Spodoptera frugiperda	76.6	76.6	0.48	4e-12	33.76
XP_035451475.1	317	uncharacterized protein LOC118276949 [Spodoptera frugiperda]	Spodoptera frugiperda	84.3	84.3	0.5	1e-14	35.62
XP_022828501.1	316	exonuclease DPD1, chloroplastic/mitochondrial-like [Spodoptera litura]	Spodoptera litura	81.3	81.3	0.48	1e-13	37.42
XP_022829719.1	212	three prime repair exonuclease 2-like [Spodoptera litura]	Spodoptera litura	54.3	54.3	0.37	8e-05	27.48
XP_022824661.1	246	three prime repair exonuclease 2-like [Spodoptera litura]	Spodoptera litura	60.1	60.1	0.67	1e-06	25.51
XP_022830327.1	256	three prime repair exonuclease 2-like [Spodoptera litura]	Spodoptera litura	49.3	49.3	0.48	0.006	29.87
XP_022818522.1	330	uncharacterized protein LOC111350997 [Spodoptera litura]	Spodoptera litura	74.7	74.7	0.48	3e-11	34.42
XP_035211838.1	319	three-prime repair exonuclease 1-like [Stegodyphus dumicola]	Stegodyphus dumicola	126	126	0.71	3e-30	34.75
XP_035209122.1	406	three-prime repair exonuclease 1-like [Stegodyphus dumicola]	Stegodyphus dumicola	86.3	146	0.71	4e-15	33.17
XP_013106408.1	345	PREDICTED: uncharacterized protein LOC106086324 [Stomoxys calcitrans]	Stomoxys calcitrans	52.4	52.4	0.63	0.0008	26.03
XP_011670344.2	433	LOW QUALITY PROTEIN: three-prime repair exonuclease 1-like [Strongylocentrotus purpuratus]	Strongylocentrotus purpuratus	65.5	122	0.58	5e-08	35.34
XP_011670342.2	303	three prime repair exonuclease 2-like [Strongylocentrotus purpuratus]	Strongylocentrotus purpuratus	117	117	0.71	7e-27	30.11
XP_030853094.1	357	uncharacterized protein LOC115929080 [Strongylocentrotus purpuratus]	Strongylocentrotus purpuratus	68.2	129	0.51	5e-09	41
XP_030853095.1	875	uncharacterized protein LOC755651 [Strongylocentrotus purpuratus]	Strongylocentrotus purpuratus	86.7	274	0.67	7e-15	35.62
XP_036915126.1	236	three prime repair exonuclease 2 [Sturnira hondurensis]	Sturnira hondurensis	145	145	0.7	3e-38	44.39
XP_036905712.1	314	three-prime repair exonuclease 1 [Sturnira hondurensis]	Sturnira hondurensis	391	391	1	2e-133	80.89
XP_039263230.1	167	three-prime repair exonuclease 1-like [Styela clava]	Styela clava	60.5	60.5	0.46	3e-07	27.21
XP_039247993.1	276	three-prime repair exonuclease 1-like [Styela clava]	Styela clava	87.4	87.4	0.71	5e-16	29.06
XP_039263029.1	328	three-prime repair exonuclease 1-like [Styela clava]	Styela clava	90.9	90.9	0.69	6e-17	28.51
XP_039256974.1	475	uncharacterized protein LOC120333709 [Styela clava]	Styela clava	98.2	160	0.68	5e-19	31.96
XP_022791193.1	285	three prime repair exonuclease 2-like [Stylophora pistillata]	Stylophora pistillata	96.7	96.7	0.67	2e-19	33.48
WP_162083939.1	243	3'-5' exonuclease [Sulfuriferula nivalis]	Sulfuriferula nivalis	56.6	56.6	0.45	2e-05	33.56
XP_029785916.1	236	three prime repair exonuclease 2 [Suricata suricatta]	Suricata suricatta	151	151	0.7	1e-40	46.46
XP_029775003.1	314	three-prime repair exonuclease 1 [Suricata suricatta]	Suricata suricatta	394	394	1	1e-134	81.85
XP_020935615.1	236	three prime repair exonuclease 2 [Sus scrofa]	Sus scrofa	149	149	0.7	8e-40	45.13
XP_020926287.1	314	three-prime repair exonuclease 1 [Sus scrofa]	Sus scrofa	402	402	1	1e-137	82.17
XP_038604452.1	240	three prime repair exonuclease 2 [Tachyglossus aculeatus]	Tachyglossus aculeatus	160	160	0.7	6e-44	42.48
XP_038595983.1	335	three-prime repair exonuclease 1 isoform X1 [Tachyglossus aculeatus]	Tachyglossus aculeatus	243	243	0.71	6e-75	58.44
XP_038595984.1	316	three-prime repair exonuclease 1 isoform X2 [Tachyglossus aculeatus]	Tachyglossus aculeatus	242	242	0.71	6e-75	58.77
XP_037368743.1	236	three prime repair exonuclease 2 [Talpa occidentalis]	Talpa occidentalis	155	155	0.7	3e-42	46.46
XP_037384456.1	313	three-prime repair exonuclease 1 [Talpa occidentalis]	Talpa occidentalis	386	386	0.99	2e-131	80.77
XP_037961231.1	344	uncharacterized protein LOC119690280 [Teleopsis dalmanni]	Teleopsis dalmanni	62.8	62.8	0.48	3e-07	30.52
XP_024871036.1	322	uncharacterized protein LOC112454073 [Temnothorax curvispinosus]	Temnothorax curvispinosus	56.6	56.6	0.46	3e-05	32.65
XP_029769837.1	223	three prime repair exonuclease 2 [Terrapene carolina triunguis]	Terrapene carolina triunguis	145	145	0.72	3e-38	41.23
XP_032066707.1	224	three prime repair exonuclease 2 [Thamnophis elegans]	Thamnophis elegans	144	144	0.7	4e-38	41.44
XP_013930654.1	224	PREDICTED: three prime repair exonuclease 2 [Thamnophis sirtalis]	Thamnophis sirtalis	145	145	0.7	2e-38	41.44
XP_025227581.1	275	three prime repair exonuclease 2 [Theropithecus gelada]	Theropithecus gelada	148	148	0.7	5e-39	46.02
XP_025233071.1	314	three-prime repair exonuclease 1 isoform X1 [Theropithecus gelada]	Theropithecus gelada	454	454	1	3e-158	95.54
XP_025233072.1	304	three-prime repair exonuclease 1 isoform X2 [Theropithecus gelada]	Theropithecus gelada	434	434	0.96	8e-151	95.39
XP_034255083.1	311	uncharacterized protein LOC117653498 [Thrips palmi]	Thrips palmi	75.5	75.5	0.5	1e-11	33.54
YP_009116711.1	235	V-TREX [Tipula oleracea nudivirus]	Tipula oleracea nudivirus	85.9	85.9	0.72	9e-16	29.61
XP_018366950.1	275	PREDICTED: uncharacterized protein LOC108763641 [Trachymyrmex cornetzi]	Trachymyrmex cornetzi	54.7	54.7	0.46	0.0001	31.97
XP_018356506.1	323	PREDICTED: uncharacterized protein LOC108756871 [Trachymyrmex septentrionalis]	Trachymyrmex septentrionalis	51.2	51.2	0.46	0.002	31.97
XP_018311013.1	267	PREDICTED: uncharacterized protein LOC108727395 [Trachymyrmex zeteki]	Trachymyrmex zeteki	54.7	54.7	0.46	0.0001	31.97
XP_033056811.1	236	three prime repair exonuclease 2 [Trachypithecus francoisi]	Trachypithecus francoisi	153	153	0.7	3e-41	46.46
XP_033062185.1	314	three-prime repair exonuclease 1 [Trachypithecus francoisi]	Trachypithecus francoisi	455	455	1	9e-159	95.54
XP_008191467.1	232	PREDICTED: three prime repair exonuclease 2 [Tribolium castaneum]	Tribolium castaneum	113	113	0.69	4e-26	32.9
XP_969470.1	319	PREDICTED: three-prime repair exonuclease 1 [Tribolium castaneum]	Tribolium castaneum	82.8	82.8	0.57	4e-14	30.11
XP_044252348.1	318	uncharacterized protein LOC123003584 [Tribolium madens]	Tribolium madens	84.7	84.7	0.48	6e-15	33.33
XP_004390611.1	236	three prime repair exonuclease 2 [Trichechus manatus latirostris]	Trichechus manatus latirostris	152	152	0.71	4e-41	45.81
XP_004368549.1	314	three-prime repair exonuclease 1 [Trichechus manatus latirostris]	Trichechus manatus latirostris	348	348	0.99	2e-116	79.49
XP_003374553.1	361	three prime repair exonuclease 1 [Trichinella spiralis]	Trichinella spiralis	75.9	75.9	0.48	1e-11	37.5
XP_026727531.1	320	uncharacterized protein LOC113493735 [Trichoplusia ni]	Trichoplusia ni	76.3	123	0.7	6e-12	30.91
XP_026727532.1	308	uncharacterized protein LOC113493736 [Trichoplusia ni]	Trichoplusia ni	62.8	111	0.7	2e-07	30.92
XP_026727533.1	303	uncharacterized protein LOC113493737 [Trichoplusia ni]	Trichoplusia ni	71.6	71.6	0.48	2e-10	32.9
XP_026743517.1	315	uncharacterized protein LOC113505154 [Trichoplusia ni]	Trichoplusia ni	63.2	63.2	0.49	2e-07	35.62
XP_036596275.1	241	three prime repair exonuclease 2 [Trichosurus vulpecula]	Trichosurus vulpecula	155	155	0.71	5e-42	42.36
XP_036594929.1	325	three-prime repair exonuclease 1 [Trichosurus vulpecula]	Trichosurus vulpecula	282	282	0.74	1e-90	65.25
XP_006166750.1	260	LOW QUALITY PROTEIN: three prime repair exonuclease 2 [Tupaia chinensis]	Tupaia chinensis	152	152	0.7	1e-40	45.29
XP_006171066.1	313	three-prime repair exonuclease 1 [Tupaia chinensis]	Tupaia chinensis	369	369	1	1e-124	80.25
XP_033705074.1	217	LOW QUALITY PROTEIN: three prime repair exonuclease 2 [Tursiops truncatus]	Tursiops truncatus	99.4	99.4	0.7	7e-21	36.89
XP_004312851.1	314	three-prime repair exonuclease 1 [Tursiops truncatus]	Tursiops truncatus	411	411	1	2e-141	83.12
XP_026239674.1	314	three-prime repair exonuclease 1 [Urocitellus parryii]	Urocitellus parryii	405	405	1	2e-139	82.8
XP_026344974.3	269	three prime repair exonuclease 2 [Ursus arctos]	Ursus arctos	153	153	0.7	5e-41	46.9
XP_040483017.1	236	three prime repair exonuclease 2 [Ursus maritimus]	Ursus maritimus	154	154	0.7	7e-42	46.9
XP_040483019.1	269	three prime repair exonuclease 2 isoform X1 [Ursus maritimus]	Ursus maritimus	154	154	0.7	4e-41	46.9
XP_008702046.1	314	three-prime repair exonuclease 1 [Ursus maritimus]	Ursus maritimus	395	395	1	3e-135	81.21
XP_047540097.1	272	three-prime repair exonuclease 1-like [Vanessa atalanta]	Vanessa atalanta	85.1	85.1	0.7	3e-15	28.37
XP_047540022.1	292	uncharacterized protein LOC125073297 [Vanessa atalanta]	Vanessa atalanta	76.3	76.3	0.45	6e-12	38.1
XP_046973759.1	269	three prime repair exonuclease 2-like [Vanessa cardui]	Vanessa cardui	78.6	78.6	0.53	6e-13	33.14
XP_046973758.1	292	three prime repair exonuclease 2-like [Vanessa cardui]	Vanessa cardui	76.6	76.6	0.62	4e-12	29.29
XP_026494466.1	271	three-prime repair exonuclease 1-like [Vanessa tameamea]	Vanessa tameamea	88.6	88.6	0.7	2e-16	27.76
XP_026494463.1	292	uncharacterized protein LOC113399532 [Vanessa tameamea]	Vanessa tameamea	75.9	75.9	0.45	6e-12	37.41
XP_044299418.1	227	three prime repair exonuclease 2-like isoform X1 [Varanus komodoensis]	Varanus komodoensis	135	135	0.72	2e-34	37.39
XP_044299419.1	211	three prime repair exonuclease 2-like isoform X2 [Varanus komodoensis]	Varanus komodoensis	122	122	0.67	1e-29	37.85
XP_022658969.1	385	uncharacterized protein LOC111249405 [Varroa destructor]	Varroa destructor	68.6	68.6	0.48	4e-09	33.54
XP_006218596.1	236	three prime repair exonuclease 2 [Vicugna pacos]	Vicugna pacos	147	147	0.7	7e-39	45.13
XP_006220391.2	316	three-prime repair exonuclease 1 isoform X1 [Vicugna pacos]	Vicugna pacos	394	394	0.99	9e-135	82.11
XP_031542452.1	261	three-prime repair exonuclease 1 isoform X2 [Vicugna pacos]	Vicugna pacos	325	325	0.8	2e-108	81.35
XP_011878532.1	334	PREDICTED: uncharacterized protein LOC105567893 [Vollenhovia emeryi]	Vollenhovia emeryi	54.3	54.3	0.46	0.0002	33.11
XP_027691541.1	240	three prime repair exonuclease 2 [Vombatus ursinus]	Vombatus ursinus	151	151	0.71	1e-40	41.92
XP_027716428.1	325	three-prime repair exonuclease 1 [Vombatus ursinus]	Vombatus ursinus	281	281	0.77	7e-90	65.31
XP_041598143.1	290	three prime repair exonuclease 2 [Vulpes lagopus]	Vulpes lagopus	150	150	0.7	1e-39	46.9
XP_041617759.1	373	three-prime repair exonuclease 1 isoform X1 [Vulpes lagopus]	Vulpes lagopus	393	393	1	2e-133	82.17
XP_041617760.1	339	three-prime repair exonuclease 1 isoform X2 [Vulpes lagopus]	Vulpes lagopus	394	394	1	2e-134	82.17
XP_025843844.1	236	three prime repair exonuclease 2 [Vulpes vulpes]	Vulpes vulpes	151	151	0.7	1e-40	46.9
XP_025844597.1	373	three-prime repair exonuclease 1 [Vulpes vulpes]	Vulpes vulpes	394	394	1	1e-133	82.17
XP_018088281.1	232	three prime repair exonuclease 2 [Xenopus laevis]	Xenopus laevis	152	152	0.73	6e-41	42.31
XP_041429164.1	241	three prime repair exonuclease 2 isoform X1 [Xenopus laevis]	Xenopus laevis	155	155	0.73	3e-42	42.74
XP_041429165.1	232	three prime repair exonuclease 2 isoform X2 [Xenopus laevis]	Xenopus laevis	156	156	0.73	2e-42	42.74
XP_004916766.1	230	three prime repair exonuclease 2 [Xenopus tropicalis]	Xenopus tropicalis	159	159	0.72	1e-43	42.79
XP_027464670.1	236	three prime repair exonuclease 2 [Zalophus californianus]	Zalophus californianus	152	152	0.7	6e-41	47.35
XP_027439307.1	314	three-prime repair exonuclease 1 [Zalophus californianus]	Zalophus californianus	401	401	1	1e-137	80.89
XP_038218372.1	284	uncharacterized protein LOC119836969 [Zerene cesonia]	Zerene cesonia	74.3	74.3	0.48	3e-11	31.61
XP_038218470.1	284	uncharacterized protein LOC119837053 [Zerene cesonia]	Zerene cesonia	78.6	78.6	0.7	8e-13	26.33
XP_011189352.1	241	three-prime repair exonuclease 1 [Zeugodacus cucurbitae]	Zeugodacus cucurbitae	75.9	75.9	0.52	3e-12	28
XP_011193531.1	336	uncharacterized protein Trex1_1 [Zeugodacus cucurbitae]	Zeugodacus cucurbitae	74.3	74.3	0.48	4e-11	34.39
XP_021917814.1	265	three prime repair exonuclease 2 isoform X1 [Zootermopsis nevadensis]	Zootermopsis nevadensis	105	105	0.72	9e-23	31.06
XP_021917815.1	160	three-prime repair exonuclease 1 isoform X2 [Zootermopsis nevadensis]	Zootermopsis nevadensis	73.6	73.6	0.37	6e-12	30.46
XP_034996988.1	225	three prime repair exonuclease 2 [Zootoca vivipara]	Zootoca vivipara	145	145	0.72	3e-38	41.67
XP_034963956.1	488	uncharacterized protein LOC118081570 [Zootoca vivipara]	Zootoca vivipara	197	197	0.72	2e-55	48.51
