# Supplementary material for: Prevalence and impact of molecular variation in the three-prime repair exonuclease 1 TREX1 and its implications for oncology
Source: Hum Genomics. 2025 Jun 28;19:73. doi: 10.1186/s40246-025-00785-y (PMC12206365; doi:10.1186/s40246-025-00785-y)
Supplement: Supplementary file 5 — Additional file 5. Table S2. Nucleotide sequence matches identified using blastn searches of the NCBI GenBank nr database using 39-nt palindromic sequence in the C-terminal region of the koala TREX1 gene as a query. [file 40246_2025_785_MOESM5_ESM.xlsx]

## Sheet: Table_S2
Table S2. Nucleotide sequence matches identified using blastn searches of the NCBI GenBank nr database using 39-nt palindromic sequence in the C-terminal region of the koala TREX1 gene as a query
Description	Scientific Name	Max Score	Total Score	Query Cover	E value	Per. ident	Acc. Len	Accession	Comment	Category
PREDICTED: Phascolarctos cinereus three prime repair exonuclease 1 (TREX1), mRNA	Phascolarctos cinereus	71.6	71.6	1	2e-09	100	1264	XM_020999219.1	Koala (query sequence)	Marsupial
PREDICTED: Vombatus ursinus three prime repair exonuclease 1 (TREX1), mRNA	Vombatus ursinus	58.1	58.1	1	3e-05	92.31	1307	XM_027860627.1	Common wombat	Marsupial
PREDICTED: Trichosurus vulpecula three prime repair exonuclease 1 (TREX1), mRNA	Trichosurus vulpecula	58.1	58.1	0.87	3e-05	97.06	1288	XM_036739034.1	Common brushtain possum	Marsupial
Ananas comosus genome assembly, chromosome: 11	Ananas comosus	54.5	54.5	0.94	4e-04	91.89	13096665	LR828291.1	Pineapple	Plant
Empedobacter brevis strain SE1-3 chromosome, complete genome	Empedobacter brevis	53.6	53.6	1	4e-04	89.74	3591742	CP043634.1	Species of flavobacteria	Bacteria
Spodoptera exigua genome assembly, chromosome: 11	Spodoptera exigua	50.9	50.9	0.89	0.005	91.43	15427594	LR824612.2	Beet armyworm	Invertebrate (Insect)
Pterostichus niger genome assembly, chromosome: 5	Pterostichus niger	50	50	0.84	0.005	94.12	38838954	OX380338.1	Species of ground beetle	Insect
Empedobacter brevis strain BCLYD2 chromosome, complete genome	Empedobacter brevis	49.1	49.1	1	0.018	87.18	3794924	CP013210.1	Species of flavobacteria	Bacteria
Pinctada fucata DNA, chromosome 4, nearly complete sequence, Alternate Pseudohaplotype	Pinctada fucata	49.1	49.1	0.74	0.018	96.55	70740401	AP027119.1	Akoya pearl oyster	Invertebrate (Mollusk)
Pinctada fucata DNA, chromosome 4, nearly complete sequence, Principal Pseudohaplotype	Pinctada fucata	49.1	49.1	0.74	0.018	96.55	71437201	AP027105.1	Akoya pearl oyster	Invertebrate (Mollusk)
Limnephilus rhombicus genome assembly, chromosome: 14	Limnephilus rhombicus	49.1	49.1	0.76	0.018	96.77	53715214	OV815284.1	Northern caddisfly	Invertebrate (Insect)
Limnephilus marmoratus genome assembly, chromosome: 17	Limnephilus marmoratus	49.1	49.1	0.76	0.018	96.77	54377349	OU862923.1	Caddisfly	Invertebrate (Insect)
Selenia dentaria genome assembly, chromosome: 5	Selenia dentaria	49.1	49.1	0.74	0.018	96.55	40935019	OU862880.1	Early thorn (moss species)	Invertebrate (Insect)
Borrelia sp. A-FGy1 chromosome	Borrelia sp. A-FGy1	49.1	49.1	0.74	0.018	96.55	918483	CP043682.1	Spirochete species	Bacteria
Arabidopsis thaliana genome assembly, chromosome: 4	Arabidopsis thaliana	48.2	48.2	0.97	0.018	87.5	18725877	LR782545.1	Thale cress	Plant
Hoplodrina ambigua genome assembly, chromosome: 26	Hoplodrina ambigua	48.2	48.2	0.84	0.018	93.94	9877060	OX458990.1	Vine's rustic (moss species)	Invertebrate (Insect)
Arabidopsis thaliana chromosome 4	Arabidopsis thaliana	48.2	48.2	0.97	0.018	87.5	21938885	CP116283.1	Thale cress	Plant
Campoletis raptor genome assembly, chromosome: 7	Campoletis raptor	48.2	48.2	0.79	0.018	93.55	18208506	OX403628.1	Ichneumonid wasp	Invertebrate (Insect)
Arabidopsis thaliana genome assembly, chromosome: 4	Arabidopsis thaliana	48.2	48.2	0.97	0.018	87.5	22582341	OX298805.1	Thale cress	Plant
Arabidopsis thaliana chromosome 4	Arabidopsis thaliana	48.2	48.2	0.97	0.018	87.5	22104501	CP087129.2	Thale cress	Plant
Arabidopsis thaliana isolate t2t_salk_col chromosome 4	Arabidopsis thaliana	48.2	48.2	0.97	0.018	87.5	21578073	CP096027.1	Thale cress	Plant
Fraxinus pennsylvanica genome assembly, chromosome: 14	Fraxinus pennsylvanica	48.2	48.2	0.87	0.018	89.19	27471413	OU503049.1	Green ash	Plant
Arabidopsis thaliana chromosome 4	Arabidopsis thaliana	48.2	48.2	0.97	0.018	87.5	18585056	CP002687.1	Thale cress	Plant
Arabidopsis thaliana DNA chromosome 4, contig fragment No. 35	Arabidopsis thaliana	48.2	48.2	0.97	0.018	87.5	199280	AL161535.2	Thale cress	Plant
Arabidopsis thaliana DNA chromosome 4, BAC clone F17N18 (ESSA project)	Arabidopsis thaliana	48.2	48.2	0.97	0.018	87.5	86377	AL049751.1	Thale cress	Plant
