# Supplementary material for: Prevalence and impact of molecular variation in the three-prime repair exonuclease 1 TREX1 and its implications for oncology
Source: Hum Genomics. 2025 Jun 28;19:73. doi: 10.1186/s40246-025-00785-y (PMC12206365; doi:10.1186/s40246-025-00785-y)
Supplement: Supplementary file 6 — Additional file 6. Table S3. Public online resources used for collection of human TREX1 genomic and protein sequence variants in human samples, cell lines, and organoids and for annotation of their impact. [file 40246_2025_785_MOESM6_ESM.xlsx]

## Sheet: Table_S3
Table S3. Public online resources used for collection of human TREX1 genomic and protein sequence variants in human samples, cell lines, and organoids and for annotation of their impact.
Database	TREX1 variant data	Phenotype	Germline or somatic	URL for data collection	Reference
ClinVar	Curated variant list and annotation of clinical relevance	Autoimmune disease	Germline	https://www.ncbi.nlm.nih.gov/clinvar	[1]
LOVD v. 3.0	Curated variant list	Autoimmune disease	Germline	https://www.lovd.nl	[2]
Leiden Open Variation Database
Decipher v. 11.22	Clinical patient data	Autoimmune disease	Germline	https://www.deciphergenomics.org/	[3]
DatabasE of genomiC varIation and Phenotype in Humans using Ensembl Resources
COSMIC v. 98	Curated variants from patient tumor samples and cancer cell lines from publications and cancer databases	Cancer	Predominantly somatic	https://cancer.sanger.ac.uk/cosmic	[4]
Catalogue of Somatic Mutations in Cancer
TCGA	Somatic variants from primary patient tumor samples from 32 tumor histologies	Cancer	Predominantly somatic	http://www.cbioportal.org/datasets	[5]
The Cancer Genome Atlas Program
gnomAD 3.1.2	Human variation data from a variety of large-scale sequencing projects	Normal and disease-related variants without phenotype annotation	Germline	https://gnomad.broadinstitute.org	[6]
The Genome Aggregation Database
AlphaMissense	Predicted pathogenicity of all DNA and protein variants within TREX1 b and c isoforms	Predicted normal and disease-associated variants	All possible variants	https://zenodo.org/records/8208688	[7]
ClinVar, LOVD, Decipher, COSMIC, TCGA, and gnomAD provided previously reported TREX1 variants in human patient samples, cell lines, or organoids. All variant annotations within ClinVar, LOVD, and Decipher databases described curated effects of germline TREX1 variants in patients with autoimmune disease. COSMIC and TCGA provided the lists of TREX1 variants occurring in cancer patient samples (both…
References for Table S3 1. Landrum MJ, Lee JM, Benson M, Brown GR, Chao C, Chitipiralla S et al. ClinVar: improving access to variant interpretations and supporting evidence. Nucleic Acids Res. 2018;46:D1062-D7. 2. Fokkema I, Kroon M, Lopez Hernandez JA, Asscheman D, Lugtenburg I, Hoogenboom J, den Dunnen JT. The LOVD3 platform: efficient genome-wide sharing of genetic variants. Eur J Hum Genet. …
