# Supplementary material for: Prevalence and impact of molecular variation in the three-prime repair exonuclease 1 TREX1 and its implications for oncology
Source: Hum Genomics. 2025 Jun 28;19:73. doi: 10.1186/s40246-025-00785-y (PMC12206365; doi:10.1186/s40246-025-00785-y)
Supplement: Supplementary file 7 — Additional file 7. Table S4. Information about COSMIC TREX1 gene and isoform entries used for collection of TREX1 variants. [file 40246_2025_785_MOESM7_ESM.xlsx]

## Sheet: Table_S4
Table S4. Information about COSMIC TREX1 gene and isoform entries used for collection of TREX1 variants
Information about TREX1 entries, alternate IDs, numbers of tested samples, numbers of simple mutations, numbers of fusions, and numbers of coding mutations was obtained from COSMIC.
Entry	Alternate IDs	Tested samples	Simple Mutations	Fusions	Coding Mutations	Additional comments
TREX1	TREX1_ENST00000629913.3,TREX1, ENSP00000486444.2, TREX1.html, NP_057465, NM_016381.5, ENSG00000213689.12,12269,606609, Q9NSU2, CCDS43086.1, 11277, DRN3, AGS1, COSG629913	44766	126	0	126	The entire TREX1 gene, includes data on all three TREX1 isoforms a, b, and c. Annotation of amino acid variants is provided according to the positions in the longest TREX1 transcript, TREX1a
TREX1_ENST00000625293	TREX1_ENST00000625293,ENST00000625293.2,TREX1,ENSP00000486676.2, TREX1.html, NP_338599, NM_033629.4, ENSG00000213689.12,12269,606609, Q9NSU2, CCDS2769.1,11277, DRN3, AGS1, COSG625293	44766	141	0	141	TREX1b isoform, protein start is 55 aa after the start of the TREX1a isoform.
TREX1_ENST00000444177	TREX1_ENST00000444177,ENST00000444177.1,TREX1,ENSP00000415972.1,TREX1.html, NP_009179, NM_007248.3, ENSG00000213689.12,12269,606609, Q9NSU2,CCDS59451.1,11277,DRN3, AGS1, COSG444177	44766	139	0	139	TREX1c isoform, protein start is 10 aa after the start of the TREX1b isoform.
