# Supplementary material for: Prevalence and impact of molecular variation in the three-prime repair exonuclease 1 TREX1 and its implications for oncology
Source: Hum Genomics. 2025 Jun 28;19:73. doi: 10.1186/s40246-025-00785-y (PMC12206365; doi:10.1186/s40246-025-00785-y)
Supplement: Supplementary file 8 — Additional file 8. Table S5. Frequencies of TREX1 copy number alterations in TCGA studies. [file 40246_2025_785_MOESM8_ESM.xlsx]

## Sheet: Table_S5
Table S5. Frequencies of TREX1 copy number alterations in TCGA studies
TREX1 CNA were obtained from cBioPortal. Discrete copy number levels had been derived from copy-number analysis algorithms such as GISTIC or RAE, and are reported as provided in the cBioPortal. They indicate the copy-number level per gene:
2 or Amplification indicate a high-level amplification (more copies, often focal)
1 or Gain indicates a low-level gain (a few additional copies, often broad)
0 is diploid
-1 or Shallow Deletion indicates a shallow loss, possibly a heterozygous deletion
-2 or Deep Deletion indicates a deep loss, possibly a homozygous deletion
TCGA PanCancer Study	Primary tissue	Total No. samples	% samples with TREX1 amplification (CN=2)	% samples with TREX1 copy number gain (CN=1)	% samples with diploid TREX1 (CN=0)	% samples with TREX1 shallow deletion (CN=−1)	% samples with TREX1 deep deletion (CN=−2)
ACC	adrenocortical_carcinoma	89	0	0.11236	0.640449	0.247191	0
BLCA	bladder	408	0.00245098	0.252451	0.460784	0.276961	0.00735294
BRCA	breast	1070	0	0.082243	0.602804	0.31028	0.0046729
CESC	cervical_squamous_cell	293	0	0.102389	0.494881	0.399317	0.00341297
CHOL	cholangiocarcinoma	36	0	0.0277778	0.138889	0.833333	0
COADREAD	colorectal	592	0.00168919	0.0962838	0.748311	0.148649	0.00506757
DLBCL	diffuse_large_B_cell_lymphoma	48	0	0.208333	0.645833	0.0833333	0.0625
ESCA	esophagus	182	0	0.0714286	0.269231	0.648352	0.010989
GBM	glioblastoma	575	0	0.106087	0.801739	0.0921739	0
HNSC	head_and_neck	517	0	0.0174081	0.26499	0.715667	0.00193424
KICH	kidney_chromophobe	65	0.0153846	0.0769231	0.753846	0.153846	0
KIRC	kidney_clear_cell	509	0	0.0117878	0.104126	0.858546	0.0255403
KIRP	kidney_papillary_cell	283	0	0.250883	0.660777	0.0883392	0
LAML	acute_myeloid_leukemia	191	0	0.0052356	0.963351	0.0314136	0
LGG	low_grade_glioma	511	0.00195695	0.0215264	0.882583	0.0821918	0.0117417
LIHC	liver	367	0.0027248	0.0980926	0.72752	0.168937	0.0027248
LUAD	lung_adenocarcinoma	511	0	0.0606654	0.463796	0.475538	0
LUSC	lung_squamous_cell	487	0	0.00616016	0.12731	0.86037	0.00616016
MESO	mesothelioma	87	0	0.091954	0.390805	0.505747	0.0114943
OVCA	ovarian	572	0.0104895	0.183566	0.472028	0.33042	0.0034965
PAAD	pancreas	183	0	0.0273224	0.710383	0.256831	0.00546448
PCPG	pheochromocytoma_and_paraganglioma	161	0.0124224	0.00621118	0.608696	0.372671	0
PRAD	prostate	489	0.00204499	0.0736196	0.883436	0.0347648	0.00613497
SARC	sarcoma	253	0	0.166008	0.58498	0.237154	0.0118577
SKCM	melanoma	367	0.0027248	0.168937	0.629428	0.19891	0
STAD	stomach	438	0	0.0616438	0.60274	0.328767	0.00684932
TCGT	testicular	149	0	0.174497	0.590604	0.234899	0
THCA	thyroid	497	0	0.00603622	0.987928	0.00603622	0
THYM	thymoma	123	0	0	0.878049	0.113821	0.00813008
UCEC	endometrial	523	0.00573614	0.0956023	0.780115	0.118547	0
UCS	uterine_carcinosarcoma	56	0	0.178571	0.196429	0.625	0
UVM	uveal_melanoma	80	0	0.0125	0.4375	0.55	0
All studies combined	All studies combined	10712	0.00168036	0.0860717	0.597367	0.309746	0.00513443
