# Supplementary material for: Prevalence and impact of molecular variation in the three-prime repair exonuclease 1 TREX1 and its implications for oncology
Source: Hum Genomics. 2025 Jun 28;19:73. doi: 10.1186/s40246-025-00785-y (PMC12206365; doi:10.1186/s40246-025-00785-y)
Supplement: Supplementary file 9 — Additional file 9. Table S6. Information about genomic TREX1 sequence variants compiled from public databases. [file 40246_2025_785_MOESM9_ESM.xlsx]

## Sheet: Table_S6
Table S6. Information about genomic TREX1 sequence variants compiled from public databases
Data sources are listed in Table S3. Information for identical DNA sequence variants was merged by genomic position and by the type of genomic change.
COSMIC information for three TREX1 isoforms a, b, and c obtained is provided separately for each isoform. Transcript IDs for each isoform are provided in Table S4.
Data for the longest TREX1a isoform were collected from COSMIC using information for the entire TREX1 gene (ENST00000629913.3).
Allele frequency in gnomAD was labeled as Elevated if database-wide frequency of a given variant allele was > 0.0011, and as Low if it were <= 0.0011.
Location_GRCh38	Location_hg19	Genomic_change	COSMIC-CDS Mutation_TREX1b	COSMIC-Position_TREX1b	COSMIC-AA Mutation_TREX1b	COSMIC-Legacy Mutation ID_TREX1b	COSMIC-Count_TREX1b	COSMIC-Type_TREX1b	COSMIC-Gene Name_TREX1b	COSMIC-Transcript_TREX1b	COSMIC-Census Tier_TREX1b	COSMIC-Sample Name_TREX1b	COSMIC-Sample ID_TREX1b	COSMIC-Primary Tissue_TREX1b	COSMIC-Tissue Subtype1_TREX1b	COSMIC-Tissue Subtype 2_TREX1b	COSMIC-Histology_TREX1b	COSMIC-Histology Subtype1_TREX1b	COSMIC-Histology Subtype2_TREX1b	COSMIC-PubMed ID_TREX1b	COSMIC-CGP Study_TREX1b	COSMIC-Somatic Status_TREX1b	COSMIC-Sample Type_TREX1b	COSMIC-Zygosity_TREX1b	COSMIC-Genomic Coordinates_TREX1b	COSMIC-CDS Mutation_TREX1a	COSMIC-Position_TREX1a	COSMIC-AA Mutation_TREX1a	COSMIC-Legacy Mutation ID_TREX1a	COSMIC-Count_TREX1a	COSMIC-Type_TREX1a	COSMIC-Gene Name_TREX1a	COSMIC-Transcript_TREX1a (gene)	COSMIC-Census Tier_TREX1a	COSMIC-Sample Name_TREX1a	COSMIC-Sample ID_TREX1a	COSMIC-Primary Tissue_TREX1a	COSMIC-Tissue Subtype 1_TREX1a	COSMIC-Tissue Subtype 2_TREX1a	COSMIC-Histology_TREX1a	COSMIC-Histology Subtype 1_TREX1a	COSMIC-Histology Subtype 2_TREX1a	COSMIC-PubMedID_TREX1a	COSMIC-CGP Study_TREX1a	COSMIC-Somatic Status_TREX1a	COSMIC-Sample Type_TREX1a	COSMIC-Zygosity_TREX1a	COSMIC-Genomic Coordinates_TREX1a	COSMIC-CDS Mutation_TREX1c
48447048	48488452	C>T
48450071	48491477	G>A
48459357	48500756	A>G
48460530	48501929	C>T
48460678	48502077	C>T
48463805	48505204	C>T
48464650	48506049	G>C
48464838	48506237	G>A
48464880	48506279	G>A
48464908	48506307	C>G
48464918	48506317	C>T
48464990	48506389	A>T
48465072	48506471	C>T
48466264	48507663	A>T
48466268	48507667	T>C
48466357	48507756	G>T
48466421	48507820	C>T
48466434	48507833	G>C
48466454	48507853	G>A
48466455	48507854	G>A
48466473	48507872	C>T
48466488	48507887	del
48466495	48507894	G>A
48466510	48507909	G>A																								c.20G>A	7	p.R7K	COSM7640988	1	Substitution - Missense	TREX1	ENST00000629913.3	No	TCGA-E7-A7DV-01	2193219	Urinary tract	Bladder	NS	Carcinoma	NS	NS	-	413	Confirmed Somatic	Unknown	Unknown	3:48466510..48466510
48466511	48507910	A>G
48466512		C>T																								c.22C>T	8	p.Q8*	COSM5814133	2	Substitution - Nonsense	TREX1	ENST00000629913.3	No	LICA-CN-ICC013T; ICC013T	2634245, 2506998	Liver	NS	NS	Other	Neoplasm	NS	-	660	Confirmed Somatic	Tumour Sample	Unknown	3:48466512..48466512
48466519	48507918	G>C																								c.29G>C	10	p.R10T	COSM7640833	2	Substitution - Missense	TREX1	ENST00000629913.3	No	TCGA-P3-A6SW-01;TCGA-E7-A7DV-01	21936502193219	Upper aerodigestive tract,Urinary tract	Head neck,Bladder	NS	Carcinoma	Squamous cell carcinoma,NS	NS	-	627413	Confirmed Somatic	Unknown	Unknown	3:48466519..48466519
48466535	48507934	G>T																								c.45G>T	15	p.R15S	COSM4002722	2	Substitution - Missense	TREX1	ENST00000629913.3	No	SNUH_G10_S1;2014_SWES_13_DX	21205462743824	Haematopoietic and lymphoid	NS	NS	Haematopoietic neoplasm	Acute myeloid leukaemia	NS	-	544	Confirmed Somatic	Unknown,Tumour Sample	Unknown	3:48466535..48466535
48466557	48507956	C>G																								c.67C>G	23	p.P23A	COSM1423752	1	Substitution - Missense	TREX1	ENST00000629913.3	No	TCGA-G4-6586-01	1651336	Large intestine	Colon	Ascending	Carcinoma	Adenocarcinoma	NS	-	376	Confirmed Somatic	Unknown	Unknown	3:48466557..48466557
48466560	48507959	C>G
48466560		C>T																								c.70C>T	24	p.P24S	COSM10115735	1	Substitution - Missense	TREX1	ENST00000629913.3	No	PGM63	2927210	Stomach	NS	NS	Carcinoma	Adenocarcinoma	NS	25583476	-	Confirmed Somatic	Tumour Sample	Unknown	3:48466560..48466560
48466561		C>A																								c.71C>A	24	p.P24H	COSM6807707	1	Substitution - Missense	TREX1	ENST00000629913.3	No	T207430	2658236	Large intestine	NS	NS	Carcinoma	Adenocarcinoma	NS	27149842	-	Confirmed Somatic	Unknown	Unknown	3:48466561..48466561
48466562	48507961	T>A
48466565	48507964	C>A
48466569	48507968	C>A
48466578		del																								c.88del	30	p.L30Ffs*4	COSM5602469	1	Deletion - Frameshift	TREX1	ENST00000629913.3	No	Au3	2466842	Skin	Chest	NS	Malignant melanoma	Desmoplastic	NS	26343386	-	Confirmed Somatic	Tumour Sample	Unknown	3:48466578..48466578
48466581	48507980	C>T
48466582		G>A
48466582		G>C
48466582		G>T
48466583		dup
48466593	48507992	del
48466593		C>G
48466593		C>T
48466593		del
48466596		G>T
48466600		C>T
48466602		C>T
48466605		A>G
48466608		C>T
48466612		C>T
48466616		A>C
48466617		T>C
48466623		T>C
48466624		C>T
48466625		T>C
48466629	48508028	G>A																								c.139G>A	47	p.G47S	COSM10025504	1	Substitution - Missense	TREX1	ENST00000629913.3	No	GBC_2	2907848	Biliary tract	Gallbladder	NS	Carcinoma	Adenocarcinoma	NS	33563892	-	Variant of unknown origin	Tumour Sample	Unknown	3:48466629..48466629
48466642		dup
48466643		T>G
48466645		C>G
48466645-48466657	48508044-48508056	del
48466646		G>A
48466648		A>C																								c.158A>C	53	p53S	COSM6302577	1	Substitution - Missense	TREX1	ENST00000629913.3	No	CHG-13-08463T	2634307	Liver	NS	NS	Other	Neoplasm	NS	-	660	Confirmed Somatic	Tumour Sample	Unknown	3:48466648..48466648
48466648		A>G
48466651		dup
48466653		A>G																								c.163A>G	55	p.T55A	COSM4628216	1	Substitution - Missense	TREX1	ENST00000629913.3	No	Gp2D	2301973	Large intestine	NS	NS	Carcinoma	Adenocarcinoma	NS	24755471	-	Variant of unknown origin	Cultured	Heterozygous	3:48466653..48466653
48466654	48508053	C>T
48466656	48508055	A>G
48466657	48508056	T>C
48466658	48508057	del
48466659		G>A
48466660	48508059	G>T
48466663	48508062	C>T
48466664		G>A
48466665	48508064	C>A
48466665	48508064	C>T	c.10C>T	4	p.Q4*	COSM8428039	1	Substitution - Nonsense	TREX1_ENST00000625293	ENST00000625293.2	No	TCGA-HZ-7289-01	2196538	Pancreas	NS	NS	Carcinoma	Ductal carcinoma	NS	-	629	Confirmed Somatic	Unknown	Unknown	3:48466665..48466665	c.175C>T	59	p.Q59*	COSM8428039	1	Substitution - Nonsense	TREX1	ENST00000629913.3	No	TCGA-HZ-7289-01	2196538	Pancreas	NS	NS	Carcinoma	Ductal carcinoma	NS	-	629	Confirmed Somatic	Unknown	Unknown	3:48466665..48466665
48466669	48508068	C>A
48466672-48466673	48508071-48508072	dup
48466673-48466674	48508072-48508073	dup
48466674	48508073	C>T
48466675	48508074	C>G
48466677	48508076	C>G
48466678	48508077	C>T
48466679		G>A
48466679		G>C
48466681	48508080	G>A
48466682	48508081	G>A
48466683		C>A	c.28C>A	10	p.P10T	COSM9105006	1	Substitution - Missense	TREX1_ENST00000625293	ENST00000625293.2	No	CHCOSK001	2779625	Biliary tract	Bile duct	NS	Carcinoma	NS	NS	27267998	-	Confirmed Somatic	Tumour Sample	Unknown	3:48466683..48466683	c.193C>A	65	p.P65T	COSM9105006	1	Substitution - Missense	TREX1	ENST00000629913.3	No	CHCOSK001	2779625	Biliary tract	Bile duct	NS	Carcinoma	NS	NS	27267998	-	Confirmed Somatic	Tumour Sample	Unknown	3:48466683..48466683
48466684	48508083	C>A
48466685		C>T
48466687	48508086	T>C
48466687	48508086	T>G
48466690	48508089	A>G
48466692		A>T
48466693	48508092	C>A
48466695	48508094	C>T
48466698	48508097-48508099	dup
48466700	48508099	C>G
48466705		T>C
48466706		C>G	c.51C>G	17	p.F17L	COSM9557860	2	Substitution - Missense	TREX1_ENST00000625293	ENST00000625293.2	No	BRCA-05246_CCPM_0300316-Tumor-SM-AXFHZ;BRCA-05246_CCPM_0300316-Tumor-SM-AFDG4	28575952857596	Breast	NS	NS	Carcinoma	ER-PR-positive carcinoma	NS	30531871	-	Confirmed Somatic	Tumour Sample	Unknown	3:48466706..48466706	c.216C>G	72	p.F72L	COSM9557860	2	Substitution - Missense	TREX1	ENST00000629913.3	No	BRCA-05246_CCPM_0300316-Tumor-SM-AXFHZ;BRCA-05246_CCPM_0300316-Tumor-SM-AFDG4	28575952857596	Breast	NS	NS	Carcinoma	ER-PR-positive carcinoma	NS	30531871	-	Confirmed Somatic	Tumour Sample	Unknown	3:48466706..48466706	c.21C>G
48466707	48508106	G>A
48466710	48508109	A>C
48466710	48508109	A>G
48466711		dup
48466711-48466712	48508110-48508111	dup
48466713	48508112	dup
48466716	48508115	G>A
48466722	48508121	G>A
48466723	48508122	G>A	c.68G>A	23	p.G23D	COSM8227842	1	Substitution - Missense	TREX1_ENST00000625293	ENST00000625293.2	No	TCGA-SW-A7EA-01	2339963	Stomach	NS	NS	Carcinoma	Adenocarcinoma	NS	-	541	Confirmed Somatic	Tumour Sample	Unknown	3:48466723..48466723	c.233G>A	78	p.G78D	COSM8227842	1	Substitution - Missense	TREX1	ENST00000629913.3	No	TCGA-SW-A7EA-01	2339963	Stomach	NS	NS	Carcinoma	Adenocarcinoma	NS	-	541	Confirmed Somatic	Tumour Sample	Unknown	3:48466723..48466723	c.38G>A
48466723		G>T	c.68G>T	23	p.G23V	COSM6807711	1	Substitution - Missense	TREX1_ENST00000625293	ENST00000625293.2	No	T593	2658231	Large intestine	NS	NS	Carcinoma	Adenocarcinoma	NS	27149842	-	Confirmed Somatic	Unknown	Unknown	3:48466723..48466723	c.233G>T	78	p.G78V	COSM6807711	1	Substitution - Missense	TREX1	ENST00000629913.3	No	T593	2658231	Large intestine	NS	NS	Carcinoma	Adenocarcinoma	NS	27149842	-	Confirmed Somatic	Unknown	Unknown	3:48466723..48466723	c.38G>T
48466724		C>T
48466728	48508127	C>A
48466729	48508128	C>T	c.74C>T	25	p.P25L	COSM1692736	1	Substitution - Missense	TREX1_ENST00000625293	ENST00000625293.2	No	YUPAT	2013666	Skin	NS	NS	Malignant melanoma	NS	NS	22842228	-	Confirmed Somatic	Unknown	Heterozygous	3:48466729..48466729	c.239C>T	80	p.P80L	COSM1692736	1	Substitution - Missense	TREX1	ENST00000629913.3	No	YUPAT	2013666	Skin	NS	NS	Malignant melanoma	NS	NS	22842228	-	Confirmed Somatic	Unknown	Heterozygous	3:48466729..48466729	c.44C>T
48466732-48466733		delinsCG	c.77_78delinsCG	26	p.F26S	COSM9812688	1	Substitution - Missense	TREX1_ENST00000625293	ENST00000625293.2	No	DD107_Org	2749229	Stomach	NS	NS	Carcinoma	Adenocarcinoma	NS	29703791	-	Confirmed Somatic	Cultured	Heterozygous	3:48466732..48466733	c.242_243delinsCG	81	p.F81S	COSM9812688	1	Substitution - Missense	TREX1	ENST00000629913.3	No	DD107_Org	2749229	Stomach	NS	NS	Carcinoma	Adenocarcinoma	NS	29703791	-	Confirmed Somatic	Cultured	Heterozygous	3:48466732..48466733	c.47_48delinsCG
48466735	48508134	C>T
48466738	48508137	A>G	c.83A>G	28	p.Q28R	COSM9812689	1	Substitution - Missense	TREX1_ENST00000625293	ENST00000625293.2	No	DD107_Org	2749229	Stomach	NS	NS	Carcinoma	Adenocarcinoma	NS	29703791	-	Confirmed Somatic	Cultured	Heterozygous	3:48466738..48466738	c.248A>G	83	p.Q83R	COSM9812689	1	Substitution - Missense	TREX1	ENST00000629913.3	No	DD107_Org	2749229	Stomach	NS	NS	Carcinoma	Adenocarcinoma	NS	29703791	-	Confirmed Somatic	Cultured	Heterozygous	3:48466738..48466738	c.53A>G
48466740	48508139	C>T	c.85C>T	29	p.P29S	COSM7168954	1	Substitution - Missense	TREX1_ENST00000625293	ENST00000625293.2	No	TCGA-YC-A89H-01	2339203	Urinary tract	Bladder	NS	Carcinoma	NS	NS	-	413	Confirmed Somatic	Tumour Sample	Unknown	3:48466740..48466740	c.250C>T	84	p.P84S	COSM7168954	1	Substitution - Missense	TREX1	ENST00000629913.3	No	TCGA-YC-A89H-01	2339203	Urinary tract	Bladder	NS	Carcinoma	NS	NS	-	413	Confirmed Somatic	Tumour Sample	Unknown	3:48466740..48466740	c.55C>T
48466743	48508142	A>G	c.88A>G	30	p.K30E	COSM9812690	1	Substitution - Missense	TREX1_ENST00000625293	ENST00000625293.2	No	DD107_Org	2749229	Stomach	NS	NS	Carcinoma	Adenocarcinoma	NS	29703791	-	Confirmed Somatic	Cultured	Heterozygous	3:48466743..48466743	c.253A>G	85	p.K85E	COSM9812690	1	Substitution - Missense	TREX1	ENST00000629913.3	No	DD107_Org	2749229	Stomach	NS	NS	Carcinoma	Adenocarcinoma	NS	29703791	-	Confirmed Somatic	Cultured	Heterozygous	3:48466743..48466743	c.58A>G
48466746	48508145	G>A
48466750	48508149	C>G
48466750	48508149	C>T
48466751		G>A
48466753	48508152	A>T
48466755		C>T
48466757		G>A
48466767	48508166	G>T
48466768	48508167	C>T
48466770		G>C
48466772		C>G
48466775		C>T
48466776		dup
48466776-48466777	48508175-48508176	dup
48466779		T>C	c.124T>C	42	p.C42R	COSM9812691	2	Substitution - Missense	TREX1_ENST00000625293	ENST00000625293.2	No	DD107_Org;DD191_Org	27492292749233	Stomach	NS,Gastroesophageal junction	NS	Carcinoma	Adenocarcinoma	NS	29703791	-	Confirmed Somatic	Cultured	Heterozygous	3:48466779..48466779	c.289T>C	97	p.C97R	COSM9812691	2	Substitution - Missense	TREX1	ENST00000629913.3	No	DD107_Org;DD191_Org	27492292749233	Stomach	NS,Gastroesophageal junction	NS	Carcinoma	Adenocarcinoma	NS	29703791	-	Confirmed Somatic	Cultured	Heterozygous	3:48466779..48466779	c.94T>C
48466780	48508179	G>A
48466781	48508180	T>G
48466782	48508181	G>A
48466782	48508181	G>T
48466786	48508185	T>C	c.131T>C	44	p.L44P	COSM4920953	1	Substitution - Missense	TREX1_ENST00000625293	ENST00000625293.2	No	TCGA-DD-A4NJ-01	2194542	Liver	NS	NS	Carcinoma	Hepatocellular carcinoma	NS	-	628	Confirmed Somatic	Unknown	Unknown	3:48466786..48466786	c.296T>C	99	p.L99P	COSM4920953	1	Substitution - Missense	TREX1	ENST00000629913.3	No	TCGA-DD-A4NJ-01	2194542	Liver	NS	NS	Carcinoma	Hepatocellular carcinoma	NS	-	628	Confirmed Somatic	Unknown	Unknown	3:48466786..48466786	c.101T>C
48466787-48466789		delinsAAG	c.132_134delinsAAG	45	p.E45R	COSM9430534	1	Substitution - Missense	TREX1_ENST00000625293	ENST00000625293.2	No	EXTERN_MELA_20140924_013	2839373	Skin	Face	NS	Malignant melanoma	NS	NS	28467829	-	Confirmed Somatic	Tumour Sample	Unknown	3:48466787..48466789	c.297_299delinsAAG	100	p.E100R	COSM9430534	1	Substitution - Missense	TREX1	ENST00000629913.3	No	EXTERN_MELA_20140924_013	2839373	Skin	Face	NS	Malignant melanoma	NS	NS	28467829	-	Confirmed Somatic	Tumour Sample	Unknown	3:48466787..48466789	c.102_104delinsAAG
48466791-48466792	48508190-48508191	dup
48466792	48508191	dup
48466792		G>A	c.137G>A	46	p.S46N	COSM9823492	1	Substitution - Missense	TREX1_ENST00000625293	ENST00000625293.2	No	DD191_Org	2749233	Stomach	Gastroesophageal junction	NS	Carcinoma	Adenocarcinoma	NS	29703791	-	Confirmed Somatic	Cultured	Heterozygous	3:48466792..48466792	c.302G>A	101	p.S101N	COSM9823492	1	Substitution - Missense	TREX1	ENST00000629913.3	No	DD191_Org	2749233	Stomach	Gastroesophageal junction	NS	Carcinoma	Adenocarcinoma	NS	29703791	-	Confirmed Somatic	Cultured	Heterozygous	3:48466792..48466792	c.107G>A
48466792-48466793	48508191-48508192	dup
48466793	48508192	del
48466793		C>T
48466793-48466794	48508192-48508193	del
48466793-48466795	48508192-48508194	del
48466794	48508193	C>A	c.139C>A	47	p.P47T	COSM9823493	1	Substitution - Missense	TREX1_ENST00000625293	ENST00000625293.2	No	DD191_Org	2749233	Stomach	Gastroesophageal junction	NS	Carcinoma	Adenocarcinoma	NS	29703791	-	Confirmed Somatic	Cultured	Heterozygous	3:48466794..48466794	c.304C>A	102	p.P102T	COSM9823493	1	Substitution - Missense	TREX1	ENST00000629913.3	No	DD191_Org	2749233	Stomach	Gastroesophageal junction	NS	Carcinoma	Adenocarcinoma	NS	29703791	-	Confirmed Somatic	Cultured	Heterozygous	3:48466794..48466794	c.109C>A
48466795		C>A
48466796	48508195	C>T
48466796-48466797		delinsTT	c.141_142delinsTT	48	p.P48S	COSM9823494	1	Substitution - Missense	TREX1_ENST00000625293	ENST00000625293.2	No	DD191_Org	2749233	Stomach	Gastroesophageal junction	NS	Carcinoma	Adenocarcinoma	NS	29703791	-	Confirmed Somatic	Cultured	Heterozygous	3:48466796..48466797	c.306_307delinsTT	103	p.P103S	COSM9823494	1	Substitution - Missense	TREX1	ENST00000629913.3	No	DD191_Org	2749233	Stomach	Gastroesophageal junction	NS	Carcinoma	Adenocarcinoma	NS	29703791	-	Confirmed Somatic	Cultured	Heterozygous	3:48466796..48466797	c.111_112delinsTT
48466797	48508196	C>T	c.142C>T	48	p.P48S	COSM7482364	1	Substitution - Missense	TREX1_ENST00000625293	ENST00000625293.2	No	TCGA-14-0866-01	2178121	Central nervous system	Brain	NS	Glioma	Astrocytoma Grade IV	Glioblastoma multiforme	-	329	Confirmed Somatic	Unknown	Unknown	3:48466797..48466797	c.307C>T	103	p.P103S	COSM7482364	1	Substitution - Missense	TREX1	ENST00000629913.3	No	TCGA-14-0866-01	2178121	Central nervous system	Brain	NS	Glioma	Astrocytoma Grade IV	Glioblastoma multiforme	-	329	Confirmed Somatic	Unknown	Unknown	3:48466797..48466797	c.112C>T
48466798	48508197	C>T
48466799	48508198	C>G
48466799	48508198	del
48466799	48508198	dup
48466799		C>A
48466799		del	c.144del	49	p.T49Pfs*16	COSM4613605	5	Deletion - Frameshift	TREX1_ENST00000625293	ENST00000625293.2	No	LIM2405;T207430;T242594;T390;155	2301994, 2658236, 2658263, 2658301, 2748127	Large intestine,Stomach	Colon,NS	Right,NS	Carcinoma	Adenocarcinoma,NS	NS	24755471,27149842,-	-,683	Previously Reported,Confirmed Somatic	Cultured,Unknown,Tumour Sample	Heterozygous,Unknown	3:48466799..48466799	c.309del	104	p.T104Pfs*16	COSM4613605	5	Deletion - Frameshift	TREX1	ENST00000629913.3	No	LIM2405;T207430;T242594;T390;155	2301994, 2658236, 2658263, 2658301, 2748127	Large intestine,Stomach	Colon,NS	Right,NS	Carcinoma	Adenocarcinoma,NS	NS	24755471,27149842,-	-,683	Previously Reported,Confirmed Somatic	Cultured,Unknown,Tumour Sample	Heterozygous,Unknown	3:48466799..48466799	c.114del
48466799-48466800		dup	c.144dup	49	p.T49Hfs*53	COSM4612154	5	Insertion - Frameshift	TREX1_ENST00000625293	ENST00000625293.2	No	T111; TCGA-CG-4442-01; HCA7; CC-UT-167T; T1849	2658341, 2198151, 2301976, 2856950, 2658271	Large intestine, Stomach, Kidney	NS, Colon	NS, Right	Carcinoma	Adenocarcinoma, Clear cell renal cell carcinoma	NS	27149842, -, 24755471, 32271170	-, 541	Confirmed Somatic, Previously Reported	Unknown, Cultured, Tumour Sample	Unknown, Heterozygous	3:48466799..48466800	c.309dup	104	p.T104Hfs*53	COSM4612154	5	Insertion - Frameshift	TREX1	ENST00000629913.3	No	T111; TCGA-CG-4442-01; HCA7; CC-UT-167T; T1849	2658341, 2198151, 2301976, 2856950, 2658271	Large intestine, Stomach, Kidney	NS, Colon	NS, Right	Carcinoma	Adenocarcinoma, Clear cell renal cell carcinoma	NS	27149842, -, 24755471, 32271170	-, 541	Confirmed Somatic, Previously Reported	Unknown, Cultured, Tumour Sample	Unknown, Heterozygous	3:48466799..48466800	c.114dup
48466800	48508199	A>C
48466800	48508199	A>G
48466801		del
48466801-48466802		delinsTT	c.146_147delinsTT	49	p.T49I	COSM9823495	1	Substitution - Missense	TREX1_ENST00000625293	ENST00000625293.2	No	DD191_Org	2749233	Stomach	Gastroesophageal junction	NS	Carcinoma	Adenocarcinoma	NS	29703791	-	Confirmed Somatic	Cultured	Heterozygous	3:48466801..48466802	c.311_312delinsTT	104	p.T104I	COSM9823495	1	Substitution - Missense	TREX1	ENST00000629913.3	No	DD191_Org	2749233	Stomach	Gastroesophageal junction	NS	Carcinoma	Adenocarcinoma	NS	29703791	-	Confirmed Somatic	Cultured	Heterozygous	3:48466801..48466802	c.116_117delinsTT
48466802-48466803	48508201-48508202	del
48466804		C>T	c.149C>T	50	p.S50F	COSM7341810	1	Substitution - Missense	TREX1_ENST00000625293	ENST00000625293.2	No	20	2766258	Salivary gland	Parotid	NS	Carcinoma	Mucoepidermoid carcinoma	NS	27340278	-	Confirmed Somatic	Tumour Sample	Unknown	3:48466804..48466804	c.314C>T	105	p.S105F	COSM7341810	1	Substitution - Missense	TREX1	ENST00000629913.3	No	20	2766258	Salivary gland	Parotid	NS	Carcinoma	Mucoepidermoid carcinoma	NS	27340278	-	Confirmed Somatic	Tumour Sample	Unknown	3:48466804..48466804	c.119C>T
48466805-48466806	48508204-48508205	del
48466806		C>T	c.151C>T	51	p.Q51*	COSM3070388	2	Substitution - Nonsense	TREX1_ENST00000625293	ENST00000625293.2	No	2857095; H1869	2857095, 2776250	Urinary tract, Lung	Bladder, NS	NS	Carcinoma	Transitional cell carcinoma, Squamous cell carcinoma	NS	25096233, 29681454	-	Confirmed Somatic, Previously Reported	Tumour Sample, Unknown	Unknown	3:48466806..48466806	c.316C>T	106	p.Q106*	COSM3070388	2	Substitution - Nonsense	TREX1	ENST00000629913.3	No	2857095; H1869	2857095, 2776250	Urinary tract, Lung	Bladder, NS	NS	Carcinoma	Transitional cell carcinoma, Squamous cell carcinoma	NS	25096233, 29681454	-	Confirmed Somatic, Previously Reported	Tumour Sample, Unknown	Unknown	3:48466806..48466806	c.121C>T
48466806-48466819	48508205-48508218	del
48466807	48508206	A>C
48466807	48508206	A>G
48466807-48466808	48508206-48508207	del
48466809		G>T
48466813-48466814		delinsAT	c.158_159delinsAT	53	p.P53H	COSM9823496	1	Substitution - Missense	TREX1_ENST00000625293	ENST00000625293.2	No	DD191_Org	2749233	Stomach	Gastroesophageal junction	NS	Carcinoma	Adenocarcinoma	NS	29703791	-	Confirmed Somatic	Cultured	Heterozygous	3:48466813..48466814	c.323_324delinsAT	108	p.P108H	COSM9823496	1	Substitution - Missense	TREX1	ENST00000629913.3	No	DD191_Org	2749233	Stomach	Gastroesophageal junction	NS	Carcinoma	Adenocarcinoma	NS	29703791	-	Confirmed Somatic	Cultured	Heterozygous	3:48466813..48466814	c.128_129delinsAT
48466816		C>A	c.161C>A	54	p.P54H	COSM4735870	2	Substitution - Missense	TREX1_ENST00000625293	ENST00000625293.2	No	T3202	2658288, 2296197	Large intestine	NS, Caecum	NS	Carcinoma	Adenocarcinoma	NS	27149842, 25344691	-	Confirmed Somatic	Unknown	Unknown	3:48466816..48466816	c.326C>A	109	p.P109H	COSM4735870	2	Substitution - Missense	TREX1	ENST00000629913.3	No	T3202	2658288, 2296197	Large intestine	NS, Caecum	NS	Carcinoma	Adenocarcinoma	NS	27149842, 25344691	-	Confirmed Somatic	Unknown	Unknown	3:48466816..48466816	c.131C>A
48466823		A>T
48466826		del
48466827	48508226	C>T
48466828	48508227	C>T
48466832		A>G
48466837	48508236	C>A
48466837	48508236	C>G
48466837	48508236	C>T
48466838	48508237	G>A
48466839	48508238	C>G
48466839	48508238	C>T
48466840	48508239	G>A
48466840	48508239	G>T
48466840		G>C
48466842	48508241	G>A
48466846	48508245	T>C
48466848-48466850	48508247-48508249	dup
48466851		A>T	c.196A>T	66	p.K66*	COSM140907	1	Substitution - Nonsense	TREX1_ENST00000625293	ENST00000625293.2	No	cSCCP8	1604874	Skin	Ear	NS	Carcinoma	Squamous cell carcinoma	NS	21984974	-	Confirmed Somatic	Tumour Sample	Unknown	3:48466851..48466851	c.361A>T	121	p.K121*	COSM140907	1	Substitution - Nonsense	TREX1	ENST00000629913.3	No	cSCCP8	1604874	Skin	Ear	NS	Carcinoma	Squamous cell carcinoma	NS	21984974	-	Confirmed Somatic	Tumour Sample	Unknown	3:48466851..48466851	c.166A>T
48466852	48508251	A>G
48466852		A>T	c.197A>T	66	p.K66M	COSM140908	1	Substitution - Missense	TREX1_ENST00000625293	ENST00000625293.2	No	cSCCP8	1604874	Skin	Ear	NS	Carcinoma	Squamous cell carcinoma	NS	21984974	-	Confirmed Somatic	Tumour Sample	Unknown	3:48466852..48466852	c.362A>T	121	p.K121M	COSM140908	1	Substitution - Missense	TREX1	ENST00000629913.3	No	cSCCP8	1604874	Skin	Ear	NS	Carcinoma	Squamous cell carcinoma	NS	21984974	-	Confirmed Somatic	Tumour Sample	Unknown	3:48466852..48466852	c.167A>T
48466853	48508252	G>A
48466857	48508256	T>G	c.202T>G	68	p.S68A	COSM7106482	1	Substitution - Missense	TREX1_ENST00000625293	ENST00000625293.2	No	TCGA-E7-A6MD-01	2385757	Urinary tract	Bladder	NS	Carcinoma	NS	NS	-	413	Confirmed Somatic	Tumour Sample	Unknown	3:48466857..48466857	c.367T>G	123	p.S123A	COSM7106482	1	Substitution - Missense	TREX1	ENST00000629913.3	No	TCGA-E7-A6MD-01	2385757	Urinary tract	Bladder	NS	Carcinoma	NS	NS	-	413	Confirmed Somatic	Tumour Sample	Unknown	3:48466857..48466857	c.172T>G
48466860-48466861	48508259-48508260	dup
48466861	48508260	del
48466861	48508260	T>C
48466861-48466862	48508260-48508261	del
48466862		G>A
48466863		T>C
48466864	48508263	G>C
48466865-48466866		inv	c.210_211inv	71	p.V71M	COSM9823497	1	Substitution - Missense	TREX1_ENST00000625293	ENST00000625293.2	No	DD191_Org	2749233	Stomach	Gastroesophageal junction	NS	Carcinoma	Adenocarcinoma	NS	29703791	-	Confirmed Somatic	Cultured	Heterozygous	3:48466865..48466866	c.375_376inv	126	p.V126M	COSM9823497	1	Substitution - Missense	TREX1	ENST00000629913.3	No	DD191_Org	2749233	Stomach	Gastroesophageal junction	NS	Carcinoma	Adenocarcinoma	NS	29703791	-	Confirmed Somatic	Cultured	Heterozygous	3:48466865..48466866	c.180_181inv
48466867	48508266	T>C
48466867-48466868	48508266-48508267	dup
48466873	48508272	C>T
48466874		G>A
48466877		G>A
48466879	48508278	A>G
48466881	48508280	G>T
48466881		dup
48466881-48466882	48508280-48508281	dup
48466882-48466889	48508281-48508288	del
48466883		dup
48466884	48508283	T>C
48466888		G>T	c.233G>T	78	p.S78I	COSM4735871	2	Substitution - Missense	TREX1_ENST00000625293	ENST00000625293.2	No	T407	2658314, 2296247	Large intestine	NS, Colon	NS, Transverse	Carcinoma	Adenocarcinoma	NS	27149842, 25344691	-	Confirmed Somatic	Unknown	Unknown	3:48466888..48466888	c.398G>T	133	p.S133I	COSM4735871	2	Substitution - Missense	TREX1	ENST00000629913.3	No	T407	2658314, 2296247	Large intestine	NS, Colon	NS, Transverse	Carcinoma	Adenocarcinoma	NS	27149842, 25344691	-	Confirmed Somatic	Unknown	Unknown	3:48466888..48466888	c.203G>T
48466891		C>T
48466891-48466898	48508290-48508297	dup
48466894-48466897	48508293-48508296	del
48466894-48466895		delinsGG	c.239_240delinsGG	80	p.A80G	COSM9823498	1	Substitution - Missense	TREX1_ENST00000625293	ENST00000625293.2	No	DD191_Org	2749233	Stomach	Gastroesophageal junction	NS	Carcinoma	Adenocarcinoma	NS	29703791	-	Confirmed Somatic	Cultured	Heterozygous	3:48466894..48466895	c.404_405delinsGG	135	p.A135G	COSM9823498	1	Substitution - Missense	TREX1	ENST00000629913.3	No	DD191_Org	2749233	Stomach	Gastroesophageal junction	NS	Carcinoma	Adenocarcinoma	NS	29703791	-	Confirmed Somatic	Cultured	Heterozygous	3:48466894..48466895	c.209_210delinsGG
48466895	48508294	dup
48466896		G>A
48466897	48508296	C>T
48466900		G>C
48466901	48508300	C>A
48466901		C>T
48466902	48508301	G>A
48466902		G>C
48466903		A>G
48466905	48508304	A>G
48466905		A>C
48466906	48508305	T>C
48466906	48508305	T>G
48466911		G>A
48466915	48508314	T>C
48466916	48508315	G>C
48466918	48508317	G>T
48466921		C>A	c.266C>A	89	p.T89K	COSM9812692	2	Substitution - Missense	TREX1_ENST00000625293	ENST00000625293.2	No	DD191_Org; DD107_Org	2749233, 2749229	Stomach	Gastroesophageal junction, NS	NS	Carcinoma	Adenocarcinoma	NS	29703791	-	Confirmed Somatic	Cultured	Heterozygous	3:48466921..48466921	c.431C>A	144	p.T144K	COSM9812692	2	Substitution - Missense	TREX1	ENST00000629913.3	No	DD191_Org; DD107_Org	2749233, 2749229	Stomach	Gastroesophageal junction, NS	NS	Carcinoma	Adenocarcinoma	NS	29703791	-	Confirmed Somatic	Cultured	Heterozygous	3:48466921..48466921	c.236C>A
48466921		C>T
48466923	48508322	G>A
48466926	48508325	G>C
48466926		G>T	c.271G>T	91	p.V91L	COSM3732496	1	Substitution - Missense	TREX1_ENST00000625293	ENST00000625293.2	No	258	2146918	Stomach	Gastroesophageal junction	NS	Carcinoma	Adenocarcinoma	NS	24308032	-	Confirmed Somatic	Tumour Sample	Unknown	3:48466926..48466926	c.436G>T	146	p.V146L	COSM3732496	1	Substitution - Missense	TREX1	ENST00000629913.3	No	258	2146918	Stomach	Gastroesophageal junction	NS	Carcinoma	Adenocarcinoma	NS	24308032	-	Confirmed Somatic	Tumour Sample	Unknown	3:48466926..48466926	c.241G>T
48466927		T>A	c.272T>A	91	p.V91E	COSM9812693	2	Substitution - Missense	TREX1_ENST00000625293	ENST00000625293.2	No	DD107_Org; DD191_Org	2749229, 2749233	Stomach	NS, Gastroesophageal junction	NS	Carcinoma	Adenocarcinoma	NS	29703791	-	Confirmed Somatic	Cultured	Heterozygous	3:48466927..48466927	c.437T>A	146	p.V146E	COSM9812693	2	Substitution - Missense	TREX1	ENST00000629913.3	No	DD107_Org; DD191_Org	2749229, 2749233	Stomach	NS, Gastroesophageal junction	NS	Carcinoma	Adenocarcinoma	NS	29703791	-	Confirmed Somatic	Cultured	Heterozygous	3:48466927..48466927	c.242T>A
48466932	48508331	G>A
48466932	48508331	G>C
48466933		C>A	c.278C>A	93	p.A93E	COSM5864709	2	Substitution - Missense	TREX1_ENST00000625293	ENST00000625293.2	No	Pat_06_A; DD191_Org	2513788, 2749233	NS, Stomach	NS, Gastroesophageal junction	NS	Malignant melanoma, Carcinoma	NS, Adenocarcinoma	NS	24265153, 29703791	-	Confirmed Somatic	Tumour Sample, Cultured	Unknown, Heterozygous	3:48466933..48466933	c.443C>A	148	p.A148E	COSM5864709	2	Substitution - Missense	TREX1	ENST00000629913.3	No	Pat_06_A; DD191_Org	2513788, 2749233	NS, Stomach	NS, Gastroesophageal junction	NS	Malignant melanoma, Carcinoma	NS, Adenocarcinoma	NS	24265153, 29703791	-	Confirmed Somatic	Tumour Sample, Cultured	Unknown, Heterozygous	3:48466933..48466933	c.248C>A
48466935		G>A	c.280G>A	94	p.A94T	COSM6807705	1	Substitution - Missense	TREX1_ENST00000625293	ENST00000625293.2	No	T1202	2658262	Large intestine	NS	NS	Carcinoma	Adenocarcinoma	NS	27149842	-	Confirmed Somatic	Unknown	Unknown	3:48466935..48466935	c.445G>A	149	p.A149T	COSM6807705	1	Substitution - Missense	TREX1	ENST00000629913.3	No	T1202	2658262	Large intestine	NS	NS	Carcinoma	Adenocarcinoma	NS	27149842	-	Confirmed Somatic	Unknown	Unknown	3:48466935..48466935	c.250G>A
48466936	48508335	C>T
48466936-48466937		delinsTA	c.281_282delinsTA	94	p.A94V	COSM9823499	1	Substitution - Missense	TREX1_ENST00000625293	ENST00000625293.2	No	DD191_Org	2749233	Stomach	Gastroesophageal junction	NS	Carcinoma	Adenocarcinoma	NS	29703791	-	Confirmed Somatic	Cultured	Heterozygous	3:48466936..48466937	c.446_447delinsTA	149	p.A149V	COSM9823499	1	Substitution - Missense	TREX1	ENST00000629913.3	No	DD191_Org	2749233	Stomach	Gastroesophageal junction	NS	Carcinoma	Adenocarcinoma	NS	29703791	-	Confirmed Somatic	Cultured	Heterozygous	3:48466936..48466937	c.251_252delinsTA
48466937		G>A
48466939	48508338	A>G
48466940		T>G	c.285T>G	95	p.H95Q	COSM9812694	2	Substitution - Missense	TREX1_ENST00000625293	ENST00000625293.2	No	DD191_Org; DD107_Org	2749233, 2749229	Stomach	Gastroesophageal junction, NS	NS	Carcinoma	Adenocarcinoma	NS	29703791	-	Confirmed Somatic	Cultured	Heterozygous	3:48466940..48466940	c.450T>G	150	p.H150Q	COSM9812694	2	Substitution - Missense	TREX1	ENST00000629913.3	No	DD191_Org; DD107_Org	2749233, 2749229	Stomach	Gastroesophageal junction, NS	NS	Carcinoma	Adenocarcinoma	NS	29703791	-	Confirmed Somatic	Cultured	Heterozygous	3:48466940..48466940	c.255T>G
48466941	48508340	G>A
48466941	48508340	G>T	c.286G>T	96	p.G96W	COSM8727782	1	Substitution - Missense	TREX1_ENST00000625293	ENST00000625293.2	No	TCGA-66-2754-01	1782524	Lung	NS	NS	Carcinoma	Squamous cell carcinoma	NS	-	418	Confirmed Somatic	Tumour Sample	Unknown	3:48466941..48466941	c.451G>T	151	p.G151W	COSM8727782	1	Substitution - Missense	TREX1	ENST00000629913.3	No	TCGA-66-2754-01	1782524	Lung	NS	NS	Carcinoma	Squamous cell carcinoma	NS	-	418	Confirmed Somatic	Tumour Sample	Unknown	3:48466941..48466941	c.256G>T
48466942	48508341	G>C
48466944	48508343	C>A
48466944	48508343	C>T
48466945	48508344	G>A
48466947		dup
48466947-48466948	48508346-48508347	dup
48466949	48508348	dup
48466949		A>G
48466949-48466950	48508348-48508349	dup
48466950		T>C	c.295T>C	99	p.C99R	COSM9812695	2	Substitution - Missense	TREX1_ENST00000625293	ENST00000625293.2	No	DD107_Org; DD191_Org	2749229, 2749233	Stomach	NS, Gastroesophageal junction	NS	Carcinoma	Adenocarcinoma	NS	29703791	-	Confirmed Somatic	Cultured	Heterozygous	3:48466950..48466950	c.460T>C	154	p.C154R	COSM9812695	2	Substitution - Missense	TREX1	ENST00000629913.3	No	DD107_Org; DD191_Org	2749229, 2749233	Stomach	NS, Gastroesophageal junction	NS	Carcinoma	Adenocarcinoma	NS	29703791	-	Confirmed Somatic	Cultured	Heterozygous	3:48466950..48466950	c.265T>C
48466951	48508350	G>A
48466954	48508353	T>C
48466955	48508354	T>A
48466956	48508355	G>A	c.301G>A	101	p.D101N	COSM7671315	1	Substitution - Missense	TREX1_ENST00000625293	ENST00000625293.2	No	TCGA-3C-AALI-01	2386094	Breast	NS	NS	Carcinoma	NS	NS	-	414	Confirmed Somatic	Tumour Sample	Unknown	3:48466956..48466956	c.466G>A	156	p.D156N	COSM7671315	1	Substitution - Missense	TREX1	ENST00000629913.3	No	TCGA-3C-AALI-01	2386094	Breast	NS	NS	Carcinoma	NS	NS	-	414	Confirmed Somatic	Tumour Sample	Unknown	3:48466956..48466956	c.271G>A
48466956	48508355	G>C	c.301G>C	101	p.D101H	COSM7148075	1	Substitution - Missense	TREX1_ENST00000625293	ENST00000625293.2	No	TCGA-SY-A9G5-01	2340129	Urinary tract	Bladder	NS	Carcinoma	NS	NS	-	413	Confirmed Somatic	Tumour Sample	Unknown	3:48466956..48466956	c.466G>C	156	p.D156H	COSM7148075	1	Substitution - Missense	TREX1	ENST00000629913.3	No	TCGA-SY-A9G5-01	2340129	Urinary tract	Bladder	NS	Carcinoma	NS	NS	-	413	Confirmed Somatic	Tumour Sample	Unknown	3:48466956..48466956	c.271G>C
48466958		T>C
48466959		G>A	c.304G>A	102	p.D102N	COSM165117	1	Substitution - Missense	TREX1_ENST00000625293	ENST00000625293.2	No	PD4137a	1331107	Breast	NS	NS	Carcinoma	NS	NS	22722201	385	Confirmed Somatic	Tumour Sample	Unknown	3:48466959..48466959	c.469G>A	157	p.D157N	COSM165117	1	Substitution - Missense	TREX1	ENST00000629913.3	No	PD4137a	1331107	Breast	NS	NS	Carcinoma	NS	NS	22722201	385	Confirmed Somatic	Tumour Sample	Unknown	3:48466959..48466959	c.274G>A
48466961		C>T
48466963	48508362	A>T
48466964		C>T
48466965		C>T
48466966		T>C
48466967	48508366	G>C
48466967		G>A
48466968		G>A	c.313G>A	105	p.A105T	COSM1734721	1	Substitution - Missense	TREX1_ENST00000625293	ENST00000625293.2	No	ACINAR01	2068112	Pancreas	NS	NS	Carcinoma	Acinar carcinoma	NS	24293293	-	Confirmed Somatic	Tumour Sample	Unknown	3:48466968..48466968	c.478G>A	160	p.A160T	COSM1734721	1	Substitution - Missense	TREX1	ENST00000629913.3	No	ACINAR01	2068112	Pancreas	NS	NS	Carcinoma	Acinar carcinoma	NS	24293293	-	Confirmed Somatic	Tumour Sample	Unknown	3:48466968..48466968	c.283G>A
48466970		C>T
48466972	48508371	A>G
48466972		A>T	c.317A>T	106	p.N106I	COSM9823500	1	Substitution - Missense	TREX1_ENST00000625293	ENST00000625293.2	No	DD191_Org	2749233	Stomach	Gastroesophageal junction	NS	Carcinoma	Adenocarcinoma	NS	29703791	-	Confirmed Somatic	Cultured	Heterozygous	3:48466972..48466972	c.482A>T	161	p.N161I	COSM9823500	1	Substitution - Missense	TREX1	ENST00000629913.3	No	DD191_Org	2749233	Stomach	Gastroesophageal junction	NS	Carcinoma	Adenocarcinoma	NS	29703791	-	Confirmed Somatic	Cultured	Heterozygous	3:48466972..48466972	c.287A>T
48466981		T>G	c.326T>G	109	p.L109R	COSM9823501	1	Substitution - Missense	TREX1_ENST00000625293	ENST00000625293.2	No	DD191_Org	2749233	Stomach	Gastroesophageal junction	NS	Carcinoma	Adenocarcinoma	NS	29703791	-	Confirmed Somatic	Cultured	Heterozygous	3:48466981..48466981	c.491T>G	164	p.L164R	COSM9823501	1	Substitution - Missense	TREX1	ENST00000629913.3	No	DD191_Org	2749233	Stomach	Gastroesophageal junction	NS	Carcinoma	Adenocarcinoma	NS	29703791	-	Confirmed Somatic	Cultured	Heterozygous	3:48466981..48466981	c.296T>G
48466984	48508383	C>G
48466985		C>T
48466989		C>T
48466992	48508391	C>G
48466992	48508391	C>T
48466993	48508392	G>A	c.338G>A	113	p.R113Q	COSM9823502	1	Substitution - Missense	TREX1_ENST00000625293	ENST00000625293.2	No	DD191_Org	2749233	Stomach	Gastroesophageal junction	NS	Carcinoma	Adenocarcinoma	NS	29703791	-	Confirmed Somatic	Cultured	Heterozygous	3:48466993..48466993	c.503G>A	168	p.R168Q	COSM9823502	1	Substitution - Missense	TREX1	ENST00000629913.3	No	DD191_Org	2749233	Stomach	Gastroesophageal junction	NS	Carcinoma	Adenocarcinoma	NS	29703791	-	Confirmed Somatic	Cultured	Heterozygous	3:48466993..48466993	c.308G>A
48466994	48508393	G>A
48466995	48508394	C>T
48466996	48508395	G>A
48466998		C>T	c.343C>T	115	p.Q115*	COSM4005556	1	Substitution - Nonsense	TREX1_ENST00000625293	ENST00000625293.2	No	B25-Tumor	2185752	Urinary tract	Bladder	NS	Carcinoma	NS	NS	-	581	Confirmed Somatic	Unknown	Unknown	3:48466998..48466998	c.508C>T	170	p.Q170*	COSM4005556	1	Substitution - Nonsense	TREX1	ENST00000629913.3	No	B25-Tumor	2185752	Urinary tract	Bladder	NS	Carcinoma	NS	NS	-	581	Confirmed Somatic	Unknown	Unknown	3:48466998..48466998	c.313C>T
48467000	48508399	G>T
48467001	48508400	C>G
48467002	48508401	C>T
48467003	48508402	A>G
48467005		A>G
48467012	48508411	G>A
48467012		G>C	c.357G>C	119	p.W119C	COSM9823503	1	Substitution - Missense	TREX1_ENST00000625293	ENST00000625293.2	No	DD191_Org	2749233	Stomach	Gastroesophageal junction	NS	Carcinoma	Adenocarcinoma	NS	29703791	-	Confirmed Somatic	Cultured	Heterozygous	3:48467012..48467012	c.522G>C	174	p.W174C	COSM9823503	1	Substitution - Missense	TREX1	ENST00000629913.3	No	DD191_Org	2749233	Stomach	Gastroesophageal junction	NS	Carcinoma	Adenocarcinoma	NS	29703791	-	Confirmed Somatic	Cultured	Heterozygous	3:48467012..48467012	c.327G>C
48467016		C>T
48467020	48508419	T>C
48467021-48467023	48508420-48508422	dup
48467022	48508421	G>C	c.367G>C	123	p.A123P	COSM7156324	1	Substitution - Missense	TREX1_ENST00000625293	ENST00000625293.2	No	TCGA-UY-A9PF-01	2385786	Urinary tract	Bladder	NS	Carcinoma	NS	NS	-	413	Confirmed Somatic	Tumour Sample	Unknown	3:48467022..48467022	c.532G>C	178	p.A178P	COSM7156324	1	Substitution - Missense	TREX1	ENST00000629913.3	No	TCGA-UY-A9PF-01	2385786	Urinary tract	Bladder	NS	Carcinoma	NS	NS	-	413	Confirmed Somatic	Tumour Sample	Unknown	3:48467022..48467022	c.337G>C
48467024		A>C
48467024		A>G
48467025	48508424	C>G
48467029	48508428	A>G
48467029-48467030	48508428-48508429	dup
48467030	48508429	dup
48467030	48508429	T>C
48467035	48508434	A>T
48467036		C>A	c.381C>A	127	p.D127E	COSM382883	1	Substitution - Missense	TREX1_ENST00000625293	ENST00000625293.2	No	LUAD-RT-S01810	1765179	Lung	NS	NS	Carcinoma	Adenocarcinoma	NS	22980975	-	Variant of unknown origin	Tumour Sample	Unknown	3:48467036..48467036	c.546C>A	182	p.D182E	COSM382883	1	Substitution - Missense	TREX1	ENST00000629913.3	No	LUAD-RT-S01810	1765179	Lung	NS	NS	Carcinoma	Adenocarcinoma	NS	22980975	-	Variant of unknown origin	Tumour Sample	Unknown	3:48467036..48467036	c.351C>A
48467037	48508436	C>T
48467038	48508437	G>A
48467042	48508441	C>T
48467043	48508442	G>A
48467043	48508442	G>C
48467046	48508445	T>G
48467046		T>C
48467047-48467048	48508446-48508447	dup
48467048	48508447	C>G
48467048	48508447	del
48467048-48467063	48508447-48508462	dup
48467049	48508448	C>A
48467049	48508448	C>G
48467049	48508448	C>T
48467052	48508451	del
48467052		C>G
48467053-48467054	48508452-48508453	dup
48467055	48508454	C>T
48467058	48508457	C>G
48467058	48508457	C>T
48467059		A>G
48467062	48508461	C>T
48467063		A>C
48467065	48508464	A>C
48467067	48508466	C>G
48467068		del
48467070		del
48467070-48467071	48508469-48508470	del
48467070-48467071		del
48467071	48508470	del
48467072	48508471	T>C
48467073	48508472	A>G	c.418A>G	140	p.M140V	COSM4602096	1	Substitution - Missense	TREX1_ENST00000625293	ENST00000625293.2	No	WSU-HN6	2296295	Upper aerodigestive tract	Head neck	NS	Carcinoma	Squamous cell carcinoma	NS	25275298	-	Variant of unknown origin	Cultured	Unknown	3:48467073..48467073	c.583A>G	195	p.M195V	COSM4602096	1	Substitution - Missense	TREX1	ENST00000629913.3	No	WSU-HN6	2296295	Upper aerodigestive tract	Head neck	NS	Carcinoma	Squamous cell carcinoma	NS	25275298	-	Variant of unknown origin	Cultured	Unknown	3:48467073..48467073	c.388A>G
48467074	48508473	T>C
48467075		G>A	c.420G>A	140	p.M140I	COSM9979299	1	Substitution - Missense	TREX1_ENST00000625293	ENST00000625293.2	No	EOSRC-IN-2497	2902090	Large intestine	Rectum	NS	Carcinoma	Adenocarcinoma	NS	33262464	-	Confirmed Somatic	Tumour Sample	Unknown	3:48467075..48467075	c.585G>A	195	p.M195I	COSM9979299	1	Substitution - Missense	TREX1	ENST00000629913.3	No	EOSRC-IN-2497	2902090	Large intestine	Rectum	NS	Carcinoma	Adenocarcinoma	NS	33262464	-	Confirmed Somatic	Tumour Sample	Unknown	3:48467075..48467075	c.390G>A
48467082	48508481	C>G
48467084	48508483	C>T
48467085	48508484	A>T
48467089	48508488	G>A
48467095		T>A
48467101	48508500	G>C
48467101	48508500	G>T
48467103		G>A	c.448G>A	150	p.A150T	COSM6807708	1	Substitution - Missense	TREX1_ENST00000625293	ENST00000625293.2	No	T335135	2658230	Large intestine	NS	NS	Carcinoma	Adenocarcinoma	NS	27149842	-	Confirmed Somatic	Unknown	Unknown	3:48467103..48467103	c.613G>A	205	p.A205T	COSM6807708	1	Substitution - Missense	TREX1	ENST00000629913.3	No	T335135	2658230	Large intestine	NS	NS	Carcinoma	Adenocarcinoma	NS	27149842	-	Confirmed Somatic	Unknown	Unknown	3:48467103..48467103	c.418G>A
48467108	48508507	C>G
48467114		G>A
48467117	48508516	T>C
48467118	48508517	A>G
48467119	48508518	G>C	c.464G>C	155	p.S155T	COSM7760783	1	Substitution - Missense	TREX1_ENST00000625293	ENST00000625293.2	No	TCGA-67-3771-01	1780201	Lung	NS	NS	Carcinoma	Adenocarcinoma	NS	-	417	Confirmed Somatic	Tumour Sample	Unknown	3:48467119..48467119	c.629G>C	210	p.S210T	COSM7760783	1	Substitution - Missense	TREX1	ENST00000629913.3	No	TCGA-67-3771-01	1780201	Lung	NS	NS	Carcinoma	Adenocarcinoma	NS	-	417	Confirmed Somatic	Tumour Sample	Unknown	3:48467119..48467119	c.434G>C
48467122	48508521	del
48467123	48508522	C>G
48467123	48508522	C>T
48467124	48508523	A>G
48467125	48508524	C>G
48467128	48508527	C>T
48467129		G>A
48467132		G>A
48467133	48508532	A>C
48467134		A>T
48467141	48508540	G>A
48467143		A>G	c.488A>G	163	p.E163G	COSM5014338	1	Substitution - Missense	TREX1_ENST00000625293	ENST00000625293.2	No	61	2370253	Kidney	NS	NS	Carcinoma	Papillary renal cell carcinoma	NS	25401301	-	Confirmed Somatic	Tumour Sample	Unknown	3:48467143..48467143	c.653A>G	218	p.E218G	COSM5014338	1	Substitution - Missense	TREX1	ENST00000629913.3	No	61	2370253	Kidney	NS	NS	Carcinoma	Papillary renal cell carcinoma	NS	25401301	-	Confirmed Somatic	Tumour Sample	Unknown	3:48467143..48467143	c.458A>G
48467145	48508544	C>T
48467146	48508545	G>A	c.491G>A	164	p.R164Q	COSM6807706	2	Substitution - Missense	TREX1_ENST00000625293	ENST00000625293.2	No	TCGA-MV-A51V-01; T1791	2193279, 2658246	Urinary tract, Large intestine	Bladder, NS	NS	Carcinoma	NS, Adenocarcinoma	NS	-, 27149842	413, -	Confirmed Somatic	Unknown	Unknown	3:48467146..48467146	c.656G>A	219	p.R219Q	COSM6807706	2	Substitution - Missense	TREX1	ENST00000629913.3	No	TCGA-MV-A51V-01; T1791	2193279, 2658246	Urinary tract, Large intestine	Bladder, NS	NS	Carcinoma	NS, Adenocarcinoma	NS	-, 27149842	413, -	Confirmed Somatic	Unknown	Unknown	3:48467146..48467146	c.461G>A
48467146	48508545	G>C
48467149	48508548	C>A
48467152	48508551	G>C
48467154		del
48467155	48508554	del
48467155	48508554	G>A
48467156	48508555	C>T
48467159		C>G
48467161		C>G	c.506C>G	169	p.S169*	COSM3373211	1	Substitution - Nonsense	TREX1_ENST00000625293	ENST00000625293.2	No	TCGA-DE-A0Y3-01	2121854	Thyroid	NS	NS	Carcinoma	NS	NS	-	542	Confirmed Somatic	Unknown	Unknown	3:48467161..48467161	c.671C>G	224	p.S224*	COSM3373211	1	Substitution - Nonsense	TREX1	ENST00000629913.3	No	TCGA-DE-A0Y3-01	2121854	Thyroid	NS	NS	Carcinoma	NS	NS	-	542	Confirmed Somatic	Unknown	Unknown	3:48467161..48467161	c.476C>G
48467163	48508562	G>A
48467163	48508562	G>T
48467164	48508563	A>G
48467168	48508567	del
48467168		C>T
48467169	48508568	G>A	c.514G>A	172	p.G172S	COSM323974	2	Substitution - Missense	TREX1_ENST00000625293	ENST00000625293.2	No	19; 2334193	2497130, 1759433	Pancreas, Lung	Ampulla of Vater, NS	NS	Carcinoma	NS, Small cell carcinoma	NS	26806338, 22941189	-	Confirmed Somatic, Previously Reported	Tumour Sample, Cultured	Unknown	3:48467169..48467169	c.679G>A	227	p.G227S	COSM323974	2	Substitution - Missense	TREX1	ENST00000629913.3	No	19; 2334193	2497130, 1759433	Pancreas, Lung	Ampulla of Vater, NS	NS	Carcinoma	NS, Small cell carcinoma	NS	26806338, 22941189	-	Confirmed Somatic, Previously Reported	Tumour Sample, Cultured	Unknown	3:48467169..48467169	c.484G>A
48467172		C>T
48467175	48508574	A>G
48467176		G>A
48467177		G>A
48467180	48508579	G>C	c.525G>C	175	p.K175N	COSM7110899	1	Substitution - Missense	TREX1_ENST00000625293	ENST00000625293.2	No	TCGA-E7-A7DV-01	2193219	Urinary tract	Bladder	NS	Carcinoma	NS	NS	-	413	Confirmed Somatic	Unknown	Unknown	3:48467180..48467180	c.690G>C	230	p.K230N	COSM7110899	1	Substitution - Missense	TREX1	ENST00000629913.3	No	TCGA-E7-A7DV-01	2193219	Urinary tract	Bladder	NS	Carcinoma	NS	NS	-	413	Confirmed Somatic	Unknown	Unknown	3:48467180..48467180	c.495G>C
48467180	48508579	G>T	c.525G>T	175	p.K175N	COSM8034255	1	Substitution - Missense	TREX1_ENST00000625293	ENST00000625293.2	No	TCGA-ER-A19Q-06	2121727	Skin	NS	NS	Malignant melanoma	NS	NS	-	540	Confirmed Somatic	Unknown	Unknown	3:48467180..48467180	c.690G>T	230	p.K230N	COSM8034255	1	Substitution - Missense	TREX1	ENST00000629913.3	No	TCGA-ER-A19Q-06	2121727	Skin	NS	NS	Malignant melanoma	NS	NS	-	540	Confirmed Somatic	Unknown	Unknown	3:48467180..48467180	c.495G>T
48467181	48508580	A>G
48467182	48508581	G>T
48467185	48508584	A>G	c.530A>G	177	p177C	COSM8522230	1	Substitution - Missense	TREX1_ENST00000625293	ENST00000625293.2	No	36	2748008	Stomach	NS	NS	Carcinoma	NS	NS	-	683	Confirmed Somatic	Tumour Sample	Unknown	3:48467185..48467185	c.695A>G	232	p232C	COSM8522230	1	Substitution - Missense	TREX1	ENST00000629913.3	No	36	2748008	Stomach	NS	NS	Carcinoma	NS	NS	-	683	Confirmed Somatic	Tumour Sample	Unknown	3:48467185..48467185	c.500A>G
48467185-48467186		insCAGCCTAGGCAGCGCTA	c.530_531insCAGCCTAGGCAGCGCTA	182	p.I182Afs*4	COSM9430711	1	Insertion - Frameshift	TREX1_ENST00000625293	ENST00000625293.2	No	EXTERN_MELA_20140505_038	2839416	Skin	Ear	NS	Malignant melanoma	NS	NS	28467829	-	Confirmed Somatic	Tumour Sample	Unknown	3:48467185..48467186	c.695_696insCAGCCTAGGCAGCGCTA	237	p.I237Afs*4	COSM9430711	1	Insertion - Frameshift	TREX1	ENST00000629913.3	No	EXTERN_MELA_20140505_038	2839416	Skin	Ear	NS	Malignant melanoma	NS	NS	28467829	-	Confirmed Somatic	Tumour Sample	Unknown	3:48467185..48467186	c.500_501insCAGCCTAGGCAGCGCTA
48467186	48508585	C>T
48467186		T>C
48467191	48508590	T>C
48467193		G>A	c.538G>A	180	p.G180S	COSM139455	1	Substitution - Missense	TREX1_ENST00000625293	ENST00000625293.2	No	cSCCP7	1604873	Skin	Face	NS	Carcinoma	Squamous cell carcinoma	NS	21984974	-	Confirmed Somatic	Tumour Sample	Unknown	3:48467193..48467193	c.703G>A	235	p.G235S	COSM139455	1	Substitution - Missense	TREX1	ENST00000629913.3	No	cSCCP7	1604873	Skin	Face	NS	Carcinoma	Squamous cell carcinoma	NS	21984974	-	Confirmed Somatic	Tumour Sample	Unknown	3:48467193..48467193	c.508G>A
48467195		C>A
48467195-48467196	48508594-48508595	dup
48467198	48508597	C>T
48467201		C>G	c.546C>G	182	p.I182M	COSM9595112	1	Substitution - Missense	TREX1_ENST00000625293	ENST00000625293.2	No	S01496	2864349	Lung	NS	NS	Carcinoma	Large cell neuroendocrine carcinoma	NS	29535388	-	Confirmed Somatic	Tumour Sample	Unknown	3:48467201..48467201	c.711C>G	237	p.I237M	COSM9595112	1	Substitution - Missense	TREX1	ENST00000629913.3	No	S01496	2864349	Lung	NS	NS	Carcinoma	Large cell neuroendocrine carcinoma	NS	29535388	-	Confirmed Somatic	Tumour Sample	Unknown	3:48467201..48467201	c.516C>G
48467203	48508602	A>G
48467206		C>T	c.551C>T	184	p.T184I	COSM5615293	1	Substitution - Missense	TREX1_ENST00000625293	ENST00000625293.2	No	LU-1991	2478820	Lung	NS	NS	Carcinoma	Adenocarcinoma	NS	22510280	-	Confirmed Somatic	Tumour Sample	Unknown	3:48467206..48467206	c.716C>T	239	p.T239I	COSM5615293	1	Substitution - Missense	TREX1	ENST00000629913.3	No	LU-1991	2478820	Lung	NS	NS	Carcinoma	Adenocarcinoma	NS	22510280	-	Confirmed Somatic	Tumour Sample	Unknown	3:48467206..48467206	c.521C>T
48467208	48508607	C>T
48467208		C>G
48467209	48508608	G>A
48467210		C>T
48467211		C>T
48467213	48508612	G>A
48467217		G>A
48467226	48508625	C>A	c.571C>A	191	p.P191T	COSM7989177	1	Substitution - Missense	TREX1_ENST00000625293	ENST00000625293.2	No	TCGA-D3-A1Q3-06	2121499	Skin	NS	NS	Malignant melanoma	NS	NS	-	540	Confirmed Somatic	Unknown	Unknown	3:48467226..48467226	c.736C>A	246	p.P246T	COSM7989177	1	Substitution - Missense	TREX1	ENST00000629913.3	No	TCGA-D3-A1Q3-06	2121499	Skin	NS	NS	Malignant melanoma	NS	NS	-	540	Confirmed Somatic	Unknown	Unknown	3:48467226..48467226	c.541C>A
48467233	48508632	A>G
48467236	48508635	C>T
48467236	48508635	del
48467237		G>A
48467241	48508640	A>G
48467242	48508641	C>T
48467243		G>A
48467245	48508644	C>T
48467246		T>C
48467247	48508646	G>A
48467251		dup
48467253	48508652	G>A
48467253	48508652	G>C
48467253		dup
48467253-48467254	48508652-48508653	dup
48467254-48467256	48508653-48508655	dup
48467257	48508656	T>A
48467260	48508659	T>G
48467262	48508661	G>A
48467263	48508662	C>T
48467264-48467317	48508663-48508716	dup
48467271	48508670	A>G
48467272	48508671	G>A
48467275-48467276	48508674-48508675	del
48467276	48508675	C>G
48467276		C>T
48467277		dup
48467277-48467278	48508676-48508677	dup
48467278	48508677	G>C
48467280		C>A
48467280-48467283	48508679-48508682	dup
48467281		A>G	c.626A>G	209	p.Q209R	COSM6807709	1	Substitution - Missense	TREX1_ENST00000625293	ENST00000625293.2	No	T3422	2658323	Large intestine	NS	NS	Carcinoma	Adenocarcinoma	NS	27149842	-	Confirmed Somatic	Unknown	Unknown	3:48467281..48467281	c.791A>G	264	p.Q264R	COSM6807709	1	Substitution - Missense	TREX1	ENST00000629913.3	No	T3422	2658323	Large intestine	NS	NS	Carcinoma	Adenocarcinoma	NS	27149842	-	Confirmed Somatic	Unknown	Unknown	3:48467281..48467281	c.596A>G
48467282	48508681	G>C
48467282		G>A
48467283	48508682	T>C	c.628T>C	210	p.W210R	COSM480210	1	Substitution - Missense	TREX1_ENST00000625293	ENST00000625293.2	No	TCGA-CJ-5682-01	1779994	Kidney	NS	NS	Carcinoma	Clear cell renal cell carcinoma	NS	-	416	Confirmed Somatic	Tumour Sample	Unknown	3:48467283..48467283	c.793T>C	265	p.W265R	COSM480210	1	Substitution - Missense	TREX1	ENST00000629913.3	No	TCGA-CJ-5682-01	1779994	Kidney	NS	NS	Carcinoma	Clear cell renal cell carcinoma	NS	-	416	Confirmed Somatic	Tumour Sample	Unknown	3:48467283..48467283	c.598T>C
48467284	48508683	G>A
48467287	48508686	G>A
48467287	48508686	G>T
48467288	48508687	A>C
48467288		A>G
48467288		del
48467289	48508688	del
48467290	48508689	del
48467293	48508692	A>G
48467295	48508694	G>A
48467300		G>A
48467302	48508701	T>C
48467304	48508703	C>T
48467305	48508704	G>A
48467306	48508705	G>A
48467308	48508707	G>T	c.653G>T	218	p.W218L	COSM8114019	1	Substitution - Missense	TREX1_ENST00000625293	ENST00000625293.2	No	TCGA-D3-A3C6-06	2121528	Skin	NS	NS	Malignant melanoma	NS	NS	-	540	Confirmed Somatic	Unknown	Unknown	3:48467308..48467308	c.818G>T	273	p.W273L	COSM8114019	1	Substitution - Missense	TREX1	ENST00000629913.3	No	TCGA-D3-A3C6-06	2121528	Skin	NS	NS	Malignant melanoma	NS	NS	-	540	Confirmed Somatic	Unknown	Unknown	3:48467308..48467308	c.623G>T
48467309		G>C	c.654G>C	218	p.W218C	COSM1617721	2	Substitution - Missense	TREX1_ENST00000625293	ENST00000625293.2	No	HCC71T; HCC71	1919230, 2120874	Liver	NS	NS	Carcinoma	NS	NS	-	323	Previously Reported, Confirmed Somatic	Tumour Sample, Unknown	Heterozygous, Unknown	3:48467309..48467309	c.819G>C	273	p.W273C	COSM1617721	2	Substitution - Missense	TREX1	ENST00000629913.3	No	HCC71T; HCC71	1919230, 2120874	Liver	NS	NS	Carcinoma	NS	NS	-	323	Previously Reported, Confirmed Somatic	Tumour Sample, Unknown	Heterozygous, Unknown	3:48467309..48467309	c.624G>C
48467310		G>A
48467314	48508713	A>G
48467321	48508720	C>A
48467321	48508720	C>G
48467322	48508721	G>A
48467324		C>T
48467326		G>T	c.671G>T	224	p.R224M	COSM4118202	1	Substitution - Missense	TREX1_ENST00000625293	ENST00000625293.2	No	TCGA-CD-A4MG-01	2198123	Stomach	NS	NS	Carcinoma	Adenocarcinoma	NS	-	541	Confirmed Somatic	Unknown	Unknown	3:48467326..48467326	c.836G>T	279	p.R279M	COSM4118202	1	Substitution - Missense	TREX1	ENST00000629913.3	No	TCGA-CD-A4MG-01	2198123	Stomach	NS	NS	Carcinoma	Adenocarcinoma	NS	-	541	Confirmed Somatic	Unknown	Unknown	3:48467326..48467326	c.641G>T
48467331	48508730	T>C
48467333	48508732	C>G
48467333		C>T
48467334	48508733	G>A
48467338		C>T
48467338		dup
48467339	48508738	C>A
48467340	48508739	A>G
48467345	48508744	G>C
48467345		G>A
48467348	48508747	dup
48467349	48508748	A>G
48467350	48508749	T>G
48467351		G>T
48467354-48467355	48508753-48508754	dup
48467355	48508754	G>T
48467357-48467358	48508756-48508757	dup
48467358	48508757	dup
48467358-48467359		dup	c.703dup	235	p.V235Gfs*6	COSM10051203	1	Insertion - Frameshift	TREX1_ENST00000625293	ENST00000625293.2	No	CRC237	2730815	Large intestine	Colon	NS	Carcinoma	Adenocarcinoma	NS	26416732	-	Confirmed Somatic	Cultured	Unknown	3:48467358..48467359	c.868dup	290	p.V290Gfs*6	COSM10051203	1	Insertion - Frameshift	TREX1	ENST00000629913.3	No	CRC237	2730815	Large intestine	Colon	NS	Carcinoma	Adenocarcinoma	NS	26416732	-	Confirmed Somatic	Cultured	Unknown	3:48467358..48467359	c.673dup
48467359	48508758	T>G
48467361	48508760	A>G	c.706A>G	236	p.T236A	COSM8316010	1	Substitution - Missense	TREX1_ENST00000625293	ENST00000625293.2	No	TCGA-F7-A624-01	2193851	Upper aerodigestive tract	Head neck	NS	Carcinoma	Squamous cell carcinoma	NS	-	627	Confirmed Somatic	Unknown	Unknown	3:48467361..48467361	c.871A>G	291	p.T291A	COSM8316010	1	Substitution - Missense	TREX1	ENST00000629913.3	No	TCGA-F7-A624-01	2193851	Upper aerodigestive tract	Head neck	NS	Carcinoma	Squamous cell carcinoma	NS	-	627	Confirmed Somatic	Unknown	Unknown	3:48467361..48467361	c.676A>G
48467361	48508760	A>T	c.706A>T	236	p.T236S	COSM3993122	1	Substitution - Missense	TREX1_ENST00000625293	ENST00000625293.2	No	TCGA-A4-7585-01	2194073	Kidney	NS	NS	Carcinoma	Papillary renal cell carcinoma	NS	-	543	Confirmed Somatic	Unknown	Unknown	3:48467361..48467361	c.871A>T	291	p.T291S	COSM3993122	1	Substitution - Missense	TREX1	ENST00000629913.3	No	TCGA-A4-7585-01	2194073	Kidney	NS	NS	Carcinoma	Papillary renal cell carcinoma	NS	-	543	Confirmed Somatic	Unknown	Unknown	3:48467361..48467361	c.676A>T
48467361	48508760	dup
48467369		T>G
48467374	48508773	G>A
48467375	48508774	G>A
48467375	48508774	G>C
48467376		A>T
48467381		G>A
48467383	48508782	C>G
48467388	48508787	C>T
48467388		dup
48467389	48508788	C>G
48467389		C>T	c.734C>T	245	p.P245L	COSM3070402	1	Substitution - Missense	TREX1_ENST00000625293	ENST00000625293.2	No	KM12	2301990	Large intestine	NS	NS	Carcinoma	Adenocarcinoma	NS	24755471	-	Variant of unknown origin	Cultured	Heterozygous	3:48467389..48467389	c.899C>T	300	p.P300L	COSM3070402	1	Substitution - Missense	TREX1	ENST00000629913.3	No	KM12	2301990	Large intestine	NS	NS	Carcinoma	Adenocarcinoma	NS	24755471	-	Variant of unknown origin	Cultured	Heterozygous	3:48467389..48467389	c.704C>T
48467390		A>C
48467393		T>G
48467394	48508793	G>A
48467394	48508793	G>C
48467395	48508794	C>T	c.740C>T	247	p.A247V	COSM6807710	1	Substitution - Missense	TREX1_ENST00000625293	ENST00000625293.2	No	T3646	2658258	Large intestine	NS	NS	Carcinoma	Adenocarcinoma	NS	27149842	-	Confirmed Somatic	Unknown	Unknown	3:48467395..48467395	c.905C>T	302	p.A302V	COSM6807710	1	Substitution - Missense	TREX1	ENST00000629913.3	No	T3646	2658258	Large intestine	NS	NS	Carcinoma	Adenocarcinoma	NS	27149842	-	Confirmed Somatic	Unknown	Unknown	3:48467395..48467395	c.710C>T
48467398-48467401	48508797-48508800	dup
48467401	48508800	C>T
48467401		C>A
48467401-48467402	48508800-48508801	dup
48467404	48508803	C>T
48467404		C>G	c.749C>G	250	p.T250S	COSM9230296	1	Substitution - Missense	TREX1_ENST00000625293	ENST00000625293.2	No	F69_329967	2815722	Large intestine	Rectum	NS	Carcinoma	Adenocarcinoma	NS	31660073	-	Confirmed Somatic	Tumour Sample	Unknown	3:48467404..48467404	c.914C>G	305	p.T305S	COSM9230296	1	Substitution - Missense	TREX1	ENST00000629913.3	No	F69_329967	2815722	Large intestine	Rectum	NS	Carcinoma	Adenocarcinoma	NS	31660073	-	Confirmed Somatic	Tumour Sample	Unknown	3:48467404..48467404	c.719C>G
48467407	48508806	C>T
48467412	48508811	C>G
48467412	48508811	C>T
48467413	48508812	A>G
48467415		C>G	c.760C>G	254	p.L254V	COSM1162199	1	Substitution - Missense	TREX1_ENST00000625293	ENST00000625293.2	No	PA018	1820268	Pancreas	NS	NS	Carcinoma	Ductal carcinoma	NS	22156295	-	Confirmed Somatic	Cultured	Unknown	3:48467415..48467415	c.925C>G	309	p.L309V	COSM1162199	1	Substitution - Missense	TREX1	ENST00000629913.3	No	PA018	1820268	Pancreas	NS	NS	Carcinoma	Ductal carcinoma	NS	22156295	-	Confirmed Somatic	Cultured	Unknown	3:48467415..48467415	c.730C>G
48467421		del
48467422	48508821	del
48467425	48508824	C>T
48467435-48467436	48508834-48508835	del
48467437	48508836	del
48467437	48508836	G>A
48467439	48508838	C>T
48467442	48508841	A>G
48467443	48508842	G>A
48467448		G>A
48467449		G>C	c.794G>C	265	p.G265A	COSM345536	1	Substitution - Missense	TREX1_ENST00000625293	ENST00000625293.2	No	LUAD-S01315	1765261	Lung	NS	NS	Carcinoma	Adenocarcinoma	NS	22980975	-	Variant of unknown origin	Tumour Sample	Unknown	3:48467449..48467449	c.959G>C	320	p.G320A	COSM345536	1	Substitution - Missense	TREX1	ENST00000629913.3	No	LUAD-S01315	1765261	Lung	NS	NS	Carcinoma	Adenocarcinoma	NS	22980975	-	Variant of unknown origin	Tumour Sample	Unknown	3:48467449..48467449	c.764G>C
48467449		G>T	c.794G>T	265	p.G265V	COSM730661	1	Substitution - Missense	TREX1_ENST00000625293	ENST00000625293.2	No	TCGA-39-5039-01	1781598	Lung	NS	NS	Carcinoma	Squamous cell carcinoma	NS	-	418	Confirmed Somatic	Tumour Sample	Unknown	3:48467449..48467449	c.959G>T	320	p.G320V	COSM730661	1	Substitution - Missense	TREX1	ENST00000629913.3	No	TCGA-39-5039-01	1781598	Lung	NS	NS	Carcinoma	Squamous cell carcinoma	NS	-	418	Confirmed Somatic	Tumour Sample	Unknown	3:48467449..48467449	c.764G>T
48467449-48467450	48508848-48508849	dup
48467451	48508850	G>T
48467452	48508851	A>G	c.797A>G	266	p.E266G	COSM7394905	1	Substitution - Missense	TREX1_ENST00000625293	ENST00000625293.2	No	H125	2776318	Lung	NS	NS	Carcinoma	Mixed adenosquamous carcinoma	NS	29681454	-	Variant of unknown origin	Unknown	Unknown	3:48467452..48467452	c.962A>G	321	p.E321G	COSM7394905	1	Substitution - Missense	TREX1	ENST00000629913.3	No	H125	2776318	Lung	NS	NS	Carcinoma	Mixed adenosquamous carcinoma	NS	29681454	-	Variant of unknown origin	Unknown	Unknown	3:48467452..48467452	c.767A>G
48467453		G>C
48467453-48467454	48508852-48508853	dup
48467454		A>G
48467457	48508856	del
48467458	48508857	del
48467458	48508857	G>A
48467458	48508857	G>C
48467460	48508859	G>A
48467461	48508860	G>A
48467462		T>C
48467467-48467468	48508866-48508867	dup
48467468	48508867	del
48467468		G>A
48467470	48508869	A>C
48467471	48508870	T>C
48467472	48508871	C>G
48467472	48508871	C>T
48467476		C>T
48467482-48467483	48508881-48508882	dup
48467483		G>A
48467484	48508883	A>T
48467488	48508887	A>T
48467491		C>A	c.836C>A	279	p.P279H	COSM3673987	1	Substitution - Missense	TREX1_ENST00000625293	ENST00000625293.2	No	TCGA-CH-5739-01	1797153	Prostate	NS	NS	Carcinoma	Adenocarcinoma	NS	-	435	Confirmed Somatic	Tumour Sample	Unknown	3:48467491..48467491	c.1001C>A	334	p.P334H	COSM3673987	1	Substitution - Missense	TREX1	ENST00000629913.3	No	TCGA-CH-5739-01	1797153	Prostate	NS	NS	Carcinoma	Adenocarcinoma	NS	-	435	Confirmed Somatic	Tumour Sample	Unknown	3:48467491..48467491	c.806C>A
48467492		del
48467493		G>A	c.838G>A	280	p.G280R	COSM9908184	1	Substitution - Missense	TREX1_ENST00000625293	ENST00000625293.2	No	PD42111a	2894820	Skin	Trunk	NS	Malignant melanoma	Superficial spreading	NS	33024263	-	Variant of unknown origin	Tumour Sample	Unknown	3:48467493..48467493	c.1003G>A	335	p.G335R	COSM9908184	1	Substitution - Missense	TREX1	ENST00000629913.3	No	PD42111a	2894820	Skin	Trunk	NS	Malignant melanoma	Superficial spreading	NS	33024263	-	Variant of unknown origin	Tumour Sample	Unknown	3:48467493..48467493	c.808G>A
48467494	48508893	G>T	c.839G>T	280	p.G280V	COSM7110900	1	Substitution - Missense	TREX1_ENST00000625293	ENST00000625293.2	No	TCGA-E7-A7DV-01	2193219	Urinary tract	Bladder	NS	Carcinoma	NS	NS	-	413	Confirmed Somatic	Unknown	Unknown	3:48467494..48467494	c.1004G>T	335	p.G335V	COSM7110900	1	Substitution - Missense	TREX1	ENST00000629913.3	No	TCGA-E7-A7DV-01	2193219	Urinary tract	Bladder	NS	Carcinoma	NS	NS	-	413	Confirmed Somatic	Unknown	Unknown	3:48467494..48467494	c.809G>T
48467498		C>T
48467501		A>G
48467503		C>G	c.848C>G	283	p.S283C	COSM6353871	1	Substitution - Missense	TREX1_ENST00000625293	ENST00000625293.2	No	KPOPBR-072-T	2633627	Breast	NS	NS	Carcinoma	NS	NS	-	669	Confirmed Somatic	Tumour Sample	Unknown	3:48467503..48467503	c.1013C>G	338	p.S338C	COSM6353871	1	Substitution - Missense	TREX1	ENST00000629913.3	No	KPOPBR-072-T	2633627	Breast	NS	NS	Carcinoma	NS	NS	-	669	Confirmed Somatic	Tumour Sample	Unknown	3:48467503..48467503	c.818C>G
48467505	48508904	dup
48467509	48508908	A>T
48467509-48467510	48508908-48508909	dup
48467511	48508910	G>A	c.856G>A	286	p.G286R	COSM8230343	1	Substitution - Missense	TREX1_ENST00000625293	ENST00000625293.2	No	TCGA-EM-A2CS-06	2185868	Thyroid	NS	NS	Carcinoma	NS	NS	-	542	Confirmed Somatic	Unknown	Unknown	3:48467511..48467511	c.1021G>A	341	p.G341R	COSM8230343	1	Substitution - Missense	TREX1	ENST00000629913.3	No	TCGA-EM-A2CS-06	2185868	Thyroid	NS	NS	Carcinoma	NS	NS	-	542	Confirmed Somatic	Unknown	Unknown	3:48467511..48467511	c.826G>A
48467511-48467520	48508910-48508919	dup
48467512	48508911	G>A
48467513	48508912	del
48467513	48508912	dup
48467521	48508920	C>T
48467523-48467540	48508922-48508939	del
48467524	48508923	C>T
48467525		A>G
48467526		C>A	c.871C>A	291	p.L291M	COSM7394904	1	Substitution - Missense	TREX1_ENST00000625293	ENST00000625293.2	No	HCC1195	2776293	Lung	NS	NS	Carcinoma	Adenocarcinoma	NS	29681454	-	Variant of unknown origin	Unknown	Unknown	3:48467526..48467526	c.1036C>A	346	p.L346M	COSM7394904	1	Substitution - Missense	TREX1	ENST00000629913.3	No	HCC1195	2776293	Lung	NS	NS	Carcinoma	Adenocarcinoma	NS	29681454	-	Variant of unknown origin	Unknown	Unknown	3:48467526..48467526	c.841C>A
48467530		G>A	c.875G>A	292	p.G292D	COSM5864710	1	Substitution - Missense	TREX1_ENST00000625293	ENST00000625293.2	No	Pat_28_B	2513795	NS	NS	NS	Malignant melanoma	NS	NS	24265153	-	Confirmed Somatic	Tumour Sample	Unknown	3:48467530..48467530	c.1040G>A	347	p.G347D	COSM5864710	1	Substitution - Missense	TREX1	ENST00000629913.3	No	Pat_28_B	2513795	NS	NS	NS	Malignant melanoma	NS	NS	24265153	-	Confirmed Somatic	Tumour Sample	Unknown	3:48467530..48467530	c.845G>A
48467532	48508931	C>G
48467534		G>C
48467540		C>T
48467543	48508942	C>T
48467544		C>T
48467547	48508946	A>T
48467549		C>T
48467550	48508949	T>G
48467552-48467553	48508951-48508952	dup
48467554	48508953	C>T
48467557	48508956	T>C	c.902T>C	301	p.V301A	COSM8760509	1	Substitution - Missense	TREX1_ENST00000625293	ENST00000625293.2	No	TCGA-94-8490-01	2340065	Lung	NS	NS	Carcinoma	Squamous cell carcinoma	NS	-	418	Confirmed Somatic	Tumour Sample	Unknown	3:48467557..48467557	c.1067T>C	356	p.V356A	COSM8760509	1	Substitution - Missense	TREX1	ENST00000629913.3	No	TCGA-94-8490-01	2340065	Lung	NS	NS	Carcinoma	Squamous cell carcinoma	NS	-	418	Confirmed Somatic	Tumour Sample	Unknown	3:48467557..48467557	c.872T>C
48467559		G>T
48467561-48467562	48508960-48508961	del
48467562	48508961	A>C
48467562-48467565	48508961-48508964	dup
48467563	48508962	C>T
48467566-48467569	48508965-48508968	del
48467567	48508966	G>A
48467569	48508968	A>G
48467570		T>C
48467571	48508970	G>A
48467571	48508970	G>T	c.916G>T	306	p.G306*	COSM7875599	1	Substitution - Nonsense	TREX1_ENST00000625293	ENST00000625293.2	No	TCGA-EE-A2MD-06	2121676	Skin	NS	NS	Malignant melanoma	NS	NS	-	540	Confirmed Somatic	Unknown	Unknown	3:48467571..48467571	c.1081G>T	361	p.G361*	COSM7875599	1	Substitution - Nonsense	TREX1	ENST00000629913.3	No	TCGA-EE-A2MD-06	2121676	Skin	NS	NS	Malignant melanoma	NS	NS	-	540	Confirmed Somatic	Unknown	Unknown	3:48467571..48467571	c.886G>T
48467572	48508971	G>A	c.917G>A	306	p.G306E	COSM8270643	1	Substitution - Missense	TREX1_ENST00000625293	ENST00000625293.2	No	TCGA-CX-7085-01	2193569	Upper aerodigestive tract	Head neck	NS	Carcinoma	Squamous cell carcinoma	NS	-	627	Confirmed Somatic	Unknown	Unknown	3:48467572..48467572	c.1082G>A	361	p.G361E	COSM8270643	1	Substitution - Missense	TREX1	ENST00000629913.3	No	TCGA-CX-7085-01	2193569	Upper aerodigestive tract	Head neck	NS	Carcinoma	Squamous cell carcinoma	NS	-	627	Confirmed Somatic	Unknown	Unknown	3:48467572..48467572	c.887G>A
48467572	48508971	G>C
48467578	48508977	C>G
48467579	48508978	C>A
48467580		C>T
48467589	48508988	C>G
48467590	48508989	C>G
48467590	48508989	C>T	c.935C>T	312	p.P312L	COSM3594916	1	Substitution - Missense	TREX1_ENST00000625293	ENST00000625293.2	No	TCGA-FW-A3TU-06	2121784	Skin	NS	NS	Malignant melanoma	NS	NS	-	540	Confirmed Somatic	Unknown	Unknown	3:48467590..48467590	c.1100C>T	367	p.P367L	COSM3594916	1	Substitution - Missense	TREX1	ENST00000629913.3	No	TCGA-FW-A3TU-06	2121784	Skin	NS	NS	Malignant melanoma	NS	NS	-	540	Confirmed Somatic	Unknown	Unknown	3:48467590..48467590	c.905C>T
48467601	48509000	G>T
48467602		C>T
48467610		dup
48467619		A>G
48467620		C>T
48467621		G>A
48467629		dup
48467634	48509033	C>T
48467634	48509033	del
48467637		T>C
48467638		G>A
48467641		C>T
48467643		A>G
48467644		T>C
[truncated: 142 more columns]
