# Supplementary material for: Prevalence and impact of molecular variation in the three-prime repair exonuclease 1 TREX1 and its implications for oncology
Source: Hum Genomics. 2025 Jun 28;19:73. doi: 10.1186/s40246-025-00785-y (PMC12206365; doi:10.1186/s40246-025-00785-y)
Supplement: Supplementary file 10 — Additional file 10. Table S7. Human TREX1b protein sequence variants reported in public databases, and genomic variants upstream and downstream of the TREX1b isoform. [file 40246_2025_785_MOESM10_ESM.xlsx]

## Sheet: Table_S7
Table S7. Human TREX1b protein sequence variants reported in public databases, and genomic variants upstream and downstream of the TREX1b isoform
Shown are TREX1b protein sequence variants, and genome sequence variants upstream and downstream of the genome region encoding the TREX1b transcript isoform.
In all cases where genomic sequence data were available, information about protein sequence variants was integrated from DNA sequence changes if they resulted in the same protein sequence change.
For those columns and amino acid changes where the combined genomic variants had different data, information for individuals genomic variants is separated by a semicolon (;).
Detailed information about each individual genomic variant is provided in Table S6.
DNA sequence variants flanking the TREX1 isoform include the variants in 5' and 3' untranslated regions upstream and downstream of the TREX1 gene
and genome variants within the region encoding the N-terminal part of the non-canonical TREX1a transcript.
The records were sorted by the genomic location according to the GRCh38 assembly.
UTR, untranslated region; *, premature stop codon; fs, frameshift
Allele frequency in gnomAD was labeled as Elevated if database-wide frequency of a given variant allele was > 0.0011, and as Low if it were <= 0.0011.
Location_GRCh38	Location_hg19	Genomic_change	amino_acid_change_TREX1b	Protein_Consequence_TREX1b	Cosmic-CDS_mutation	Cosmic-AA Mutation_TREX1b	Cosmic-Legacy_mutation_ID	Cosmic-Type	Cosmic-Gene_name	Cosmic-Transcript	Cosmic-Census_tier	Cosmic-Sample_name	Cosmic-Sample_ID	Cosmic-Primary_tissue	Cosmic-Tissue_subtype1	Cosmic-Tissue_subtype2	Cosmic-Histology	Cosmic-Histology_subtype1	Cosmic-Histology_subtype2	Cosmic-Pubmed_ID	Cosmic-CGP_study	Cosmic-Somatic_status	Cosmic-Sample_type	Cosmic-Zygosity	Cosmic-Genomic_coordinates	Cosmic-Count	Cosmic-CDS_mutation_TREX1a	Cosmic-AA Mutation_TREX1a	Cosmic-CDS_mutation_TREX1c	Cosmic-AA Mutation_TREX1c	TCGA-HGVSc	TCGA-HGVSp	TCGA-HGVSp_Short	TCGA-Count	TCGA_Study	TCGA-Primary_Tissue	TCGA-Consequence	TCGA-dbSNP_RS	TCGA-Protein_position (TREX1a)	TCGA-Codons	TCGA-CDS_position	TCGA-Existing_variation	TCGA-PolyPhen	TCGA-SIFT	TCGA-cDNA_position	TCGA-Start_Position	TCGA-End_Position	ClinVar-Name	ClinVar-CDS Mutation
48447048	48488452	C>T	5_prime_UTR variant
48450071	48491477	G>A	5_prime_UTR variant
48459357	48500756	A>G	5_prime_UTR variant
48460530	48501929	C>T	5_prime_UTR variant
48460678	48502077	C>T	5_prime_UTR variant
48463805	48505204	C>T	5_prime_UTR variant
48464650	48506049	G>C	5_prime_UTR variant
48464838	48506237	G>A	5_prime_UTR variant
48464880	48506279	G>A	5_prime_UTR variant
48464908	48506307	C>G	5_prime_UTR variant
48464918	48506317	C>T	5_prime_UTR variant
48464990	48506389	A>T	5_prime_UTR variant
48465072	48506471	C>T	5_prime_UTR variant
48466264	48507663	A>T	5_prime_UTR variant																												ENST00000422277.2:c.-227A>T		p.*76*	1	KIRP	kidney_papillary_cell	5_prime_UTR_variant	novel			.	.	.	.	435	48507663	48507663
48466268	48507667	T>C	5_prime_UTR variant
48466357	48507756	G>T	5_prime_UTR variant																												ENST00000422277.2:c.-134G>T		p.*45*	1	STAD	stomach	5_prime_UTR_variant	novel			.	.	.	.	528	48507756	48507756
48466421	48507820	C>T	5_prime_UTR variant																												ENST00000422277.2:c.-70C>T		p.*24*	1	SKCM	melanoma	5_prime_UTR_variant	novel			.	.	.	.	592	48507820	48507820
48466434	48507833	G>C	5_prime_UTR variant																												ENST00000422277.2:c.-57G>C		p.*19*	1	BLCA	bladder	5_prime_UTR_variant	rs538072940			.	rs538072940	.	.	605	48507833	48507833
48466454	48507853	G>A	5_prime_UTR variant																												ENST00000422277.2:c.-37G>A		p.*13*	1	SKCM	melanoma	5_prime_UTR_variant	rs769025334			.	rs769025334	.	.	625	48507853	48507853
48466455	48507854	G>A	5_prime_UTR variant																												ENST00000422277.2:c.-36G>A		p.*12*	1	LUAD	lung_adenocarcinoma	5_prime_UTR_variant	novel			.	.	.	.	626	48507854	48507854
48466473	48507872	C>T	5_prime_UTR variant
48466488	48507887	del	5_prime_UTR variant																												ENST00000422277.2:c.1del		p.*1*	1	COADREAD	colorectal	5_prime_UTR_variant	novel			.	.	.	.	659	48507887	48507887
48466495	48507894	G>A
48466510	48507909	G>A																								1	c.20G>A	p.R7K			ENST00000422277.2:c.20G>A	p.Arg7Lys	p.R7K	1	BLCA	bladder	missense_variant	rs760207170	7	aGa/aAa	20	rs760207170	unknown(0)	tolerated_low_confidence(1)	681	48507909	48507909
48466511	48507910	A>G
48466512		C>T																								2	c.22C>T	p.Q8*
48466519	48507918	G>C																								2	c.29G>C	p.R10T			ENST00000422277.2:c.29G>C	p.Arg10Thr	p.R10T	2	BLCA, HNSC	bladder, head_and_neck	missense_variant	novel	10	aGg/aCg	29	.	unknown(0)	tolerated_low_confidence(0.11)	690	48507918	48507918
48466535	48507934	G>T																								2	c.45G>T	p.R15S
48466557	48507956	C>G																								1	c.67C>G	p.P23A			ENST00000422277.2:c.67C>G	p.Pro23Ala	p.P23A	1	COADREAD	colorectal	missense_variant	rs371026419	23	Ccc/Gcc	67	rs371026419,COSM1423752	unknown(0)	tolerated_low_confidence(0.64)	728	48507956	48507956
48466560	48507959	C>G
48466560		C>T																								1	c.70C>T	p.P24S
48466561		C>A																								1	c.71C>A	p.P24H
48466562	48507961	T>A
48466565	48507964	C>A
48466569	48507968	C>A																													ENST00000422277.2:c.79C>A	p.Leu27Ile	p.L27I	1	UCEC	endometrial	missense_variant	rs749371002	27	Ctc/Atc	79	rs749371002	unknown(0)	tolerated_low_confidence(0.4)	740	48507968	48507968
48466578		del																								1	c.88del	p.L30Ffs*4
48466581	48507980	C>T
48466582		G>A
48466582		G>C
48466582		G>T
48466583		dup
48466593	48507992	del																													ENST00000422277.2:c.103_104del	p.Leu35GlyfsTer121	p.L35Gfs*121	1	HNSC	head_and_neck	frameshift_variant	novel	35	CTg/g	103-104	.	.	.	764-765	48507992	48507993
48466593		C>G
48466593		C>T
48466593		del
48466596		G>T
48466600		C>T
48466602		C>T
48466605		A>G
48466608		C>T
48466612		C>T
48466616		A>C
48466617		T>C
48466623		T>C
48466624		C>T
48466625		T>C
48466629	48508028	G>A																								1	c.139G>A	p.G47S
48466642		dup
48466643		T>G
48466645		C>G
48466645-48466657	48508044-48508056	del																																														NM_033629.6(TREX1)	c.-11_2del
48466646		G>A
48466648		A>C																								1	c.158A>C	p53S
48466648		A>G
48466651		dup
48466653		A>G																								1	c.163A>G	p.T55A
48466654	48508053	C>T
48466656	48508055	A>G	p.M1V	Nonsynonymous																																												NM_033629.6(TREX1)	c.1A>G
48466657	48508056	T>C	p.M1T	Nonsynonymous																																												NM_033629.6(TREX1)	c.2T>C
48466658	48508057	del	p.G2fs	Frameshift																																												NM_033629.6(TREX1)	c.5del
48466659		G>A	p.G2S	Nonsynonymous
48466660	48508059	G>T	p.G2V	Nonsynonymous																																												NM_033629.6(TREX1)	c.5G>T
48466663	48508062	C>T	p.S3L	Nonsynonymous																																												NM_033629.6(TREX1)	c.8C>T
48466664		G>A	splice_region_variant	splice_region_variant
48466665	48508064	C>A	p.Q4K	Nonsynonymous																																												NM_033629.6(TREX1)	c.10C>A
48466665	48508064	C>T	p.Q4*	Stop_gained	c.10C>T	p.Q4*	COSM8428039	Substitution - Nonsense	TREX1_ENST00000625293	ENST00000625293.2	No	TCGA-HZ-7289-01	2196538	Pancreas	NS	NS	Carcinoma	Ductal carcinoma	NS	-	629	Confirmed Somatic	Unknown	Unknown	3:48466665..48466665	1	c.175C>T	p.Q59*			ENST00000422277.2:c.175C>T	p.Gln59Ter	p.Q59*	1	PAAD	pancreas	stop_gained	novel	59	Cag/Tag	175	.	.	.	836	48508064	48508064
48466669	48508068	C>A	p.A5D	Nonsynonymous																																												NM_033629.6(TREX1)	c.14C>A
48466672-48466673	48508071-48508072	dup	p.P7fs	Frameshift																																												NM_033629.6(TREX1)	c.18dup
48466673-48466674	48508072-48508073	dup	p.P10fs	Frameshift																																												NM_033629.6(TREX1)	c.23dup
48466674	48508073	C>T	p.P7S	Nonsynonymous																																												NM_033629.6(TREX1)	c.19C>T
48466675	48508074	C>G	p.P7R	Nonsynonymous																																												NM_033629.6(TREX1)	c.20C>G
48466677	48508076	C>G	p.P8A	Nonsynonymous																																												NM_033629.6(TREX1)	c.22C>G
48466678	48508077	C>T	p.P8L	Nonsynonymous																																												NM_033629.6(TREX1)	c.23C>T
48466679;48466679		G>A;G>C	p.P8P	Synonymous
48466681	48508080	G>A	p.G9E	Nonsynonymous																																												NM_033629.6(TREX1)	c.26G>A
48466682	48508081	G>A	p.G9G	Synonymous
48466683		C>A	p.P10T	Nonsynonymous	c.28C>A	p.P10T	COSM9105006	Substitution - Missense	TREX1_ENST00000625293	ENST00000625293.2	No	CHCOSK001	2779625	Biliary tract	Bile duct	NS	Carcinoma	NS	NS	27267998	-	Confirmed Somatic	Tumour Sample	Unknown	3:48466683..48466683	1	c.193C>A	p.P65T
48466684	48508083	C>A	p.P10H	Nonsynonymous																																												NM_033629.6(TREX1)	c.29C>A
48466685		C>T	p.P10P	Synonymous
48466687	48508086	T>C	p.M11T	Nonsynonymous																																												NM_033629.6(TREX1)	c.32T>C
48466687	48508086	T>G	p.M11R	Nonsynonymous																																												NM_033629.6(TREX1)	c.32T>G
48466690	48508089	A>G	p.Q12R	Nonsynonymous																																												NM_033629.6(TREX1)	c.35A>G
48466692		A>T	p.T13S	Nonsynonymous
48466693	48508092	C>A	p.T13N	Nonsynonymous
48466695	48508094	C>T	p.L14F	Nonsynonymous																																												NM_033629.6(TREX1)	c.40C>T
48466698	48508097-48508099	dup	p.I15dup	Insertion
48466700	48508099	C>G	p.I15M	Nonsynonymous																																												NM_033629.6(TREX1)	c.45C>G
48466705		T>C	p.F17S	Nonsynonymous
48466706		C>G	p.F17L	Nonsynonymous	c.51C>G	p.F17L	COSM9557860	Substitution - Missense	TREX1_ENST00000625293	ENST00000625293.2	No	BRCA-05246_CCPM_0300316-Tumor-SM-AXFHZ;BRCA-05246_CCPM_0300316-Tumor-SM-AFDG4	2857595,2857596	Breast	NS	NS	Carcinoma	ER-PR-positive carcinoma	NS	30531871	-	Confirmed Somatic	Tumour Sample	Unknown	3:48466706..48466706	2	c.216C>G	p.F72L	c.21C>G	p.F7L
48466707	48508106	G>A	p.D18N	Nonsynonymous																																												NM_033629.6(TREX1)	c.52G>A
48466710	48508109	A>C	p.M19L	Nonsynonymous																																												NM_033629.6(TREX1)	c.55A>C
48466710	48508109	A>G	p.M19V	Nonsynonymous																																												NM_033629.6(TREX1)	c.55A>G
48466711;48466713	;48508112	dup;dup	p.E20Gfs*82	Frameshift+Stop_gained
48466711-48466712	48508110-48508111	dup	p.E20fs	Frameshift																																												NM_033629.6(TREX1)	c.58dup
48466716	48508115	G>A	p.A21T	Nonsynonymous																																												NM_033629.6(TREX1)	c.61G>A
48466722	48508121	G>A	p.G23S	Nonsynonymous																											ENST00000422277.2:c.232G>A	p.Gly78Ser	p.G78S	1	TGCT	testicular	missense_variant	novel	78	Ggc/Agc	232	.	probably_damaging(1)	deleterious(0.02)	893	48508121	48508121
48466723	48508122	G>A	p.G23D	Nonsynonymous	c.68G>A	p.G23D	COSM8227842	Substitution - Missense	TREX1_ENST00000625293	ENST00000625293.2	No	TCGA-SW-A7EA-01	2339963	Stomach	NS	NS	Carcinoma	Adenocarcinoma	NS	-	541	Confirmed Somatic	Tumour Sample	Unknown	3:48466723..48466723	1	c.233G>A	p.G78D	c.38G>A	p.G13D	ENST00000422277.2:c.233G>A	p.Gly78Asp	p.G78D	1	STAD	stomach	missense_variant	novel	78	gGc/gAc	233	.	probably_damaging(1)	deleterious(0.03)	894	48508122	48508122
48466723		G>T	p.G23V	Nonsynonymous	c.68G>T	p.G23V	COSM6807711	Substitution - Missense	TREX1_ENST00000625293	ENST00000625293.2	No	T593	2658231	Large intestine	NS	NS	Carcinoma	Adenocarcinoma	NS	27149842	-	Confirmed Somatic	Unknown	Unknown	3:48466723..48466723	1	c.233G>T	p.G78V	c.38G>T	p.G13V
48466724		C>T	p.G23G	Synonymous
48466728	48508127	C>A	p.P25T	Nonsynonymous																																												NM_033629.6(TREX1)	c.73C>A
48466729	48508128	C>T	p.P25L	Nonsynonymous	c.74C>T	p.P25L	COSM1692736	Substitution - Missense	TREX1_ENST00000625293	ENST00000625293.2	No	YUPAT	2013666	Skin	NS	NS	Malignant melanoma	NS	NS	22842228	-	Confirmed Somatic	Unknown	Heterozygous	3:48466729..48466729	1	c.239C>T	p.P80L	c.44C>T	p.P15L																		NM_033629.6(TREX1)	c.74C>T
48466732-48466733		delinsCG	p.F26S	Nonsynonymous	c.77_78delinsCG	p.F26S	COSM9812688	Substitution - Missense	TREX1_ENST00000625293	ENST00000625293.2	No	DD107_Org	2749229	Stomach	NS	NS	Carcinoma	Adenocarcinoma	NS	29703791	-	Confirmed Somatic	Cultured	Heterozygous	3:48466732..48466733	1	c.242_243delinsCG	p.F81S	c.47_48delinsCG	p.F16S
48466735	48508134	C>T	p.S27F	Nonsynonymous																																												NM_033629.6(TREX1)	c.80C>T
48466738	48508137	A>G	p.Q28R	Nonsynonymous	c.83A>G	p.Q28R	COSM9812689	Substitution - Missense	TREX1_ENST00000625293	ENST00000625293.2	No	DD107_Org	2749229	Stomach	NS	NS	Carcinoma	Adenocarcinoma	NS	29703791	-	Confirmed Somatic	Cultured	Heterozygous	3:48466738..48466738	1	c.248A>G	p.Q83R	c.53A>G	p.Q18R																		NM_033629.6(TREX1)	c.83A>G
48466740	48508139	C>T	p.P29S	Nonsynonymous	c.85C>T	p.P29S	COSM7168954	Substitution - Missense	TREX1_ENST00000625293	ENST00000625293.2	No	TCGA-YC-A89H-01	2339203	Urinary tract	Bladder	NS	Carcinoma	NS	NS	-	413	Confirmed Somatic	Tumour Sample	Unknown	3:48466740..48466740	1	c.250C>T	p.P84S	c.55C>T	p.P19S	ENST00000422277.2:c.250C>T	p.Pro84Ser	p.P84S	1	BLCA	bladder	missense_variant	rs1407557314	84	Ccc/Tcc	250	.	probably_damaging(1)	deleterious(0.02)	911	48508139	48508139	NM_033629.6(TREX1)	c.85C>T
48466743	48508142	A>G	p.K30E	Nonsynonymous	c.88A>G	p.K30E	COSM9812690	Substitution - Missense	TREX1_ENST00000625293	ENST00000625293.2	No	DD107_Org	2749229	Stomach	NS	NS	Carcinoma	Adenocarcinoma	NS	29703791	-	Confirmed Somatic	Cultured	Heterozygous	3:48466743..48466743	1	c.253A>G	p.K85E	c.58A>G	p.K20E																		NM_033629.6(TREX1)	c.88A>G
48466746	48508145	G>A	p.V31I	Nonsynonymous																																												NM_033629.6(TREX1)	c.91G>A
48466750	48508149	C>G	p.T32R	Nonsynonymous
48466750	48508149	C>T	p.T32M	Nonsynonymous																																												NM_033629.6(TREX1)	c.95C>T
48466751		G>A	p.T32T	Synonymous
48466753	48508152	A>T	p.E33V	Nonsynonymous																																												NM_033629.6(TREX1)	c.98A>T
48466755;48466757		C>T;G>A	p.L34L	Synonymous
48466767	48508166	G>T	p.A38S	Nonsynonymous																																												NM_033629.6(TREX1)	c.112G>T
48466768	48508167	C>T	p.A38V	Nonsynonymous																																												NM_033629.6(TREX1)	c.113C>T
48466770		G>C	p.V39L	Nonsynonymous
48466772		C>G	splice_region_variant	splice_region_variant
48466775		C>T	splice_region_variant	splice_region_variant
48466776		dup	splice_acceptor_variant	splice_acceptor_variant
48466776-48466777	48508175-48508176	dup	p.C42*	Stop_gained																																												NM_033629.6(TREX1)	c.123_125dup
48466779		T>C	p.C42R	Nonsynonymous	c.124T>C	p.C42R	COSM9812691	Substitution - Missense	TREX1_ENST00000625293	ENST00000625293.2	No	DD107_Org;DD191_Org	27492292749233	Stomach	NS,Gastroesophageal junction	NS	Carcinoma	Adenocarcinoma	NS	29703791	-	Confirmed Somatic	Cultured	Heterozygous	3:48466779..48466779	2	c.289T>C	p.C97R	c.94T>C	p.C32R
48466780	48508179	G>A	p.C42Y	Nonsynonymous																																												NM_033629.6(TREX1)	c.125G>A
48466781	48508180	T>G	p.C42W	Nonsynonymous																																												NM_033629.6(TREX1)	c.126T>G
48466782	48508181	G>A	p.A43T	Nonsynonymous																																												NM_033629.6(TREX1)	c.127G>A
48466782	48508181	G>T	p.A43S	Nonsynonymous																																												NM_033629.6(TREX1)	c.127G>T
48466786	48508185	T>C	p.L44P	Nonsynonymous	c.131T>C	p.L44P	COSM4920953	Substitution - Missense	TREX1_ENST00000625293	ENST00000625293.2	No	TCGA-DD-A4NJ-01	2194542	Liver	NS	NS	Carcinoma	Hepatocellular carcinoma	NS	-	628	Confirmed Somatic	Unknown	Unknown	3:48466786..48466786	1	c.296T>C	p.L99P	c.101T>C	p.L34P	ENST00000422277.2:c.296T>C	p.Leu99Pro	p.L99P	2	LIHC, LIHC	liver, liver	missense_variant	novel	99	cTg/cCg	296	.	probably_damaging(1)	deleterious(0)	957	48508185	48508185
48466787-48466789		delinsAAG	p.E45R	Nonsynonymous	c.132_134delinsAAG	p.E45R	COSM9430534	Substitution - Missense	TREX1_ENST00000625293	ENST00000625293.2	No	EXTERN_MELA_20140924_013	2839373	Skin	Face	NS	Malignant melanoma	NS	NS	28467829	-	Confirmed Somatic	Tumour Sample	Unknown	3:48466787..48466789	1	c.297_299delinsAAG	p.E100R	c.102_104delinsAAG	p.E35R
48466791-48466792	48508190-48508191	dup	p.S46fs	Frameshift																																												NM_033629.6(TREX1)	c.137dup
48466792;48466799-48466800	48508191;	dup;dup	p.T49Hfs*53	Frameshift+Stop_gained	;c.144dup	;p.T49Hfs*53	;COSM4612154	;Insertion - Frameshift	;TREX1_ENST00000625293	;ENST00000625293.2	;No	;T111; TCGA-CG-4442-01; HCA7; CC-UT-167T; T1849	;2658341, 2198151, 2301976, 2856950, 2658271	;Large intestine, Stomach, Kidney	;NS, Colon	;NS, Right	;Carcinoma	;Adenocarcinoma, Clear cell renal cell carcinoma	;NS	;27149842, -, 24755471, 32271170	;-, 541	;Confirmed Somatic, Previously Reported	;Unknown, Cultured, Tumour Sample	;Unknown, Heterozygous	;3:48466799..48466800	;5	;c.309dup	;p.T104Hfs*53	;c.114dup	;p.T39Hfs*53	ENST00000422277.2:c.309dup;	p.Thr104HisfsTer53;	p.T104Hfs*53;	1;	STAD;	stomach;	frameshift_variant;	rs748914604;	101;	agc/agCc;	302-303;	rs748914604;	.;	.;	963-964;	48508191;	48508192;
48466792		G>A	p.S46N	Nonsynonymous	c.137G>A	p.S46N	COSM9823492	Substitution - Missense	TREX1_ENST00000625293	ENST00000625293.2	No	DD191_Org	2749233	Stomach	Gastroesophageal junction	NS	Carcinoma	Adenocarcinoma	NS	29703791	-	Confirmed Somatic	Cultured	Heterozygous	3:48466792..48466792	1	c.302G>A	p.S101N	c.107G>A	p.S36N
48466792-48466793	48508191-48508192	dup	p.T49fs	Frameshift																																												NM_033629.6(TREX1)	c.144dup
48466793	48508192	del	p.T49fs	Frameshift																											ENST00000422277.2:c.309del	p.Thr104ProfsTer16	p.T104Pfs*16	1	STAD	stomach	frameshift_variant	rs748914604	101	agC/ag	303	.	.	.	964	48508192	48508192	NM_033629.6(TREX1)	c.144del
48466793		C>T	p.S46S	Synonymous
48466793-48466794	48508192-48508193	del	p.P48fs	Frameshift																																												NM_033629.6(TREX1)	c.143_144del
48466793-48466795	48508192-48508194	del	p.P48del	Deletion																																												NM_033629.6(TREX1)	c.142_144del
48466794	48508193	C>A	p.P47T	Nonsynonymous	c.139C>A	p.P47T	COSM9823493	Substitution - Missense	TREX1_ENST00000625293	ENST00000625293.2	No	DD191_Org	2749233	Stomach	Gastroesophageal junction	NS	Carcinoma	Adenocarcinoma	NS	29703791	-	Confirmed Somatic	Cultured	Heterozygous	3:48466794..48466794	1	c.304C>A	p.P102T	c.109C>A	p.P37T																		NM_033629.6(TREX1)	c.139C>A
48466795		C>A	p.P47H	Nonsynonymous
48466796	48508195	C>T	p.P47P	Synonymous																											ENST00000422277.2:c.306C>T	p.Pro102=	p.P102=	1	UCEC	endometrial	synonymous_variant	novel	102	ccC/ccT	306	.	.	.	967	48508195	48508195
48466796-48466797;48466797	;48508196	delinsTT;C>T	p.P48S	Nonsynonymous	c.141_142delinsTT;c.142C>T	p.P48S	COSM9823494;COSM7482364	Substitution - Missense	TREX1_ENST00000625293	ENST00000625293.2	No	DD191_Org;TCGA-14-0866-01	2749233;2178121	Stomach;Central nervous system	Gastroesophageal junction;Brain	NS	Carcinoma;Glioma	Adenocarcinoma;Astrocytoma Grade IV	NS;Glioblastoma multiforme	29703791;-	-;329	Confirmed Somatic	Cultured;Unknown	Heterozygous;Unknown	3:48466796..48466797;3:48466797..48466797	1	c.306_307delinsTT;c.307C>T	p.P103S	c.111_112delinsTT;c.112C>T	p.P38S	;ENST00000422277.2:c.307C>T	;p.Pro103Ser	;p.P103S	;1	;GBM	;glioblastoma	;missense_variant	;rs754776272	;103	;Ccc/Tcc	;307	;rs754776272	;benign(0.006)	;tolerated(0.5)	;968	;48508196	;48508196
48466798	48508197	C>T	p.P48L	Nonsynonymous																																												NM_033629.6(TREX1)	c.143C>T
48466799	48508198	dup	p.T49Hfs*53	Frameshift+Stop_gained
48466799;48466799	;48508198	C>A;C>G	p.P48P	Synonymous
48466799;48466799	;48508198	del;del	p.T49Pfs*16	Frameshift+Stop_gained	c.144del;	p.T49Pfs*16;	COSM4613605;	Deletion - Frameshift;	TREX1_ENST00000625293;	ENST00000625293.2;	No;	LIM2405;T207430;T242594;T390;155;	2301994, 2658236, 2658263, 2658301, 2748127;	Large intestine,Stomach;	Colon,NS;	Right,NS;	Carcinoma;	Adenocarcinoma,NS;	NS;	24755471,27149842,-;	-,683;	Previously Reported,Confirmed Somatic;	Cultured,Unknown,Tumour Sample;	Heterozygous,Unknown;	3:48466799..48466799;	5;	c.309del;	p.T104Pfs*16;	c.114del;	p.T39Pfs*16;
48466800	48508199	A>C	p.T49P	Nonsynonymous
48466800	48508199	A>G	p.T49A	Nonsynonymous																																												NM_033629.6(TREX1)	c.145A>G
48466801;48466805-48466806	;48508204-48508205	del;del	p.Q51Gfs*50	Frameshift+Stop_gained
48466801-48466802		delinsTT	p.T49I	Nonsynonymous	c.146_147delinsTT	p.T49I	COSM9823495	Substitution - Missense	TREX1_ENST00000625293	ENST00000625293.2	No	DD191_Org	2749233	Stomach	Gastroesophageal junction	NS	Carcinoma	Adenocarcinoma	NS	29703791	-	Confirmed Somatic	Cultured	Heterozygous	3:48466801..48466802	1	c.311_312delinsTT	p.T104I	c.116_117delinsTT	p.T39I
48466802-48466803;48466806-48466819;48466807-48466808	48508201-48508202;48508205-48508218;48508206-48508207	del;del;del	p.Q51fs	Frameshift																																												NM_033629.6(TREX1)	c.150_151del;c.153_166del;c.152_153del
48466804		C>T	p.S50F	Nonsynonymous	c.149C>T	p.S50F	COSM7341810	Substitution - Missense	TREX1_ENST00000625293	ENST00000625293.2	No	20	2766258	Salivary gland	Parotid	NS	Carcinoma	Mucoepidermoid carcinoma	NS	27340278	-	Confirmed Somatic	Tumour Sample	Unknown	3:48466804..48466804	1	c.314C>T	p.S105F	c.119C>T	p.S40F
48466806		C>T	p.Q51*	Stop_gained	c.151C>T	p.Q51*	COSM3070388	Substitution - Nonsense	TREX1_ENST00000625293	ENST00000625293.2	No	2857095; H1869	2857095, 2776250	Urinary tract, Lung	Bladder, NS	NS	Carcinoma	Transitional cell carcinoma, Squamous cell carcinoma	NS	25096233, 29681454	-	Confirmed Somatic, Previously Reported	Tumour Sample, Unknown	Unknown	3:48466806..48466806	2	c.316C>T	p.Q106*	c.121C>T	p.Q41*
48466807	48508206	A>C	p.Q51P	Nonsynonymous																																												NM_033629.6(TREX1)	c.152A>C
48466807	48508206	A>G	p.Q51R	Nonsynonymous																																												NM_033629.6(TREX1)	c.152A>G
48466809		G>T	p.G52W	Nonsynonymous
48466813-48466814		delinsAT	p.P53H	Nonsynonymous	c.158_159delinsAT	p.P53H	COSM9823496	Substitution - Missense	TREX1_ENST00000625293	ENST00000625293.2	No	DD191_Org	2749233	Stomach	Gastroesophageal junction	NS	Carcinoma	Adenocarcinoma	NS	29703791	-	Confirmed Somatic	Cultured	Heterozygous	3:48466813..48466814	1	c.323_324delinsAT	p.P108H	c.128_129delinsAT	p.P43H
48466816		C>A	p.P54H	Nonsynonymous	c.161C>A	p.P54H	COSM4735870	Substitution - Missense	TREX1_ENST00000625293	ENST00000625293.2	No	T3202	2658288, 2296197	Large intestine	NS, Caecum	NS	Carcinoma	Adenocarcinoma	NS	27149842, 25344691	-	Confirmed Somatic	Unknown	Unknown	3:48466816..48466816	2	c.326C>A	p.P109H	c.131C>A	p.P44H
48466823		A>T	p.T56T	Synonymous
48466826		del	p.P58Hfs*6	Frameshift+Stop_gained
48466827	48508226	C>T	p.P58S	Nonsynonymous																																												NM_033629.6(TREX1)	c.172C>T
48466828	48508227	C>T	p.P58L	Nonsynonymous																																												NM_033629.6(TREX1)	c.173C>T
48466832		A>G	p.P59P	Synonymous
48466837	48508236	C>A	p.P61Q	Nonsynonymous																																												NM_033629.6(TREX1)	c.182C>A
48466837	48508236	C>G	p.P61R	Nonsynonymous																																												NM_033629.6(TREX1)	c.182C>G
48466837	48508236	C>T	p.P61L	Nonsynonymous																																												NM_033629.6(TREX1)	c.182C>T
48466838	48508237	G>A	p.P61P	Synonymous
48466839	48508238	C>G	p.R62G	Nonsynonymous																																												NM_033629.6(TREX1)	c.184C>G
48466839	48508238	C>T	p.R62C	Nonsynonymous																																												NM_033629.6(TREX1)	c.184C>T
48466840	48508239	G>A	p.R62H	Nonsynonymous																																												NM_033629.6(TREX1)	c.185G>A
48466840	48508239	G>T	p.R62L	Nonsynonymous																																												NM_033629.6(TREX1)	c.185G>T
48466840		G>C	p.R62P	Nonsynonymous
48466842	48508241	G>A	p.V63M	Nonsynonymous																																												NM_033629.6(TREX1)	c.187G>A
48466846	48508245	T>C	p.V64A	Nonsynonymous																																												NM_033629.6(TREX1)	c.191T>C
48466848-48466850	48508247-48508249	dup	p.D65dup	Insertion
48466851		A>T	p.K66*	Stop_gained	c.196A>T	p.K66*	COSM140907	Substitution - Nonsense	TREX1_ENST00000625293	ENST00000625293.2	No	cSCCP8	1604874	Skin	Ear	NS	Carcinoma	Squamous cell carcinoma	NS	21984974	-	Confirmed Somatic	Tumour Sample	Unknown	3:48466851..48466851	1	c.361A>T	p.K121*	c.166A>T	p.K56*
48466852	48508251	A>G	p.K66R	Nonsynonymous																																												NM_033629.6(TREX1)	c.197A>G
48466852		A>T	p.K66M	Nonsynonymous	c.197A>T	p.K66M	COSM140908	Substitution - Missense	TREX1_ENST00000625293	ENST00000625293.2	No	cSCCP8	1604874	Skin	Ear	NS	Carcinoma	Squamous cell carcinoma	NS	21984974	-	Confirmed Somatic	Tumour Sample	Unknown	3:48466852..48466852	1	c.362A>T	p.K121M	c.167A>T	p.K56M
48466853	48508252	G>A	p.K66K	Synonymous
48466857	48508256	T>G	p.S68A	Nonsynonymous	c.202T>G	p.S68A	COSM7106482	Substitution - Missense	TREX1_ENST00000625293	ENST00000625293.2	No	TCGA-E7-A6MD-01	2385757	Urinary tract	Bladder	NS	Carcinoma	NS	NS	-	413	Confirmed Somatic	Tumour Sample	Unknown	3:48466857..48466857	1	c.367T>G	p.S123A	c.172T>G	p.S58A	ENST00000422277.2:c.367T>G	p.Ser123Ala	p.S123A	1	BLCA	bladder	missense_variant	novel	123	Tcc/Gcc	367	.	possibly_damaging(0.875)	tolerated(0.09)	1028	48508256	48508256
48466860-48466861	48508259-48508260	dup	p.A72fs	Frameshift																																												NM_033629.6(TREX1)	c.212_213dup
48466861	48508260	del	p.V71Gfs*30	Frameshift+Stop_gained																											ENST00000422277.2:c.377_378del	p.Val126GlyfsTer30	p.V126Gfs*30	1	LGG	low_grade_glioma	frameshift_variant	rs74689946	124	cTG/c	371-372	.	.	.	1032-1033	48508260	48508261
48466861	48508260	T>C	pL69P	Nonsynonymous																																												NM_033629.6(TREX1)	c.206T>C
48466861-48466862	48508260-48508261	del	p.V71fs	Frameshift																																												NM_033629.6(TREX1)	c.212_213del
48466862		G>A	p.L69L	Synonymous
48466863		T>C	p.C70R	Nonsynonymous
48466864	48508263	G>C	p.C70S	Nonsynonymous																																												NM_033629.6(TREX1)	c.209G>C
48466865-48466866		inv	p.V71M	Nonsynonymous	c.210_211inv	p.V71M	COSM9823497	Substitution - Missense	TREX1_ENST00000625293	ENST00000625293.2	No	DD191_Org	2749233	Stomach	Gastroesophageal junction	NS	Carcinoma	Adenocarcinoma	NS	29703791	-	Confirmed Somatic	Cultured	Heterozygous	3:48466865..48466866	1	c.375_376inv	p.V126M	c.180_181inv	p.V61M
48466867	48508266	T>C	p.V71A	Nonsynonymous																																												NM_033629.6(TREX1)	c.212T>C
48466867-48466868	48508266-48508267	dup	p.A72Wfs*17	Frameshift+Stop_gained
48466873	48508272	C>T	p.P73L	Nonsynonymous																																												NM_033629.6(TREX1)	c.218C>T
48466874		G>A	p.P73P	Synonymous
48466877		G>A	p.G74G	Synonymous
48466879	48508278	A>G	p.K75R	Nonsynonymous																																												NM_033629.6(TREX1)	c.224A>G
48466881	48508280	G>T	p.A76S	Nonsynonymous																																												NM_033629.6(TREX1)	c.226G>T
48466881;48466891-48466898	;48508290-48508297	dup;dup	p.S82Lfs*9	Frameshift+Stop_gained
48466881-48466882	48508280-48508281	dup	p.S82fs	Frameshift																																												NM_033629.6(TREX1)	c.236_243dup
48466882-48466889	48508281-48508288	del	p.P79fs	Frameshift																																												NM_033629.6(TREX1)	c.236_243del
48466883		dup	p.C77Lfs*25	Frameshift+Stop_gained
48466884	48508283	T>C	p.C77R	Nonsynonymous																																												NM_033629.6(TREX1)	c.229T>C
48466888		G>T	p.S78I	Nonsynonymous	c.233G>T	p.S78I	COSM4735871	Substitution - Missense	TREX1_ENST00000625293	ENST00000625293.2	No	T407	2658314, 2296247	Large intestine	NS, Colon	NS, Transverse	Carcinoma	Adenocarcinoma	NS	27149842, 25344691	-	Confirmed Somatic	Unknown	Unknown	3:48466888..48466888	2	c.398G>T	p.S133I	c.203G>T	p.S68I
48466891		C>T	p.P79L	Nonsynonymous
48466894-48466897	48508293-48508296	del	p.S82fs	Frameshift																																												NM_033629.6(TREX1)	c.243_246del
48466894-48466895		delinsGG	p.A80G	Nonsynonymous	c.239_240delinsGG	p.A80G	COSM9823498	Substitution - Missense	TREX1_ENST00000625293	ENST00000625293.2	No	DD191_Org	2749233	Stomach	Gastroesophageal junction	NS	Carcinoma	Adenocarcinoma	NS	29703791	-	Confirmed Somatic	Cultured	Heterozygous	3:48466894..48466895	1	c.404_405delinsGG	p.A135G	c.209_210delinsGG	p.A70G
48466895	48508294	dup	p.A81Sfs*21	Frameshift+Stop_gained
48466896		G>A	p.A81T	Nonsynonymous
48466897	48508296	C>T	p.A81V	Nonsynonymous																																												NM_033629.6(TREX1)	c.242C>T
48466900		G>C	p.S82T	Nonsynonymous
48466901	48508300	C>A	p.S82R	Nonsynonymous																																												NM_033629.6(TREX1)	c.246C>A
48466901		C>T	p.S82S	Synonymous
48466902	48508301	G>A	p.E83K	Nonsynonymous																																												NM_033629.6(TREX1)	c.247G>A
48466902		G>C	p.E83Q	Nonsynonymous
48466903		A>G	p.E83G	Nonsynonymous
48466905	48508304	A>G	p.I84V	Nonsynonymous																																												NM_033629.6(TREX1)	c.250A>G
48466905		A>C	p.I84L	Nonsynonymous
48466906	48508305	T>C	p.I84T	Nonsynonymous																																												NM_033629.6(TREX1)	c.251T>C
48466906	48508305	T>G	p.I84S	Nonsynonymous																																												NM_033629.6(TREX1)	c.251T>G
48466911		G>A	p.G86S	Nonsynonymous
48466915	48508314	T>C	p.L87P	Nonsynonymous																											ENST00000422277.2:c.425T>C	p.Leu142Pro	p.L142P	1	TGCT	testicular	missense_variant	novel	142	cTg/cCg	425	.	probably_damaging(1)	deleterious(0)	1086	48508314	48508314	NM_033629.6(TREX1)	c.260T>C
48466916	48508315	G>C	p.L87L	Synonymous																											ENST00000422277.2:c.426G>C	p.Leu142=	p.L142=	1	BLCA	bladder	synonymous_variant	.	142	ctG/ctC	426	COSM1268492	.	.	1087	48508315	48508315
48466918	48508317	G>T	p.S88I	Nonsynonymous																																												NM_033629.6(TREX1)	c.263G>T
48466921		C>A	p.T89K	Nonsynonymous	c.266C>A	p.T89K	COSM9812692	Substitution - Missense	TREX1_ENST00000625293	ENST00000625293.2	No	DD191_Org; DD107_Org	2749233, 2749229	Stomach	Gastroesophageal junction, NS	NS	Carcinoma	Adenocarcinoma	NS	29703791	-	Confirmed Somatic	Cultured	Heterozygous	3:48466921..48466921	2	c.431C>A	p.T144K	c.236C>A	p.T79K
48466921		C>T	p.T89I	Nonsynonymous
48466923	48508322	G>A	p.A90T	Nonsynonymous																																												NM_033629.6(TREX1)	c.268G>A
48466926;48466926	48508325;	G>C;G>T	p.V91L	Nonsynonymous	;c.271G>T	;p.V91L	;COSM3732496	;Substitution - Missense	;TREX1_ENST00000625293	;ENST00000625293.2	;No	;258	;2146918	;Stomach	;Gastroesophageal junction	;NS	;Carcinoma	;Adenocarcinoma	;NS	;24308032	;-	;Confirmed Somatic	;Tumour Sample	;Unknown	;3:48466926..48466926	;1	;c.436G>T	;p.V146L	;c.241G>T	;p.V81L																		NM_033629.6(TREX1);	c.271G>C;
48466927		T>A	p.V91E	Nonsynonymous	c.272T>A	p.V91E	COSM9812693	Substitution - Missense	TREX1_ENST00000625293	ENST00000625293.2	No	DD107_Org; DD191_Org	2749229, 2749233	Stomach	NS, Gastroesophageal junction	NS	Carcinoma	Adenocarcinoma	NS	29703791	-	Confirmed Somatic	Cultured	Heterozygous	3:48466927..48466927	2	c.437T>A	p.V146E	c.242T>A	p.V81E
48466932	48508331	G>A	p.A93T	Nonsynonymous																																												NM_033629.6(TREX1)	c.277G>A
48466932	48508331	G>C	p.A93P	Nonsynonymous																																												NM_033629.6(TREX1)	c.277G>C
48466933		C>A	p.A93E	Nonsynonymous	c.278C>A	p.A93E	COSM5864709	Substitution - Missense	TREX1_ENST00000625293	ENST00000625293.2	No	Pat_06_A; DD191_Org	2513788, 2749233	NS, Stomach	NS, Gastroesophageal junction	NS	Malignant melanoma, Carcinoma	NS, Adenocarcinoma	NS	24265153, 29703791	-	Confirmed Somatic	Tumour Sample, Cultured	Unknown, Heterozygous	3:48466933..48466933	2	c.443C>A	p.A148E	c.248C>A	p.A83E
48466935		G>A	p.A94T	Nonsynonymous	c.280G>A	p.A94T	COSM6807705	Substitution - Missense	TREX1_ENST00000625293	ENST00000625293.2	No	T1202	2658262	Large intestine	NS	NS	Carcinoma	Adenocarcinoma	NS	27149842	-	Confirmed Somatic	Unknown	Unknown	3:48466935..48466935	1	c.445G>A	p.A149T	c.250G>A	p.A84T
48466936;48466936-48466937	48508335;	C>T;delinsTA	p.A94V	Nonsynonymous	;c.281_282delinsTA	;p.A94V	;COSM9823499	;Substitution - Missense	;TREX1_ENST00000625293	;ENST00000625293.2	;No	;DD191_Org	;2749233	;Stomach	;Gastroesophageal junction	;NS	;Carcinoma	;Adenocarcinoma	;NS	;29703791	;-	;Confirmed Somatic	;Cultured	;Heterozygous	;3:48466936..48466937	;1	;c.446_447delinsTA	;p.A149V	;c.251_252delinsTA	;p.A84V																		NM_033629.6(TREX1);	c.281C>T;
48466937		G>A	p.A94A	Synonymous
48466939	48508338	A>G	p.H95R	Nonsynonymous																																												NM_033629.6(TREX1)	c.284A>G
48466940		T>G	p.H95Q	Nonsynonymous	c.285T>G	p.H95Q	COSM9812694	Substitution - Missense	TREX1_ENST00000625293	ENST00000625293.2	No	DD191_Org; DD107_Org	2749233, 2749229	Stomach	Gastroesophageal junction, NS	NS	Carcinoma	Adenocarcinoma	NS	29703791	-	Confirmed Somatic	Cultured	Heterozygous	3:48466940..48466940	2	c.450T>G	p.H150Q	c.255T>G	p.H85Q
48466941	48508340	G>A	p.G96R	Nonsynonymous																																												NM_033629.6(TREX1)	c.286G>A
48466941	48508340	G>T	p.G96W	Nonsynonymous	c.286G>T	p.G96W	COSM8727782	Substitution - Missense	TREX1_ENST00000625293	ENST00000625293.2	No	TCGA-66-2754-01	1782524	Lung	NS	NS	Carcinoma	Squamous cell carcinoma	NS	-	418	Confirmed Somatic	Tumour Sample	Unknown	3:48466941..48466941	1	c.451G>T	p.G151W	c.256G>T	p.G86W	ENST00000422277.2:c.451G>T	p.Gly151Trp	p.G151W	1	LUSC	lung_squamous_cell	missense_variant	novel	151	Ggg/Tgg	451	.	probably_damaging(0.995)	deleterious(0.04)	1112	48508340	48508340
48466942	48508341	G>C	p.G96A	Nonsynonymous																																												NM_033629.6(TREX1)	c.287G>C
48466944	48508343	C>A	p.R97S	Nonsynonymous																																												NM_033629.6(TREX1)	c.289C>A
48466944	48508343	C>T	p.R97C	Nonsynonymous																																												NM_033629.6(TREX1)	c.289C>T
48466945	48508344	G>A	p.R97H	Nonsynonymous																																												NM_033629.6(TREX1)	c.290G>A
48466947		dup	p.C99Mfs*3	Frameshift+Stop_gained
48466947-48466948	48508346-48508347	dup	p.C99fs	Frameshift																																												NM_033629.6(TREX1)	c.294dup
48466949	48508348	dup	p.F100Lfs*3	Frameshift+Stop_gained
48466949		A>G	p.Q98Q	Synonymous
48466949-48466950	48508348-48508349	dup	p.F100fs	Frameshift																																												NM_033629.6(TREX1)	c.296_299dup
48466950		T>C	p.C99R	Nonsynonymous	c.295T>C	p.C99R	COSM9812695	Substitution - Missense	TREX1_ENST00000625293	ENST00000625293.2	No	DD107_Org; DD191_Org	2749229, 2749233	Stomach	NS, Gastroesophageal junction	NS	Carcinoma	Adenocarcinoma	NS	29703791	-	Confirmed Somatic	Cultured	Heterozygous	3:48466950..48466950	2	c.460T>C	p.C154R	c.265T>C	p.C89R
48466951	48508350	G>A	p.C99Y	Nonsynonymous																																												NM_033629.6(TREX1)	c.296G>A
48466954	48508353	T>C	p.F100S	Nonsynonymous																																												NM_033629.6(TREX1)	c.299T>C
48466955	48508354	T>A	p.F100L	Nonsynonymous																																												NM_033629.6(TREX1)	c.300T>A
48466956	48508355	G>A	p.D101N	Nonsynonymous	c.301G>A	p.D101N	COSM7671315	Substitution - Missense	TREX1_ENST00000625293	ENST00000625293.2	No	TCGA-3C-AALI-01	2386094	Breast	NS	NS	Carcinoma	NS	NS	-	414	Confirmed Somatic	Tumour Sample	Unknown	3:48466956..48466956	1	c.466G>A	p.D156N	c.271G>A	p.D91N	ENST00000422277.2:c.466G>A	p.Asp156Asn	p.D156N	1	BRCA	breast	missense_variant	novel	156	Gat/Aat	466	.	benign(0.013)	tolerated(0.29)	1127	48508355	48508355
48466956	48508355	G>C	p.D101H	Nonsynonymous	c.301G>C	p.D101H	COSM7148075	Substitution - Missense	TREX1_ENST00000625293	ENST00000625293.2	No	TCGA-SY-A9G5-01	2340129	Urinary tract	Bladder	NS	Carcinoma	NS	NS	-	413	Confirmed Somatic	Tumour Sample	Unknown	3:48466956..48466956	1	c.466G>C	p.D156H	c.271G>C	p.D91H	ENST00000422277.2:c.466G>C	p.Asp156His	p.D156H	1	BLCA	bladder	missense_variant	novel	156	Gat/Cat	466	.	possibly_damaging(0.893)	deleterious(0)	1127	48508355	48508355
48466958		T>C	p.D101D	Synonymous
48466959		G>A	p.D102N	Nonsynonymous	c.304G>A	p.D102N	COSM165117	Substitution - Missense	TREX1_ENST00000625293	ENST00000625293.2	No	PD4137a	1331107	Breast	NS	NS	Carcinoma	NS	NS	22722201	385	Confirmed Somatic	Tumour Sample	Unknown	3:48466959..48466959	1	c.469G>A	p.D157N	c.274G>A	p.D92N
48466961		C>T	p.D102D	Synonymous
48466963	48508362	A>T	p.N103I	Nonsynonymous																																												NM_033629.6(TREX1)	c.308A>T
48466964		C>T	p.N103N	Synonymous
48466965;48466967;48466967	;;48508366	C>T;G>A;G>C	p.L104L	Synonymous
48466966		T>C	p.L104P	Nonsynonymous
48466968		G>A	p.A105T	Nonsynonymous	c.313G>A	p.A105T	COSM1734721	Substitution - Missense	TREX1_ENST00000625293	ENST00000625293.2	No	ACINAR01	2068112	Pancreas	NS	NS	Carcinoma	Acinar carcinoma	NS	24293293	-	Confirmed Somatic	Tumour Sample	Unknown	3:48466968..48466968	1	c.478G>A	p.A160T	c.283G>A	p.A95T
48466970		C>T	p.A105A	Synonymous
48466972	48508371	A>G	p.N106S	Nonsynonymous																																												NM_033629.6(TREX1)	c.317A>G
48466972		A>T	p.N106I	Nonsynonymous	c.317A>T	p.N106I	COSM9823500	Substitution - Missense	TREX1_ENST00000625293	ENST00000625293.2	No	DD191_Org	2749233	Stomach	Gastroesophageal junction	NS	Carcinoma	Adenocarcinoma	NS	29703791	-	Confirmed Somatic	Cultured	Heterozygous	3:48466972..48466972	1	c.482A>T	p.N161I	c.287A>T	p.N96I
48466981		T>G	p.L109R	Nonsynonymous	c.326T>G	p.L109R	COSM9823501	Substitution - Missense	TREX1_ENST00000625293	ENST00000625293.2	No	DD191_Org	2749233	Stomach	Gastroesophageal junction	NS	Carcinoma	Adenocarcinoma	NS	29703791	-	Confirmed Somatic	Cultured	Heterozygous	3:48466981..48466981	1	c.491T>G	p.L164R	c.296T>G	p.L99R
48466984	48508383	C>G	p.A110G	Nonsynonymous																																												NM_033629.6(TREX1)	c.329C>G
48466985		C>T	p.A110A	Synonymous
48466989		C>T	p.L112L	Synonymous
48466992	48508391	C>G	p.R113G	Nonsynonymous																																												NM_033629.6(TREX1)	c.337C>G
48466992	48508391	C>T	p.R113W	Nonsynonymous																																												NM_033629.6(TREX1)	c.337C>T
48466993	48508392	G>A	p.R113Q	Nonsynonymous	c.338G>A	p.R113Q	COSM9823502	Substitution - Missense	TREX1_ENST00000625293	ENST00000625293.2	No	DD191_Org	2749233	Stomach	Gastroesophageal junction	NS	Carcinoma	Adenocarcinoma	NS	29703791	-	Confirmed Somatic	Cultured	Heterozygous	3:48466993..48466993	1	c.503G>A	p.R168Q	c.308G>A	p.R103Q																		NM_033629.6(TREX1)	c.338G>A
48466994	48508393	G>A	p.R113R	Synonymous
48466995	48508394	C>T	p.R114C	Nonsynonymous																																												NM_033629.6(TREX1)	c.340C>T
48466996	48508395	G>A	p.R114H	Nonsynonymous																																												NM_033629.6(TREX1)	c.341G>A
48466998		C>T	p.Q115*	Stop_gained	c.343C>T	p.Q115*	COSM4005556	Substitution - Nonsense	TREX1_ENST00000625293	ENST00000625293.2	No	B25-Tumor	2185752	Urinary tract	Bladder	NS	Carcinoma	NS	NS	-	581	Confirmed Somatic	Unknown	Unknown	3:48466998..48466998	1	c.508C>T	p.Q170*	c.313C>T	p.Q105*
48467000	48508399	G>T	p.Q115H	Nonsynonymous																																												NM_033629.6(TREX1)	c.345G>T
48467001	48508400	C>G	p.P116A	Nonsynonymous																																												NM_033629.6(TREX1)	c.346C>G
48467002	48508401	C>T	p.P116L	Nonsynonymous																																												NM_033629.6(TREX1)	c.347C>T
48467003	48508402	A>G	p.P116P	Synonymous
48467005		A>G	p.Q117R	Nonsynonymous
48467012	48508411	G>A	p.W119*	Stop_gained																																												NM_033629.6(TREX1)	c.357G>A
48467012		G>C	p.W119C	Nonsynonymous	c.357G>C	p.W119C	COSM9823503	Substitution - Missense	TREX1_ENST00000625293	ENST00000625293.2	No	DD191_Org	2749233	Stomach	Gastroesophageal junction	NS	Carcinoma	Adenocarcinoma	NS	29703791	-	Confirmed Somatic	Cultured	Heterozygous	3:48467012..48467012	1	c.522G>C	p.W174C	c.327G>C	p.W109C
48467016		C>T	p.L121L	Synonymous
48467020	48508419	T>C	p.V122A	Nonsynonymous																																												NM_033629.6(TREX1)	c.365T>C
48467021-48467023	48508420-48508422	dup	p.A123dup	Insertion
48467022	48508421	G>C	p.A123P	Nonsynonymous	c.367G>C	p.A123P	COSM7156324	Substitution - Missense	TREX1_ENST00000625293	ENST00000625293.2	No	TCGA-UY-A9PF-01	2385786	Urinary tract	Bladder	NS	Carcinoma	NS	NS	-	413	Confirmed Somatic	Tumour Sample	Unknown	3:48467022..48467022	1	c.532G>C	p.A178P	c.337G>C	p.A113P	ENST00000422277.2:c.532G>C	p.Ala178Pro	p.A178P	1	BLCA	bladder	missense_variant	novel	178	Gca/Cca	532	.	probably_damaging(0.994)	deleterious(0)	1193	48508421	48508421
48467024;48467024		A>C;A>G	p.A123A	Synonymous
48467025	48508424	C>G	p.H124D	Nonsynonymous																																												NM_033629.6(TREX1)	c.370C>G
48467029	48508428	A>G	p.N125S	Nonsynonymous																																												NM_033629.6(TREX1)	c.374A>G
48467029-48467030	48508428-48508429	dup	p.G126fs	Frameshift																																												NM_033629.6(TREX1)	c.375dup
48467030	48508429	dup	p.G126Wfs*2	Frameshift+Stop_gained
48467030	48508429	T>C	p.N124N	Synonymous
48467035	48508434	A>T	p.D127V	Nonsynonymous																																												NM_033629.6(TREX1)	c.380A>T
48467036		C>A	p.D127E	Nonsynonymous	c.381C>A	p.D127E	COSM382883	Substitution - Missense	TREX1_ENST00000625293	ENST00000625293.2	No	LUAD-RT-S01810	1765179	Lung	NS	NS	Carcinoma	Adenocarcinoma	NS	22980975	-	Variant of unknown origin	Tumour Sample	Unknown	3:48467036..48467036	1	c.546C>A	p.D182E	c.351C>A	p.D117E
48467037	48508436	C>T	p.R128C	Nonsynonymous																																												NM_033629.6(TREX1)	c.382C>T
-;48467038	;48508437	?;G>A	p.R128H	Nonsynonymous																																												;NM_033629.6(TREX1)	;c.383G>A
48467042	48508441	C>T	p.Y129Y	Synonymous
48467043	48508442	G>A	p.D130N	Nonsynonymous																																												NM_033629.6(TREX1)	c.388G>A
48467043	48508442	G>C	p.D130H	Nonsynonymous																																												NM_033629.6(TREX1)	c.388G>C
48467046	48508445	T>G	p.F131V	Nonsynonymous																																												NM_033629.6(TREX1)	c.391T>G
48467046;48467048	;48508447	T>C;C>G	p.F131L	Nonsynonymous																																												;NM_033629.6(TREX1)	;c.393C>G
48467047-48467048	48508446-48508447	dup	p.E137fs	Frameshift																																												NM_033629.6(TREX1)	c.393_408dup
48467048	48508447	del	p.L133fs	Frameshift																											ENST00000422277.2:c.562del	p.Leu188CysfsTer27	p.L188Cfs*27	1	STAD	stomach	frameshift_variant	rs78762691	186	ttC/tt	558	rs749667732	.	.	1219	48508447	48508447	NM_033629.6(TREX1)	c.397del
48467048-48467063	48508447-48508462	dup	p.E137Pfs*24	Frameshift+Stop_gained
48467049	48508448	C>A	p.P132T	Nonsynonymous																																												NM_033629.6(TREX1)	c.394C>A
48467049	48508448	C>G	p.P132A	Nonsynonymous																																												NM_033629.6(TREX1)	c.394C>G
48467049	48508448	C>T	p.P132S	Nonsynonymous																																												NM_033629.6(TREX1)	c.394C>T
48467052	48508451	del	p.L133Cfs*27	Frameshift+Stop_gained
48467052		C>G	p.L133V	Nonsynonymous
48467053-48467054	48508452-48508453	dup	p.L134fs	Frameshift																																												NM_033629.6(TREX1)	c.399dup
48467055	48508454	C>T	p.L134F	Nonsynonymous																																												NM_033629.6(TREX1)	c.400C>T
48467058	48508457	C>G	p.Q135E	Nonsynonymous																																												NM_033629.6(TREX1)	c.403C>G
48467058	48508457	C>T	p.Q135*	Stop_gained																																												NM_033629.6(TREX1)	c.403C>T
48467059		A>G	p.Q135R	Nonsynonymous
48467062	48508461	C>T	p.A136V	Nonsynonymous
48467063		A>C	splice_acceptor_variant	splice_acceptor_variant
48467065	48508464	A>C	p.E137A	Nonsynonymous																																												NM_033629.6(TREX1)	c.410A>C
48467067	48508466	C>G	p.L138V	Nonsynonymous																																												NM_033629.6(TREX1)	c.412C>G
48467068		del	p.A139Lfs*21	Frameshift+Stop_gained
48467070;48467070-48467071		del;del	p.A139Vfs*21	Frameshift+Stop_gained
48467070-48467071	48508469-48508470	del	p.A139Yfs*16	Frameshift+Stop_gained
48467071	48508470	del	p.A139fs	Frameshift																																												NM_033629.6(TREX1)	c.416del
48467072	48508471	T>C	p.A139A	Synonymous
48467073	48508472	A>G	p.M140V	Nonsynonymous	c.418A>G	p.M140V	COSM4602096	Substitution - Missense	TREX1_ENST00000625293	ENST00000625293.2	No	WSU-HN6	2296295	Upper aerodigestive tract	Head neck	NS	Carcinoma	Squamous cell carcinoma	NS	25275298	-	Variant of unknown origin	Cultured	Unknown	3:48467073..48467073	1	c.583A>G	p.M195V	c.388A>G	p.M130V																		NM_033629.6(TREX1)	c.418A>G
48467074	48508473	T>C	p.M140T	Nonsynonymous																																												NM_033629.6(TREX1)	c.419T>C
48467075		G>A	p.M140I	Nonsynonymous	c.420G>A	p.M140I	COSM9979299	Substitution - Missense	TREX1_ENST00000625293	ENST00000625293.2	No	EOSRC-IN-2497	2902090	Large intestine	Rectum	NS	Carcinoma	Adenocarcinoma	NS	33262464	-	Confirmed Somatic	Tumour Sample	Unknown	3:48467075..48467075	1	c.585G>A	p.M195I	c.390G>A	p.M130I
48467082	48508481	C>G	p.L143V	Nonsynonymous																																												NM_033629.6(TREX1)	c.427C>G
48467084	48508483	C>T	p.L143L	Synonymous
48467085	48508484	A>T	p.T144S	Nonsynonymous																																												NM_033629.6(TREX1)	c.430A>T
48467089	48508488	G>A	p.S145N	Nonsynonymous																																												NM_033629.6(TREX1)	c.434G>A
48467095		T>A	p.L147Q	Nonsynonymous
48467101	48508500	G>C	p.G149A	Nonsynonymous																																												NM_033629.6(TREX1)	c.446G>C
48467101	48508500	G>T	p.G149V	Nonsynonymous																																												NM_033629.6(TREX1)	c.446G>T
48467103		G>A	p.A150T	Nonsynonymous	c.448G>A	p.A150T	COSM6807708	Substitution - Missense	TREX1_ENST00000625293	ENST00000625293.2	No	T335135	2658230	Large intestine	NS	NS	Carcinoma	Adenocarcinoma	NS	27149842	-	Confirmed Somatic	Unknown	Unknown	3:48467103..48467103	1	c.613G>A	p.A205T	c.418G>A	p.A140T
48467108	48508507	C>G	p.F151L	Nonsynonymous																																												NM_033629.6(TREX1)	c.453C>G
48467114		G>A	p.V153V	Synonymous
48467117	48508516	T>C	p.D154D	Synonymous
48467118	48508517	A>G	p.S155G	Nonsynonymous																																												NM_033629.6(TREX1)	c.463A>G
48467119	48508518	G>C	p.S155T	Nonsynonymous	c.464G>C	p.S155T	COSM7760783	Substitution - Missense	TREX1_ENST00000625293	ENST00000625293.2	No	TCGA-67-3771-01	1780201	Lung	NS	NS	Carcinoma	Adenocarcinoma	NS	-	417	Confirmed Somatic	Tumour Sample	Unknown	3:48467119..48467119	1	c.629G>C	p.S210T	c.434G>C	p.S145T	ENST00000422277.2:c.629G>C	p.Ser210Thr	p.S210T	1	LUAD	lung_adenocarcinoma	missense_variant	.	210	aGc/aCc	629	COSM583899	possibly_damaging(0.465)	tolerated(0.32)	1290	48508518	48508518
48467122	48508521	del	p.I156Tfs*4	Frameshift+Stop_gained
48467123	48508522	C>G	p.I156M	Nonsynonymous																																												NM_033629.6(TREX1)	c.468C>G
48467123	48508522	C>T	p.I156I	Synonymous																											ENST00000422277.2:c.633C>T	p.Ile211=	p.I211=	1	SKCM	melanoma	synonymous_variant	novel	211	atC/atT	633	.	.	.	1294	48508522	48508522
48467124	48508523	A>G	p.T157A	Nonsynonymous																																												NM_033629.6(TREX1)	c.469A>G
48467125	48508524	C>G	p.T157S	Nonsynonymous																																												NM_033629.6(TREX1)	c.470C>G
48467128	48508527	C>T	p.A158V	Nonsynonymous																																												NM_033629.6(TREX1)	c.473C>T
48467129		G>A	p.A158A	Synonymous
48467132		G>A	p.L159L	Synonymous
48467133	48508532	A>C	p.K160Q	Nonsynonymous																																												NM_033629.6(TREX1)	c.478A>C
48467134		A>T	p.K160M	Nonsynonymous
48467141	48508540	G>A	p.L162L	Synonymous
48467143		A>G	p.E163G	Nonsynonymous	c.488A>G	p.E163G	COSM5014338	Substitution - Missense	TREX1_ENST00000625293	ENST00000625293.2	No	61	2370253	Kidney	NS	NS	Carcinoma	Papillary renal cell carcinoma	NS	25401301	-	Confirmed Somatic	Tumour Sample	Unknown	3:48467143..48467143	1	c.653A>G	p.E218G	c.458A>G	p.E153G
48467145	48508544	C>T	p.R164*	Stop_gained																																												NM_033629.6(TREX1)	c.490C>T
48467146	48508545	G>A	p.R164Q	Nonsynonymous	c.491G>A	p.R164Q	COSM6807706	Substitution - Missense	TREX1_ENST00000625293	ENST00000625293.2	No	TCGA-MV-A51V-01; T1791	2193279, 2658246	Urinary tract, Large intestine	Bladder, NS	NS	Carcinoma	NS, Adenocarcinoma	NS	-, 27149842	413, -	Confirmed Somatic	Unknown	Unknown	3:48467146..48467146	2	c.656G>A	p.R219Q	c.461G>A	p.R154Q	ENST00000422277.2:c.656G>A	p.Arg219Gln	p.R219Q	1	BLCA	bladder	missense_variant	rs143885312	219	cGa/cAa	656	rs143885312	benign(0.003)	tolerated(0.83)	1317	48508545	48508545	NM_033629.6(TREX1)	c.491G>A
48467146	48508545	G>C	p.R164P	Nonsynonymous																																												NM_033629.6(TREX1)	c.491G>C
48467149	48508548	C>A	p.A165E	Nonsynonymous																																												NM_033629.6(TREX1)	c.494C>A
48467152	48508551	G>C	p.S166T	Nonsynonymous																																												NM_033629.6(TREX1)	c.497G>C
48467154;48467155	;48508554	del;del	p.S167Tfs*13	Frameshift+Stop_gained																																												;NM_033629.6(TREX1)	;c.500del
48467155	48508554	G>A	p.S167N	Nonsynonymous																																												NM_033629.6(TREX1)	c.500G>A
48467156	48508555	C>T	p.S167S	Synonymous
48467159		C>G	p.P168P	Synonymous
48467161		C>G	p.S169*	Stop_gained	c.506C>G	p.S169*	COSM3373211	Substitution - Nonsense	TREX1_ENST00000625293	ENST00000625293.2	No	TCGA-DE-A0Y3-01	2121854	Thyroid	NS	NS	Carcinoma	NS	NS	-	542	Confirmed Somatic	Unknown	Unknown	3:48467161..48467161	1	c.671C>G	p.S224*	c.476C>G	p.S159*
48467163	48508562	G>A	p.E170K	Nonsynonymous																																												NM_033629.6(TREX1)	c.508G>A
48467163	48508562	G>T	p.E170*	Stop_gained																																												NM_033629.6(TREX1)	c.508G>T
48467164	48508563	A>G	p.E170G	Nonsynonymous																																												NM_033629.6(TREX1)	c.509A>G
48467168	48508567	del	p.H171fs	Frameshift																																												NM_033629.6(TREX1)	c.513del
48467168		C>T	p.H171H	Synonymous
48467169	48508568	G>A	p.G172S	Nonsynonymous	c.514G>A	p.G172S	COSM323974	Substitution - Missense	TREX1_ENST00000625293	ENST00000625293.2	No	19; 2334193	2497130, 1759433	Pancreas, Lung	Ampulla of Vater, NS	NS	Carcinoma	NS, Small cell carcinoma	NS	26806338, 22941189	-	Confirmed Somatic, Previously Reported	Tumour Sample, Cultured	Unknown	3:48467169..48467169	2	c.679G>A	p.G227S	c.484G>A	p.G162S																		NM_033629.6(TREX1)	c.514G>A
48467172		C>T	p.P173S	Nonsynonymous
48467175	48508574	A>G	p.R174G	Nonsynonymous																																												NM_033629.6(TREX1)	c.520A>G
48467176		G>A	p.R174K	Nonsynonymous
48467177		G>A	p.R174R	Synonymous
48467180;48467180	48508579;48508579	G>C;G>T	p.K175N	Nonsynonymous	c.525G>C;c.525G>T	p.K175N	COSM7110899;COSM8034255	Substitution - Missense	TREX1_ENST00000625293	ENST00000625293.2	No	TCGA-E7-A7DV-01;TCGA-ER-A19Q-06	2193219;2121727	Urinary tract;Skin	Bladder;NS	NS	Carcinoma;Malignant melanoma	NS	NS	-	413;540	Confirmed Somatic	Unknown	Unknown	3:48467180..48467180	1	c.690G>C;c.690G>T	p.K230N	c.495G>C;c.495G>T	p.K165N	ENST00000422277.2:c.690G>C;ENST00000422277.2:c.690G>T	p.Lys230Asn	p.K230N	1	BLCA;SKCM	bladder;melanoma	missense_variant	novel	230	aaG/aaC;aaG/aaT	690	.	possibly_damaging(0.662)	tolerated(0.08)	1351	48508579	48508579
48467181	48508580	A>G	p.S176G	Nonsynonymous																																												NM_033629.6(TREX1)	c.526A>G
48467182	48508581	G>T	p.S176I	Nonsynonymous																																												NM_033629.6(TREX1)	c.527G>T
48467185	48508584	A>G	p.Y177C	Nonsynonymous	c.530A>G	p177C	COSM8522230	Substitution - Missense	TREX1_ENST00000625293	ENST00000625293.2	No	36	2748008	Stomach	NS	NS	Carcinoma	NS	NS	-	683	Confirmed Somatic	Tumour Sample	Unknown	3:48467185..48467185	1	c.695A>G	p232C	c.500A>G	p167C																		NM_033629.6(TREX1)	c.530A>G
48467185-48467186		insCAGCCTAGGCAGCGCTA	p.I182Afs*4	Frameshift+Stop_gained	c.530_531insCAGCCTAGGCAGCGCTA	p.I182Afs*4	COSM9430711	Insertion - Frameshift	TREX1_ENST00000625293	ENST00000625293.2	No	EXTERN_MELA_20140505_038	2839416	Skin	Ear	NS	Malignant melanoma	NS	NS	28467829	-	Confirmed Somatic	Tumour Sample	Unknown	3:48467185..48467186	1	c.695_696insCAGCCTAGGCAGCGCTA	p.I237Afs*4	c.500_501insCAGCCTAGGCAGCGCTA	p.I172Afs*4
48467186;48467186	48508585;	C>T;T>C	p.Y177Y	Synonymous
48467191	48508590	T>C	p.L179P	Nonsynonymous																																												NM_033629.6(TREX1)	c.536T>C
48467193		G>A	p.G180S	Nonsynonymous	c.538G>A	p.G180S	COSM139455	Substitution - Missense	TREX1_ENST00000625293	ENST00000625293.2	No	cSCCP7	1604873	Skin	Face	NS	Carcinoma	Squamous cell carcinoma	NS	21984974	-	Confirmed Somatic	Tumour Sample	Unknown	3:48467193..48467193	1	c.703G>A	p.G235S	c.508G>A	p.G170S
48467195		C>A	p.G180G	Synonymous
48467195-48467196	48508594-48508595	dup	p.I182fs	Frameshift																																												NM_033629.6(TREX1)	c.541_544dup
48467198	48508597	C>T	p.S181S	Synonymous																											ENST00000422277.2:c.708C>T	p.Ser236=	p.S236=	1	PAAD	pancreas	synonymous_variant	rs948439253	236	agC/agT	708	.	.	.	1369	48508597	48508597
48467201		C>G	p.I182M	Nonsynonymous	c.546C>G	p.I182M	COSM9595112	Substitution - Missense	TREX1_ENST00000625293	ENST00000625293.2	No	S01496	2864349	Lung	NS	NS	Carcinoma	Large cell neuroendocrine carcinoma	NS	29535388	-	Confirmed Somatic	Tumour Sample	Unknown	3:48467201..48467201	1	c.711C>G	p.I237M	c.516C>G	p.I172M
48467203	48508602	A>G	p.Y183C	Nonsynonymous																																												NM_033629.6(TREX1)	c.548A>G
48467206		C>T	p.T184I	Nonsynonymous	c.551C>T	p.T184I	COSM5615293	Substitution - Missense	TREX1_ENST00000625293	ENST00000625293.2	No	LU-1991	2478820	Lung	NS	NS	Carcinoma	Adenocarcinoma	NS	22510280	-	Confirmed Somatic	Tumour Sample	Unknown	3:48467206..48467206	1	c.716C>T	p.T239I	c.521C>T	p.T174I
48467208	48508607	C>T	p.R185C	Nonsynonymous																																												NM_033629.6(TREX1)	c.553C>T
48467208		C>G	p.R185G	Nonsynonymous
48467209	48508608	G>A	p.R185H	Nonsynonymous																																												NM_033629.6(TREX1)	c.554G>A
48467210		C>T	p.R185R	Synonymous
48467211;48467213	;48508612	C>T;G>A	p.L186L	Synonymous																											;ENST00000422277.2:c.723G>A	;p.Leu241=	;p.L241=	;1	;UCEC	;endometrial	;synonymous_variant	;novel	;241	;ctG/ctA	;723	;.	;.	;.	;1384	;48508612	;48508612
48467217		G>A	p.G188R	Nonsynonymous
48467226	48508625	C>A	p.P191T	Nonsynonymous	c.571C>A	p.P191T	COSM7989177	Substitution - Missense	TREX1_ENST00000625293	ENST00000625293.2	No	TCGA-D3-A1Q3-06	2121499	Skin	NS	NS	Malignant melanoma	NS	NS	-	540	Confirmed Somatic	Unknown	Unknown	3:48467226..48467226	1	c.736C>A	p.P246T	c.541C>A	p.P181T	ENST00000422277.2:c.736C>A	p.Pro246Thr	p.P246T	1	SKCM	melanoma	missense_variant	rs750738235	246	Cct/Act	736	rs750738235	possibly_damaging(0.873)	deleterious(0.02)	1397	48508625	48508625
48467233	48508632	A>G	p.D193G	Nonsynonymous																																												NM_033629.6(TREX1)	c.578A>G
48467236	48508635	C>T	p.S194L	Nonsynonymous																																												NM_033629.6(TREX1)	c.581C>T
48467236	48508635	del	p.S194fs	Frameshift																																												NM_033629.6(TREX1)	c.581del
48467237		G>A	p.S194S	Synonymous
48467241	48508640	A>G	p.T196A	Nonsynonymous																																												NM_033629.6(TREX1)	c.586A>G
48467242	48508641	C>T	p.T196M	Nonsynonymous																																												NM_033629.6(TREX1)	c.587C>T
48467243		G>A	p.T196T	Synonymous
48467245	48508644	C>T	p.A197V	Nonsynonymous																																												NM_033629.6(TREX1)	c.590C>T
48467246		T>C	p.A197A	Synonymous
48467247	48508646	G>A	p.E198K	Nonsynonymous																																												NM_033629.6(TREX1)	c.592G>A
48467251		dup	p.D200dup	Insertion
48467253	48508652	G>A	p.D200N	Nonsynonymous																																												NM_033629.6(TREX1)	c.598G>A
48467253	48508652	G>C	p.D200H	Nonsynonymous
48467253		dup	p.V201Mfs*77	Frameshift+Stop_gained
48467253-48467254	48508652-48508653	dup	p.L202fs	Frameshift																																												NM_033629.6(TREX1)	c.599_602dup
48467254-48467256	48508653-48508655	dup	p.D200dup	Insertion
48467257	48508656	T>A	p.V201D	Nonsynonymous																																												NM_033629.6(TREX1)	c.602T>A
48467260	48508659	T>G	p.L202R	Nonsynonymous																																												NM_033629.6(TREX1)	c.605T>G
48467262	48508661	G>A	p.A203T	Nonsynonymous																																												NM_033629.6(TREX1)	c.607G>A
48467263	48508662	C>T	p.A203V	Nonsynonymous																																												NM_033629.6(TREX1)	c.608C>T
48467264-48467317	48508663-48508716	dup	p.L204_A221dup	Insertion
48467271	48508670	A>G	p.S206G	Nonsynonymous																																												NM_033629.6(TREX1)	c.616A>G
48467272	48508671	G>A	p.S206N	Nonsynonymous																																												NM_033629.6(TREX1)	c.617G>A
48467275-48467276	48508674-48508675	del	p.I207fs	Frameshift																																												NM_033629.6(TREX1)	c.621_622del
48467276	48508675	C>G	p.I207M	Nonsynonymous																																												NM_033629.6(TREX1)	c.621C>G
48467276		C>T	p.I207I	Synonymous
48467277;48467280-48467283	;48508679-48508682	dup;dup	p.W210Sfs*32	Frameshift+Stop_gained
48467277-48467278	48508676-48508677	dup	p.W210fs	Frameshift																																												NM_033629.6(TREX1)	c.625_628dup
48467278	48508677	G>C	p.C208S	Nonsynonymous																																												NM_033629.6(TREX1)	c.623G>C
48467280		C>A	p.Q209K	Nonsynonymous
48467281		A>G	p.Q209R	Nonsynonymous	c.626A>G	p.Q209R	COSM6807709	Substitution - Missense	TREX1_ENST00000625293	ENST00000625293.2	No	T3422	2658323	Large intestine	NS	NS	Carcinoma	Adenocarcinoma	NS	27149842	-	Confirmed Somatic	Unknown	Unknown	3:48467281..48467281	1	c.791A>G	p.Q264R	c.596A>G	p.Q199R
48467282	48508681	G>C	p.Q209H	Nonsynonymous																																												NM_033629.6(TREX1)	c.627G>C
48467282		G>A	p.Q209Q	Synonymous
48467283	48508682	T>C	p.W210R	Nonsynonymous	c.628T>C	p.W210R	COSM480210	Substitution - Missense	TREX1_ENST00000625293	ENST00000625293.2	No	TCGA-CJ-5682-01	1779994	Kidney	NS	NS	Carcinoma	Clear cell renal cell carcinoma	NS	-	416	Confirmed Somatic	Tumour Sample	Unknown	3:48467283..48467283	1	c.793T>C	p.W265R	c.598T>C	p.W200R	ENST00000422277.2:c.793T>C	p.Trp265Arg	p.W265R	1	KIRC	kidney_clear_cell	missense_variant	rs770775387	265	Tgg/Cgg	793	rs770775387,COSM480210	probably_damaging(0.989)	tolerated(0.2)	1454	48508682	48508682	NM_033629.6(TREX1)	c.628T>C
48467284	48508683	G>A	p.W210*	Stop_gained																																												NM_033629.6(TREX1)	c.629G>A
48467287	48508686	G>A	p.R211K	Nonsynonymous																																												NM_033629.6(TREX1)	c.632G>A
48467287	48508686	G>T	p.R211I	Nonsynonymous																																												NM_033629.6(TREX1)	c.632G>T
48467288	48508687	A>C	p.R211S	Nonsynonymous																																												NM_033629.6(TREX1)	c.633A>C
48467288		A>G	p.R211R	Synonymous
48467288		del	p.P212Hfs*65	Frameshift+Stop_gained
48467289	48508688	del	p.P212fs	Frameshift																																												NM_033629.6(TREX1)	c.635del
48467290	48508689	del	p.P212Hfs*65	Frameshift+Stop_gained
48467293	48508692	A>G	p.Q213R	Nonsynonymous																																												NM_033629.6(TREX1)	c.638A>G
48467295	48508694	G>A	p.A214T	Nonsynonymous																																												NM_033629.6(TREX1)	c.640G>A
48467300		G>A	p.L215L	Synonymous
48467302	48508701	T>C	p.L216P	Nonsynonymous																																												NM_033629.6(TREX1)	c.647T>C
48467304	48508703	C>T	p.R217W	Nonsynonymous																																												NM_033629.6(TREX1)	c.649C>T
48467305	48508704	G>A	p.R217Q	Nonsynonymous																																												NM_033629.6(TREX1)	c.650G>A
48467306	48508705	G>A	p.R217R	Synonymous
48467308	48508707	G>T	p.W218L	Nonsynonymous	c.653G>T	p.W218L	COSM8114019	Substitution - Missense	TREX1_ENST00000625293	ENST00000625293.2	No	TCGA-D3-A3C6-06	2121528	Skin	NS	NS	Malignant melanoma	NS	NS	-	540	Confirmed Somatic	Unknown	Unknown	3:48467308..48467308	1	c.818G>T	p.W273L	c.623G>T	p.W208L	ENST00000422277.2:c.818G>T	p.Trp273Leu	p.W273L	1	SKCM	melanoma	missense_variant	novel	273	tGg/tTg	818	.	probably_damaging(1)	deleterious(0)	1479	48508707	48508707
48467309		G>C	p.W218C	Nonsynonymous	c.654G>C	p.W218C	COSM1617721	Substitution - Missense	TREX1_ENST00000625293	ENST00000625293.2	No	HCC71T; HCC71	1919230, 2120874	Liver	NS	NS	Carcinoma	NS	NS	-	323	Previously Reported, Confirmed Somatic	Tumour Sample, Unknown	Heterozygous, Unknown	3:48467309..48467309	2	c.819G>C	p.W273C	c.624G>C	p.W208C
48467310		G>A	p.V219M	Nonsynonymous
48467314	48508713	A>G	p.D220G	Nonsynonymous
48467321;48467321	48508720;48508720	C>A;C>G	p.H222Q	Nonsynonymous																																												NM_033629.6(TREX1)	c.666C>A;c.666C>G
48467322	48508721	G>A	p.A223T	Nonsynonymous																																												NM_033629.6(TREX1)	c.667G>A
48467324		C>T	p.A223A	Synonymous
48467326		G>T	p.R224M	Nonsynonymous	c.671G>T	p.R224M	COSM4118202	Substitution - Missense	TREX1_ENST00000625293	ENST00000625293.2	No	TCGA-CD-A4MG-01	2198123	Stomach	NS	NS	Carcinoma	Adenocarcinoma	NS	-	541	Confirmed Somatic	Unknown	Unknown	3:48467326..48467326	1	c.836G>T	p.R279M	c.641G>T	p.R214M
48467331;48467333	48508730;48508732	T>C;C>G	p.F226L	Nonsynonymous																																												NM_033629.6(TREX1)	c.676T>C;c.678C>G
48467333		C>T	p.F226F	Synonymous
48467334	48508733	G>A	p.G227S	Nonsynonymous																																												NM_033629.6(TREX1)	c.679G>A
48467338		C>T	p.T228I	Nonsynonymous
48467338		dup	p.I229dup	Insertion
48467339	48508738	C>A	p.T228T	Synonymous																											ENST00000422277.2:c.849C>A	p.Thr283=	p.T283=	1	SKCM	melanoma	synonymous_variant	novel	283	acC/acA	849	.	.	.	1510	48508738	48508738
48467340	48508739	A>G	p.I229V	Nonsynonymous																																												NM_033629.6(TREX1)	c.685A>G
48467345	48508744	G>C	p.R230S	Nonsynonymous																																												NM_033629.6(TREX1)	c.690G>C
48467345		G>A	p.R230R	Synonymous
48467348	48508747	dup	p.M232Hfs*9	Frameshift+Stop_gained
48467349	48508748	A>G	p.M232V	Nonsynonymous																																												NM_033629.6(TREX1)	c.694A>G
48467350	48508749	T>G	p.M232R	Nonsynonymous																																												NM_033629.6(TREX1)	c.695T>G
48467351		G>T	p.M232I	Nonsynonymous
48467354-48467355	48508753-48508754	dup	p.V235fs	Frameshift																																												NM_033629.6(TREX1)	c.703dup
48467355	48508754	G>T	p.G234W	Nonsynonymous																																												NM_033629.6(TREX1)	c.700G>T
48467357-48467358	48508756-48508757	dup	p.T236fs	Frameshift																																												NM_033629.6(TREX1)	c.703_706dup
48467358;48467358-48467359	48508757;	dup;dup	p.V235Gfs*6	Frameshift+Stop_gained	;c.703dup	;p.V235Gfs*6	;COSM10051203	;Insertion - Frameshift	;TREX1_ENST00000625293	;ENST00000625293.2	;No	;CRC237	;2730815	;Large intestine	;Colon	;NS	;Carcinoma	;Adenocarcinoma	;NS	;26416732	;-	;Confirmed Somatic	;Cultured	;Unknown	;3:48467358..48467359	;1	;c.868dup	;p.V290Gfs*6	;c.673dup	;p.V225Gfs*6
48467359	48508758	T>G	p.V235G	Nonsynonymous																																												NM_033629.6(TREX1)	c.704T>G
48467361	48508760	A>G	p.T236A	Nonsynonymous	c.706A>G	p.T236A	COSM8316010	Substitution - Missense	TREX1_ENST00000625293	ENST00000625293.2	No	TCGA-F7-A624-01	2193851	Upper aerodigestive tract	Head neck	NS	Carcinoma	Squamous cell carcinoma	NS	-	627	Confirmed Somatic	Unknown	Unknown	3:48467361..48467361	1	c.871A>G	p.T291A	c.676A>G	p.T226A	ENST00000422277.2:c.871A>G	p.Thr291Ala	p.T291A	1	HNSC	head_and_neck	missense_variant	.	291	Aca/Gca	871	COSM3993122	benign(0.011)	tolerated_low_confidence(0.16)	1532	48508760	48508760
48467361	48508760	A>T	p.T236S	Nonsynonymous	c.706A>T	p.T236S	COSM3993122	Substitution - Missense	TREX1_ENST00000625293	ENST00000625293.2	No	TCGA-A4-7585-01	2194073	Kidney	NS	NS	Carcinoma	Papillary renal cell carcinoma	NS	-	543	Confirmed Somatic	Unknown	Unknown	3:48467361..48467361	1	c.871A>T	p.T291S	c.676A>T	p.T226S	ENST00000422277.2:c.871A>T	p.Thr291Ser	p.T291S	1	KIRP	kidney_papillary_cell	missense_variant	.	291	Aca/Tca	871	COSM3993122	benign(0.121)	tolerated_low_confidence(0.06)	1532	48508760	48508760
48467361	48508760	dup	p.T236Nfs*5	Frameshift+Stop_gained
48467369		T>G	p.S238S	Synonymous
48467374	48508773	G>A	p.R240K	Nonsynonymous																																												NM_033629.6(TREX1)	c.719G>A
48467375	48508774	G>A	p.R240R	Synonymous
48467375	48508774	G>C	p.R240S	Nonsynonymous																																												NM_033629.6(TREX1)	c.720G>C
48467376		A>T	p.T241S	Nonsynonymous
48467381		G>A	p.K242K	Synonymous
48467383	48508782	C>G	p.P243R	Nonsynonymous																																												NM_033629.6(TREX1)	c.728C>G
48467388	48508787	C>T	p.P245S	Nonsynonymous																																												NM_033629.6(TREX1)	c.733C>T
48467388		dup	p.S246dup	Insertion
48467389	48508788	C>G	p.P245R	Nonsynonymous																																												NM_033629.6(TREX1)	c.734C>G
48467389		C>T	p.P245L	Nonsynonymous	c.734C>T	p.P245L	COSM3070402	Substitution - Missense	TREX1_ENST00000625293	ENST00000625293.2	No	KM12	2301990	Large intestine	NS	NS	Carcinoma	Adenocarcinoma	NS	24755471	-	Variant of unknown origin	Cultured	Heterozygous	3:48467389..48467389	1	c.899C>T	p.P300L	c.704C>T	p.P235L
48467390		A>C	p.P245P	Synonymous
48467393		T>G	p.S246S	Synonymous
48467394	48508793	G>A	p.A247T	Nonsynonymous																																												NM_033629.6(TREX1)	c.739G>A
48467394	48508793	G>C	p.A247P	Nonsynonymous																																												NM_033629.6(TREX1)	c.739G>C
48467395	48508794	C>T	p.A247V	Nonsynonymous	c.740C>T	p.A247V	COSM6807710	Substitution - Missense	TREX1_ENST00000625293	ENST00000625293.2	No	T3646	2658258	Large intestine	NS	NS	Carcinoma	Adenocarcinoma	NS	27149842	-	Confirmed Somatic	Unknown	Unknown	3:48467395..48467395	1	c.905C>T	p.A302V	c.710C>T	p.A237V																		NM_033629.6(TREX1)	c.740C>T
48467398-48467401	48508797-48508800	dup	p.T250Hfs*13	Frameshift+Stop_gained
48467401	48508800	C>T	p.T249I	Nonsynonymous																																												NM_033629.6(TREX1)	c.746C>T
48467401		C>A	p.T249K	Nonsynonymous
48467401-48467402	48508800-48508801	dup	p.T250fs	Frameshift																																												NM_033629.6(TREX1)	c.748dup
48467404	48508803	C>T	p.T250I	Nonsynonymous																																												NM_033629.6(TREX1)	c.749C>T
48467404		C>G	p.T250S	Nonsynonymous	c.749C>G	p.T250S	COSM9230296	Substitution - Missense	TREX1_ENST00000625293	ENST00000625293.2	No	F69_329967	2815722	Large intestine	Rectum	NS	Carcinoma	Adenocarcinoma	NS	31660073	-	Confirmed Somatic	Tumour Sample	Unknown	3:48467404..48467404	1	c.914C>G	p.T305S	c.719C>G	p.T240S
48467407	48508806	C>T	p.T251I	Nonsynonymous																																												NM_033629.6(TREX1)	c.752C>T
48467412	48508811	C>G	p.H253D	Nonsynonymous																																												NM_033629.6(TREX1)	c.757C>G
48467412	48508811	C>T	p.H253Y	Nonsynonymous																																												NM_033629.6(TREX1)	c.757C>T
48467413	48508812	A>G	p.H253R	Nonsynonymous																																												NM_033629.6(TREX1)	c.758A>G
48467415		C>G	p.L254V	Nonsynonymous	c.760C>G	p.L254V	COSM1162199	Substitution - Missense	TREX1_ENST00000625293	ENST00000625293.2	No	PA018	1820268	Pancreas	NS	NS	Carcinoma	Ductal carcinoma	NS	22156295	-	Confirmed Somatic	Cultured	Unknown	3:48467415..48467415	1	c.925C>G	p.L309V	c.730C>G	p.L244V
48467421		del	p.T256Kfs*21	Frameshift+Stop_gained
48467422	48508821	del	p.T256fs	Frameshift																																												NM_033629.6(TREX1)	c.767del
48467425	48508824	C>T	p.T257I	Nonsynonymous																																												NM_033629.6(TREX1)	c.770C>T
48467435-48467436	48508834-48508835	del	p.P262fs	Frameshift																																												NM_033629.6(TREX1)	c.780_781del
48467437	48508836	del	p.S261Ifs*16	Frameshift+Stop_gained
48467437	48508836	G>A	p.S261N	Nonsynonymous																																												NM_033629.6(TREX1)	c.782G>A
48467439	48508838	C>T	p.P262S	Nonsynonymous																																												NM_033629.6(TREX1)	c.784C>T
48467442	48508841	A>G	p.S263G	Nonsynonymous																																												NM_033629.6(TREX1)	c.787A>G
48467443	48508842	G>A	p.S263N	Nonsynonymous																																												NM_033629.6(TREX1)	c.788G>A
48467448		G>A	p.G265R	Nonsynonymous
48467449		G>C	p.G265A	Nonsynonymous	c.794G>C	p.G265A	COSM345536	Substitution - Missense	TREX1_ENST00000625293	ENST00000625293.2	No	LUAD-S01315	1765261	Lung	NS	NS	Carcinoma	Adenocarcinoma	NS	22980975	-	Variant of unknown origin	Tumour Sample	Unknown	3:48467449..48467449	1	c.959G>C	p.G320A	c.764G>C	p.G255A
48467449		G>T	p.G265V	Nonsynonymous	c.794G>T	p.G265V	COSM730661	Substitution - Missense	TREX1_ENST00000625293	ENST00000625293.2	No	TCGA-39-5039-01	1781598	Lung	NS	NS	Carcinoma	Squamous cell carcinoma	NS	-	418	Confirmed Somatic	Tumour Sample	Unknown	3:48467449..48467449	1	c.959G>T	p.G320V	c.764G>T	p.G255V
48467449-48467450	48508848-48508849	dup	p.R268fs	Frameshift																																												NM_033629.6(TREX1)	c.795_802dup
48467451	48508850	G>T	p.E266*	Stop_gained																																												NM_033629.6(TREX1)	c.796G>T
48467452	48508851	A>G	p.E266G	Nonsynonymous	c.797A>G	p.E266G	COSM7394905	Substitution - Missense	TREX1_ENST00000625293	ENST00000625293.2	No	H125	2776318	Lung	NS	NS	Carcinoma	Mixed adenosquamous carcinoma	NS	29681454	-	Variant of unknown origin	Unknown	Unknown	3:48467452..48467452	1	c.962A>G	p.E321G	c.767A>G	p.E256G																		NM_033629.6(TREX1)	c.797A>G
48467453		G>C	p.E266D	Nonsynonymous
48467453-48467454	48508852-48508853	dup	p.S267fs	Frameshift																																												NM_033629.6(TREX1)	c.799dup
48467454		A>G	p.S267G	Nonsynonymous
48467457	48508856	del	p.R268fs	Frameshift																																												NM_033629.6(TREX1)	c.802del
48467458	48508857	del	p.G269fs	Frameshift																																												NM_033629.6(TREX1)	c.806del
48467458	48508857	G>A	p.R268K	Nonsynonymous																																												NM_033629.6(TREX1)	c.803G>A
48467458	48508857	G>C	p.R268T	Nonsynonymous																																												NM_033629.6(TREX1)	c.803G>C
48467460	48508859	G>A	p.G269S	Nonsynonymous																																												NM_033629.6(TREX1)	c.805G>A
48467461	48508860	G>A	p.G269D	Nonsynonymous																																												NM_033629.6(TREX1)	c.806G>A
48467462		T>C	p.G269G	Synonymous
48467467-48467468	48508866-48508867	dup	p.D272Rfs*6	Frameshift+Stop_gained
48467468	48508867	del	p.D272fs	Frameshift																																												NM_033629.6(TREX1)	c.814del
48467468		G>A	p.K271K	Synonymous
48467470	48508869	A>C	p.D272A	Nonsynonymous																																												NM_033629.6(TREX1)	c.815A>C
48467471	48508870	T>C	p.D272D	Synonymous																											ENST00000422277.2:c.981T>C	p.Asp327=	p.D327=	1	ESCA	esophagus	synonymous_variant	novel	327	gaT/gaC	981	.	.	.	1642	48508870	48508870
48467472	48508871	C>G	p.L273V	Nonsynonymous																																												NM_033629.6(TREX1)	c.817C>G
48467472	48508871	C>T	p.L273F	Nonsynonymous																																												NM_033629.6(TREX1)	c.817C>T
48467476		C>T	p.P274L	Nonsynonymous
48467482-48467483	48508881-48508882	dup	p.D278fs	Frameshift																																												NM_033629.6(TREX1)	c.830_833dup
48467483		G>A	p.V276V	Synonymous
48467484	48508883	A>T	p.K277*	Stop_gained																																												NM_033629.6(TREX1)	c.829A>T
48467488	48508887	A>T	p.D278V	Nonsynonymous																																												NM_033629.6(TREX1)	c.833A>T
48467491		C>A	p.P279H	Nonsynonymous	c.836C>A	p.P279H	COSM3673987	Substitution - Missense	TREX1_ENST00000625293	ENST00000625293.2	No	TCGA-CH-5739-01	1797153	Prostate	NS	NS	Carcinoma	Adenocarcinoma	NS	-	435	Confirmed Somatic	Tumour Sample	Unknown	3:48467491..48467491	1	c.1001C>A	p.P334H	c.806C>A	p.P269H
48467492		del	p.G280Efs*18	Frameshift+Stop_gained
48467493		G>A	p.G280R	Nonsynonymous	c.838G>A	p.G280R	COSM9908184	Substitution - Missense	TREX1_ENST00000625293	ENST00000625293.2	No	PD42111a	2894820	Skin	Trunk	NS	Malignant melanoma	Superficial spreading	NS	33024263	-	Variant of unknown origin	Tumour Sample	Unknown	3:48467493..48467493	1	c.1003G>A	p.G335R	c.808G>A	p.G270R
48467494	48508893	G>T	p.G280V	Nonsynonymous	c.839G>T	p.G280V	COSM7110900	Substitution - Missense	TREX1_ENST00000625293	ENST00000625293.2	No	TCGA-E7-A7DV-01	2193219	Urinary tract	Bladder	NS	Carcinoma	NS	NS	-	413	Confirmed Somatic	Unknown	Unknown	3:48467494..48467494	1	c.1004G>T	p.G335V	c.809G>T	p.G270V	ENST00000422277.2:c.1004G>T	p.Gly335Val	p.G335V	1	BLCA	bladder	missense_variant	novel	335	gGa/gTa	1004	.	possibly_damaging(0.56)	deleterious_low_confidence(0.04)	1665	48508893	48508893
48467498		C>T	p.A281A	Synonymous
48467501		A>G	p.L282L	Synonymous
48467503		C>G	p.S283C	Nonsynonymous	c.848C>G	p.S283C	COSM6353871	Substitution - Missense	TREX1_ENST00000625293	ENST00000625293.2	No	KPOPBR-072-T	2633627	Breast	NS	NS	Carcinoma	NS	NS	-	669	Confirmed Somatic	Tumour Sample	Unknown	3:48467503..48467503	1	c.1013C>G	p.S338C	c.818C>G	p.S273C
48467505	48508904	dup	p.R284Kfs*41	Frameshift+Stop_gained
48467509	48508908	A>T	p.E285V	Nonsynonymous																																												NM_033629.6(TREX1)	c.854A>T
48467509-48467510	48508908-48508909	dup	p.L287fs	Frameshift																																												NM_033629.6(TREX1)	c.858dup
48467511	48508910	G>A	p.G286R	Nonsynonymous	c.856G>A	p.G286R	COSM8230343	Substitution - Missense	TREX1_ENST00000625293	ENST00000625293.2	No	TCGA-EM-A2CS-06	2185868	Thyroid	NS	NS	Carcinoma	NS	NS	-	542	Confirmed Somatic	Unknown	Unknown	3:48467511..48467511	1	c.1021G>A	p.G341R	c.826G>A	p.G276R
48467511-48467520	48508910-48508919	dup	p.A289Gfs*39	Frameshift+Stop_gained
48467512	48508911	G>A	p.G286E	Nonsynonymous																																												NM_033629.6(TREX1)	c.857G>A
48467513	48508912	del	p.L287Cfs*11	Frameshift+Stop_gained
48467513	48508912	dup	p.L287Afs*38	Frameshift+Stop_gained
48467521	48508920	C>T	p.A289V	Nonsynonymous																											ENST00000422277.2:c.1031C>T	p.Ala344Val	p.A344V	1	LGG	low_grade_glioma	missense_variant	rs770518906	344	gCc/gTc	1031	rs770518906	benign(0.119)	deleterious_low_confidence(0.04)	1692	48508920	48508920
48467523-48467540	48508922-48508939	del	p.P290_A295del	Deletion
48467524	48508923	C>T	p.P290L	Nonsynonymous																																												NM_033629.6(TREX1)	c.869C>T
48467525		A>G	p.P290P	Synonymous
48467526		C>A	p.L291M	Nonsynonymous	c.871C>A	p.L291M	COSM7394904	Substitution - Missense	TREX1_ENST00000625293	ENST00000625293.2	No	HCC1195	2776293	Lung	NS	NS	Carcinoma	Adenocarcinoma	NS	29681454	-	Variant of unknown origin	Unknown	Unknown	3:48467526..48467526	1	c.1036C>A	p.L346M	c.841C>A	p.L281M
48467530		G>A	p.G292D	Nonsynonymous	c.875G>A	p.G292D	COSM5864710	Substitution - Missense	TREX1_ENST00000625293	ENST00000625293.2	No	Pat_28_B	2513795	NS	NS	NS	Malignant melanoma	NS	NS	24265153	-	Confirmed Somatic	Tumour Sample	Unknown	3:48467530..48467530	1	c.1040G>A	p.G347D	c.845G>A	p.G282D
48467532	48508931	C>G	p.L293V	Nonsynonymous																																												NM_033629.6(TREX1)	c.877C>G
48467534		G>C	p.L293L	Synonymous
48467540		C>T	p.A295A	Synonymous
48467543	48508942	C>T	p.I296I	Synonymous																											ENST00000422277.2:c.1053C>T	p.Ile351=	p.I351=	1	COADREAD	colorectal	synonymous_variant	novel	351	atC/atT	1053	.	.	.	1714	48508942	48508942
48467544		C>T	p.L297L	Synonymous
48467547	48508946	A>T	p.T298S	Nonsynonymous																																												NM_033629.6(TREX1)	c.892A>T
48467549		C>T	p.T298T	Synonymous
48467550	48508949	T>G	p.L299V	Nonsynonymous																																												NM_033629.6(TREX1)	c.895T>G
48467552-48467553	48508951-48508952	dup	p.V301fs	Frameshift																																												NM_033629.6(TREX1)	c.898_899dup
48467554	48508953	C>T	p.A300V	Nonsynonymous																																												NM_033629.6(TREX1)	c.899C>T
48467557	48508956	T>C	p.V301A	Nonsynonymous	c.902T>C	p.V301A	COSM8760509	Substitution - Missense	TREX1_ENST00000625293	ENST00000625293.2	No	TCGA-94-8490-01	2340065	Lung	NS	NS	Carcinoma	Squamous cell carcinoma	NS	-	418	Confirmed Somatic	Tumour Sample	Unknown	3:48467557..48467557	1	c.1067T>C	p.V356A	c.872T>C	p.V291A	ENST00000422277.2:c.1067T>C	p.Val356Ala	p.V356A	1	LUSC	lung_squamous_cell	missense_variant	novel	356	gTa/gCa	1067	.	benign(0.229)	deleterious_low_confidence(0)	1728	48508956	48508956
48467559		G>T	p.A302S	Nonsynonymous
48467561-48467562	48508960-48508961	del	p.L304fs	Frameshift																																												NM_033629.6(TREX1)	c.909_910del
48467562	48508961	A>C	p.T303P	Nonsynonymous																																												NM_033629.6(TREX1)	c.907A>C
48467562-48467565	48508961-48508964	dup	p.L304Hfs*22	Frameshift+Stop_gained
48467563	48508962	C>T	p.T303I	Nonsynonymous																																												NM_033629.6(TREX1)	c.908C>T
48467566-48467569	48508965-48508968	del	p305fs	Frameshift																																												NM_033629.6(TREX1)	c.913_916del
48467567	48508966	G>A	p.L304L	Synonymous
48467569	48508968	A>G	p.Y305C	Nonsynonymous																																												NM_033629.6(TREX1)	c.914A>G
48467570		T>C	p.Y305Y	Synonymous
48467571	48508970	G>A	p.G306R	Nonsynonymous																																												NM_033629.6(TREX1)	c.916G>A
48467571	48508970	G>T	p.G306*	Stop_gained	c.916G>T	p.G306*	COSM7875599	Substitution - Nonsense	TREX1_ENST00000625293	ENST00000625293.2	No	TCGA-EE-A2MD-06	2121676	Skin	NS	NS	Malignant melanoma	NS	NS	-	540	Confirmed Somatic	Unknown	Unknown	3:48467571..48467571	1	c.1081G>T	p.G361*	c.886G>T	p.G296*	ENST00000422277.2:c.1081G>T	p.Gly361Ter	p.G361*	1	SKCM	melanoma	stop_gained	novel	361	Gga/Tga	1081	.	.	.	1742	48508970	48508970	NM_033629.6(TREX1)	c.916G>T
48467572	48508971	G>A	p.G306E	Nonsynonymous	c.917G>A	p.G306E	COSM8270643	Substitution - Missense	TREX1_ENST00000625293	ENST00000625293.2	No	TCGA-CX-7085-01	2193569	Upper aerodigestive tract	Head neck	NS	Carcinoma	Squamous cell carcinoma	NS	-	627	Confirmed Somatic	Unknown	Unknown	3:48467572..48467572	1	c.1082G>A	p.G361E	c.887G>A	p.G296E	ENST00000422277.2:c.1082G>A	p.Gly361Glu	p.G361E	1	HNSC	head_and_neck	missense_variant	rs780022923	361	gGa/gAa	1082	CM074610,rs780022923	benign(0.096)	deleterious_low_confidence(0.05)	1743	48508971	48508971
48467572	48508971	G>C	p.G306A	Nonsynonymous																																												NM_033629.6(TREX1)	c.917G>C
48467578	48508977	C>G	p.S308C	Nonsynonymous																																												NM_033629.6(TREX1)	c.923C>G
48467579	48508978	C>A	p.S308S	Synonymous																											ENST00000422277.2:c.1089C>A	p.Ser363=	p.S363=	1	SKCM	melanoma	synonymous_variant	novel	363	tcC/tcA	1089	.	.	.	1750	48508978	48508978
48467580		C>T	p.L309L	Synonymous
48467589	48508988	C>G	p.P312A	Nonsynonymous																																												NM_033629.6(TREX1)	c.934C>G
48467590	48508989	C>G	p.P312R	Nonsynonymous																																												NM_033629.6(TREX1)	c.935C>G
48467590	48508989	C>T	p.P312L	Nonsynonymous	c.935C>T	p.P312L	COSM3594916	Substitution - Missense	TREX1_ENST00000625293	ENST00000625293.2	No	TCGA-FW-A3TU-06	2121784	Skin	NS	NS	Malignant melanoma	NS	NS	-	540	Confirmed Somatic	Unknown	Unknown	3:48467590..48467590	1	c.1100C>T	p.P367L	c.905C>T	p.P302L	ENST00000422277.2:c.1100C>T	p.Pro367Leu	p.P367L	1	SKCM	melanoma	missense_variant	rs772805032	367	cCt/cTt	1100	rs772805032,COSM3594916	possibly_damaging(0.856)	deleterious_low_confidence(0)	1761	48508989	48508989
48467601	48509000	G>T	3_prime_UTR_variant																												ENST00000422277.2:c.*1G>T			1	LUSC	lung_squamous_cell	3_prime_UTR_variant	novel			.	.	.	.	1772	48509000	48509000
48467602		C>T	3_prime_UTR_variant
48467610		dup	3_prime_UTR_variant
48467619		A>G	3_prime_UTR_variant
48467620		C>T	3_prime_UTR_variant
48467621		G>A	3_prime_UTR_variant
48467629		dup	3_prime_UTR_variant
48467634	48509033	C>T	3_prime_UTR_variant																												ENST00000422277.2:c.*34C>T			1	COADREAD	colorectal	3_prime_UTR_variant	rs897187789			.	.	.	.	1805	48509033	48509033
48467634	48509033	del	3_prime_UTR_variant
48467637		T>C	3_prime_UTR_variant
48467638		G>A	3_prime_UTR_variant
48467641		C>T	3_prime_UTR_variant
48467643		A>G	3_prime_UTR_variant
48467644		T>C	3_prime_UTR_variant
[truncated: 117 more columns]
