# Supplementary material for: Prevalence and impact of molecular variation in the three-prime repair exonuclease 1 TREX1 and its implications for oncology
Source: Hum Genomics. 2025 Jun 28;19:73. doi: 10.1186/s40246-025-00785-y (PMC12206365; doi:10.1186/s40246-025-00785-y)
Supplement: Supplementary file 11 — Additional file 11. Table S8. Reported human protein sequence variants in the TREX1b isoform with added data on conservation of each TREX1b position in 159 placental mammalian species. [file 40246_2025_785_MOESM11_ESM.xlsx]

## Sheet: Table_S8
Table S8. Reported human protein sequence variants in the TREX1b isoform with added data on conservation of each TREX1b position in 159 placental mammalian species
For each of the 314 TREX1b protein sequence positions, shown are metrics of mammalian sequence conservation in 159 placental mammals.
For those positions where protein sequence mutations were reported in human databases, information about individual protein sequence variants is provided.
Information about protein sequence variants was integrated from DNA sequence changes if they resulted in the same protein sequence change.
For those columns and amino acid changes where the combined genomic variants had different data, information for individuals genomic variants is separated by a semicolon (;).
Detailed information about each individual genomic variant is provided in Table S6.
Human_AA_change indicates protein sequence changes reported in human datasets.
Species_matching_human_variant provides the list of mammalian placental species whose GenBank RefSeq sequence in that position is identical to the given human protein sequence variant
Allele frequency in gnomAD was labeled as Elevated if database-wide frequency of a given variant allele was > 0.0011, and as Low if it were <= 0.0011.
Trex1b_position	Trex1b_AA	Location_GRCh38	Location_hg19	Genomic_change	Human_AA_change	Protein_Consequence	Placental_conservation	Changed_aa	Placental_consensus_aa	Placental_consensus_support	Placental_quality	Placental_occupancy	Human_same_as_placental_consensus	Species_matching_human_variant	Cosmic-AA Mutation_TREX1b	Cosmic-Legacy_mutation_ID	Cosmic-Type	Cosmic-Gene_name	Cosmic-Transcript	Cosmic-Census_tier	Cosmic-Sample_name	Cosmic-Sample_ID	Cosmic-AA_mutation	Cosmic-Primary_tissue	Cosmic-Tissue_subtype1	Cosmic-Tissue_subtype2	Cosmic-Histology	Cosmic-Histology_subtype1	Cosmic-Histology_subtype2	Cosmic-Pubmed_ID	Cosmic-CGP_study	Cosmic-Somatic_status	Cosmic-Sample_type	Cosmic-Zygosity	Cosmic-Genomic_coordinates	Cosmic-Count	Cosmic-CDS_mutation_TREX1a	Cosmic-AA Mutation_TREX1a	Cosmic-CDS_mutation_TREX1c	Cosmic-AA Mutation_TREX1c	TCGA-HGVSc	TCGA-HGVSp	TCGA-HGVSp_Short	TCGA-Count	TCGA_Study	TCGA-Primary_Tissue	TCGA-Consequence	TCGA-dbSNP_RS	TCGA-Protein_position
1	M	48466657	48508056	T>C	p.M1T	Nonsynonymous	11	T	M	100	377.888	159	Yes
1	M	48466656	48508055	A>G	p.M1V	Nonsynonymous	11	V	M	100	377.888	159	Yes
2	G	48466658	48508057	del	p.G2fs	Frameshift	5		G	85.5346	288.308	159	Yes
2	G	48466659		G>A	p.G2S	Nonsynonymous	5	S	G	85.5346	288.308	159	Yes	Oryctolagus cuniculus
2	G	48466660	48508059	G>T	p.G2V	Nonsynonymous	5	V	G	85.5346	288.308	159	Yes
3	S	48466663	48508062	C>T	p.S3L	Nonsynonymous	10	L	S	96.2264	350.839	158	Yes
4	Q	48466665	48508064	C>T	p.Q4*	Stop_gained	6		Q	83.0189	313.906	158	Yes		p.Q4*	COSM8428039	Substitution - Nonsense	TREX1_ENST00000625293	ENST00000625293.2	No	TCGA-HZ-7289-01	2196538	p.Q4*	Pancreas	NS	NS	Carcinoma	Ductal carcinoma	NS	-	629	Confirmed Somatic	Unknown	Unknown	3:48466665..48466665	1	c.175C>T	p.Q59*			ENST00000422277.2:c.175C>T	p.Gln59Ter	p.Q59*	1	PAAD	pancreas	stop_gained	novel	59
4	Q	48466665	48508064	C>A	p.Q4K	Nonsynonymous	6	K	Q	83.0189	313.906	158	Yes	Grammomys surdaster/Arvicanthis niloticus/Chinchilla lanigera/Trachypithecus francoisi/Echinops telfairi/Galeopterus variegatus
5	A	48466669	48508068	C>A	p.A5D	Nonsynonymous	8	D	A	91.195	346.904	158	Yes
6	L						6		L	60.3774	94.417	158	Yes
7	P	48466672-48466673	48508071-48508072	dup	p.P7fs	Frameshift	4		P	77.3585	267.238	158	Yes
7	P	48466675	48508074	C>G	p.P7R	Nonsynonymous	4	R	P	77.3585	267.238	158	Yes	Dipodomys ordii/Dipodomys spectabilis
7	P	48466674	48508073	C>T	p.P7S	Nonsynonymous	4	S	P	77.3585	267.238	158	Yes	Otolemur garnettii/Chrysochloris asiatica/Orycteropus afer afer/Loxodonta africana/Trichechus manatus latirostris/Tupaia chinensis
8	P	48466677	48508076	C>G	p.P8A	Nonsynonymous	2	A	P	71.0692	184.907	159	Yes
8	P	48466678	48508077	C>T	p.P8L	Nonsynonymous	2	L	P	71.0692	184.907	159	Yes	Hipposideros armiger/Cricetulus griseus/Saimiri boliviensis boliviensis/Oryx dammah/Meles meles/Suricata suricatta/Hyaena hyaena/Echinops telfairi
8	P	48466679;48466679		G>A;G>C	p.P8P	Synonymous	2		P	71.0692	184.907	159	Yes
9	G	48466681	48508080	G>A	p.G9E	Nonsynonymous	4	E	G	90.566	327.865	159	Yes	Ochotona princeps/Ochotona curzoniae/Propithecus coquereli/Otolemur garnettii/Rhinolophus sinicus
9	G	48466682	48508081	G>A	p.G9G	Synonymous	4		G	90.566	327.865	159	Yes
10	P	48466673-48466674	48508072-48508073	dup	p.P10fs	Frameshift	3		P	93.0818	321.159	159	Yes
10	P	48466684	48508083	C>A	p.P10H	Nonsynonymous	3	H	P	93.0818	321.159	159	Yes	Rattus norvegicus/Rattus rattus/Grammomys surdaster/Mus pahari/Mus musculus/Arvicanthis niloticus/Mus caroli/Mastomys coucha/Trichechus manatus latirostris
10	P	48466685		C>T	p.P10P	Synonymous	3		P	93.0818	321.159	159	Yes
10	P	48466683		C>A	p.P10T	Nonsynonymous	3	T	P	93.0818	321.159	159	Yes		p.P10T	COSM9105006	Substitution - Missense	TREX1_ENST00000625293	ENST00000625293.2	No	CHCOSK001	2779625	p.P10T	Biliary tract	Bile duct	NS	Carcinoma	NS	NS	27267998	-	Confirmed Somatic	Tumour Sample	Unknown	3:48466683..48466683	1	c.193C>A	p.P65T
11	M	48466687	48508086	T>G	p.M11R	Nonsynonymous	8	R	M	57.2327	320.164	159	Yes
11	M	48466687	48508086	T>C	p.M11T	Nonsynonymous	8	T	M	57.2327	320.164	159	Yes	Orycteropus afer afer
12	Q	48466690	48508089	A>G	p.Q12R	Nonsynonymous	11	R	Q	100	377.888	159	Yes
13	T	48466693	48508092	C>A	p.T13N	Nonsynonymous	10	N	T	99.3711	376.3	159	Yes
13	T	48466692		A>T	p.T13S	Nonsynonymous	10	S	T	99.3711	376.3	159	Yes
14	L	48466695	48508094	C>T	p.L14F	Nonsynonymous	10	F	L	98.1132	371.628	159	Yes	Otolemur garnettii/Tupaia chinensis
15	I	48466698	48508097-48508099	dup	p.I15dup	Insertion	10		I	97.4843	376.733	159	Yes
15	I	48466700	48508099	C>G	p.I15M	Nonsynonymous	10	M	I	97.4843	376.733	159	Yes
16	F						11		F	100	377.888	159	Yes
17	F	48466706		C>G	p.F17L	Nonsynonymous	8	L	L	83.6478	314.615	159	No	Dipodomys ordii/Dipodomys spectabilis/Ictidomys tridecemlineatus/Marmota flaviventris/Marmota marmota marmota/Marmota monax/Urocitellus parryii/Neosciurus carolinensis/Nannospalax galili/Arvicola amphibius/Microtus oregoni/Microtus ochrogaster/Myodes glareolus/Peromyscus leucopus/Peromyscus maniculatus bairdii/Onychomys torridus/Rattus norvegicus/Rattus rattus/Grammomys surdaster/Mus pahari/Mus m…	p.F17L	COSM9557860	Substitution - Missense	TREX1_ENST00000625293	ENST00000625293.2	No	BRCA-05246_CCPM_0300316-Tumor-SM-AXFHZ;BRCA-05246_CCPM_0300316-Tumor-SM-AFDG4	2857595,2857596	p.F17L	Breast	NS	NS	Carcinoma	ER-PR-positive carcinoma	NS	30531871	-	Confirmed Somatic	Tumour Sample	Unknown	3:48466706..48466706	2	c.216C>G	p.F72L	c.21C>G	p.F7L
17	F	48466705		T>C	p.F17S	Nonsynonymous	8	S	L	83.6478	314.615	159	No
18	D	48466707	48508106	G>A	p.D18N	Nonsynonymous	11	N	D	100	377.888	159	Yes
19	M	48466710	48508109	A>C	p.M19L	Nonsynonymous	9	L	L	84.9057	365.15	159	No	Dipodomys ordii/Dipodomys spectabilis/Perognathus longimembris pacificus/Ictidomys tridecemlineatus/Marmota flaviventris/Marmota marmota marmota/Marmota monax/Urocitellus parryii/Neosciurus carolinensis/Nannospalax galili/Arvicola amphibius/Microtus oregoni/Microtus ochrogaster/Myodes glareolus/Peromyscus leucopus/Peromyscus maniculatus bairdii/Onychomys torridus/Rattus norvegicus/Rattus rattus/G…
19	M	48466710	48508109	A>G	p.M19V	Nonsynonymous	9	V	L	84.9057	365.15	159	No
20	E	48466711-48466712	48508110-48508111	dup	p.E20fs	Frameshift	11		E	100	377.888	159	Yes
20	E	48466711;48466713	;48508112	dup;dup	p.E20Gfs*82	Frameshift+Stop_gained	11		E	100	377.888	159	Yes
21	A	48466716	48508115	G>A	p.A21T	Nonsynonymous	11	T	A	100	377.888	159	Yes
22	T						11		T	100	377.888	159	Yes
23	G	48466723	48508122	G>A	p.G23D	Nonsynonymous	11	D	G	100	377.888	159	Yes		p.G23D	COSM8227842	Substitution - Missense	TREX1_ENST00000625293	ENST00000625293.2	No	TCGA-SW-A7EA-01	2339963	p.G23D	Stomach	NS	NS	Carcinoma	Adenocarcinoma	NS	-	541	Confirmed Somatic	Tumour Sample	Unknown	3:48466723..48466723	1	c.233G>A	p.G78D	c.38G>A	p.G13D	ENST00000422277.2:c.233G>A	p.Gly78Asp	p.G78D	1	STAD	stomach	missense_variant	novel	78
23	G	48466724		C>T	p.G23G	Synonymous	11		G	100	377.888	159	Yes
23	G	48466722	48508121	G>A	p.G23S	Nonsynonymous	11	S	G	100	377.888	159	Yes																												ENST00000422277.2:c.232G>A	p.Gly78Ser	p.G78S	1	TGCT	testicular	missense_variant	novel	78
23	G	48466723		G>T	p.G23V	Nonsynonymous	11	V	G	100	377.888	159	Yes		p.G23V	COSM6807711	Substitution - Missense	TREX1_ENST00000625293	ENST00000625293.2	No	T593	2658231	p.G23V	Large intestine	NS	NS	Carcinoma	Adenocarcinoma	NS	27149842	-	Confirmed Somatic	Unknown	Unknown	3:48466723..48466723	1	c.233G>T	p.G78V	c.38G>T	p.G13V
24	L						11		L	100	377.888	159	Yes
25	P	48466729	48508128	C>T	p.P25L	Nonsynonymous	11	L	P	100	377.888	159	Yes		p.P25L	COSM1692736	Substitution - Missense	TREX1_ENST00000625293	ENST00000625293.2	No	YUPAT	2013666	p.P25L	Skin	NS	NS	Malignant melanoma	NS	NS	22842228	-	Confirmed Somatic	Unknown	Heterozygous	3:48466729..48466729	1	c.239C>T	p.P80L	c.44C>T	p.P15L
25	P	48466728	48508127	C>A	p.P25T	Nonsynonymous	11	T	P	100	377.888	159	Yes
26	F	48466732-48466733		delinsCG	p.F26S	Nonsynonymous	4	S	F	71.0692	190.809	159	Yes	Mus musculus/Vulpes lagopus/Vulpes vulpes/Neogale vison/Canis lupus familiaris/Eumetopias jubatus/Zalophus californianus/Callorhinus ursinus/Odobenus rosmarus divergens/Halichoerus grypus/Mirounga leonina/Neomonachus schauinslandi/Leptonychotes weddellii/Phoca vitulina/Mustela erminea/Mustela putorius furo/Enhydra lutris kenyoni/Lutra lutra/Lontra canadensis/Meles meles/Ursus maritimus/Ailuropoda…	p.F26S	COSM9812688	Substitution - Missense	TREX1_ENST00000625293	ENST00000625293.2	No	DD107_Org	2749229	p.F26S	Stomach	NS	NS	Carcinoma	Adenocarcinoma	NS	29703791	-	Confirmed Somatic	Cultured	Heterozygous	3:48466732..48466733	1	c.242_243delinsCG	p.F81S	c.47_48delinsCG	p.F16S
27	S	48466735	48508134	C>T	p.S27F	Nonsynonymous	10	F	S	99.3711	376.426	159	Yes
28	Q	48466738	48508137	A>G	p.Q28R	Nonsynonymous	8	R	Q	91.8239	357.964	159	Yes	Mus musculus/Mus caroli/Panthera tigris/Panthera leo/Panthera pardus/Felis catus/Puma concolor/Lynx canadensis/Prionailurus viverrinus/Leopardus geoffroyi/Suricata suricatta/Hyaena hyaena	p.Q28R	COSM9812689	Substitution - Missense	TREX1_ENST00000625293	ENST00000625293.2	No	DD107_Org	2749229	p.Q28R	Stomach	NS	NS	Carcinoma	Adenocarcinoma	NS	29703791	-	Confirmed Somatic	Cultured	Heterozygous	3:48466738..48466738	1	c.248A>G	p.Q83R	c.53A>G	p.Q18R
29	P	48466740	48508139	C>T	p.P29S	Nonsynonymous	11	S	P	100	377.888	159	Yes		p.P29S	COSM7168954	Substitution - Missense	TREX1_ENST00000625293	ENST00000625293.2	No	TCGA-YC-A89H-01	2339203	p.P29S	Urinary tract	Bladder	NS	Carcinoma	NS	NS	-	413	Confirmed Somatic	Tumour Sample	Unknown	3:48466740..48466740	1	c.250C>T	p.P84S	c.55C>T	p.P19S	ENST00000422277.2:c.250C>T	p.Pro84Ser	p.P84S	1	BLCA	bladder	missense_variant	rs1407557314	84
30	K	48466743	48508142	A>G	p.K30E	Nonsynonymous	10	E	K	96.8554	373.161	159	Yes	Mus musculus	p.K30E	COSM9812690	Substitution - Missense	TREX1_ENST00000625293	ENST00000625293.2	No	DD107_Org	2749229	p.K30E	Stomach	NS	NS	Carcinoma	Adenocarcinoma	NS	29703791	-	Confirmed Somatic	Cultured	Heterozygous	3:48466743..48466743	1	c.253A>G	p.K85E	c.58A>G	p.K20E
31	V	48466746	48508145	G>A	p.V31I	Nonsynonymous	9	I	V	70.4403	366.971	159	Yes	Dipodomys ordii/Dipodomys spectabilis/Perognathus longimembris pacificus/Onychomys torridus/Rattus norvegicus/Rattus rattus/Heterocephalus glaber/Rousettus aegyptiacus/Oryctolagus cuniculus/Hipposideros armiger/Cricetulus griseus/Meriones unguiculatus/Mesocricetus auratus/Fukomys damarensis/Odocoileus virginianus texanus/Cervus elaphus/Cervus canadensis/Ochotona princeps/Ochotona curzoniae/Bos ta…
32	T	48466750	48508149	C>T	p.T32M	Nonsynonymous	11	M	T	100	377.888	159	Yes
32	T	48466750	48508149	C>G	p.T32R	Nonsynonymous	11	R	T	100	377.888	159	Yes
32	T	48466751		G>A	p.T32T	Synonymous	11		T	100	377.888	159	Yes
33	E	48466753	48508152	A>T	p.E33V	Nonsynonymous	11	V	E	100	377.888	159	Yes
34	L	48466755;48466757		C>T;G>A	p.L34L	Synonymous	11		L	100	377.888	159	Yes
35	C						11		C	100	377.888	159	Yes
36	L						9		L	96.8554	375	159	Yes
37	L						10		L	98.1132	375.881	159	Yes
38	A	48466767	48508166	G>T	p.A38S	Nonsynonymous	11	S	A	100	377.888	159	Yes
38	A	48466768	48508167	C>T	p.A38V	Nonsynonymous	11	V	A	100	377.888	159	Yes
39	V	48466770		G>C	p.V39L	Nonsynonymous	9	L	V	81.761	369.945	159	Yes
40	H						10		H	98.7421	367.451	159	Yes
41	R						11		R	100	377.888	159	Yes
42	C	48466776-48466777	48508175-48508176	dup	p.C42*	Stop_gained	5		C	71.6981	99.5648	159	Yes
42	C	48466779		T>C	p.C42R	Nonsynonymous	5	R	C	71.6981	99.5648	159	Yes	Dipodomys ordii/Dipodomys spectabilis/Perognathus longimembris pacificus/Mus musculus	p.C42R	COSM9812691	Substitution - Missense	TREX1_ENST00000625293	ENST00000625293.2	No	DD107_Org;DD191_Org	27492292749233	p.C42R	Stomach	NS,Gastroesophageal junction	NS	Carcinoma	Adenocarcinoma	NS	29703791	-	Confirmed Somatic	Cultured	Heterozygous	3:48466779..48466779	2	c.289T>C	p.C97R	c.94T>C	p.C32R
42	C	48466781	48508180	T>G	p.C42W	Nonsynonymous	5	W	C	71.6981	99.5648	159	Yes	Nannospalax galili/Lipotes vexillifer/Balaenoptera acutorostrata scammoni/Balaenoptera musculus/Orcinus orca/Lagenorhynchus obliquidens/Tursiops truncatus/Delphinapterus leucas/Neophocaena asiaeorientalis asiaeorientalis
42	C	48466780	48508179	G>A	p.C42Y	Nonsynonymous	5	Y	C	71.6981	99.5648	159	Yes	Arvicola amphibius/Microtus oregoni/Microtus ochrogaster/Myodes glareolus/Peromyscus maniculatus bairdii/Onychomys torridus/Jaculus jaculus/Meriones unguiculatus/Odocoileus virginianus texanus/Bos taurus/Bison bison bison/Bos mutus/Bos indicus/Bubalus bubalis/Capra hircus/Oryx dammah/Ovis aries/Enhydra lutris kenyoni/Lutra lutra/Lontra canadensis
43	A	48466782	48508181	G>T	p.A43S	Nonsynonymous	10	S	A	97.4843	369.497	159	Yes
43	A	48466782	48508181	G>A	p.A43T	Nonsynonymous	10	T	A	97.4843	369.497	159	Yes	Choloepus didactylus/Chrysochloris asiatica
44	L	48466786	48508185	T>C	p.L44P	Nonsynonymous	10	P	L	99.3711	377.301	159	Yes		p.L44P	COSM4920953	Substitution - Missense	TREX1_ENST00000625293	ENST00000625293.2	No	TCGA-DD-A4NJ-01	2194542	p.L44P	Liver	NS	NS	Carcinoma	Hepatocellular carcinoma	NS	-	628	Confirmed Somatic	Unknown	Unknown	3:48466786..48466786	1	c.296T>C	p.L99P	c.101T>C	p.L34P	ENST00000422277.2:c.296T>C	p.Leu99Pro	p.L99P	2	LIHC, LIHC	liver, liver	missense_variant	novel	99
45	E	48466787-48466789		delinsAAG	p.E45R	Nonsynonymous	10	R	E	99.3711	373.085	159	Yes		p.E45R	COSM9430534	Substitution - Missense	TREX1_ENST00000625293	ENST00000625293.2	No	EXTERN_MELA_20140924_013	2839373	p.E45R	Skin	Face	NS	Malignant melanoma	NS	NS	28467829	-	Confirmed Somatic	Tumour Sample	Unknown	3:48466787..48466789	1	c.297_299delinsAAG	p.E100R	c.102_104delinsAAG	p.E35R
46	S	48466791-48466792	48508190-48508191	dup	p.S46fs	Frameshift	4		S	61.6352	258.26	159	Yes
46	S	48466792		G>A	p.S46N	Nonsynonymous	4	N	S	61.6352	258.26	159	Yes	Ictidomys tridecemlineatus/Marmota flaviventris/Marmota marmota marmota/Marmota monax/Urocitellus parryii/Nannospalax galili/Arvicola amphibius/Microtus oregoni/Microtus ochrogaster/Myodes glareolus/Peromyscus leucopus/Peromyscus maniculatus bairdii/Onychomys torridus/Rattus norvegicus/Rattus rattus/Grammomys surdaster/Mus pahari/Mus musculus/Jaculus jaculus/Heterocephalus glaber/Cricetulus grise…	p.S46N	COSM9823492	Substitution - Missense	TREX1_ENST00000625293	ENST00000625293.2	No	DD191_Org	2749233	p.S46N	Stomach	Gastroesophageal junction	NS	Carcinoma	Adenocarcinoma	NS	29703791	-	Confirmed Somatic	Cultured	Heterozygous	3:48466792..48466792	1	c.302G>A	p.S101N	c.107G>A	p.S36N
46	S	48466793		C>T	p.S46S	Synonymous	4		S	61.6352	258.26	159	Yes
47	P	48466795		C>A	p.P47H	Nonsynonymous	4	H	P	40.2516	125.863	159	Yes
47	P	48466796	48508195	C>T	p.P47P	Synonymous	4		P	40.2516	125.863	159	Yes																												ENST00000422277.2:c.306C>T	p.Pro102=	p.P102=	1	UCEC	endometrial	synonymous_variant	novel	102
47	P	48466794	48508193	C>A	p.P47T	Nonsynonymous	4	T	P	40.2516	125.863	159	Yes	Dipodomys ordii/Dipodomys spectabilis/Ictidomys tridecemlineatus/Marmota flaviventris/Marmota marmota marmota/Marmota monax/Urocitellus parryii/Neosciurus carolinensis/Nannospalax galili/Arvicola amphibius/Microtus oregoni/Microtus ochrogaster/Myodes glareolus/Peromyscus leucopus/Peromyscus maniculatus bairdii/Onychomys torridus/Mus musculus/Jaculus jaculus/Castor canadensis/Cricetulus griseus/Me…	p.P47T	COSM9823493	Substitution - Missense	TREX1_ENST00000625293	ENST00000625293.2	No	DD191_Org	2749233	p.P47T	Stomach	Gastroesophageal junction	NS	Carcinoma	Adenocarcinoma	NS	29703791	-	Confirmed Somatic	Cultured	Heterozygous	3:48466794..48466794	1	c.304C>A	p.P102T	c.109C>A	p.P37T
48	P	48466793-48466795	48508192-48508194	del	p.P48del	Deletion	4		P	68.5535	241.122	159	Yes
48	P	48466793-48466794	48508192-48508193	del	p.P48fs	Frameshift	4		P	68.5535	241.122	159	Yes
48	P	48466798	48508197	C>T	p.P48L	Nonsynonymous	4	L	P	68.5535	241.122	159	Yes	Ictidomys tridecemlineatus/Marmota flaviventris/Marmota marmota marmota/Marmota monax/Urocitellus parryii/Neosciurus carolinensis/Neomonachus schauinslandi/Chrysochloris asiatica
48	P	48466799;48466799	;48508198	C>A;C>G	p.P48P	Synonymous	4		P	68.5535	241.122	159	Yes
48	P	48466796-48466797;48466797	;48508196	delinsTT;C>T	p.P48S	Nonsynonymous	4	S	P	68.5535	241.122	159	Yes	Nannospalax galili/Arvicola amphibius/Microtus oregoni/Microtus ochrogaster/Myodes glareolus/Peromyscus leucopus/Peromyscus maniculatus bairdii/Onychomys torridus/Rattus norvegicus/Rattus rattus/Grammomys surdaster/Mus pahari/Mus musculus/Heterocephalus glaber/Octodon degus/Cavia porcellus/Castor canadensis/Cricetulus griseus/Meriones unguiculatus/Mesocricetus auratus/Arvicanthis niloticus/Mus ca…	p.P48S	COSM9823494;COSM7482364	Substitution - Missense	TREX1_ENST00000625293	ENST00000625293.2	No	DD191_Org;TCGA-14-0866-01	2749233;2178121	p.P48S	Stomach;Central nervous system	Gastroesophageal junction;Brain	NS	Carcinoma;Glioma	Adenocarcinoma;Astrocytoma Grade IV	NS;Glioblastoma multiforme	29703791;-	-;329	Confirmed Somatic	Cultured;Unknown	Heterozygous;Unknown	3:48466796..48466797;3:48466797..48466797	1	c.306_307delinsTT;c.307C>T	p.P103S	c.111_112delinsTT;c.112C>T	p.P38S	;ENST00000422277.2:c.307C>T	;p.Pro103Ser	;p.P103S	;1	;GBM	;glioblastoma	;missense_variant	;rs754776272	;103
49	T	48466800	48508199	A>G	p.T49A	Nonsynonymous	4	A	T	52.8302	179.882	159	Yes	Odocoileus virginianus texanus/Cervus elaphus/Cervus canadensis/Bos taurus/Bison bison bison/Bos mutus/Bos indicus/Bubalus bubalis/Desmodus rotundus/Phyllostomus discolor/Myotis davidii/Eptesicus fuscus/Pipistrellus kuhlii/Orycteropus afer afer/Echinops telfairi
49	T	48466793	48508192	del	p.T49fs	Frameshift	4		T	52.8302	179.882	159	Yes																												ENST00000422277.2:c.309del	p.Thr104ProfsTer16	p.T104Pfs*16	1	STAD	stomach	frameshift_variant	rs748914604	101
49	T	48466792-48466793	48508191-48508192	dup	p.T49fs	Frameshift	4		T	52.8302	179.882	159	Yes
49	T	48466799	48508198	dup	p.T49Hfs*53	Frameshift+Stop_gained	4		T	52.8302	179.882	159	Yes
49	T	48466792;48466799-48466800	48508191;	dup;dup	p.T49Hfs*53	Frameshift+Stop_gained	4		T	52.8302	179.882	159	Yes		;p.T49Hfs*53	;COSM4612154	;Insertion - Frameshift	;TREX1_ENST00000625293	;ENST00000625293.2	;No	;T111; TCGA-CG-4442-01; HCA7; CC-UT-167T; T1849	;2658341, 2198151, 2301976, 2856950, 2658271	;p.T49Hfs*53	;Large intestine, Stomach, Kidney	;NS, Colon	;NS, Right	;Carcinoma	;Adenocarcinoma, Clear cell renal cell carcinoma	;NS	;27149842, -, 24755471, 32271170	;-, 541	;Confirmed Somatic, Previously Reported	;Unknown, Cultured, Tumour Sample	;Unknown, Heterozygous	;3:48466799..48466800	;5	;c.309dup	;p.T104Hfs*53	;c.114dup	;p.T39Hfs*53	ENST00000422277.2:c.309dup;	p.Thr104HisfsTer53;	p.T104Hfs*53;	1;	STAD;	stomach;	frameshift_variant;	rs748914604;	101;
49	T	48466801-48466802		delinsTT	p.T49I	Nonsynonymous	4	I	T	52.8302	179.882	159	Yes	Nannospalax galili/Arvicola amphibius/Microtus oregoni/Microtus ochrogaster/Myodes glareolus/Peromyscus leucopus/Peromyscus maniculatus bairdii/Onychomys torridus/Grammomys surdaster/Mus pahari/Mus musculus/Jaculus jaculus/Cricetulus griseus/Meriones unguiculatus/Mesocricetus auratus/Arvicanthis niloticus/Mus caroli/Pongo abelii/Phacochoerus africanus/Sus scrofa	p.T49I	COSM9823495	Substitution - Missense	TREX1_ENST00000625293	ENST00000625293.2	No	DD191_Org	2749233	p.T49I	Stomach	Gastroesophageal junction	NS	Carcinoma	Adenocarcinoma	NS	29703791	-	Confirmed Somatic	Cultured	Heterozygous	3:48466801..48466802	1	c.311_312delinsTT	p.T104I	c.116_117delinsTT	p.T39I
49	T	48466800	48508199	A>C	p.T49P	Nonsynonymous	4	P	T	52.8302	179.882	159	Yes	Perognathus longimembris pacificus/Octodon degus/Cavia porcellus/Oryctolagus cuniculus/Chinchilla lanigera/Neogale vison/Mustela erminea/Mustela putorius furo/Enhydra lutris kenyoni/Lutra lutra/Lontra canadensis/Meles meles
49	T	48466799;48466799	;48508198	del;del	p.T49Pfs*16	Frameshift+Stop_gained	4		T	52.8302	179.882	159	Yes		p.T49Pfs*16;	COSM4613605;	Deletion - Frameshift;	TREX1_ENST00000625293;	ENST00000625293.2;	No;	LIM2405;T207430;T242594;T390;155;	2301994, 2658236, 2658263, 2658301, 2748127;	p.T49Pfs*16;	Large intestine,Stomach;	Colon,NS;	Right,NS;	Carcinoma;	Adenocarcinoma,NS;	NS;	24755471,27149842,-;	-,683;	Previously Reported,Confirmed Somatic;	Cultured,Unknown,Tumour Sample;	Heterozygous,Unknown;	3:48466799..48466799;	5;	c.309del;	p.T104Pfs*16;	c.114del;	p.T39Pfs*16;
50	S	48466804		C>T	p.S50F	Nonsynonymous	4	F	PS	40.2516	142.667	159	No		p.S50F	COSM7341810	Substitution - Missense	TREX1_ENST00000625293	ENST00000625293.2	No	20	2766258	p.S50F	Salivary gland	Parotid	NS	Carcinoma	Mucoepidermoid carcinoma	NS	27340278	-	Confirmed Somatic	Tumour Sample	Unknown	3:48466804..48466804	1	c.314C>T	p.S105F	c.119C>T	p.S40F
51	Q	48466806		C>T	p.Q51*	Stop_gained	3		Q	76.7296	270.18	159	Yes		p.Q51*	COSM3070388	Substitution - Nonsense	TREX1_ENST00000625293	ENST00000625293.2	No	2857095; H1869	2857095, 2776250	p.Q51*	Urinary tract, Lung	Bladder, NS	NS	Carcinoma	Transitional cell carcinoma, Squamous cell carcinoma	NS	25096233, 29681454	-	Confirmed Somatic, Previously Reported	Tumour Sample, Unknown	Unknown	3:48466806..48466806	2	c.316C>T	p.Q106*	c.121C>T	p.Q41*
51	Q	48466802-48466803;48466806-48466819;48466807-48466808	48508201-48508202;48508205-48508218;48508206-48508207	del;del;del	p.Q51fs	Frameshift	3		Q	76.7296	270.18	159	Yes
51	Q	48466801;48466805-48466806	;48508204-48508205	del;del	p.Q51Gfs*50	Frameshift+Stop_gained	3		Q	76.7296	270.18	159	Yes
51	Q	48466807	48508206	A>C	p.Q51P	Nonsynonymous	3	P	Q	76.7296	270.18	159	Yes	Tupaia chinensis
51	Q	48466807	48508206	A>G	p.Q51R	Nonsynonymous	3	R	Q	76.7296	270.18	159	Yes	Dipodomys ordii/Dipodomys spectabilis/Onychomys torridus/Meriones unguiculatus/Sturnira hondurensis/Artibeus jamaicensis/Desmodus rotundus/Phyllostomus discolor/Enhydra lutris kenyoni/Lutra lutra
52	G	48466809		G>T	p.G52W	Nonsynonymous	4	W	G	93.0818	342.138	159	Yes
53	P	48466813-48466814		delinsAT	p.P53H	Nonsynonymous	0	H	P	52.8302	157.117	147	Yes	Mus musculus/Jaculus jaculus/Castor canadensis	p.P53H	COSM9823496	Substitution - Missense	TREX1_ENST00000625293	ENST00000625293.2	No	DD191_Org	2749233	p.P53H	Stomach	Gastroesophageal junction	NS	Carcinoma	Adenocarcinoma	NS	29703791	-	Confirmed Somatic	Cultured	Heterozygous	3:48466813..48466814	1	c.323_324delinsAT	p.P108H	c.128_129delinsAT	p.P43H
54	P	48466816		C>A	p.P54H	Nonsynonymous	1	H	P	77.9874	246.952	152	Yes	Vulpes vulpes	p.P54H	COSM4735870	Substitution - Missense	TREX1_ENST00000625293	ENST00000625293.2	No	T3202	2658288, 2296197	p.P54H	Large intestine	NS, Caecum	NS	Carcinoma	Adenocarcinoma	NS	27149842, 25344691	-	Confirmed Somatic	Unknown	Unknown	3:48466816..48466816	2	c.326C>A	p.P109H	c.131C>A	p.P44H
55	P						1		P	81.761	264.764	152	Yes
56	T	48466823		A>T	p.T56T	Synonymous	0		T	66.6667	209.193	152	Yes
57	V						8		V	86.7925	322.279	159	Yes
58	P	48466826		del	p.P58Hfs*6	Frameshift+Stop_gained	11		P	100	377.888	159	Yes
58	P	48466828	48508227	C>T	p.P58L	Nonsynonymous	11	L	P	100	377.888	159	Yes
58	P	48466827	48508226	C>T	p.P58S	Nonsynonymous	11	S	P	100	377.888	159	Yes
59	P	48466832		A>G	p.P59P	Synonymous	2		P	65.4088	181.651	159	Yes
60	P						6		P	93.0818	310.695	159	Yes
61	P	48466837	48508236	C>T	p.P61L	Nonsynonymous	11	L	P	100	377.888	159	Yes
61	P	48466838	48508237	G>A	p.P61P	Synonymous	11		P	100	377.888	159	Yes
61	P	48466837	48508236	C>A	p.P61Q	Nonsynonymous	11	Q	P	100	377.888	159	Yes
61	P	48466837	48508236	C>G	p.P61R	Nonsynonymous	11	R	P	100	377.888	159	Yes
62	R	48466839	48508238	C>T	p.R62C	Nonsynonymous	11	C	R	100	377.888	159	Yes
62	R	48466839	48508238	C>G	p.R62G	Nonsynonymous	11	G	R	100	377.888	159	Yes
62	R	48466840	48508239	G>A	p.R62H	Nonsynonymous	11	H	R	100	377.888	159	Yes
62	R	48466840	48508239	G>T	p.R62L	Nonsynonymous	11	L	R	100	377.888	159	Yes
62	R	48466840		G>C	p.R62P	Nonsynonymous	11	P	R	100	377.888	159	Yes
63	V	48466842	48508241	G>A	p.V63M	Nonsynonymous	10	M	V	99.3711	377.548	159	Yes
64	V	48466846	48508245	T>C	p.V64A	Nonsynonymous	7	A	V	68.5535	318.514	159	Yes	Ictidomys tridecemlineatus/Marmota flaviventris/Marmota marmota marmota/Marmota monax/Urocitellus parryii/Neosciurus carolinensis/Grammomys surdaster/Eumetopias jubatus/Zalophus californianus/Callorhinus ursinus/Odobenus rosmarus divergens/Halichoerus grypus/Mirounga leonina/Neomonachus schauinslandi/Leptonychotes weddellii/Phoca vitulina
65	D	48466848-48466850	48508247-48508249	dup	p.D65dup	Insertion	11		D	100	377.888	159	Yes
66	K	48466851		A>T	p.K66*	Stop_gained	11		K	100	377.888	159	Yes		p.K66*	COSM140907	Substitution - Nonsense	TREX1_ENST00000625293	ENST00000625293.2	No	cSCCP8	1604874	p.K66*	Skin	Ear	NS	Carcinoma	Squamous cell carcinoma	NS	21984974	-	Confirmed Somatic	Tumour Sample	Unknown	3:48466851..48466851	1	c.361A>T	p.K121*	c.166A>T	p.K56*
66	K	48466853	48508252	G>A	p.K66K	Synonymous	11		K	100	377.888	159	Yes
66	K	48466852		A>T	p.K66M	Nonsynonymous	11	M	K	100	377.888	159	Yes		p.K66M	COSM140908	Substitution - Missense	TREX1_ENST00000625293	ENST00000625293.2	No	cSCCP8	1604874	p.K66M	Skin	Ear	NS	Carcinoma	Squamous cell carcinoma	NS	21984974	-	Confirmed Somatic	Tumour Sample	Unknown	3:48466852..48466852	1	c.362A>T	p.K121M	c.167A>T	p.K56M
66	K	48466852	48508251	A>G	p.K66R	Nonsynonymous	11	R	K	100	377.888	159	Yes
67	L						11		L	100	377.888	159	Yes
68	S	48466857	48508256	T>G	p.S68A	Nonsynonymous	11	A	S	100	377.888	159	Yes		p.S68A	COSM7106482	Substitution - Missense	TREX1_ENST00000625293	ENST00000625293.2	No	TCGA-E7-A6MD-01	2385757	p.S68A	Urinary tract	Bladder	NS	Carcinoma	NS	NS	-	413	Confirmed Somatic	Tumour Sample	Unknown	3:48466857..48466857	1	c.367T>G	p.S123A	c.172T>G	p.S58A	ENST00000422277.2:c.367T>G	p.Ser123Ala	p.S123A	1	BLCA	bladder	missense_variant	novel	123
69	L	48466862		G>A	p.L69L	Synonymous	10		L	98.7421	376.22	159	Yes
69	L	48466861	48508260	T>C	pL69P	Nonsynonymous	10	P	L	98.7421	376.22	159	Yes
70	C	48466863		T>C	p.C70R	Nonsynonymous	11	R	C	100	377.888	159	Yes
70	C	48466864	48508263	G>C	p.C70S	Nonsynonymous	11	S	C	100	377.888	159	Yes
71	V	48466867	48508266	T>C	p.V71A	Nonsynonymous	9	A	V	87.4214	371.385	159	Yes
71	V	48466861-48466862	48508260-48508261	del	p.V71fs	Frameshift	9		V	87.4214	371.385	159	Yes
71	V	48466861	48508260	del	p.V71Gfs*30	Frameshift+Stop_gained	9		V	87.4214	371.385	159	Yes																												ENST00000422277.2:c.377_378del	p.Val126GlyfsTer30	p.V126Gfs*30	1	LGG	low_grade_glioma	frameshift_variant	rs74689946	124
71	V	48466865-48466866		inv	p.V71M	Nonsynonymous	9	M	V	87.4214	371.385	159	Yes		p.V71M	COSM9823497	Substitution - Missense	TREX1_ENST00000625293	ENST00000625293.2	No	DD191_Org	2749233	p.V71M	Stomach	Gastroesophageal junction	NS	Carcinoma	Adenocarcinoma	NS	29703791	-	Confirmed Somatic	Cultured	Heterozygous	3:48466865..48466866	1	c.375_376inv	p.V126M	c.180_181inv	p.V61M
72	A	48466860-48466861	48508259-48508260	dup	p.A72fs	Frameshift	10		A	98.1132	369.735	159	Yes
72	A	48466867-48466868	48508266-48508267	dup	p.A72Wfs*17	Frameshift+Stop_gained	10		A	98.1132	369.735	159	Yes
73	P	48466873	48508272	C>T	p.P73L	Nonsynonymous	11	L	P	100	377.888	159	Yes
73	P	48466874		G>A	p.P73P	Synonymous	11		P	100	377.888	159	Yes
74	G	48466877		G>A	p.G74G	Synonymous	10		G	98.7421	370.619	159	Yes
75	K	48466879	48508278	A>G	p.K75R	Nonsynonymous	11	R	K	100	377.888	159	Yes
76	A	48466881	48508280	G>T	p.A76S	Nonsynonymous	6	S	A	89.3082	330.042	159	Yes
77	C	48466883		dup	p.C77Lfs*25	Frameshift+Stop_gained	11		C	100	377.888	159	Yes
77	C	48466884	48508283	T>C	p.C77R	Nonsynonymous	11	R	C	100	377.888	159	Yes
78	S	48466888		G>T	p.S78I	Nonsynonymous	9	I	S	96.2264	365.491	159	Yes		p.S78I	COSM4735871	Substitution - Missense	TREX1_ENST00000625293	ENST00000625293.2	No	T407	2658314, 2296247	p.S78I	Large intestine	NS, Colon	NS, Transverse	Carcinoma	Adenocarcinoma	NS	27149842, 25344691	-	Confirmed Somatic	Unknown	Unknown	3:48466888..48466888	2	c.398G>T	p.S133I	c.203G>T	p.S68I
79	P	48466882-48466889	48508281-48508288	del	p.P79fs	Frameshift	7		P	92.4528	348.793	159	Yes
79	P	48466891		C>T	p.P79L	Nonsynonymous	7	L	P	92.4528	348.793	159	Yes
80	A	48466894-48466895		delinsGG	p.A80G	Nonsynonymous	4	G	A	69.1824	219.877	159	Yes	Dipodomys ordii/Dipodomys spectabilis/Rattus norvegicus/Rattus rattus/Mus pahari/Mus musculus/Arvicanthis niloticus/Mus caroli/Mastomys coucha/Enhydra lutris kenyoni/Elephantulus edwardii	p.A80G	COSM9823498	Substitution - Missense	TREX1_ENST00000625293	ENST00000625293.2	No	DD191_Org	2749233	p.A80G	Stomach	Gastroesophageal junction	NS	Carcinoma	Adenocarcinoma	NS	29703791	-	Confirmed Somatic	Cultured	Heterozygous	3:48466894..48466895	1	c.404_405delinsGG	p.A135G	c.209_210delinsGG	p.A70G
81	A	48466895	48508294	dup	p.A81Sfs*21	Frameshift+Stop_gained	11		A	100	377.888	159	Yes
81	A	48466896		G>A	p.A81T	Nonsynonymous	11	T	A	100	377.888	159	Yes
81	A	48466897	48508296	C>T	p.A81V	Nonsynonymous	11	V	A	100	377.888	159	Yes
82	S	48466881-48466882	48508280-48508281	dup	p.S82fs	Frameshift	5		S	95.5975	340.329	159	Yes
82	S	48466894-48466897	48508293-48508296	del	p.S82fs	Frameshift	5		S	95.5975	340.329	159	Yes
82	S	48466881;48466891-48466898	;48508290-48508297	dup;dup	p.S82Lfs*9	Frameshift+Stop_gained	5		S	95.5975	340.329	159	Yes
82	S	48466901	48508300	C>A	p.S82R	Nonsynonymous	5	R	S	95.5975	340.329	159	Yes
82	S	48466901		C>T	p.S82S	Synonymous	5		S	95.5975	340.329	159	Yes
82	S	48466900		G>C	p.S82T	Nonsynonymous	5	T	S	95.5975	340.329	159	Yes	Mus caroli
83	E	48466903		A>G	p.E83G	Nonsynonymous	6	G	E	63.522	289.667	159	Yes	Propithecus coquereli
83	E	48466902	48508301	G>A	p.E83K	Nonsynonymous	6	K	E	63.522	289.667	159	Yes	Grammomys surdaster/Heterocephalus glaber/Octodon degus/Cavia porcellus/Oryctolagus cuniculus/Vulpes lagopus/Chinchilla lanigera/Fukomys damarensis/Vulpes vulpes/Carlito syrichta/Neogale vison/Ochotona princeps/Ochotona curzoniae/Colobus angolensis palliatus/Canis lupus familiaris/Eumetopias jubatus/Zalophus californianus/Callorhinus ursinus/Odobenus rosmarus divergens/Halichoerus grypus/Mirounga…
83	E	48466902		G>C	p.E83Q	Nonsynonymous	6	Q	E	63.522	289.667	159	Yes	Manis pentadactyla/Manis javanica
84	I	48466905		A>C	p.I84L	Nonsynonymous	10	L	I	98.7421	376.771	159	Yes	Manis pentadactyla/Manis javanica
84	I	48466906	48508305	T>G	p.I84S	Nonsynonymous	10	S	I	98.7421	376.771	159	Yes
84	I	48466906	48508305	T>C	p.I84T	Nonsynonymous	10	T	I	98.7421	376.771	159	Yes
84	I	48466905	48508304	A>G	p.I84V	Nonsynonymous	10	V	I	98.7421	376.771	159	Yes
85	T						11		T	100	377.888	159	Yes
86	G	48466911		G>A	p.G86S	Nonsynonymous	11	S	G	100	377.888	159	Yes
87	L	48466916	48508315	G>C	p.L87L	Synonymous	11		L	100	377.888	159	Yes																												ENST00000422277.2:c.426G>C	p.Leu142=	p.L142=	1	BLCA	bladder	synonymous_variant	.	142
87	L	48466915	48508314	T>C	p.L87P	Nonsynonymous	11	P	L	100	377.888	159	Yes																												ENST00000422277.2:c.425T>C	p.Leu142Pro	p.L142P	1	TGCT	testicular	missense_variant	novel	142
88	S	48466918	48508317	G>T	p.S88I	Nonsynonymous	9	I	S	91.8239	354.199	159	Yes
89	T	48466921		C>T	p.T89I	Nonsynonymous	10	I	T	96.8554	361.939	158	Yes
89	T	48466921		C>A	p.T89K	Nonsynonymous	10	K	T	96.8554	361.939	158	Yes	Mus musculus	p.T89K	COSM9812692	Substitution - Missense	TREX1_ENST00000625293	ENST00000625293.2	No	DD191_Org; DD107_Org	2749233, 2749229	p.T89K	Stomach	Gastroesophageal junction, NS	NS	Carcinoma	Adenocarcinoma	NS	29703791	-	Confirmed Somatic	Cultured	Heterozygous	3:48466921..48466921	2	c.431C>A	p.T144K	c.236C>A	p.T79K
90	A	48466923	48508322	G>A	p.A90T	Nonsynonymous	7	T	A	89.9371	320.773	158	Yes	Mesocricetus auratus/Miniopterus natalensis/Leopardus geoffroyi
91	V	48466927		T>A	p.V91E	Nonsynonymous	3	E	V	58.4906	145.269	158	Yes	Arvicola amphibius/Microtus oregoni/Microtus ochrogaster/Myodes glareolus/Peromyscus leucopus/Onychomys torridus/Grammomys surdaster/Mus pahari/Mus musculus/Jaculus jaculus/Heterocephalus glaber/Octodon degus/Cavia porcellus/Castor canadensis/Cricetulus griseus/Mesocricetus auratus/Arvicanthis niloticus/Mus caroli/Mastomys coucha/Chinchilla lanigera/Fukomys damarensis/Camelus dromedarius/Vicugna …	p.V91E	COSM9812693	Substitution - Missense	TREX1_ENST00000625293	ENST00000625293.2	No	DD107_Org; DD191_Org	2749229, 2749233	p.V91E	Stomach	NS, Gastroesophageal junction	NS	Carcinoma	Adenocarcinoma	NS	29703791	-	Confirmed Somatic	Cultured	Heterozygous	3:48466927..48466927	2	c.437T>A	p.V146E	c.242T>A	p.V81E
91	V	48466926;48466926	48508325;	G>C;G>T	p.V91L	Nonsynonymous	3	L	V	58.4906	145.269	158	Yes	Meles meles/Sorex araneus	;p.V91L	;COSM3732496	;Substitution - Missense	;TREX1_ENST00000625293	;ENST00000625293.2	;No	;258	;2146918	;p.V91L	;Stomach	;Gastroesophageal junction	;NS	;Carcinoma	;Adenocarcinoma	;NS	;24308032	;-	;Confirmed Somatic	;Tumour Sample	;Unknown	;3:48466926..48466926	;1	;c.436G>T	;p.V146L	;c.241G>T	;p.V81L
92	L						11		L	99.3711	369.063	158	Yes
93	A	48466933		C>A	p.A93E	Nonsynonymous	3	E	A	75.4717	259.124	158	Yes	Arvicola amphibius/Microtus oregoni/Microtus ochrogaster/Myodes glareolus/Peromyscus leucopus/Peromyscus maniculatus bairdii/Onychomys torridus/Rattus norvegicus/Rattus rattus/Grammomys surdaster/Mus pahari/Mus musculus/Cricetulus griseus/Meriones unguiculatus/Mesocricetus auratus/Arvicanthis niloticus/Mus caroli/Mastomys coucha/Tupaia chinensis	p.A93E	COSM5864709	Substitution - Missense	TREX1_ENST00000625293	ENST00000625293.2	No	Pat_06_A; DD191_Org	2513788, 2749233	p.A93E	NS, Stomach	NS, Gastroesophageal junction	NS	Malignant melanoma, Carcinoma	NS, Adenocarcinoma	NS	24265153, 29703791	-	Confirmed Somatic	Tumour Sample, Cultured	Unknown, Heterozygous	3:48466933..48466933	2	c.443C>A	p.A148E	c.248C>A	p.A83E
93	A	48466932	48508331	G>C	p.A93P	Nonsynonymous	3	P	A	75.4717	259.124	158	Yes
93	A	48466932	48508331	G>A	p.A93T	Nonsynonymous	3	T	A	75.4717	259.124	158	Yes	Urocitellus parryii/Heterocephalus glaber/Fukomys damarensis/Propithecus coquereli/Equus quagga/Equus asinus/Equus caballus/Orycteropus afer afer/Erinaceus europaeus
94	A	48466937		G>A	p.A94A	Synonymous	8		A	89.9371	329.116	158	Yes
94	A	48466935		G>A	p.A94T	Nonsynonymous	8	T	A	89.9371	329.116	158	Yes	Meles meles	p.A94T	COSM6807705	Substitution - Missense	TREX1_ENST00000625293	ENST00000625293.2	No	T1202	2658262	p.A94T	Large intestine	NS	NS	Carcinoma	Adenocarcinoma	NS	27149842	-	Confirmed Somatic	Unknown	Unknown	3:48466935..48466935	1	c.445G>A	p.A149T	c.250G>A	p.A84T
94	A	48466936;48466936-48466937	48508335;	C>T;delinsTA	p.A94V	Nonsynonymous	8	V	A	89.9371	329.116	158	Yes	Arvicola amphibius/Microtus ochrogaster/Myodes glareolus/Peromyscus leucopus/Peromyscus maniculatus bairdii/Onychomys torridus/Mus pahari/Mus musculus/Mesocricetus auratus/Mus caroli/Pteropus alecto	;p.A94V	;COSM9823499	;Substitution - Missense	;TREX1_ENST00000625293	;ENST00000625293.2	;No	;DD191_Org	;2749233	;p.A94V	;Stomach	;Gastroesophageal junction	;NS	;Carcinoma	;Adenocarcinoma	;NS	;29703791	;-	;Confirmed Somatic	;Cultured	;Heterozygous	;3:48466936..48466937	;1	;c.446_447delinsTA	;p.A149V	;c.251_252delinsTA	;p.A84V
95	H	48466940		T>G	p.H95Q	Nonsynonymous	5	Q	H	89.9371	317.92	158	Yes	Mus pahari/Mus musculus/Mus caroli/Mastomys coucha	p.H95Q	COSM9812694	Substitution - Missense	TREX1_ENST00000625293	ENST00000625293.2	No	DD191_Org; DD107_Org	2749233, 2749229	p.H95Q	Stomach	Gastroesophageal junction, NS	NS	Carcinoma	Adenocarcinoma	NS	29703791	-	Confirmed Somatic	Cultured	Heterozygous	3:48466940..48466940	2	c.450T>G	p.H150Q	c.255T>G	p.H85Q
95	H	48466939	48508338	A>G	p.H95R	Nonsynonymous	5	R	H	89.9371	317.92	158	Yes
96	G	48466942	48508341	G>C	p.G96A	Nonsynonymous	10	A	G	94.9685	347.647	158	Yes	Rousettus aegyptiacus/Castor canadensis
96	G	48466941	48508340	G>A	p.G96R	Nonsynonymous	10	R	G	94.9685	347.647	158	Yes	Grammomys surdaster/Neophocaena asiaeorientalis asiaeorientalis/Rhinolophus ferrumequinum/Odobenus rosmarus divergens
96	G	48466941	48508340	G>T	p.G96W	Nonsynonymous	10	W	G	94.9685	347.647	158	Yes		p.G96W	COSM8727782	Substitution - Missense	TREX1_ENST00000625293	ENST00000625293.2	No	TCGA-66-2754-01	1782524	p.G96W	Lung	NS	NS	Carcinoma	Squamous cell carcinoma	NS	-	418	Confirmed Somatic	Tumour Sample	Unknown	3:48466941..48466941	1	c.451G>T	p.G151W	c.256G>T	p.G86W	ENST00000422277.2:c.451G>T	p.Gly151Trp	p.G151W	1	LUSC	lung_squamous_cell	missense_variant	novel	151
97	R	48466944	48508343	C>T	p.R97C	Nonsynonymous	10	C	R	98.7421	365.286	158	Yes
97	R	48466945	48508344	G>A	p.R97H	Nonsynonymous	10	H	R	98.7421	365.286	158	Yes	Ovis aries
97	R	48466944	48508343	C>A	p.R97S	Nonsynonymous	10	S	R	98.7421	365.286	158	Yes
98	Q	48466949		A>G	p.Q98Q	Synonymous	5		Q	86.1635	281.687	158	Yes
99	C	48466947-48466948	48508346-48508347	dup	p.C99fs	Frameshift	3		R	42.1384	0	158	No
99	C	48466947		dup	p.C99Mfs*3	Frameshift+Stop_gained	3		R	42.1384	0	158	No
99	C	48466950		T>C	p.C99R	Nonsynonymous	3	R	R	42.1384	0	158	No	Dipodomys ordii/Dipodomys spectabilis/Perognathus longimembris pacificus/Ictidomys tridecemlineatus/Marmota flaviventris/Marmota marmota marmota/Marmota monax/Urocitellus parryii/Rattus norvegicus/Rattus rattus/Grammomys surdaster/Mus pahari/Mus musculus/Jaculus jaculus/Octodon degus/Oryctolagus cuniculus/Hipposideros armiger/Vulpes lagopus/Arvicanthis niloticus/Mus caroli/Mastomys coucha/Vulpes …	p.C99R	COSM9812695	Substitution - Missense	TREX1_ENST00000625293	ENST00000625293.2	No	DD107_Org; DD191_Org	2749229, 2749233	p.C99R	Stomach	NS, Gastroesophageal junction	NS	Carcinoma	Adenocarcinoma	NS	29703791	-	Confirmed Somatic	Cultured	Heterozygous	3:48466950..48466950	2	c.460T>C	p.C154R	c.265T>C	p.C89R
99	C	48466951	48508350	G>A	p.C99Y	Nonsynonymous	3	Y	R	42.1384	0	158	No	Castor canadensis/Phacochoerus africanus/Sus scrofa
100	F	48466949-48466950	48508348-48508349	dup	p.F100fs	Frameshift	10		F	98.7421	365.095	158	Yes
100	F	48466955	48508354	T>A	p.F100L	Nonsynonymous	10	L	F	98.7421	365.095	158	Yes	Hipposideros armiger
100	F	48466949	48508348	dup	p.F100Lfs*3	Frameshift+Stop_gained	10		F	98.7421	365.095	158	Yes
100	F	48466954	48508353	T>C	p.F100S	Nonsynonymous	10	S	F	98.7421	365.095	158	Yes
101	D	48466958		T>C	p.D101D	Synonymous	8		D	91.8239	343.683	158	Yes
101	D	48466956	48508355	G>C	p.D101H	Nonsynonymous	8	H	D	91.8239	343.683	158	Yes		p.D101H	COSM7148075	Substitution - Missense	TREX1_ENST00000625293	ENST00000625293.2	No	TCGA-SY-A9G5-01	2340129	p.D101H	Urinary tract	Bladder	NS	Carcinoma	NS	NS	-	413	Confirmed Somatic	Tumour Sample	Unknown	3:48466956..48466956	1	c.466G>C	p.D156H	c.271G>C	p.D91H	ENST00000422277.2:c.466G>C	p.Asp156His	p.D156H	1	BLCA	bladder	missense_variant	novel	156
101	D	48466956	48508355	G>A	p.D101N	Nonsynonymous	8	N	D	91.8239	343.683	158	Yes	Rattus norvegicus/Otolemur garnettii/Miniopterus natalensis/Rhinolophus ferrumequinum/Chrysochloris asiatica/Orycteropus afer afer/Echinops telfairi/Trichechus manatus latirostris/Condylura cristata/Talpa occidentalis/Galeopterus variegatus	p.D101N	COSM7671315	Substitution - Missense	TREX1_ENST00000625293	ENST00000625293.2	No	TCGA-3C-AALI-01	2386094	p.D101N	Breast	NS	NS	Carcinoma	NS	NS	-	414	Confirmed Somatic	Tumour Sample	Unknown	3:48466956..48466956	1	c.466G>A	p.D156N	c.271G>A	p.D91N	ENST00000422277.2:c.466G>A	p.Asp156Asn	p.D156N	1	BRCA	breast	missense_variant	novel	156
102	D	48466961		C>T	p.D102D	Synonymous	5		A	52.8302	135.15	158	No
102	D	48466959		G>A	p.D102N	Nonsynonymous	5	N	A	52.8302	135.15	158	No	Ictidomys tridecemlineatus/Marmota flaviventris/Marmota marmota marmota/Marmota monax/Urocitellus parryii/Neosciurus carolinensis/Nannospalax galili/Heterocephalus glaber/Octodon degus/Chinchilla lanigera/Fukomys damarensis	p.D102N	COSM165117	Substitution - Missense	TREX1_ENST00000625293	ENST00000625293.2	No	PD4137a	1331107	p.D102N	Breast	NS	NS	Carcinoma	NS	NS	22722201	385	Confirmed Somatic	Tumour Sample	Unknown	3:48466959..48466959	1	c.469G>A	p.D157N	c.274G>A	p.D92N
103	N	48466963	48508362	A>T	p.N103I	Nonsynonymous	8	I	N	52.2013	258.217	158	Yes
103	N	48466964		C>T	p.N103N	Synonymous	8		N	52.2013	258.217	158	Yes
104	L	48466965;48466967;48466967	;;48508366	C>T;G>A;G>C	p.L104L	Synonymous	10		L	98.1132	367.428	158	Yes
104	L	48466966		T>C	p.L104P	Nonsynonymous	10	P	L	98.1132	367.428	158	Yes
105	A	48466970		C>T	p.A105A	Synonymous	8		A	76.7296	293.27	158	Yes
105	A	48466968		G>A	p.A105T	Nonsynonymous	8	T	A	76.7296	293.27	158	Yes		p.A105T	COSM1734721	Substitution - Missense	TREX1_ENST00000625293	ENST00000625293.2	No	ACINAR01	2068112	p.A105T	Pancreas	NS	NS	Carcinoma	Acinar carcinoma	NS	24293293	-	Confirmed Somatic	Tumour Sample	Unknown	3:48466968..48466968	1	c.478G>A	p.A160T	c.283G>A	p.A95T
106	N	48466972		A>T	p.N106I	Nonsynonymous	3	I	N	69.8113	222.912	158	Yes	Mus musculus/Mus caroli	p.N106I	COSM9823500	Substitution - Missense	TREX1_ENST00000625293	ENST00000625293.2	No	DD191_Org	2749233	p.N106I	Stomach	Gastroesophageal junction	NS	Carcinoma	Adenocarcinoma	NS	29703791	-	Confirmed Somatic	Cultured	Heterozygous	3:48466972..48466972	1	c.482A>T	p.N161I	c.287A>T	p.N96I
106	N	48466972	48508371	A>G	p.N106S	Nonsynonymous	3	S	N	69.8113	222.912	158	Yes	Peromyscus leucopus/Peromyscus maniculatus bairdii/Meriones unguiculatus/Mesocricetus auratus/Ochotona princeps/Ochotona curzoniae/Manis pentadactyla/Eumetopias jubatus/Zalophus californianus/Callorhinus ursinus/Odobenus rosmarus divergens/Halichoerus grypus/Mirounga leonina/Neomonachus schauinslandi/Leptonychotes weddellii/Phoca vitulina/Lontra canadensis/Dasypus novemcinctus/Manis javanica/Erin…
107	L						9		L	91.8239	362.115	158	Yes
108	L						10		L	91.8239	362.744	158	Yes
109	L	48466981		T>G	p.L109R	Nonsynonymous	4	R	R	39.6226	94.217	158	No	Grammomys surdaster/Mus pahari/Mus musculus/Rousettus aegyptiacus/Hipposideros armiger/Meriones unguiculatus/Arvicanthis niloticus/Mastomys coucha/Neogale vison/Lipotes vexillifer/Odocoileus virginianus texanus/Cervus elaphus/Cervus canadensis/Equus quagga/Equus asinus/Equus caballus/Ceratotherium simum simum/Balaenoptera acutorostrata scammoni/Balaenoptera musculus/Orcinus orca/Lagenorhynchus ob…	p.L109R	COSM9823501	Substitution - Missense	TREX1_ENST00000625293	ENST00000625293.2	No	DD191_Org	2749233	p.L109R	Stomach	Gastroesophageal junction	NS	Carcinoma	Adenocarcinoma	NS	29703791	-	Confirmed Somatic	Cultured	Heterozygous	3:48466981..48466981	1	c.491T>G	p.L164R	c.296T>G	p.L99R
110	A	48466985		C>T	p.A110A	Synonymous	8		A	93.0818	349.71	158	Yes
110	A	48466984	48508383	C>G	p.A110G	Nonsynonymous	8	G	A	93.0818	349.71	158	Yes	Odobenus rosmarus divergens/Galeopterus variegatus
111	F						11		F	99.3711	367.953	158	Yes
112	L	48466989		C>T	p.L112L	Synonymous	11		L	99.3711	369.063	158	Yes
113	R	48466992	48508391	C>G	p.R113G	Nonsynonymous	8	G	Q	76.7296	315.767	158	No
113	R	48466993	48508392	G>A	p.R113Q	Nonsynonymous	8	Q	Q	76.7296	315.767	158	No	Perognathus longimembris pacificus/Ictidomys tridecemlineatus/Marmota flaviventris/Marmota marmota marmota/Marmota monax/Urocitellus parryii/Neosciurus carolinensis/Nannospalax galili/Arvicola amphibius/Microtus oregoni/Microtus ochrogaster/Myodes glareolus/Peromyscus leucopus/Peromyscus maniculatus bairdii/Onychomys torridus/Rattus norvegicus/Rattus rattus/Grammomys surdaster/Mus pahari/Mus musc…	p.R113Q	COSM9823502	Substitution - Missense	TREX1_ENST00000625293	ENST00000625293.2	No	DD191_Org	2749233	p.R113Q	Stomach	Gastroesophageal junction	NS	Carcinoma	Adenocarcinoma	NS	29703791	-	Confirmed Somatic	Cultured	Heterozygous	3:48466993..48466993	1	c.503G>A	p.R168Q	c.308G>A	p.R103Q
113	R	48466994	48508393	G>A	p.R113R	Synonymous	8		Q	76.7296	315.767	158	No
113	R	48466992	48508391	C>T	p.R113W	Nonsynonymous	8	W	Q	76.7296	315.767	158	No
114	R	48466995	48508394	C>T	p.R114C	Nonsynonymous	10	C	R	98.7421	365.286	158	Yes
114	R	48466996	48508395	G>A	p.R114H	Nonsynonymous	10	H	R	98.7421	365.286	158	Yes	Perognathus longimembris pacificus
115	Q	48466998		C>T	p.Q115*	Stop_gained	10		Q	98.7421	357.83	158	Yes		p.Q115*	COSM4005556	Substitution - Nonsense	TREX1_ENST00000625293	ENST00000625293.2	No	B25-Tumor	2185752	p.Q115*	Urinary tract	Bladder	NS	Carcinoma	NS	NS	-	581	Confirmed Somatic	Unknown	Unknown	3:48466998..48466998	1	c.508C>T	p.Q170*	c.313C>T	p.Q105*
115	Q	48467000	48508399	G>T	p.Q115H	Nonsynonymous	10	H	Q	98.7421	357.83	158	Yes
116	P	48467001	48508400	C>G	p.P116A	Nonsynonymous	11	A	P	99.3711	369.46	158	Yes
116	P	48467002	48508401	C>T	p.P116L	Nonsynonymous	11	L	P	99.3711	369.46	158	Yes
116	P	48467003	48508402	A>G	p.P116P	Synonymous	11		P	99.3711	369.46	158	Yes
117	Q	48467005		A>G	p.Q117R	Nonsynonymous	10	R	Q	93.7107	339.436	158	Yes	Peromyscus maniculatus bairdii/Fukomys damarensis
118	P						11		P	99.3711	369.46	158	Yes
119	W	48467012	48508411	G>A	p.W119*	Stop_gained	7		W	86.7925	214.338	158	Yes
119	W	48467012		G>C	p.W119C	Nonsynonymous	7	C	W	86.7925	214.338	158	Yes	Arvicola amphibius/Microtus oregoni/Microtus ochrogaster/Myodes glareolus/Peromyscus leucopus/Peromyscus maniculatus bairdii/Onychomys torridus/Rattus norvegicus/Rattus rattus/Grammomys surdaster/Mus pahari/Mus musculus/Cricetulus griseus/Meriones unguiculatus/Mesocricetus auratus/Arvicanthis niloticus/Mus caroli/Mastomys coucha	p.W119C	COSM9823503	Substitution - Missense	TREX1_ENST00000625293	ENST00000625293.2	No	DD191_Org	2749233	p.W119C	Stomach	Gastroesophageal junction	NS	Carcinoma	Adenocarcinoma	NS	29703791	-	Confirmed Somatic	Cultured	Heterozygous	3:48467012..48467012	1	c.522G>C	p.W174C	c.327G>C	p.W109C
120	C						10		C	99.3711	374.188	159	Yes
121	L	48467016		C>T	p.L121L	Synonymous	10		L	98.7421	372.2	159	Yes
122	V	48467020	48508419	T>C	p.V122A	Nonsynonymous	10	A	V	97.4843	375.687	159	Yes
123	A	48467024;48467024		A>C;A>G	p.A123A	Synonymous	11		A	100	377.888	159	Yes
123	A	48467021-48467023	48508420-48508422	dup	p.A123dup	Insertion	11		A	100	377.888	159	Yes
123	A	48467022	48508421	G>C	p.A123P	Nonsynonymous	11	P	A	100	377.888	159	Yes		p.A123P	COSM7156324	Substitution - Missense	TREX1_ENST00000625293	ENST00000625293.2	No	TCGA-UY-A9PF-01	2385786	p.A123P	Urinary tract	Bladder	NS	Carcinoma	NS	NS	-	413	Confirmed Somatic	Tumour Sample	Unknown	3:48467022..48467022	1	c.532G>C	p.A178P	c.337G>C	p.A113P	ENST00000422277.2:c.532G>C	p.Ala178Pro	p.A178P	1	BLCA	bladder	missense_variant	novel	178
124	H	48467025	48508424	C>G	p.H124D	Nonsynonymous	11	D	H	100	377.888	159	Yes
124	N	48467030	48508429	T>C	p.N124N	Synonymous	11		H	100	377.888	159	No
125	N	48467029	48508428	A>G	p.N125S	Nonsynonymous	11	S	N	100	377.888	159	Yes
126	G	48467029-48467030	48508428-48508429	dup	p.G126fs	Frameshift	11		G	100	377.888	159	Yes
126	G	48467030	48508429	dup	p.G126Wfs*2	Frameshift+Stop_gained	11		G	100	377.888	159	Yes
127	D	48467036		C>A	p.D127E	Nonsynonymous	10	E	D	98.1132	372.251	159	Yes		p.D127E	COSM382883	Substitution - Missense	TREX1_ENST00000625293	ENST00000625293.2	No	LUAD-RT-S01810	1765179	p.D127E	Lung	NS	NS	Carcinoma	Adenocarcinoma	NS	22980975	-	Variant of unknown origin	Tumour Sample	Unknown	3:48467036..48467036	1	c.546C>A	p.D182E	c.351C>A	p.D117E
127	D	48467035	48508434	A>T	p.D127V	Nonsynonymous	10	V	D	98.1132	372.251	159	Yes
128	R	48467037	48508436	C>T	p.R128C	Nonsynonymous	10	C	R	98.1132	364.804	159	Yes
128	R	-;48467038	;48508437	?;G>A	p.R128H	Nonsynonymous	10	H	R	98.1132	364.804	159	Yes	Enhydra lutris kenyoni
129	Y	48467042	48508441	C>T	p.Y129Y	Synonymous	10		Y	99.3711	376.437	159	Yes
130	D	48467043	48508442	G>C	p.D130H	Nonsynonymous	11	H	D	100	377.888	159	Yes
130	D	48467043	48508442	G>A	p.D130N	Nonsynonymous	11	N	D	100	377.888	159	Yes
131	F	48467046;48467048	;48508447	T>C;C>G	p.F131L	Nonsynonymous	11	L	F	100	377.888	159	Yes
131	F	48467046	48508445	T>G	p.F131V	Nonsynonymous	11	V	F	100	377.888	159	Yes
132	P	48467049	48508448	C>G	p.P132A	Nonsynonymous	11	A	P	100	377.888	159	Yes
132	P	48467049	48508448	C>T	p.P132S	Nonsynonymous	11	S	P	100	377.888	159	Yes
132	P	48467049	48508448	C>A	p.P132T	Nonsynonymous	11	T	P	100	377.888	159	Yes
133	L	48467052	48508451	del	p.L133Cfs*27	Frameshift+Stop_gained	11		L	100	377.888	159	Yes
133	L	48467048	48508447	del	p.L133fs	Frameshift	11		L	100	377.888	159	Yes																												ENST00000422277.2:c.562del	p.Leu188CysfsTer27	p.L188Cfs*27	1	STAD	stomach	frameshift_variant	rs78762691	186
133	L	48467052		C>G	p.L133V	Nonsynonymous	11	V	L	100	377.888	159	Yes
134	L	48467055	48508454	C>T	p.L134F	Nonsynonymous	11	F	L	100	377.888	159	Yes
134	L	48467053-48467054	48508452-48508453	dup	p.L134fs	Frameshift	11		L	100	377.888	159	Yes
135	Q	48467058	48508457	C>T	p.Q135*	Stop_gained	8		Q	86.7925	335.339	159	Yes
135	Q	48467058	48508457	C>G	p.Q135E	Nonsynonymous	8	E	Q	86.7925	335.339	159	Yes
135	Q	48467059		A>G	p.Q135R	Nonsynonymous	8	R	Q	86.7925	335.339	159	Yes	Octodon degus/Chinchilla lanigera/Odocoileus virginianus texanus/Cervus elaphus/Cervus canadensis/Bos taurus/Bison bison bison/Bos mutus/Bos indicus/Bubalus bubalis/Capra hircus/Camelus dromedarius/Oryx dammah/Ovis aries/Vicugna pacos/Camelus ferus/Eptesicus fuscus/Pipistrellus kuhlii/Galeopterus variegatus
136	A	48467062	48508461	C>T	p.A136V	Nonsynonymous	8	V	A	96.2264	367.211	159	Yes
137	E	48467065	48508464	A>C	p.E137A	Nonsynonymous	11	A	E	100	377.888	159	Yes
137	E	48467047-48467048	48508446-48508447	dup	p.E137fs	Frameshift	11		E	100	377.888	159	Yes
137	E	48467048-48467063	48508447-48508462	dup	p.E137Pfs*24	Frameshift+Stop_gained	11		E	100	377.888	159	Yes
138	L	48467067	48508466	C>G	p.L138V	Nonsynonymous	10	V	L	97.4843	368.826	159	Yes
139	A	48467072	48508471	T>C	p.A139A	Synonymous	8		A	93.7107	363.012	159	Yes
139	A	48467071	48508470	del	p.A139fs	Frameshift	8		A	93.7107	363.012	159	Yes
139	A	48467068		del	p.A139Lfs*21	Frameshift+Stop_gained	8		A	93.7107	363.012	159	Yes
139	A	48467070;48467070-48467071		del;del	p.A139Vfs*21	Frameshift+Stop_gained	8		A	93.7107	363.012	159	Yes
139	A	48467070-48467071	48508469-48508470	del	p.A139Yfs*16	Frameshift+Stop_gained	8		A	93.7107	363.012	159	Yes
140	M	48467075		G>A	p.M140I	Nonsynonymous	7	I	M	38.9937	244.282	159	Yes	Myodes glareolus	p.M140I	COSM9979299	Substitution - Missense	TREX1_ENST00000625293	ENST00000625293.2	No	EOSRC-IN-2497	2902090	p.M140I	Large intestine	Rectum	NS	Carcinoma	Adenocarcinoma	NS	33262464	-	Confirmed Somatic	Tumour Sample	Unknown	3:48467075..48467075	1	c.585G>A	p.M195I	c.390G>A	p.M130I
140	M	48467074	48508473	T>C	p.M140T	Nonsynonymous	7	T	M	38.9937	244.282	159	Yes	Perognathus longimembris pacificus/Oryctolagus cuniculus/Carlito syrichta/Lemur catta
140	M	48467073	48508472	A>G	p.M140V	Nonsynonymous	7	V	M	38.9937	244.282	159	Yes	Vulpes lagopus/Vulpes vulpes/Neogale vison/Lipotes vexillifer/Canis lupus familiaris/Equus quagga/Equus asinus/Equus caballus/Ceratotherium simum simum/Balaenoptera acutorostrata scammoni/Balaenoptera musculus/Orcinus orca/Lagenorhynchus obliquidens/Tursiops truncatus/Delphinapterus leucas/Neophocaena asiaeorientalis asiaeorientalis/Pteropus vampyrus/Pteropus giganteus/Pteropus alecto/Desmodus ro…	p.M140V	COSM4602096	Substitution - Missense	TREX1_ENST00000625293	ENST00000625293.2	No	WSU-HN6	2296295	p.M140V	Upper aerodigestive tract	Head neck	NS	Carcinoma	Squamous cell carcinoma	NS	25275298	-	Variant of unknown origin	Cultured	Unknown	3:48467073..48467073	1	c.583A>G	p.M195V	c.388A>G	p.M130V
141	L						11		L	100	377.888	159	Yes
142	G						8		G	87.4214	340.463	159	Yes
143	L	48467084	48508483	C>T	p.L143L	Synonymous	7		L	81.1321	295.788	159	Yes
143	L	48467082	48508481	C>G	p.L143V	Nonsynonymous	7	V	L	81.1321	295.788	159	Yes	Dipodomys ordii/Dipodomys spectabilis/Rattus norvegicus/Rattus rattus/Desmodus rotundus/Phyllostomus discolor
144	T	48467085	48508484	A>T	p.T144S	Nonsynonymous	6	S	A	62.2642	274.575	159	No	Peromyscus leucopus/Peromyscus maniculatus bairdii/Onychomys torridus/Jaculus jaculus/Oryctolagus cuniculus/Mus caroli/Rhinolophus sinicus/Rhinolophus ferrumequinum/Ursus maritimus/Choloepus didactylus/Sorex araneus
145	S	48467089	48508488	G>A	p.S145N	Nonsynonymous	4	N	S	84.9057	311.916	159	Yes	Oryctolagus cuniculus/Microcebus murinus/Propithecus coquereli/Lemur catta
146	A						4		A	56.6038	206.299	159	Yes
147	L	48467095		T>A	p.L147Q	Nonsynonymous	10	Q	L	99.3711	377.301	159	Yes
148	D						9		D	94.9685	361.684	159	Yes
149	G	48467101	48508500	G>C	p.G149A	Nonsynonymous	5	A	G	81.1321	288.498	159	Yes	Bos mutus
149	G	48467101	48508500	G>T	p.G149V	Nonsynonymous	5	V	G	81.1321	288.498	159	Yes
150	A	48467103		G>A	p.A150T	Nonsynonymous	8	T	A	79.8742	320.875	159	Yes	Perognathus longimembris pacificus/Arvicola amphibius/Microtus oregoni/Microtus ochrogaster/Myodes glareolus/Peromyscus leucopus/Peromyscus maniculatus bairdii/Rattus norvegicus/Rattus rattus/Grammomys surdaster/Mus pahari/Mus musculus/Rousettus aegyptiacus/Cricetulus griseus/Meriones unguiculatus/Arvicanthis niloticus/Mus caroli/Mastomys coucha/Phacochoerus africanus/Sus scrofa/Pteropus vampyrus…	p.A150T	COSM6807708	Substitution - Missense	TREX1_ENST00000625293	ENST00000625293.2	No	T335135	2658230	p.A150T	Large intestine	NS	NS	Carcinoma	Adenocarcinoma	NS	27149842	-	Confirmed Somatic	Unknown	Unknown	3:48467103..48467103	1	c.613G>A	p.A205T	c.418G>A	p.A140T
151	F	48467108	48508507	C>G	p.F151L	Nonsynonymous	8	L	F	93.7107	350.035	159	Yes	Neogale vison/Manis pentadactyla/Mustela erminea/Mustela putorius furo/Enhydra lutris kenyoni/Lutra lutra/Lontra canadensis/Meles meles/Orycteropus afer afer/Manis javanica
152	C						11		C	100	377.888	159	Yes
153	V	48467114		G>A	p.V153V	Synonymous	8		V	94.3396	361.736	159	Yes
154	D	48467117	48508516	T>C	p.D154D	Synonymous	11		D	100	377.888	159	Yes
155	S	48467118	48508517	A>G	p.S155G	Nonsynonymous	11	G	S	100	377.888	159	Yes
155	S	48467119	48508518	G>C	p.S155T	Nonsynonymous	11	T	S	100	377.888	159	Yes		p.S155T	COSM7760783	Substitution - Missense	TREX1_ENST00000625293	ENST00000625293.2	No	TCGA-67-3771-01	1780201	p.S155T	Lung	NS	NS	Carcinoma	Adenocarcinoma	NS	-	417	Confirmed Somatic	Tumour Sample	Unknown	3:48467119..48467119	1	c.629G>C	p.S210T	c.434G>C	p.S145T	ENST00000422277.2:c.629G>C	p.Ser210Thr	p.S210T	1	LUAD	lung_adenocarcinoma	missense_variant	.	210
156	I	48467123	48508522	C>T	p.I156I	Synonymous	9		I	94.3396	367.363	159	Yes																												ENST00000422277.2:c.633C>T	p.Ile211=	p.I211=	1	SKCM	melanoma	synonymous_variant	novel	211
156	I	48467123	48508522	C>G	p.I156M	Nonsynonymous	9	M	I	94.3396	367.363	159	Yes	Dipodomys ordii/Dipodomys spectabilis/Perognathus longimembris pacificus/Grammomys surdaster/Oryctolagus cuniculus/Arvicanthis niloticus/Ochotona princeps/Ochotona curzoniae/Dasypus novemcinctus
156	I	48467122	48508521	del	p.I156Tfs*4	Frameshift+Stop_gained	9		I	94.3396	367.363	159	Yes
157	T	48467124	48508523	A>G	p.T157A	Nonsynonymous	8	A	A	76.1006	329.533	159	No	Dipodomys ordii/Dipodomys spectabilis/Ictidomys tridecemlineatus/Marmota flaviventris/Marmota marmota marmota/Marmota monax/Urocitellus parryii/Neosciurus carolinensis/Nannospalax galili/Arvicola amphibius/Microtus oregoni/Microtus ochrogaster/Myodes glareolus/Peromyscus leucopus/Peromyscus maniculatus bairdii/Onychomys torridus/Rattus norvegicus/Rattus rattus/Grammomys surdaster/Mus pahari/Mus m…
157	T	48467125	48508524	C>G	p.T157S	Nonsynonymous	8	S	A	76.1006	329.533	159	No	Heterocephalus glaber
158	A	48467129		G>A	p.A158A	Synonymous	11		A	100	377.888	159	Yes
158	A	48467128	48508527	C>T	p.A158V	Nonsynonymous	11	V	A	100	377.888	159	Yes
159	L	48467132		G>A	p.L159L	Synonymous	10		L	97.4843	375.568	159	Yes
160	K	48467134		A>T	p.K160M	Nonsynonymous	10	M	K	97.4843	374.808	159	Yes
160	K	48467133	48508532	A>C	p.K160Q	Nonsynonymous	10	Q	K	97.4843	374.808	159	Yes
161	A						10		A	98.1132	373.487	159	Yes
162	L	48467141	48508540	G>A	p.L162L	Synonymous	9		L	91.8239	367.674	159	Yes
163	E	48467143		A>G	p.E163G	Nonsynonymous	11	G	E	100	377.888	159	Yes		p.E163G	COSM5014338	Substitution - Missense	TREX1_ENST00000625293	ENST00000625293.2	No	61	2370253	p.E163G	Kidney	NS	NS	Carcinoma	Papillary renal cell carcinoma	NS	25401301	-	Confirmed Somatic	Tumour Sample	Unknown	3:48467143..48467143	1	c.653A>G	p.E218G	c.458A>G	p.E153G
164	R	48467145	48508544	C>T	p.R164*	Stop_gained	3		Q	46.5409	228.306	159	No
164	R	48467146	48508545	G>C	p.R164P	Nonsynonymous	3	P	Q	46.5409	228.306	159	No	Odocoileus virginianus texanus/Cervus elaphus/Cervus canadensis/Bos taurus/Bison bison bison/Bos mutus/Bos indicus/Bubalus bubalis/Capra hircus/Oryx dammah/Ovis aries
164	R	48467146	48508545	G>A	p.R164Q	Nonsynonymous	3	Q	Q	46.5409	228.306	159	No	Dipodomys ordii/Dipodomys spectabilis/Ictidomys tridecemlineatus/Marmota flaviventris/Marmota marmota marmota/Marmota monax/Urocitellus parryii/Peromyscus leucopus/Peromyscus maniculatus bairdii/Onychomys torridus/Rattus norvegicus/Rattus rattus/Grammomys surdaster/Mus pahari/Mus musculus/Heterocephalus glaber/Octodon degus/Cavia porcellus/Oryctolagus cuniculus/Hipposideros armiger/Cricetulus gri…	p.R164Q	COSM6807706	Substitution - Missense	TREX1_ENST00000625293	ENST00000625293.2	No	TCGA-MV-A51V-01; T1791	2193279, 2658246	p.R164Q	Urinary tract, Large intestine	Bladder, NS	NS	Carcinoma	NS, Adenocarcinoma	NS	-, 27149842	413, -	Confirmed Somatic	Unknown	Unknown	3:48467146..48467146	2	c.656G>A	p.R219Q	c.461G>A	p.R154Q	ENST00000422277.2:c.656G>A	p.Arg219Gln	p.R219Q	1	BLCA	bladder	missense_variant	rs143885312	219
165	A	48467149	48508548	C>A	p.A165E	Nonsynonymous	4	E	A	81.1321	301.944	159	Yes
166	S	48467152	48508551	G>C	p.S166T	Nonsynonymous	5	T	G	42.1384	220.299	159	No	Galeopterus variegatus
167	S	48467155	48508554	G>A	p.S167N	Nonsynonymous	4	N	S	90.566	332.532	158	Yes	Ictidomys tridecemlineatus/Otolemur garnettii
167	S	48467156	48508555	C>T	p.S167S	Synonymous	4		S	90.566	332.532	158	Yes
167	S	48467154;48467155	;48508554	del;del	p.S167Tfs*13	Frameshift+Stop_gained	4		S	90.566	332.532	158	Yes
168	P	48467159		C>G	p.P168P	Synonymous	2		P	77.9874	271.944	158	Yes
169	S	48467161		C>G	p.S169*	Stop_gained	7		S	83.6478	277.974	159	Yes		p.S169*	COSM3373211	Substitution - Nonsense	TREX1_ENST00000625293	ENST00000625293.2	No	TCGA-DE-A0Y3-01	2121854	p.S169*	Thyroid	NS	NS	Carcinoma	NS	NS	-	542	Confirmed Somatic	Unknown	Unknown	3:48467161..48467161	1	c.671C>G	p.S224*	c.476C>G	p.S159*
170	E	48467163	48508562	G>T	p.E170*	Stop_gained	3		E	87.4214	313.656	159	Yes
170	E	48467164	48508563	A>G	p.E170G	Nonsynonymous	3	G	E	87.4214	313.656	159	Yes	Mus pahari/Mus musculus/Meriones unguiculatus/Mus caroli/Carlito syrichta
170	E	48467163	48508562	G>A	p.E170K	Nonsynonymous	3	K	E	87.4214	313.656	159	Yes	Rousettus aegyptiacus/Pteropus vampyrus/Pteropus giganteus/Pteropus alecto/Orycteropus afer afer
171	H	48467168	48508567	del	p.H171fs	Frameshift	4		H	79.8742	239.538	159	Yes
171	H	48467168		C>T	p.H171H	Synonymous	4		H	79.8742	239.538	159	Yes
172	G	48467169	48508568	G>A	p.G172S	Nonsynonymous	8	S	G	96.2264	367.66	159	Yes	Oryctolagus cuniculus/Ochotona princeps/Ochotona curzoniae/Condylura cristata/Erinaceus europaeus	p.G172S	COSM323974	Substitution - Missense	TREX1_ENST00000625293	ENST00000625293.2	No	19; 2334193	2497130, 1759433	p.G172S	Pancreas, Lung	Ampulla of Vater, NS	NS	Carcinoma	NS, Small cell carcinoma	NS	26806338, 22941189	-	Confirmed Somatic, Previously Reported	Tumour Sample, Cultured	Unknown	3:48467169..48467169	2	c.679G>A	p.G227S	c.484G>A	p.G162S
173	P	48467172		C>T	p.P173S	Nonsynonymous	7	S	P	92.4528	336.089	159	Yes	Mus musculus/Heterocephalus glaber/Cavia porcellus/Fukomys damarensis/Elephantulus edwardii/Manis javanica
174	R	48467175	48508574	A>G	p.R174G	Nonsynonymous	6	G	R	93.7107	313.126	159	Yes
174	R	48467176		G>A	p.R174K	Nonsynonymous	6	K	R	93.7107	313.126	159	Yes	Cavia porcellus/Panthera tigris/Panthera leo/Panthera pardus
174	R	48467177		G>A	p.R174R	Synonymous	6		R	93.7107	313.126	159	Yes
175	K	48467180;48467180	48508579;48508579	G>C;G>T	p.K175N	Nonsynonymous	9	N	K	91.8239	363.302	159	Yes		p.K175N	COSM7110899;COSM8034255	Substitution - Missense	TREX1_ENST00000625293	ENST00000625293.2	No	TCGA-E7-A7DV-01;TCGA-ER-A19Q-06	2193219;2121727	p.K175N	Urinary tract;Skin	Bladder;NS	NS	Carcinoma;Malignant melanoma	NS	NS	-	413;540	Confirmed Somatic	Unknown	Unknown	3:48467180..48467180	1	c.690G>C;c.690G>T	p.K230N	c.495G>C;c.495G>T	p.K165N	ENST00000422277.2:c.690G>C;ENST00000422277.2:c.690G>T	p.Lys230Asn	p.K230N	1	BLCA;SKCM	bladder;melanoma	missense_variant	novel	230
176	S	48467181	48508580	A>G	p.S176G	Nonsynonymous	11	G	S	100	377.888	159	Yes
176	S	48467182	48508581	G>T	p.S176I	Nonsynonymous	11	I	S	100	377.888	159	Yes
177	Y	48467185	48508584	A>G	p.Y177C	Nonsynonymous	11	C	Y	100	377.888	159	Yes		p177C	COSM8522230	Substitution - Missense	TREX1_ENST00000625293	ENST00000625293.2	No	36	2748008	p177C	Stomach	NS	NS	Carcinoma	NS	NS	-	683	Confirmed Somatic	Tumour Sample	Unknown	3:48467185..48467185	1	c.695A>G	p232C	c.500A>G	p167C
177	Y	48467186;48467186	48508585;	C>T;T>C	p.Y177Y	Synonymous	11		Y	100	377.888	159	Yes
178	S						11		S	100	377.888	159	Yes
179	L	48467191	48508590	T>C	p.L179P	Nonsynonymous	11	P	L	100	377.888	159	Yes
180	G	48467195		C>A	p.G180G	Synonymous	8		G	92.4528	347.666	159	Yes
180	G	48467193		G>A	p.G180S	Nonsynonymous	8	S	G	92.4528	347.666	159	Yes	Suricata suricatta/Hyaena hyaena/Condylura cristata/Talpa occidentalis	p.G180S	COSM139455	Substitution - Missense	TREX1_ENST00000625293	ENST00000625293.2	No	cSCCP7	1604873	p.G180S	Skin	Face	NS	Carcinoma	Squamous cell carcinoma	NS	21984974	-	Confirmed Somatic	Tumour Sample	Unknown	3:48467193..48467193	1	c.703G>A	p.G235S	c.508G>A	p.G170S
181	S	48467198	48508597	C>T	p.S181S	Synonymous	9		S	93.0818	352.217	159	Yes																												ENST00000422277.2:c.708C>T	p.Ser236=	p.S236=	1	PAAD	pancreas	synonymous_variant	rs948439253	236
182	I	48467185-48467186		insCAGCCTAGGCAGCGCTA	p.I182Afs*4	Frameshift+Stop_gained	9		I	87.4214	371.958	159	Yes		p.I182Afs*4	COSM9430711	Insertion - Frameshift	TREX1_ENST00000625293	ENST00000625293.2	No	EXTERN_MELA_20140505_038	2839416	p.I182Afs*4	Skin	Ear	NS	Malignant melanoma	NS	NS	28467829	-	Confirmed Somatic	Tumour Sample	Unknown	3:48467185..48467186	1	c.695_696insCAGCCTAGGCAGCGCTA	p.I237Afs*4	c.500_501insCAGCCTAGGCAGCGCTA	p.I172Afs*4
182	I	48467195-48467196	48508594-48508595	dup	p.I182fs	Frameshift	9		I	87.4214	371.958	159	Yes
182	I	48467201		C>G	p.I182M	Nonsynonymous	9	M	I	87.4214	371.958	159	Yes		p.I182M	COSM9595112	Substitution - Missense	TREX1_ENST00000625293	ENST00000625293.2	No	S01496	2864349	p.I182M	Lung	NS	NS	Carcinoma	Large cell neuroendocrine carcinoma	NS	29535388	-	Confirmed Somatic	Tumour Sample	Unknown	3:48467201..48467201	1	c.711C>G	p.I237M	c.516C>G	p.I172M
183	Y	48467203	48508602	A>G	p.Y183C	Nonsynonymous	11	C	Y	100	377.888	159	Yes
184	T	48467206		C>T	p.T184I	Nonsynonymous	7	I	T	89.3082	338.954	159	Yes		p.T184I	COSM5615293	Substitution - Missense	TREX1_ENST00000625293	ENST00000625293.2	No	LU-1991	2478820	p.T184I	Lung	NS	NS	Carcinoma	Adenocarcinoma	NS	22510280	-	Confirmed Somatic	Tumour Sample	Unknown	3:48467206..48467206	1	c.716C>T	p.T239I	c.521C>T	p.T174I
185	R	48467208	48508607	C>T	p.R185C	Nonsynonymous	11	C	R	100	377.888	159	Yes
185	R	48467208		C>G	p.R185G	Nonsynonymous	11	G	R	100	377.888	159	Yes
185	R	48467209	48508608	G>A	p.R185H	Nonsynonymous	11	H	R	100	377.888	159	Yes
185	R	48467210		C>T	p.R185R	Synonymous	11		R	100	377.888	159	Yes
186	L	48467211;48467213	;48508612	C>T;G>A	p.L186L	Synonymous	11		L	100	377.888	159	Yes																												;ENST00000422277.2:c.723G>A	;p.Leu241=	;p.L241=	;1	;UCEC	;endometrial	;synonymous_variant	;novel	;241
187	Y						10		Y	98.7421	375.006	159	Yes
188	G	48467217		G>A	p.G188R	Nonsynonymous	10	R	G	98.7421	365.645	159	Yes	Elephantulus edwardii
189	Q						7		Q	94.9685	367.896	159	Yes
190	S						7		A	76.7296	312.45	159	No
191	P	48467226	48508625	C>A	p.P191T	Nonsynonymous	10	T	P	99.3711	375.142	159	Yes		p.P191T	COSM7989177	Substitution - Missense	TREX1_ENST00000625293	ENST00000625293.2	No	TCGA-D3-A1Q3-06	2121499	p.P191T	Skin	NS	NS	Malignant melanoma	NS	NS	-	540	Confirmed Somatic	Unknown	Unknown	3:48467226..48467226	1	c.736C>A	p.P246T	c.541C>A	p.P181T	ENST00000422277.2:c.736C>A	p.Pro246Thr	p.P246T	1	SKCM	melanoma	missense_variant	rs750738235	246
192	P						6		P	74.8428	242.786	159	Yes
193	D	48467233	48508632	A>G	p.D193G	Nonsynonymous	10	G	D	99.3711	376.275	159	Yes
194	S	48467236	48508635	del	p.S194fs	Frameshift	10		S	99.3711	376.426	159	Yes
194	S	48467236	48508635	C>T	p.S194L	Nonsynonymous	10	L	S	99.3711	376.426	159	Yes
194	S	48467237		G>A	p.S194S	Synonymous	10		S	99.3711	376.426	159	Yes
195	H						11		H	100	377.888	159	Yes
196	T	48467241	48508640	A>G	p.T196A	Nonsynonymous	8	A	T	76.7296	280.8	159	Yes
196	T	48467242	48508641	C>T	p.T196M	Nonsynonymous	8	M	T	76.7296	280.8	159	Yes	Dipodomys ordii/Dipodomys spectabilis/Octodon degus/Cavia porcellus/Vulpes lagopus/Chinchilla lanigera/Vulpes vulpes/Neogale vison/Canis lupus familiaris/Eumetopias jubatus/Zalophus californianus/Callorhinus ursinus/Odobenus rosmarus divergens/Halichoerus grypus/Mirounga leonina/Neomonachus schauinslandi/Leptonychotes weddellii/Phoca vitulina/Mustela erminea/Mustela putorius furo/Enhydra lutris k…
196	T	48467243		G>A	p.T196T	Synonymous	8		T	76.7296	280.8	159	Yes
197	A	48467246		T>C	p.A197A	Synonymous	11		A	100	377.888	159	Yes
197	A	48467245	48508644	C>T	p.A197V	Nonsynonymous	11	V	A	100	377.888	159	Yes
198	E	48467247	48508646	G>A	p.E198K	Nonsynonymous	11	K	E	100	377.888	159	Yes
199	G						8		G	88.6792	350.01	159	Yes
200	D	48467251		dup	p.D200dup	Insertion	11		D	100	377.888	159	Yes
200	D	48467254-48467256	48508653-48508655	dup	p.D200dup	Insertion	11		D	100	377.888	159	Yes
200	D	48467253	48508652	G>C	p.D200H	Nonsynonymous	11	H	D	100	377.888	159	Yes
200	D	48467253	48508652	G>A	p.D200N	Nonsynonymous	11	N	D	100	377.888	159	Yes
201	V	48467257	48508656	T>A	p.V201D	Nonsynonymous	10	D	V	99.3711	375.63	159	Yes
201	V	48467253		dup	p.V201Mfs*77	Frameshift+Stop_gained	10		V	99.3711	375.63	159	Yes
202	L	48467253-48467254	48508652-48508653	dup	p.L202fs	Frameshift	11		L	100	377.888	159	Yes
202	L	48467260	48508659	T>G	p.L202R	Nonsynonymous	11	R	L	100	377.888	159	Yes
203	A	48467262	48508661	G>A	p.A203T	Nonsynonymous	8	T	A	88.0503	352.782	159	Yes	Dipodomys ordii/Dipodomys spectabilis/Perognathus longimembris pacificus/Mus musculus/Octodon degus/Cavia porcellus/Chinchilla lanigera/Neogale vison/Eumetopias jubatus/Zalophus californianus/Callorhinus ursinus/Halichoerus grypus/Lutra lutra/Meles meles/Suricata suricatta/Hyaena hyaena
203	A	48467263	48508662	C>T	p.A203V	Nonsynonymous	8	V	A	88.0503	352.782	159	Yes
204	L	48467264-48467317	48508663-48508716	dup	p.L204_A221dup	Insertion	11		L	100	377.888	159	Yes
205	L						9		L	95.5975	372.202	159	Yes
206	S	48467271	48508670	A>G	p.S206G	Nonsynonymous	10	G	S	98.1132	369.094	159	Yes	Sturnira hondurensis/Pipistrellus kuhlii/Chrysochloris asiatica
206	S	48467272	48508671	G>A	p.S206N	Nonsynonymous	10	N	S	98.1132	369.094	159	Yes
207	I	48467275-48467276	48508674-48508675	del	p.I207fs	Frameshift	9		I	92.4528	374.573	159	Yes
207	I	48467276		C>T	p.I207I	Synonymous	9		I	92.4528	374.573	159	Yes
207	I	48467276	48508675	C>G	p.I207M	Nonsynonymous	9	M	I	92.4528	374.573	159	Yes
208	C	48467278	48508677	G>C	p.C208S	Nonsynonymous	11	S	C	100	377.888	159	Yes
209	Q	48467282	48508681	G>C	p.Q209H	Nonsynonymous	11	H	Q	100	377.888	159	Yes
209	Q	48467280		C>A	p.Q209K	Nonsynonymous	11	K	Q	100	377.888	159	Yes
209	Q	48467282		G>A	p.Q209Q	Synonymous	11		Q	100	377.888	159	Yes
209	Q	48467281		A>G	p.Q209R	Nonsynonymous	11	R	Q	100	377.888	159	Yes		p.Q209R	COSM6807709	Substitution - Missense	TREX1_ENST00000625293	ENST00000625293.2	No	T3422	2658323	p.Q209R	Large intestine	NS	NS	Carcinoma	Adenocarcinoma	NS	27149842	-	Confirmed Somatic	Unknown	Unknown	3:48467281..48467281	1	c.791A>G	p.Q264R	c.596A>G	p.Q199R
210	W	48467284	48508683	G>A	p.W210*	Stop_gained	11		W	100	377.888	159	Yes
210	W	48467277-48467278	48508676-48508677	dup	p.W210fs	Frameshift	11		W	100	377.888	159	Yes
210	W	48467283	48508682	T>C	p.W210R	Nonsynonymous	11	R	W	100	377.888	159	Yes		p.W210R	COSM480210	Substitution - Missense	TREX1_ENST00000625293	ENST00000625293.2	No	TCGA-CJ-5682-01	1779994	p.W210R	Kidney	NS	NS	Carcinoma	Clear cell renal cell carcinoma	NS	-	416	Confirmed Somatic	Tumour Sample	Unknown	3:48467283..48467283	1	c.793T>C	p.W265R	c.598T>C	p.W200R	ENST00000422277.2:c.793T>C	p.Trp265Arg	p.W265R	1	KIRC	kidney_clear_cell	missense_variant	rs770775387	265
210	W	48467277;48467280-48467283	;48508679-48508682	dup;dup	p.W210Sfs*32	Frameshift+Stop_gained	11		W	100	377.888	159	Yes
211	R	48467287	48508686	G>T	p.R211I	Nonsynonymous	9	I	R	81.761	361.1	159	Yes
211	R	48467287	48508686	G>A	p.R211K	Nonsynonymous	9	K	R	81.761	361.1	159	Yes	Dipodomys ordii/Dipodomys spectabilis/Perognathus longimembris pacificus/Ictidomys tridecemlineatus/Marmota flaviventris/Marmota marmota marmota/Marmota monax/Urocitellus parryii/Arvicola amphibius/Microtus oregoni/Microtus ochrogaster/Myodes glareolus/Peromyscus leucopus/Peromyscus maniculatus bairdii/Onychomys torridus/Rattus norvegicus/Rattus rattus/Grammomys surdaster/Mus pahari/Mus musculus/…
211	R	48467288		A>G	p.R211R	Synonymous	9		R	81.761	361.1	159	Yes
211	R	48467288	48508687	A>C	p.R211S	Nonsynonymous	9	S	R	81.761	361.1	159	Yes
212	P	48467289	48508688	del	p.P212fs	Frameshift	10		P	98.1132	370.81	159	Yes
212	P	48467288		del	p.P212Hfs*65	Frameshift+Stop_gained	10		P	98.1132	370.81	159	Yes
212	P	48467290	48508689	del	p.P212Hfs*65	Frameshift+Stop_gained	10		P	98.1132	370.81	159	Yes
213	Q	48467293	48508692	A>G	p.Q213R	Nonsynonymous	7	R	Q	56.6038	304.495	159	Yes	Arvicola amphibius/Microtus oregoni/Myodes glareolus/Peromyscus leucopus/Peromyscus maniculatus bairdii/Onychomys torridus/Hipposideros armiger/Cricetulus griseus/Meriones unguiculatus/Mesocricetus auratus/Odocoileus virginianus texanus/Cervus elaphus/Cervus canadensis/Equus quagga/Equus asinus/Equus caballus/Ceratotherium simum simum/Orcinus orca/Lagenorhynchus obliquidens/Tursiops truncatus/Pha…
214	A	48467295	48508694	G>A	p.A214T	Nonsynonymous	11	T	A	100	377.888	159	Yes
215	L	48467300		G>A	p.L215L	Synonymous	11		L	100	377.888	159	Yes
216	L	48467302	48508701	T>C	p.L216P	Nonsynonymous	11	P	L	100	377.888	159	Yes
217	R	48467305	48508704	G>A	p.R217Q	Nonsynonymous	6	Q	Q	52.2013	302.701	159	No	Dipodomys ordii/Dipodomys spectabilis/Ictidomys tridecemlineatus/Marmota flaviventris/Marmota marmota marmota/Marmota monax/Urocitellus parryii/Neosciurus carolinensis/Nannospalax galili/Arvicola amphibius/Microtus oregoni/Microtus ochrogaster/Myodes glareolus/Peromyscus leucopus/Peromyscus maniculatus bairdii/Onychomys torridus/Rattus norvegicus/Rattus rattus/Grammomys surdaster/Mus pahari/Mus m…
217	R	48467306	48508705	G>A	p.R217R	Synonymous	6		Q	52.2013	302.701	159	No
217	R	48467304	48508703	C>T	p.R217W	Nonsynonymous	6	W	Q	52.2013	302.701	159	No
218	W	48467309		G>C	p.W218C	Nonsynonymous	11	C	W	100	377.888	159	Yes		p.W218C	COSM1617721	Substitution - Missense	TREX1_ENST00000625293	ENST00000625293.2	No	HCC71T; HCC71	1919230, 2120874	p.W218C	Liver	NS	NS	Carcinoma	NS	NS	-	323	Previously Reported, Confirmed Somatic	Tumour Sample, Unknown	Heterozygous, Unknown	3:48467309..48467309	2	c.819G>C	p.W273C	c.624G>C	p.W208C
218	W	48467308	48508707	G>T	p.W218L	Nonsynonymous	11	L	W	100	377.888	159	Yes		p.W218L	COSM8114019	Substitution - Missense	TREX1_ENST00000625293	ENST00000625293.2	No	TCGA-D3-A3C6-06	2121528	p.W218L	Skin	NS	NS	Malignant melanoma	NS	NS	-	540	Confirmed Somatic	Unknown	Unknown	3:48467308..48467308	1	c.818G>T	p.W273L	c.623G>T	p.W208L	ENST00000422277.2:c.818G>T	p.Trp273Leu	p.W273L	1	SKCM	melanoma	missense_variant	novel	273
219	V	48467310		G>A	p.V219M	Nonsynonymous	10	M	V	97.4843	373.917	159	Yes	Dasypus novemcinctus
220	D	48467314	48508713	A>G	p.D220G	Nonsynonymous	11	G	D	100	377.888	159	Yes
221	A						5		A	77.9874	298.467	159	Yes
222	H	48467321;48467321	48508720;48508720	C>A;C>G	p.H222Q	Nonsynonymous	10	Q	H	96.8554	361.071	159	Yes
223	A	48467324		C>T	p.A223A	Synonymous	10		A	98.7421	375.474	159	Yes
223	A	48467322	48508721	G>A	p.A223T	Nonsynonymous	10	T	A	98.7421	375.474	159	Yes
224	R	48467326		G>T	p.R224M	Nonsynonymous	9	M	R	84.9057	361.095	159	Yes		p.R224M	COSM4118202	Substitution - Missense	TREX1_ENST00000625293	ENST00000625293.2	No	TCGA-CD-A4MG-01	2198123	p.R224M	Stomach	NS	NS	Carcinoma	Adenocarcinoma	NS	-	541	Confirmed Somatic	Unknown	Unknown	3:48467326..48467326	1	c.836G>T	p.R279M	c.641G>T	p.R214M
225	P						10		P	98.7421	365.281	159	Yes
226	F	48467333		C>T	p.F226F	Synonymous	10		F	98.1132	368.519	159	Yes
226	F	48467331;48467333	48508730;48508732	T>C;C>G	p.F226L	Nonsynonymous	10	L	F	98.1132	368.519	159	Yes	Peromyscus leucopus/Peromyscus maniculatus bairdii
227	G	48467334	48508733	G>A	p.G227S	Nonsynonymous	4	S	S	84.9057	315.763	159	No	Neosciurus carolinensis/Arvicola amphibius/Microtus oregoni/Microtus ochrogaster/Peromyscus leucopus/Peromyscus maniculatus bairdii/Onychomys torridus/Rattus norvegicus/Rattus rattus/Grammomys surdaster/Mus pahari/Mus musculus/Jaculus jaculus/Heterocephalus glaber/Octodon degus/Cavia porcellus/Rousettus aegyptiacus/Castor canadensis/Oryctolagus cuniculus/Hipposideros armiger/Cricetulus griseus/Vu…
228	T	48467338		C>T	p.T228I	Nonsynonymous	7	I	T	92.4528	361.481	159	Yes
228	T	48467339	48508738	C>A	p.T228T	Synonymous	7		T	92.4528	361.481	159	Yes																												ENST00000422277.2:c.849C>A	p.Thr283=	p.T283=	1	SKCM	melanoma	synonymous_variant	novel	283
229	I	48467338		dup	p.I229dup	Insertion	9		V	60.3774	361.917	159	No
229	I	48467340	48508739	A>G	p.I229V	Nonsynonymous	9	V	V	60.3774	361.917	159	No	Peromyscus leucopus/Peromyscus maniculatus bairdii/Rattus rattus/Mus pahari/Mus musculus/Heterocephalus glaber/Cavia porcellus/Rousettus aegyptiacus/Castor canadensis/Hipposideros armiger/Vulpes lagopus/Meriones unguiculatus/Mesocricetus auratus/Mus caroli/Chinchilla lanigera/Vulpes vulpes/Carlito syrichta/Neogale vison/Lipotes vexillifer/Cervus elaphus/Cervus canadensis/Ochotona princeps/Ochoton…
230	R	48467345		G>A	p.R230R	Synonymous	7		K	74.8428	339.229	159	No
230	R	48467345	48508744	G>C	p.R230S	Nonsynonymous	7	S	K	74.8428	339.229	159	No
231	P						11		P	100	377.888	159	Yes
232	M	48467348	48508747	dup	p.M232Hfs*9	Frameshift+Stop_gained	11		M	100	377.888	159	Yes
232	M	48467351		G>T	p.M232I	Nonsynonymous	11	I	M	100	377.888	159	Yes
232	M	48467350	48508749	T>G	p.M232R	Nonsynonymous	11	R	M	100	377.888	159	Yes
232	M	48467349	48508748	A>G	p.M232V	Nonsynonymous	11	V	M	100	377.888	159	Yes
233	Y						11		Y	100	377.888	159	Yes
234	G	48467355	48508754	G>T	p.G234W	Nonsynonymous	2	W	G	57.8616	111.605	159	Yes
235	V	48467354-48467355	48508753-48508754	dup	p.V235fs	Frameshift	6		V	76.7296	314.554	159	Yes
235	V	48467359	48508758	T>G	p.V235G	Nonsynonymous	6	G	V	76.7296	314.554	159	Yes	Perognathus longimembris pacificus/Erinaceus europaeus
235	V	48467358;48467358-48467359	48508757;	dup;dup	p.V235Gfs*6	Frameshift+Stop_gained	6		V	76.7296	314.554	159	Yes		;p.V235Gfs*6	;COSM10051203	;Insertion - Frameshift	;TREX1_ENST00000625293	;ENST00000625293.2	;No	;CRC237	;2730815	;p.V235Gfs*6	;Large intestine	;Colon	;NS	;Carcinoma	;Adenocarcinoma	;NS	;26416732	;-	;Confirmed Somatic	;Cultured	;Unknown	;3:48467358..48467359	;1	;c.868dup	;p.V290Gfs*6	;c.673dup	;p.V225Gfs*6
236	T	48467361	48508760	A>G	p.T236A	Nonsynonymous	7	A	T	70.4403	247.525	157	Yes	Arvicola amphibius/Microtus oregoni/Microtus ochrogaster/Myodes glareolus/Peromyscus leucopus/Peromyscus maniculatus bairdii/Onychomys torridus/Rattus norvegicus/Rattus rattus/Mus pahari/Cricetulus griseus/Mesocricetus auratus/Mastomys coucha/Tupaia chinensis	p.T236A	COSM8316010	Substitution - Missense	TREX1_ENST00000625293	ENST00000625293.2	No	TCGA-F7-A624-01	2193851	p.T236A	Upper aerodigestive tract	Head neck	NS	Carcinoma	Squamous cell carcinoma	NS	-	627	Confirmed Somatic	Unknown	Unknown	3:48467361..48467361	1	c.871A>G	p.T291A	c.676A>G	p.T226A	ENST00000422277.2:c.871A>G	p.Thr291Ala	p.T291A	1	HNSC	head_and_neck	missense_variant	.	291
236	T	48467357-48467358	48508756-48508757	dup	p.T236fs	Frameshift	7		T	70.4403	247.525	157	Yes
236	T	48467361	48508760	dup	p.T236Nfs*5	Frameshift+Stop_gained	7		T	70.4403	247.525	157	Yes
236	T	48467361	48508760	A>T	p.T236S	Nonsynonymous	7	S	T	70.4403	247.525	157	Yes		p.T236S	COSM3993122	Substitution - Missense	TREX1_ENST00000625293	ENST00000625293.2	No	TCGA-A4-7585-01	2194073	p.T236S	Kidney	NS	NS	Carcinoma	Papillary renal cell carcinoma	NS	-	543	Confirmed Somatic	Unknown	Unknown	3:48467361..48467361	1	c.871A>T	p.T291S	c.676A>T	p.T226S	ENST00000422277.2:c.871A>T	p.Thr291Ser	p.T291S	1	KIRP	kidney_papillary_cell	missense_variant	.	291
237	A						8		A	85.5346	323.246	157	Yes
238	S	48467369		T>G	p.S238S	Synonymous	7		S	72.956	260.748	157	Yes
239	A						6		A	49.0566	266.234	157	Yes
240	R	48467374	48508773	G>A	p.R240K	Nonsynonymous	0	K	G	71.0692	209.353	153	No	Condylura cristata/Talpa occidentalis
240	R	48467375	48508774	G>A	p.R240R	Synonymous	0		G	71.0692	209.353	153	No
240	R	48467375	48508774	G>C	p.R240S	Nonsynonymous	0	S	G	71.0692	209.353	153	No	Callithrix jacchus
241	T	48467376		A>T	p.T241S	Nonsynonymous	8	S	T	88.0503	303.126	155	Yes
242	K	48467381		G>A	p.K242K	Synonymous	4		N	51.5723	207.45	158	No
243	P	48467383	48508782	C>G	p.P243R	Nonsynonymous	4	R	P	72.956	232.97	158	Yes	Carlito syrichta
244	R						4		R	71.0692	228.611	158	Yes
245	P	48467389		C>T	p.P245L	Nonsynonymous	4	L	P	76.1006	269.442	159	Yes	Rattus norvegicus/Lipotes vexillifer	p.P245L	COSM3070402	Substitution - Missense	TREX1_ENST00000625293	ENST00000625293.2	No	KM12	2301990	p.P245L	Large intestine	NS	NS	Carcinoma	Adenocarcinoma	NS	24755471	-	Variant of unknown origin	Cultured	Heterozygous	3:48467389..48467389	1	c.899C>T	p.P300L	c.704C>T	p.P235L
245	P	48467390		A>C	p.P245P	Synonymous	4		P	76.1006	269.442	159	Yes
245	P	48467389	48508788	C>G	p.P245R	Nonsynonymous	4	R	P	76.1006	269.442	159	Yes	Ictidomys tridecemlineatus/Marmota flaviventris/Marmota marmota marmota/Marmota monax/Urocitellus parryii/Cricetulus griseus/Meriones unguiculatus/Mesocricetus auratus/Arvicanthis niloticus/Mus caroli/Mastomys coucha/Sorex araneus
245	P	48467388	48508787	C>T	p.P245S	Nonsynonymous	4	S	P	76.1006	269.442	159	Yes	Oryctolagus cuniculus/Microcebus murinus/Propithecus coquereli/Lemur catta/Otolemur garnettii/Sturnira hondurensis/Artibeus jamaicensis/Desmodus rotundus/Phyllostomus discolor/Molossus molossus/Miniopterus natalensis/Myotis myotis/Myotis davidii/Panthera leo/Choloepus didactylus/Dasypus novemcinctus/Elephantulus edwardii
246	S	48467388		dup	p.S246dup	Insertion	4		S	76.1006	222.721	159	Yes
246	S	48467393		T>G	p.S246S	Synonymous	4		S	76.1006	222.721	159	Yes
247	A	48467394	48508793	G>C	p.A247P	Nonsynonymous	10	P	A	89.3082	314.517	159	Yes	Manis pentadactyla/Manis javanica
247	A	48467394	48508793	G>A	p.A247T	Nonsynonymous	10	T	A	89.3082	314.517	159	Yes
247	A	48467395	48508794	C>T	p.A247V	Nonsynonymous	10	V	A	89.3082	314.517	159	Yes	Fukomys damarensis/Galeopterus variegatus	p.A247V	COSM6807710	Substitution - Missense	TREX1_ENST00000625293	ENST00000625293.2	No	T3646	2658258	p.A247V	Large intestine	NS	NS	Carcinoma	Adenocarcinoma	NS	27149842	-	Confirmed Somatic	Unknown	Unknown	3:48467395..48467395	1	c.905C>T	p.A302V	c.710C>T	p.A237V
248	V						6		A	36.478	216.421	159	No
249	T	48467401	48508800	C>T	p.T249I	Nonsynonymous	4	I	T	71.0692	263.858	157	Yes	Jaculus jaculus/Chlorocebus sabaeus/Ceratotherium simum simum/Chrysochloris asiatica/Condylura cristata
249	T	48467401		C>A	p.T249K	Nonsynonymous	4	K	T	71.0692	263.858	157	Yes	Phacochoerus africanus/Sus scrofa/Oryx dammah
250	T	48467401-48467402	48508800-48508801	dup	p.T250fs	Frameshift	8		A	78.6164	310.164	156	No
250	T	48467398-48467401	48508797-48508800	dup	p.T250Hfs*13	Frameshift+Stop_gained	8		A	78.6164	310.164	156	No
250	T	48467404	48508803	C>T	p.T250I	Nonsynonymous	8	I	A	78.6164	310.164	156	No
250	T	48467404		C>G	p.T250S	Nonsynonymous	8	S	A	78.6164	310.164	156	No	Mus pahari	p.T250S	COSM9230296	Substitution - Missense	TREX1_ENST00000625293	ENST00000625293.2	No	F69_329967	2815722	p.T250S	Large intestine	Rectum	NS	Carcinoma	Adenocarcinoma	NS	31660073	-	Confirmed Somatic	Tumour Sample	Unknown	3:48467404..48467404	1	c.914C>G	p.T305S	c.719C>G	p.T240S
251	T	48467407	48508806	C>T	p.T251I	Nonsynonymous	6	I	T	75.4717	267.684	156	Yes	Perognathus longimembris pacificus/Octodon degus/Castor canadensis
252	A						4		A	35.2201	182.309	159	Yes
253	H	48467412	48508811	C>G	p.H253D	Nonsynonymous	1	D	P	35.8491	75.4268	159	No
253	H	48467413	48508812	A>G	p.H253R	Nonsynonymous	1	R	P	35.8491	75.4268	159	No	Ochotona princeps/Ochotona curzoniae/Desmodus rotundus/Phyllostomus discolor
253	H	48467412	48508811	C>T	p.H253Y	Nonsynonymous	1	Y	P	35.8491	75.4268	159	No
254	L	48467415		C>G	p.L254V	Nonsynonymous	6	V	L	86.1635	281.516	159	Yes	Jaculus jaculus/Oryctolagus cuniculus/Fukomys damarensis	p.L254V	COSM1162199	Substitution - Missense	TREX1_ENST00000625293	ENST00000625293.2	No	PA018	1820268	p.L254V	Pancreas	NS	NS	Carcinoma	Ductal carcinoma	NS	22156295	-	Confirmed Somatic	Cultured	Unknown	3:48467415..48467415	1	c.925C>G	p.L309V	c.730C>G	p.L244V
255	A						6		A	74.8428	273.987	159	Yes
256	T	48467422	48508821	del	p.T256fs	Frameshift	4		R	44.6541	214.005	159	No
256	T	48467421		del	p.T256Kfs*21	Frameshift+Stop_gained	4		R	44.6541	214.005	159	No
257	T	48467425	48508824	C>T	p.T257I	Nonsynonymous	8	I	A	60.3774	281.97	159	No
258	R						0		R	55.9748	186.455	142	Yes
259	N						1		N	47.1698	207.156	152	Yes
260	T						1		T	73.5849	261.623	153	Yes
261	S	48467437	48508836	del	p.S261Ifs*16	Frameshift+Stop_gained	8		S	79.8742	267.625	155	Yes
261	S	48467437	48508836	G>A	p.S261N	Nonsynonymous	8	N	S	79.8742	267.625	155	Yes	Otolemur garnettii/Sorex araneus
262	P	48467435-48467436	48508834-48508835	del	p.P262fs	Frameshift	4		P	80.5031	261.683	155	Yes
262	P	48467439	48508838	C>T	p.P262S	Nonsynonymous	4	S	P	80.5031	261.683	155	Yes	Onychomys torridus/Castor canadensis/Carlito syrichta/Pan troglodytes/Capra hircus/Miniopterus natalensis
263	S	48467442	48508841	A>G	p.S263G	Nonsynonymous	5	G	NS	42.1384	240.959	158	No	Arvicanthis niloticus
263	S	48467443	48508842	G>A	p.S263N	Nonsynonymous	5	N	NS	42.1384	240.959	158	No	Jaculus jaculus/Hipposideros armiger/Vulpes lagopus/Mastomys coucha/Fukomys damarensis/Vulpes vulpes/Neogale vison/Lipotes vexillifer/Odocoileus virginianus texanus/Cervus elaphus/Cervus canadensis/Canis lupus familiaris/Equus quagga/Equus asinus/Equus caballus/Ceratotherium simum simum/Balaenoptera acutorostrata scammoni/Balaenoptera musculus/Orcinus orca/Lagenorhynchus obliquidens/Tursiops trun…
264	L						1		L	62.8931	132.963	159	Yes
265	G	48467449		G>C	p.G265A	Nonsynonymous	3	A	G	74.8428	238.31	156	Yes		p.G265A	COSM345536	Substitution - Missense	TREX1_ENST00000625293	ENST00000625293.2	No	LUAD-S01315	1765261	p.G265A	Lung	NS	NS	Carcinoma	Adenocarcinoma	NS	22980975	-	Variant of unknown origin	Tumour Sample	Unknown	3:48467449..48467449	1	c.959G>C	p.G320A	c.764G>C	p.G255A
265	G	48467448		G>A	p.G265R	Nonsynonymous	3	R	G	74.8428	238.31	156	Yes	Castor canadensis/Odocoileus virginianus texanus/Cervus elaphus/Cervus canadensis/Bos taurus/Bison bison bison/Bos mutus/Bos indicus/Bubalus bubalis/Oryx dammah/Ovis aries/Myotis myotis/Myotis davidii/Choloepus didactylus/Echinops telfairi
265	G	48467449		G>T	p.G265V	Nonsynonymous	3	V	G	74.8428	238.31	156	Yes	Trichechus manatus latirostris	p.G265V	COSM730661	Substitution - Missense	TREX1_ENST00000625293	ENST00000625293.2	No	TCGA-39-5039-01	1781598	p.G265V	Lung	NS	NS	Carcinoma	Squamous cell carcinoma	NS	-	418	Confirmed Somatic	Tumour Sample	Unknown	3:48467449..48467449	1	c.959G>T	p.G320V	c.764G>T	p.G255V
266	E	48467451	48508850	G>T	p.E266*	Stop_gained	3		R	41.5094	134.835	156	No
266	E	48467453		G>C	p.E266D	Nonsynonymous	3	D	R	41.5094	134.835	156	No	Pan paniscus/Pan troglodytes/Macaca nemestrina
266	E	48467452	48508851	A>G	p.E266G	Nonsynonymous	3	G	R	41.5094	134.835	156	No	Neosciurus carolinensis/Hipposideros armiger/Sapajus apella/Cebus imitator/Lipotes vexillifer/Odocoileus virginianus texanus/Cervus elaphus/Cervus canadensis/Saimiri boliviensis boliviensis/Callithrix jacchus/Aotus nancymaae/Microcebus murinus/Propithecus coquereli/Lemur catta/Equus quagga/Equus asinus/Equus caballus/Balaenoptera acutorostrata scammoni/Balaenoptera musculus/Orcinus orca/Lagenorhy…	p.E266G	COSM7394905	Substitution - Missense	TREX1_ENST00000625293	ENST00000625293.2	No	H125	2776318	p.E266G	Lung	NS	NS	Carcinoma	Mixed adenosquamous carcinoma	NS	29681454	-	Variant of unknown origin	Unknown	Unknown	3:48467452..48467452	1	c.962A>G	p.E321G	c.767A>G	p.E256G
267	S	48467453-48467454	48508852-48508853	dup	p.S267fs	Frameshift	3		S	38.9937	198.897	159	Yes
267	S	48467454		A>G	p.S267G	Nonsynonymous	3	G	S	38.9937	198.897	159	Yes	Oryctolagus cuniculus/Vulpes lagopus/Vulpes vulpes/Neogale vison/Canis lupus familiaris/Equus quagga/Equus asinus/Equus caballus/Ceratotherium simum simum/Manis pentadactyla/Pipistrellus kuhlii/Eumetopias jubatus/Zalophus californianus/Callorhinus ursinus/Odobenus rosmarus divergens/Halichoerus grypus/Mirounga leonina/Neomonachus schauinslandi/Leptonychotes weddellii/Phoca vitulina/Mustela ermine…
268	R	48467457	48508856	del	p.R268fs	Frameshift	9		R	88.6792	317.238	157	Yes
268	R	48467449-48467450	48508848-48508849	dup	p.R268fs	Frameshift	9		R	88.6792	317.238	157	Yes
268	R	48467458	48508857	G>A	p.R268K	Nonsynonymous	9	K	R	88.6792	317.238	157	Yes	Dipodomys ordii/Dipodomys spectabilis/Rousettus aegyptiacus/Ochotona princeps/Ochotona curzoniae/Pteropus vampyrus/Pteropus giganteus/Pteropus alecto/Elephantulus edwardii
268	R	48467458	48508857	G>C	p.R268T	Nonsynonymous	9	T	R	88.6792	317.238	157	Yes
269	G	48467461	48508860	G>A	p.G269D	Nonsynonymous	4	D	R	45.9119	238.288	156	No
269	G	48467458	48508857	del	p.G269fs	Frameshift	4		R	45.9119	238.288	156	No
269	G	48467462		T>C	p.G269G	Synonymous	4		R	45.9119	238.288	156	No
269	G	48467460	48508859	G>A	p.G269S	Nonsynonymous	4	S	R	45.9119	238.288	156	No	Odocoileus virginianus texanus/Cervus elaphus/Cervus canadensis/Sus scrofa/Bos taurus/Bison bison bison/Bos mutus/Bos indicus/Bubalus bubalis/Capra hircus/Camelus dromedarius/Oryx dammah/Ovis aries/Vicugna pacos/Camelus ferus/Loxodonta africana
270	T						6		P	85.5346	299.057	158	No
271	K	48467468		G>A	p.K271K	Synonymous	6		K	85.5346	334.626	159	Yes
272	D	48467470	48508869	A>C	p.D272A	Nonsynonymous	0	A	A	19.4969	130.621	94	No	Ictidomys tridecemlineatus/Marmota flaviventris/Marmota marmota marmota/Marmota monax/Urocitellus parryii/Neosciurus carolinensis/Nannospalax galili/Jaculus jaculus/Heterocephalus glaber/Cavia porcellus/Chinchilla lanigera/Fukomys damarensis/Carlito syrichta/Neogale vison/Ochotona princeps/Ochotona curzoniae/Microcebus murinus/Propithecus coquereli/Lemur catta/Equus quagga/Equus asinus/Equus caba…
272	D	48467471	48508870	T>C	p.D272D	Synonymous	0		A	19.4969	130.621	94	No																												ENST00000422277.2:c.981T>C	p.Asp327=	p.D327=	1	ESCA	esophagus	synonymous_variant	novel	327
272	D	48467468	48508867	del	p.D272fs	Frameshift	0		A	19.4969	130.621	94	No
272	D	48467467-48467468	48508866-48508867	dup	p.D272Rfs*6	Frameshift+Stop_gained	0		A	19.4969	130.621	94	No
273	L	48467472	48508871	C>T	p.L273F	Nonsynonymous	6	F	L	64.1509	184.34	158	Yes	Jaculus jaculus/Talpa occidentalis
273	L	48467472	48508871	C>G	p.L273V	Nonsynonymous	6	V	L	64.1509	184.34	158	Yes	Perognathus longimembris pacificus/Marmota flaviventris/Marmota marmota marmota/Marmota monax/Urocitellus parryii/Neosciurus carolinensis/Neogale vison/Eumetopias jubatus/Zalophus californianus/Callorhinus ursinus/Odobenus rosmarus divergens/Halichoerus grypus/Mirounga leonina/Neomonachus schauinslandi/Phoca vitulina/Mustela erminea/Mustela putorius furo/Enhydra lutris kenyoni/Lutra lutra/Meles m…
274	P	48467476		C>T	p.P274L	Nonsynonymous	4	L	P	67.9245	198.722	159	Yes	Cavia porcellus/Panthera tigris/Panthera leo/Panthera pardus/Felis catus/Puma concolor/Lynx canadensis/Prionailurus viverrinus/Leopardus geoffroyi/Suricata suricatta/Hyaena hyaena/Chrysochloris asiatica/Orycteropus afer afer/Echinops telfairi/Loxodonta africana/Trichechus manatus latirostris/Condylura cristata
275	P						7		P	88.6792	322.972	159	Yes
276	V	48467483		G>A	p.V276V	Synonymous	2		V	30.8176	163.423	159	Yes
277	K	48467484	48508883	A>T	p.K277*	Stop_gained	5		K	60.3774	240.938	158	Yes
278	D	48467482-48467483	48508881-48508882	dup	p.D278fs	Frameshift	4		G	40.8805	55.9116	159	No
278	D	48467488	48508887	A>T	p.D278V	Nonsynonymous	4	V	G	40.8805	55.9116	159	No	Dipodomys ordii/Dipodomys spectabilis/Perognathus longimembris pacificus/Ictidomys tridecemlineatus/Marmota marmota marmota/Marmota monax/Urocitellus parryii/Neosciurus carolinensis/Arvicola amphibius/Microtus oregoni/Microtus ochrogaster/Myodes glareolus/Rattus norvegicus/Rattus rattus/Grammomys surdaster/Mus pahari/Mus musculus/Heterocephalus glaber/Octodon degus/Cavia porcellus/Castor canadens…
279	P	48467491		C>A	p.P279H	Nonsynonymous	7	H	P	84.2767	301.259	159	Yes	Elephantulus edwardii	p.P279H	COSM3673987	Substitution - Missense	TREX1_ENST00000625293	ENST00000625293.2	No	TCGA-CH-5739-01	1797153	p.P279H	Prostate	NS	NS	Carcinoma	Adenocarcinoma	NS	-	435	Confirmed Somatic	Tumour Sample	Unknown	3:48467491..48467491	1	c.1001C>A	p.P334H	c.806C>A	p.P269H
280	G	48467492		del	p.G280Efs*18	Frameshift+Stop_gained	4		G	69.8113	216.593	158	Yes
280	G	48467493		G>A	p.G280R	Nonsynonymous	4	R	G	69.8113	216.593	158	Yes	Microcebus murinus/Ursus maritimus/Ailuropoda melanoleuca/Dasypus novemcinctus	p.G280R	COSM9908184	Substitution - Missense	TREX1_ENST00000625293	ENST00000625293.2	No	PD42111a	2894820	p.G280R	Skin	Trunk	NS	Malignant melanoma	Superficial spreading	NS	33024263	-	Variant of unknown origin	Tumour Sample	Unknown	3:48467493..48467493	1	c.1003G>A	p.G335R	c.808G>A	p.G270R
280	G	48467494	48508893	G>T	p.G280V	Nonsynonymous	4	V	G	69.8113	216.593	158	Yes	Galeopterus variegatus	p.G280V	COSM7110900	Substitution - Missense	TREX1_ENST00000625293	ENST00000625293.2	No	TCGA-E7-A7DV-01	2193219	p.G280V	Urinary tract	Bladder	NS	Carcinoma	NS	NS	-	413	Confirmed Somatic	Unknown	Unknown	3:48467494..48467494	1	c.1004G>T	p.G335V	c.809G>T	p.G270V	ENST00000422277.2:c.1004G>T	p.Gly335Val	p.G335V	1	BLCA	bladder	missense_variant	novel	335
281	A	48467498		C>T	p.A281A	Synonymous	3		A	74.8428	272.487	158	Yes
282	L	48467501		A>G	p.L282L	Synonymous	4		P	49.0566	137.574	158	No
283	S	48467503		C>G	p.S283C	Nonsynonymous	4	C	P	72.327	231.924	157	No	Manis pentadactyla/Manis javanica	p.S283C	COSM6353871	Substitution - Missense	TREX1_ENST00000625293	ENST00000625293.2	No	KPOPBR-072-T	2633627	p.S283C	Breast	NS	NS	Carcinoma	NS	NS	-	669	Confirmed Somatic	Tumour Sample	Unknown	3:48467503..48467503	1	c.1013C>G	p.S338C	c.818C>G	p.S273C
284	R	48467505	48508904	dup	p.R284Kfs*41	Frameshift+Stop_gained	4		R	49.0566	207.619	158	Yes
285	E	48467509	48508908	A>T	p.E285V	Nonsynonymous	4	V	E	91.8239	318.494	159	Yes
286	G	48467512	48508911	G>A	p.G286E	Nonsynonymous	0	E	G	88.6792	290.022	151	Yes	Oryctolagus cuniculus/Cricetulus griseus/Ochotona princeps/Ochotona curzoniae
286	G	48467511	48508910	G>A	p.G286R	Nonsynonymous	0	R	G	88.6792	290.022	151	Yes	Papio anubis/Carlito syrichta/Pteropus vampyrus/Pteropus giganteus/Pteropus alecto	p.G286R	COSM8230343	Substitution - Missense	TREX1_ENST00000625293	ENST00000625293.2	No	TCGA-EM-A2CS-06	2185868	p.G286R	Thyroid	NS	NS	Carcinoma	NS	NS	-	542	Confirmed Somatic	Unknown	Unknown	3:48467511..48467511	1	c.1021G>A	p.G341R	c.826G>A	p.G276R
287	L	48467513	48508912	dup	p.L287Afs*38	Frameshift+Stop_gained	10		L	98.7421	374.457	159	Yes
287	L	48467513	48508912	del	p.L287Cfs*11	Frameshift+Stop_gained	10		L	98.7421	374.457	159	Yes
287	L	48467509-48467510	48508908-48508909	dup	p.L287fs	Frameshift	10		L	98.7421	374.457	159	Yes
288	L						10		L	99.3711	377.05	159	Yes
289	A	48467511-48467520	48508910-48508919	dup	p.A289Gfs*39	Frameshift+Stop_gained	8		A	94.9685	353.03	158	Yes
289	A	48467521	48508920	C>T	p.A289V	Nonsynonymous	8	V	A	94.9685	353.03	158	Yes	Dipodomys ordii/Dipodomys spectabilis/Perognathus longimembris pacificus/Sapajus apella/Cebus imitator/Saimiri boliviensis boliviensis																											ENST00000422277.2:c.1031C>T	p.Ala344Val	p.A344V	1	LGG	low_grade_glioma	missense_variant	rs770518906	344
290	P	48467523-48467540	48508922-48508939	del	p.P290_A295del	Deletion	10		P	97.4843	361.248	158	Yes
290	P	48467524	48508923	C>T	p.P290L	Nonsynonymous	10	L	P	97.4843	361.248	158	Yes
290	P	48467525		A>G	p.P290P	Synonymous	10		P	97.4843	361.248	158	Yes
291	L	48467526		C>A	p.L291M	Nonsynonymous	11	M	L	100	377.888	159	Yes		p.L291M	COSM7394904	Substitution - Missense	TREX1_ENST00000625293	ENST00000625293.2	No	HCC1195	2776293	p.L291M	Lung	NS	NS	Carcinoma	Adenocarcinoma	NS	29681454	-	Variant of unknown origin	Unknown	Unknown	3:48467526..48467526	1	c.1036C>A	p.L346M	c.841C>A	p.L281M
292	G	48467530		G>A	p.G292D	Nonsynonymous	8	D	G	89.9371	352.977	159	Yes		p.G292D	COSM5864710	Substitution - Missense	TREX1_ENST00000625293	ENST00000625293.2	No	Pat_28_B	2513795	p.G292D	NS	NS	NS	Malignant melanoma	NS	NS	24265153	-	Confirmed Somatic	Tumour Sample	Unknown	3:48467530..48467530	1	c.1040G>A	p.G347D	c.845G>A	p.G282D
293	L	48467534		G>C	p.L293L	Synonymous	9		L	89.9371	365.513	159	Yes
293	L	48467532	48508931	C>G	p.L293V	Nonsynonymous	9	V	L	89.9371	365.513	159	Yes	Neosciurus carolinensis/Hipposideros armiger/Nomascus leucogenys/Eptesicus fuscus
294	L						11		L	100	377.888	159	Yes
295	A	48467540		C>T	p.A295A	Synonymous	8		A	91.195	357.167	159	Yes
296	I	48467543	48508942	C>T	p.I296I	Synonymous	7		F	70.4403	237.663	159	No																												ENST00000422277.2:c.1053C>T	p.Ile351=	p.I351=	1	COADREAD	colorectal	synonymous_variant	novel	351
297	L	48467544		C>T	p.L297L	Synonymous	10		L	97.4843	374.587	159	Yes
298	T	48467547	48508946	A>T	p.T298S	Nonsynonymous	10	S	T	98.1132	374.271	159	Yes	Mesocricetus auratus/Rhinolophus sinicus/Rhinolophus ferrumequinum
298	T	48467549		C>T	p.T298T	Synonymous	10		T	98.1132	374.271	159	Yes
299	L	48467550	48508949	T>G	p.L299V	Nonsynonymous	9	V	L	88.0503	361.862	159	Yes	Rousettus aegyptiacus/Chinchilla lanigera/Pteropus vampyrus/Pteropus giganteus/Pteropus alecto/Sturnira hondurensis/Artibeus jamaicensis/Desmodus rotundus/Phyllostomus discolor/Molossus molossus/Miniopterus natalensis/Myotis myotis/Myotis davidii/Eptesicus fuscus/Pipistrellus kuhlii/Rhinolophus sinicus/Rhinolophus ferrumequinum
300	A	48467554	48508953	C>T	p.A300V	Nonsynonymous	8	V	A	96.2264	361.893	159	Yes	Nannospalax galili/Cavia porcellus/Camelus dromedarius/Vicugna pacos/Camelus ferus/Condylura cristata
301	V	48467557	48508956	T>C	p.V301A	Nonsynonymous	9	A	V	56.6038	351.863	159	Yes		p.V301A	COSM8760509	Substitution - Missense	TREX1_ENST00000625293	ENST00000625293.2	No	TCGA-94-8490-01	2340065	p.V301A	Lung	NS	NS	Carcinoma	Squamous cell carcinoma	NS	-	418	Confirmed Somatic	Tumour Sample	Unknown	3:48467557..48467557	1	c.1067T>C	p.V356A	c.872T>C	p.V291A	ENST00000422277.2:c.1067T>C	p.Val356Ala	p.V356A	1	LUSC	lung_squamous_cell	missense_variant	novel	356
301	V	48467552-48467553	48508951-48508952	dup	p.V301fs	Frameshift	9		V	56.6038	351.863	159	Yes
302	A	48467559		G>T	p.A302S	Nonsynonymous	11	S	A	100	377.888	159	Yes
303	T	48467563	48508962	C>T	p.T303I	Nonsynonymous	7	I	T	74.8428	266.554	159	Yes	Arvicola amphibius/Myodes glareolus/Peromyscus leucopus/Peromyscus maniculatus bairdii/Onychomys torridus/Grammomys surdaster/Meriones unguiculatus/Arvicanthis niloticus/Mastomys coucha/Condylura cristata
303	T	48467562	48508961	A>C	p.T303P	Nonsynonymous	7	P	T	74.8428	266.554	159	Yes
304	L	48467561-48467562	48508960-48508961	del	p.L304fs	Frameshift	11		L	100	377.888	159	Yes
304	L	48467562-48467565	48508961-48508964	dup	p.L304Hfs*22	Frameshift+Stop_gained	11		L	100	377.888	159	Yes
304	L	48467567	48508966	G>A	p.L304L	Synonymous	11		L	100	377.888	159	Yes
305	Y	48467569	48508968	A>G	p.Y305C	Nonsynonymous	11	C	Y	100	377.888	159	Yes
305	Y	48467570		T>C	p.Y305Y	Synonymous	11		Y	100	377.888	159	Yes
305	Y	48467566-48467569	48508965-48508968	del	p305fs	Frameshift	11		Y	100	377.888	159	No
306	G	48467571	48508970	G>T	p.G306*	Stop_gained	4		G	90.566	328.449	159	Yes		p.G306*	COSM7875599	Substitution - Nonsense	TREX1_ENST00000625293	ENST00000625293.2	No	TCGA-EE-A2MD-06	2121676	p.G306*	Skin	NS	NS	Malignant melanoma	NS	NS	-	540	Confirmed Somatic	Unknown	Unknown	3:48467571..48467571	1	c.1081G>T	p.G361*	c.886G>T	p.G296*	ENST00000422277.2:c.1081G>T	p.Gly361Ter	p.G361*	1	SKCM	melanoma	stop_gained	novel	361
306	G	48467572	48508971	G>C	p.G306A	Nonsynonymous	4	A	G	90.566	328.449	159	Yes	Pteropus vampyrus/Pteropus giganteus/Pteropus alecto
306	G	48467572	48508971	G>A	p.G306E	Nonsynonymous	4	E	G	90.566	328.449	159	Yes	Ochotona princeps/Ochotona curzoniae	p.G306E	COSM8270643	Substitution - Missense	TREX1_ENST00000625293	ENST00000625293.2	No	TCGA-CX-7085-01	2193569	p.G306E	Upper aerodigestive tract	Head neck	NS	Carcinoma	Squamous cell carcinoma	NS	-	627	Confirmed Somatic	Unknown	Unknown	3:48467572..48467572	1	c.1082G>A	p.G361E	c.887G>A	p.G296E	ENST00000422277.2:c.1082G>A	p.Gly361Glu	p.G361E	1	HNSC	head_and_neck	missense_variant	rs780022923	361
306	G	48467571	48508970	G>A	p.G306R	Nonsynonymous	4	R	G	90.566	328.449	159	Yes	Perognathus longimembris pacificus/Lipotes vexillifer/Balaenoptera acutorostrata scammoni/Balaenoptera musculus/Orcinus orca/Lagenorhynchus obliquidens/Tursiops truncatus/Delphinapterus leucas/Neophocaena asiaeorientalis asiaeorientalis/Condylura cristata
307	L						10		L	96.8554	368.262	159	Yes
308	S	48467578	48508977	C>G	p.S308C	Nonsynonymous	5	C	S	79.2453	186.271	159	Yes
308	S	48467579	48508978	C>A	p.S308S	Synonymous	5		S	79.2453	186.271	159	Yes																												ENST00000422277.2:c.1089C>A	p.Ser363=	p.S363=	1	SKCM	melanoma	synonymous_variant	novel	363
309	L	48467580		C>T	p.L309L	Synonymous	10		L	93.7107	330.344	159	Yes
310	A						8		A	86.7925	322.841	159	Yes
311	T						5		T	54.0881	228.544	159	Yes
312	P	48467589	48508988	C>G	p.P312A	Nonsynonymous	10	A	P	97.4843	363.049	159	Yes
312	P	48467590	48508989	C>T	p.P312L	Nonsynonymous	10	L	P	97.4843	363.049	159	Yes	Myotis davidii	p.P312L	COSM3594916	Substitution - Missense	TREX1_ENST00000625293	ENST00000625293.2	No	TCGA-FW-A3TU-06	2121784	p.P312L	Skin	NS	NS	Malignant melanoma	NS	NS	-	540	Confirmed Somatic	Unknown	Unknown	3:48467590..48467590	1	c.1100C>T	p.P367L	c.905C>T	p.P302L	ENST00000422277.2:c.1100C>T	p.Pro367Leu	p.P367L	1	SKCM	melanoma	missense_variant	rs772805032	367
312	P	48467590	48508989	C>G	p.P312R	Nonsynonymous	10	R	P	97.4843	363.049	159	Yes
313	G						4		G	89.9371	322.361	159	Yes
314	E						8		Q	76.7296	301.083	156	No
[truncated: 127 more columns]
