# Supplementary material for: Prevalence and impact of molecular variation in the three-prime repair exonuclease 1 TREX1 and its implications for oncology
Source: Hum Genomics. 2025 Jun 28;19:73. doi: 10.1186/s40246-025-00785-y (PMC12206365; doi:10.1186/s40246-025-00785-y)
Supplement: Supplementary file 12 — Additional file 12. Table S9. List of TREX1 DNA sequence variants with copy number alteration information in TCGA samples. [file 40246_2025_785_MOESM12_ESM.xlsx]

## Sheet: Table_S9
Table S9. List of TREX1 DNA sequence variants with copy number alteration information in TCGA samples
HGVSp_Short and HGVSp, protein sequence positions of protein changes provided according to the TREX1a isoform, as reported by TCGA.
TREX1b_variants, protein sequence positions of protein changes provided according to the TREX1b isoform.
NA, no CNA information.
	TCGA_study	Primary_Tissue	Hugo_Symbol	Entrez_Gene_Id	Center	NCBI_Build	Chromosome	Start_Position	End_Position	Strand	Consequence	Variant_Classification	Variant_Type	Reference_Allele	Tumor_Seq_Allele1	Tumor_Seq_Allele2	dbSNP_RS	dbSNP_Val_Status	Tumor_Sample_Barcode	TEST	CNA	Matched_Norm_Sample_Barcode	Match_Norm_Seq_Allele1	Match_Norm_Seq_Allele2	Tumor_Validation_Allele1	Tumor_Validation_Allele2	Match_Norm_Validation_Allele1	Match_Norm_Validation_Allele2	Verification_Status	Validation_Status	Mutation_Status	Sequencing_Phase	Sequence_Source	Validation_Method	Score	BAM_File	Sequencer	t_ref_count	t_alt_count	n_ref_count	n_alt_count	HGVSc	HGVSp	HGVSp_Short	TREX1b_variants	Transcript_ID	RefSeq	Protein_position	Codons
1	BLCA	bladder	TREX1	11277	.	GRCh37	3	48507833	48507833	+	5_prime_UTR_variant	5'UTR	SNP	G	G	C	rs538072940	.	TCGA-UY-A9PH-01	BLCA_ENST00000422277.2:c.-57G>C	1	TCGA-UY-A9PH-10	G	G	.	.	.	.	.	.	.	.	.	.	.	.	.	20	5	36		ENST00000422277.2:c.-57G>C		p.*19*		ENST00000422277	NM_016381.4
2	BLCA	bladder	TREX1	11277	.	GRCh37	3	48507909	48507909	+	missense_variant	Missense_Mutation	SNP	G	G	A	rs760207170	.	TCGA-E7-A7DV-01	BLCA_ENST00000422277.2:c.20G>A	-1	TCGA-E7-A7DV-10	G	G	.	.	.	.	.	.	.	.	.	.	.	.	.	54	6	83		ENST00000422277.2:c.20G>A	p.Arg7Lys	p.R7K		ENST00000422277	NM_016381.4	7	aGa/aAa
3	BLCA	bladder	TREX1	11277	.	GRCh37	3	48507918	48507918	+	missense_variant	Missense_Mutation	SNP	G	G	C	novel	.	TCGA-E7-A7DV-01	BLCA_ENST00000422277.2:c.29G>C	-1	TCGA-E7-A7DV-10	G	G	.	.	.	.	.	.	.	.	.	.	.	.	.	56	6	94		ENST00000422277.2:c.29G>C	p.Arg10Thr	p.R10T		ENST00000422277	NM_016381.4	10	aGg/aCg
4	BLCA	bladder	TREX1	11277	.	GRCh37	3	48508139	48508139	+	missense_variant	Missense_Mutation	SNP	C	C	T	rs1407557314	.	TCGA-YC-A89H-01	BLCA_ENST00000422277.2:c.250C>T	0	TCGA-YC-A89H-10	C	C	.	.	.	.	.	.	.	.	.	.	.	.	.	70	22	134		ENST00000422277.2:c.250C>T	p.Pro84Ser	p.P84S	p.P29S	ENST00000422277	NM_016381.4	84	Ccc/Tcc
5	BLCA	bladder	TREX1	11277	.	GRCh37	3	48508256	48508256	+	missense_variant	Missense_Mutation	SNP	T	T	G	novel	.	TCGA-E7-A6MD-01	BLCA_ENST00000422277.2:c.367T>G	0	TCGA-E7-A6MD-10	T	T	.	.	.	.	.	.	.	.	.	.	.	.	.	114	37	137		ENST00000422277.2:c.367T>G	p.Ser123Ala	p.S123A	p.S68A	ENST00000422277	NM_016381.4	123	Tcc/Gcc
6	BLCA	bladder	TREX1	11277	.	GRCh37	3	48508315	48508315	+	synonymous_variant	Silent	SNP	G	G	C	.	.	TCGA-E7-A7DV-01	BLCA_ENST00000422277.2:c.426G>C	-1	TCGA-E7-A7DV-10	G	G	.	.	.	.	.	.	.	.	.	.	.	.	.	68	14	91		ENST00000422277.2:c.426G>C	p.Leu142=	p.L142=	p.L87=	ENST00000422277	NM_016381.4	142	ctG/ctC
7	BLCA	bladder	TREX1	11277	.	GRCh37	3	48508355	48508355	+	missense_variant	Missense_Mutation	SNP	G	G	C	novel	.	TCGA-SY-A9G5-01	BLCA_ENST00000422277.2:c.466G>C	-1	TCGA-SY-A9G5-10	G	G	.	.	.	.	.	.	.	.	.	.	.	.	.	45	26	101		ENST00000422277.2:c.466G>C	p.Asp156His	p.D156H	p.D101H	ENST00000422277	NM_016381.4	156	Gat/Cat
8	BLCA	bladder	TREX1	11277	.	GRCh37	3	48508421	48508421	+	missense_variant	Missense_Mutation	SNP	G	G	C	novel	.	TCGA-UY-A9PF-01	BLCA_ENST00000422277.2:c.532G>C	0	TCGA-UY-A9PF-10	G	G	.	.	.	.	.	.	.	.	.	.	.	.	.	62	12	85		ENST00000422277.2:c.532G>C	p.Ala178Pro	p.A178P	p.A123P	ENST00000422277	NM_016381.4	178	Gca/Cca
9	BLCA	bladder	TREX1	11277	.	GRCh37	3	48508545	48508545	+	missense_variant	Missense_Mutation	SNP	G	G	A	rs143885312	.	TCGA-MV-A51V-01	BLCA_ENST00000422277.2:c.656G>A	0	TCGA-MV-A51V-10	G	G	.	.	.	.	.	.	.	.	.	.	.	.	.	82	9	55		ENST00000422277.2:c.656G>A	p.Arg219Gln	p.R219Q	p.R164Q	ENST00000422277	NM_016381.4	219	cGa/cAa
10	BLCA	bladder	TREX1	11277	.	GRCh37	3	48508579	48508579	+	missense_variant	Missense_Mutation	SNP	G	G	C	novel	.	TCGA-E7-A7DV-01	BLCA_ENST00000422277.2:c.690G>C	-1	TCGA-E7-A7DV-10	G	G	.	.	.	.	.	.	.	.	.	.	.	.	.	21	11	43		ENST00000422277.2:c.690G>C	p.Lys230Asn	p.K230N	p.K175N	ENST00000422277	NM_016381.4	230	aaG/aaC
11	BLCA	bladder	TREX1	11277	.	GRCh37	3	48508893	48508893	+	missense_variant	Missense_Mutation	SNP	G	G	T	novel	.	TCGA-E7-A7DV-01	BLCA_ENST00000422277.2:c.1004G>T	-1	TCGA-E7-A7DV-10	G	G	.	.	.	.	.	.	.	.	.	.	.	.	.	43	10	73		ENST00000422277.2:c.1004G>T	p.Gly335Val	p.G335V	p.G280V	ENST00000422277	NM_016381.4	335	gGa/gTa
12	BRCA	breast	TREX1	11277	.	GRCh37	3	48508355	48508355	+	missense_variant	Missense_Mutation	SNP	G	G	A	novel	.	TCGA-3C-AALI-01	BRCA_ENST00000422277.2:c.466G>A	-1	TCGA-3C-AALI-10	G	G	.	.	.	.	.	.	.	.	.	.	.	.	.	8	21	17	0	ENST00000422277.2:c.466G>A	p.Asp156Asn	p.D156N	p.D101N	ENST00000422277	NM_016381.4	156	Gat/Aat
13	COADREAD	colorectal	TREX1	11277	.	GRCh37	3	48507887	48507887	+	5_prime_UTR_variant	5'UTR	DEL	A	A	-	novel	.	TCGA-CK-6746-01	COADREAD_ENST00000422277.2:c.1del	0	TCGA-CK-6746-10	A	A	.	.	.	.	.	.	.	.	.	.	.	.	.	85	37	81	0	ENST00000422277.2:c.1del		p.*1*		ENST00000422277	NM_016381.4
14	COADREAD	colorectal	TREX1	11277	.	GRCh37	3	48507956	48507956	+	missense_variant	Missense_Mutation	SNP	C	C	G	rs371026419	.	TCGA-G4-6586-01	COADREAD_ENST00000422277.2:c.67C>G	0	TCGA-G4-6586-10	C	C	.	.	.	.	.	.	.	.	.	.	.	.	.	127	70	232	0	ENST00000422277.2:c.67C>G	p.Pro23Ala	p.P23A		ENST00000422277	NM_016381.4	23	Ccc/Gcc
15	COADREAD	colorectal	TREX1	11277	.	GRCh37	3	48508942	48508942	+	synonymous_variant	Silent	SNP	C	C	T	novel	.	TCGA-A6-4105-01	COADREAD_ENST00000422277.2:c.1053C>T	-1	TCGA-A6-4105-10	C	C	.	.	.	.	.	.	.	.	.	.	.	.	.	55	24	69	0	ENST00000422277.2:c.1053C>T	p.Ile351=	p.I351=	p.I296=	ENST00000422277	NM_016381.4	351	atC/atT
16	COADREAD	colorectal	TREX1	11277	.	GRCh37	3	48509033	48509033	+	3_prime_UTR_variant	3'UTR	SNP	C	C	T	rs897187789	.	TCGA-CK-5916-01	COADREAD_ENST00000422277.2:c.*34C>T	0	TCGA-CK-5916-10	C	C	.	.	.	.	.	.	.	.	.	.	.	.	.	162	83	274	0	ENST00000422277.2:c.*34C>T				ENST00000422277	NM_016381.4
17	ESCA	esophagus	TREX1	11277	.	GRCh37	3	48508870	48508870	+	synonymous_variant	Silent	SNP	T	T	C	novel	.	TCGA-LN-A7HV-01	ESCA_ENST00000422277.2:c.981T>C	-1	TCGA-LN-A7HV-10	T	T	.	.	.	.	.	.	.	.	.	.	.	.	.	11	6	56	0	ENST00000422277.2:c.981T>C	p.Asp327=	p.D327=	p.D272=	ENST00000422277	NM_016381.4	327	gaT/gaC
18	GBM	glioblastoma	TREX1	11277	.	GRCh37	3	48508196	48508196	+	missense_variant	Missense_Mutation	SNP	C	C	T	rs754776272	.	TCGA-14-0866-01	GBM_ENST00000422277.2:c.307C>T	0	TCGA-14-0866-10	C	C	.	.	.	.	.	.	.	.	.	.	.	.	.	38	18	31	0	ENST00000422277.2:c.307C>T	p.Pro103Ser	p.P103S	p.P48S	ENST00000422277	NM_016381.4	103	Ccc/Tcc
19	HNSC	head_and_neck	TREX1	11277	.	GRCh37	3	48507918	48507918	+	missense_variant	Missense_Mutation	SNP	G	G	C	novel	.	TCGA-P3-A6SW-01	HNSC_ENST00000422277.2:c.29G>C	0	TCGA-P3-A6SW-10	G	G	.	.	.	.	.	.	.	.	.	.	.	.	.	53	7	82	0	ENST00000422277.2:c.29G>C	p.Arg10Thr	p.R10T		ENST00000422277	NM_016381.4	10	aGg/aCg
20	HNSC	head_and_neck	TREX1	11277	.	GRCh37	3	48508760	48508760	+	missense_variant	Missense_Mutation	SNP	A	A	G	.	.	TCGA-F7-A624-01	HNSC_ENST00000422277.2:c.871A>G	0	TCGA-F7-A624-10	A	A	.	.	.	.	.	.	.	.	.	.	.	.	.	97	29	116	0	ENST00000422277.2:c.871A>G	p.Thr291Ala	p.T291A	p.T236A	ENST00000422277	NM_016381.4	291	Aca/Gca
21	HNSC	head_and_neck	TREX1	11277	.	GRCh37	3	48508971	48508971	+	missense_variant	Missense_Mutation	SNP	G	G	A	rs780022923	.	TCGA-CX-7085-01	HNSC_ENST00000422277.2:c.1082G>A	0	TCGA-CX-7085-10	G	G	.	.	.	.	.	.	.	.	.	.	.	.	.	61	6	84	0	ENST00000422277.2:c.1082G>A	p.Gly361Glu	p.G361E	p.G306E	ENST00000422277	NM_016381.4	361	gGa/gAa
22	HNSC	head_and_neck	TREX1	11277	.	GRCh37	3	48507992	48507993	+	frameshift_variant	Frame_Shift_Del	DEL	CT	CT	-	novel	.	TCGA-BA-5149-01	HNSC_ENST00000422277.2:c.103_104del	-1	TCGA-BA-5149-10	CT	CT	.	.	.	.	.	.	.	.	.	.	.	.	.	201	109	268	0	ENST00000422277.2:c.103_104del	p.Leu35GlyfsTer121	p.L35Gfs*121		ENST00000422277	NM_016381.4	35	CTg/g
23	KIRC	kidney_clear_cell	TREX1	11277	.	GRCh37	3	48508682	48508682	+	missense_variant	Missense_Mutation	SNP	T	T	C	rs770775387	.	TCGA-CJ-5682-01	KIRC_ENST00000422277.2:c.793T>C	-1	TCGA-CJ-5682-11	T	T	.	.	.	.	.	.	.	.	.	.	.	.	.	17	24	25	0	ENST00000422277.2:c.793T>C	p.Trp265Arg	p.W265R	p.W210R	ENST00000422277	NM_016381.4	265	Tgg/Cgg
24	KIRP	kidney_papillary_cell	TREX1	11277	.	GRCh37	3	48507663	48507663	+	5_prime_UTR_variant	5'UTR	SNP	A	A	T	novel	.	TCGA-UZ-A9PK-01	KIRP_ENST00000422277.2:c.-227A>T	1	TCGA-UZ-A9PK-10	A	A	.	.	.	.	.	.	.	.	.	.	.	.	.	11	9	15	0	ENST00000422277.2:c.-227A>T		p.*76*	p.*21*	ENST00000422277	NM_016381.4
25	KIRP	kidney_papillary_cell	TREX1	11277	.	GRCh37	3	48508760	48508760	+	missense_variant	Missense_Mutation	SNP	A	A	T	.	.	TCGA-A4-7585-01	KIRP_ENST00000422277.2:c.871A>T	0	TCGA-A4-7585-11	A	A	.	.	.	.	.	.	.	.	.	.	.	.	.	75	10	91	0	ENST00000422277.2:c.871A>T	p.Thr291Ser	p.T291S	p.T236S	ENST00000422277	NM_016381.4	291	Aca/Tca
26	LGG	low_grade_glioma	TREX1	11277	.	GRCh37	3	48508920	48508920	+	missense_variant	Missense_Mutation	SNP	C	C	T	rs770518906	.	TCGA-DU-6392-01	LGG_ENST00000422277.2:c.1031C>T	0	TCGA-DU-6392-10	C	C	.	.	.	.	.	.	.	.	.	.	.	.	.	33	30	86	0	ENST00000422277.2:c.1031C>T	p.Ala344Val	p.A344V	p.A289V	ENST00000422277	NM_016381.4	344	gCc/gTc
27	LGG	low_grade_glioma	TREX1	11277	.	GRCh37	3	48508260	48508261	+	frameshift_variant	Frame_Shift_Del	DEL	TG	TG	-	rs74689946	.	TCGA-P5-A5ET-01	LGG_ENST00000422277.2:c.377_378del	0	TCGA-P5-A5ET-10	TG	TG	.	.	.	.	.	.	.	.	.	.	.	.	.	176	74	176	0	ENST00000422277.2:c.377_378del	p.Val126GlyfsTer30	p.V126Gfs*30	p.V71Gfs*30	ENST00000422277	NM_016381.4	124	cTG/c
28	LIHC	liver	TREX1	11277	.	GRCh37	3	48508185	48508185	+	missense_variant	Missense_Mutation	SNP	T	T	C	novel	.	TCGA-DD-A4NJ-01	LIHC_ENST00000422277.2:c.296T>C	0	TCGA-DD-A4NJ-10	T	T	.	.	.	.	.	.	.	.	.	.	.	.	.	131	59	159	1	ENST00000422277.2:c.296T>C	p.Leu99Pro	p.L99P	p.L44P	ENST00000422277	NM_016381.4	99	cTg/cCg
29	LIHC	liver	TREX1	11277	.	GRCh37	3	48508185	48508185	+	missense_variant	Missense_Mutation	SNP	T	T	C	novel	.	TCGA-DD-A4NJ-01	LIHC_ENST00000422277.2:c.296T>C	0	TCGA-DD-A4NJ-11	T	T	.	.	.	.	.	.	.	.	.	.	.	.	.	130	59	121	0	ENST00000422277.2:c.296T>C	p.Leu99Pro	p.L99P	p.L44P	ENST00000422277	NM_016381.4	99	cTg/cCg
30	LUAD	lung_adenocarcinoma	TREX1	11277	.	GRCh37	3	48507854	48507854	+	5_prime_UTR_variant	5'UTR	SNP	G	G	A	novel	.	TCGA-55-A4DF-01	LUAD_ENST00000422277.2:c.-36G>A	-1	TCGA-55-A4DF-10	G	G	.	.	.	.	.	.	.	.	.	.	.	.	.	41	10	54	0	ENST00000422277.2:c.-36G>A		p.*12*		ENST00000422277	NM_016381.4
31	LUAD	lung_adenocarcinoma	TREX1	11277	.	GRCh37	3	48508518	48508518	+	missense_variant	Missense_Mutation	SNP	G	G	C	.	.	TCGA-67-3771-01	LUAD_ENST00000422277.2:c.629G>C	-1	TCGA-67-3771-10	G	G	.	.	.	.	.	.	.	.	.	.	.	.	.	63	10	198	0	ENST00000422277.2:c.629G>C	p.Ser210Thr	p.S210T	p.S155T	ENST00000422277	NM_016381.4	210	aGc/aCc
32	LUSC	lung_squamous_cell	TREX1	11277	.	GRCh37	3	48508340	48508340	+	missense_variant	Missense_Mutation	SNP	G	G	T	novel	.	TCGA-66-2754-01	LUSC_ENST00000422277.2:c.451G>T	-1	TCGA-66-2754-11	G	G	.	.	.	.	.	.	.	.	.	.	.	.	.	30	3	64	0	ENST00000422277.2:c.451G>T	p.Gly151Trp	p.G151W	p.G96W	ENST00000422277	NM_016381.4	151	Ggg/Tgg
33	LUSC	lung_squamous_cell	TREX1	11277	.	GRCh37	3	48508956	48508956	+	missense_variant	Missense_Mutation	SNP	T	T	C	novel	.	TCGA-94-8490-01	LUSC_ENST00000422277.2:c.1067T>C	-1	TCGA-94-8490-10	T	T	.	.	.	.	.	.	.	.	.	.	.	.	.	105	9	89	0	ENST00000422277.2:c.1067T>C	p.Val356Ala	p.V356A	p.V301A	ENST00000422277	NM_016381.4	356	gTa/gCa
34	LUSC	lung_squamous_cell	TREX1	11277	.	GRCh37	3	48509000	48509000	+	3_prime_UTR_variant	3'UTR	SNP	G	G	T	novel	.	TCGA-98-8023-01	LUSC_ENST00000422277.2:c.*1G>T	0	TCGA-98-8023-10	G	G	.	.	.	.	.	.	.	.	.	.	.	.	.	42	18	58	0	ENST00000422277.2:c.*1G>T				ENST00000422277	NM_016381.4
35	PAAD	pancreas	TREX1	11277	.	GRCh37	3	48508064	48508064	+	stop_gained	Nonsense_Mutation	SNP	C	C	T	novel	.	TCGA-HZ-7289-01	PAAD_ENST00000422277.2:c.175C>T	0	TCGA-HZ-7289-10	C	C	.	.	.	.	.	.	.	.	.	.	.	.	.	827	166	265	0	ENST00000422277.2:c.175C>T	p.Gln59Ter	p.Q59*	p.Q4*	ENST00000422277	NM_016381.4	59	Cag/Tag
36	PAAD	pancreas	TREX1	11277	.	GRCh37	3	48508597	48508597	+	synonymous_variant	Silent	SNP	C	C	T	rs948439253	.	TCGA-IB-7651-01	PAAD_ENST00000422277.2:c.708C>T	0	TCGA-IB-7651-10	C	C	.	.	.	.	.	.	.	.	.	.	.	.	.	235	51	54	0	ENST00000422277.2:c.708C>T	p.Ser236=	p.S236=	p.S181=	ENST00000422277	NM_016381.4	236	agC/agT
37	SKCM	melanoma	TREX1	11277	.	GRCh37	3	48507820	48507820	+	5_prime_UTR_variant	5'UTR	SNP	C	C	T	novel	.	TCGA-EE-A2MR-06	SKCM_ENST00000422277.2:c.-70C>T	0	TCGA-EE-A2MR-10	C	C	.	.	.	.	.	.	.	.	.	.	.	.	.	16	5	23	0	ENST00000422277.2:c.-70C>T		p.*24*		ENST00000422277	NM_016381.4
38	SKCM	melanoma	TREX1	11277	.	GRCh37	3	48507853	48507853	+	5_prime_UTR_variant	5'UTR	SNP	G	G	A	rs769025334	.	TCGA-EE-A29H-06	SKCM_ENST00000422277.2:c.-37G>A	2	TCGA-EE-A29H-10	G	G	.	.	.	.	.	.	.	.	.	.	.	.	.	40	15	29	0	ENST00000422277.2:c.-37G>A		p.*13*		ENST00000422277	NM_016381.4
39	SKCM	melanoma	TREX1	11277	.	GRCh37	3	48508522	48508522	+	synonymous_variant	Silent	SNP	C	C	T	novel	.	TCGA-GF-A6C9-06	SKCM_ENST00000422277.2:c.633C>T	-1	TCGA-GF-A6C9-10	C	C	.	.	.	.	.	.	.	.	.	.	.	.	.	60	10	113	0	ENST00000422277.2:c.633C>T	p.Ile211=	p.I211=	p.I156=	ENST00000422277	NM_016381.4	211	atC/atT
40	SKCM	melanoma	TREX1	11277	.	GRCh37	3	48508579	48508579	+	missense_variant	Missense_Mutation	SNP	G	G	T	novel	.	TCGA-ER-A19Q-06	SKCM_ENST00000422277.2:c.690G>T	0	TCGA-ER-A19Q-10	G	G	.	.	.	.	.	.	.	.	.	.	.	.	.	21	3	39	0	ENST00000422277.2:c.690G>T	p.Lys230Asn	p.K230N	p.K175N	ENST00000422277	NM_016381.4	230	aaG/aaT
41	SKCM	melanoma	TREX1	11277	.	GRCh37	3	48508625	48508625	+	missense_variant	Missense_Mutation	SNP	C	C	A	rs750738235	.	TCGA-D3-A1Q3-06	SKCM_ENST00000422277.2:c.736C>A	0	TCGA-D3-A1Q3-10	C	C	.	.	.	.	.	.	.	.	.	.	.	.	.	30	3	38	0	ENST00000422277.2:c.736C>A	p.Pro246Thr	p.P246T	p.P191T	ENST00000422277	NM_016381.4	246	Cct/Act
42	SKCM	melanoma	TREX1	11277	.	GRCh37	3	48508707	48508707	+	missense_variant	Missense_Mutation	SNP	G	G	T	novel	.	TCGA-D3-A3C6-06	SKCM_ENST00000422277.2:c.818G>T	-1	TCGA-D3-A3C6-10	G	G	.	.	.	.	.	.	.	.	.	.	.	.	.	23	3	55	0	ENST00000422277.2:c.818G>T	p.Trp273Leu	p.W273L	p.W218L	ENST00000422277	NM_016381.4	273	tGg/tTg
43	SKCM	melanoma	TREX1	11277	.	GRCh37	3	48508738	48508738	+	synonymous_variant	Silent	SNP	C	C	A	novel	.	TCGA-FS-A1ZN-01	SKCM_ENST00000422277.2:c.849C>A	NA	TCGA-FS-A1ZN-10	C	C	.	.	.	.	.	.	.	.	.	.	.	.	.	43	5	41	0	ENST00000422277.2:c.849C>A	p.Thr283=	p.T283=	p.T228=	ENST00000422277	NM_016381.4	283	acC/acA
44	SKCM	melanoma	TREX1	11277	.	GRCh37	3	48508970	48508970	+	stop_gained	Nonsense_Mutation	SNP	G	G	T	novel	.	TCGA-EE-A2MD-06	SKCM_ENST00000422277.2:c.1081G>T	-1	TCGA-EE-A2MD-10	G	G	.	.	.	.	.	.	.	.	.	.	.	.	.	21	3	68	0	ENST00000422277.2:c.1081G>T	p.Gly361Ter	p.G361*	p.G306*	ENST00000422277	NM_016381.4	361	Gga/Tga
45	SKCM	melanoma	TREX1	11277	.	GRCh37	3	48508978	48508978	+	synonymous_variant	Silent	SNP	C	C	A	novel	.	TCGA-D3-A2JB-06	SKCM_ENST00000422277.2:c.1089C>A	0	TCGA-D3-A2JB-10	C	C	.	.	.	.	.	.	.	.	.	.	.	.	.	83	8	59	0	ENST00000422277.2:c.1089C>A	p.Ser363=	p.S363=	p.S308=	ENST00000422277	NM_016381.4	363	tcC/tcA
46	SKCM	melanoma	TREX1	11277	.	GRCh37	3	48508989	48508989	+	missense_variant	Missense_Mutation	SNP	C	C	T	rs772805032	.	TCGA-FW-A3TU-06	SKCM_ENST00000422277.2:c.1100C>T	-1	TCGA-FW-A3TU-10	C	C	.	.	.	.	.	.	.	.	.	.	.	.	.	23	22	77	0	ENST00000422277.2:c.1100C>T	p.Pro367Leu	p.P367L	p.P312L	ENST00000422277	NM_016381.4	367	cCt/cTt
47	STAD	stomach	TREX1	11277	.	GRCh37	3	48507756	48507756	+	5_prime_UTR_variant	5'UTR	SNP	G	G	T	novel	.	TCGA-BR-8487-01	STAD_ENST00000422277.2:c.-134G>T	0	TCGA-BR-8487-10	G	G	.	.	.	.	.	.	.	.	.	.	.	.	.	10	6	14	0	ENST00000422277.2:c.-134G>T		p.*45*		ENST00000422277	NM_016381.4
48	STAD	stomach	TREX1	11277	.	GRCh37	3	48508122	48508122	+	missense_variant	Missense_Mutation	SNP	G	G	A	novel	.	TCGA-SW-A7EA-01	STAD_ENST00000422277.2:c.233G>A	0	TCGA-SW-A7EA-10	G	G	.	.	.	.	.	.	.	.	.	.	.	.	.	105	31	132	0	ENST00000422277.2:c.233G>A	p.Gly78Asp	p.G78D	p.G23D	ENST00000422277	NM_016381.4	78	gGc/gAc
49	STAD	stomach	TREX1	11277	.	GRCh37	3	48508192	48508192	+	frameshift_variant	Frame_Shift_Del	DEL	C	C	-	rs748914604	.	TCGA-CG-4305-01	STAD_ENST00000422277.2:c.309del	0	TCGA-CG-4305-10	C	C	.	.	.	.	.	.	.	.	.	.	.	.	.	95	31	105	0	ENST00000422277.2:c.309del	p.Thr104ProfsTer16	p.T104Pfs*16	p.T49Pfs*16	ENST00000422277	NM_016381.4	101	agC/ag
50	STAD	stomach	TREX1	11277	.	GRCh37	3	48508447	48508447	+	frameshift_variant	Frame_Shift_Del	DEL	C	C	-	rs78762691	.	TCGA-CG-4305-01	STAD_ENST00000422277.2:c.562del	0	TCGA-CG-4305-10	C	C	.	.	.	.	.	.	.	.	.	.	.	.	.	59	11	79	0	ENST00000422277.2:c.562del	p.Leu188CysfsTer27	p.L188Cfs*27	p.L133Cfs*27	ENST00000422277	NM_016381.4	186	ttC/tt
51	STAD	stomach	TREX1	11277	.	GRCh37	3	48508191	48508192	+	frameshift_variant	Frame_Shift_Ins	INS	-	-	C	rs748914604	.	TCGA-CG-4442-01	STAD_ENST00000422277.2:c.309dup	0	TCGA-CG-4442-10	-	-	.	.	.	.	.	.	.	.	.	.	.	.	.	158	69	182	0	ENST00000422277.2:c.309dup	p.Thr104HisfsTer53	p.T104Hfs*53	p.T49Hfs*53	ENST00000422277	NM_016381.4	101	agc/agCc
52	TGCT	testicular	TREX1	11277	.	GRCh37	3	48508121	48508121	+	missense_variant	Missense_Mutation	SNP	G	G	A	novel	.	TCGA-WZ-A7V5-01	TGCT_ENST00000422277.2:c.232G>A	-1	TCGA-WZ-A7V5-10	G	G	.	.	.	.	.	.	.	.	.	.	.	.	.	108	9	105	0	ENST00000422277.2:c.232G>A	p.Gly78Ser	p.G78S	p.G23S	ENST00000422277	NM_016381.4	78	Ggc/Agc
53	TGCT	testicular	TREX1	11277	.	GRCh37	3	48508314	48508314	+	missense_variant	Missense_Mutation	SNP	T	T	C	novel	.	TCGA-X3-A8G4-01	TGCT_ENST00000422277.2:c.425T>C	1	TCGA-X3-A8G4-10	T	T	.	.	.	.	.	.	.	.	.	.	.	.	.	53	6	43	0	ENST00000422277.2:c.425T>C	p.Leu142Pro	p.L142P	p.L87P	ENST00000422277	NM_016381.4	142	cTg/cCg
54	UCEC	endometrial	TREX1	11277	.	GRCh37	3	48507968	48507968	+	missense_variant	Missense_Mutation	SNP	C	C	A	rs749371002	.	TCGA-DF-A2KU-01	UCEC_ENST00000422277.2:c.79C>A	0	TCGA-DF-A2KU-10	C	C	.	.	.	.	.	.	.	.	.	.	.	.	.	13	13	14	0	ENST00000422277.2:c.79C>A	p.Leu27Ile	p.L27I		ENST00000422277	NM_016381.4	27	Ctc/Atc
55	UCEC	endometrial	TREX1	11277	.	GRCh37	3	48508195	48508195	+	synonymous_variant	Silent	SNP	C	C	T	novel	.	TCGA-FI-A2D0-01	UCEC_ENST00000422277.2:c.306C>T	0	TCGA-FI-A2D0-10	C	C	.	.	.	.	.	.	.	.	.	.	.	.	.	20	9	34	0	ENST00000422277.2:c.306C>T	p.Pro102=	p.P102=	p.P47=	ENST00000422277	NM_016381.4	102	ccC/ccT
56	UCEC	endometrial	TREX1	11277	.	GRCh37	3	48508612	48508612	+	synonymous_variant	Silent	SNP	G	G	A	novel	.	TCGA-B5-A1MX-01	UCEC_ENST00000422277.2:c.723G>A	0	TCGA-B5-A1MX-10	G	G	.	.	.	.	.	.	.	.	.	.	.	.	.	9	3	26	0	ENST00000422277.2:c.723G>A	p.Leu241=	p.L241=	p.L186=	ENST00000422277	NM_016381.4	241	ctG/ctA
[truncated: 68 more columns]
