# Supplementary material for: Prevalence and impact of molecular variation in the three-prime repair exonuclease 1 TREX1 and its implications for oncology
Source: Hum Genomics. 2025 Jun 28;19:73. doi: 10.1186/s40246-025-00785-y (PMC12206365; doi:10.1186/s40246-025-00785-y)
Supplement: Supplementary file 13 — Additional file 13. Table S10. TREX1b protein positions which were included in the modeling analysis. [file 40246_2025_785_MOESM13_ESM.xlsx]

## Sheet: Table_S10
Table S10. TREX1b protein positions which were included in the modeling analysis
Each corresponding TREX1b position was altered in cancer samples, cancer cell lines, or cancer-derived organoids based on TCGA and COSMIC data. Listed are protein variants reported autoimmune disease, cancer, or both, which were included in the modeling analysis.
AGS1, Aicardi–Goutières syndrome 1
RCVL, retinal vasculopathy with cerebral leukodystrophy
CL1, Chiblain lupus 1
TREX1b position	AA	location GRCh38	DNA change	AA change	Disease	Database	Placental conservation	Placental consensus	Placental consensus support	Human same as consensus	Placental occupancy	ClinVar Accession	ClinVar Conditions	LOVD-Protein	TCGA count	TCGA study	TCGA existing variation	CNA in TCGA	gnomAD rsIDs	gnomAD Allele Frequency	Frequency in gnomAD
23	G	48466723	G>A	p.G23D	Cancer	TCGA	11	G	100	Yes	159				1	STAD		0
23	G	48466722	G>A	p.G23S	Cancer	TCGA	11	G	100	Yes	159				1	TGCT		-1
23	G	48466723	G>T	p.G23V	Cancer	COSMIC	11	G	100	Yes	159
29	P	48466740	C>T	p.P29S	Autoimmune, cancer	TCGA, ClinVar	11	P	100	Yes	159	VCV001379862	AGS1; RVCL; CL1		1	BLCA		0
44	L	48466786	T>C	p.L44P	Cancer	TCGA	10	L	99.3711	Yes	159				2	LIHC		0
48	P	48466798	C>T	p.P48L	Autoimmune	ClinVar	4	P	68.5535	Yes	159	VCV001011726	CL1; RVCL; AGS1
48	S	48466796- 48466797; 48466797	delinsTTC>T	p.P48S	Autoimmune, cancer	TCGA, LOVD	4	P	68.5535	Yes	159			;p.(Pro48Ser)	1	GBM	rs754776272	0	rs754776272	6.57e-06	Low
87	L	48466915	T>C	p.L87P	Autoimmune, cancer	TCGA, ClinVar	11	L	100	Yes	159	VCV002062806	CL1; AGS1; RVCL		1	TGCT		1
99	C	48466950	T>C	p.C99R	Cancer	COSMIC	3	R	42.1384	No	158
99	C	48466951	G>A	p.C99Y	Autoimmune	ClinVar	3	R	42.1384	No	158	VCV001481619	AGS1; CL1; RVCL						rs778869156	4.6e-05	Low
101	D	48466956	G>C	p.D101H	Cancer	TCGA	8	D	91.8239	Yes	158				1	BLCA		-1
101	D	48466956	G>A	p.D101N	Cancer	TCGA	8	D	91.8239	Yes	158				1	BRCA		-1
164	R	48467146	G>A	p.R164Q	Autoimmune, cancer	TCGA, ClinVar	3	Q	46.5409	No	159	VCV001039525	CL1; RVCL; AGS1		1	BLCA	rs143885312	0	rs143885312	0.000124852	Low
164	P	48467146	G>C	p.R164P	Autoimmune	ClinVar	3	Q	46.5409	No	159	VCV001350863	CL1; RVCL; AGS1						rs143885312	1.97E-05	Low
175	K	48467180; 48467180	G>C; G>T	p.K175N	Cancer	TCGA	9	K	91.8239	Yes	159				1	BLCA;SKCM	.	-1; 0
210	W	48467283	T>C	p.W210R	Autoimmune, cancer	TCGA, ClinVar	11	W	100	Yes	159	VCV001359672	AGS1; CL1; RVCL		1	KIRC	rs770775387; COSM480210	-1	rs770775387	1.97e-05	Low
236	T	48467361	A>G	p.T236A	Cancer	TCGA	7	T	70.4403	Yes	157				1	HNSC	COSM3993122	0
236	T	48467361	A>T	p.T236S	Cancer	TCGA	7	T	70.4403	Yes	157				1	KIRP	COSM3993122	0
306	G	48467572	G>A	p.G306E	Cancer	TCGA	4	G	90.6	Yes	159				1	HNSC	CM074610; rs780022923	0
306	G	48467571	G>A	p.G306R	Autoimmune	ClinVar, LOVD	4	G	90.6	Yes	159	VCV000940759	AGS1; CL1; RVCL	p.(Gly306Arg)
