# Supplementary material for: Prevalence and impact of molecular variation in the three-prime repair exonuclease 1 TREX1 and its implications for oncology
Source: Hum Genomics. 2025 Jun 28;19:73. doi: 10.1186/s40246-025-00785-y (PMC12206365; doi:10.1186/s40246-025-00785-y)
Supplement: Supplementary file 14 — Additional file 14. Table S11. TREX1 protein sequence variant modeling results. [file 40246_2025_785_MOESM14_ESM.xlsx]

## Sheet: Table_S11
Table S11. TREX1 protein sequence variant modeling results
Results from different sources are integrated: AlphaMissense, FoldX, INPS-3D, COSMIC-3D, and Structural analysis of residue contacts with Chimera.
Variant	Position	WT	Mut	Disease	Database	AlphaMissense pathogenic probability score	AlphaMissense class	FoldX predicted ddG of unfolding (kcal/mol)	FoldX predicted ddG of folding (kcal/mol)	FoldX predicted effect	INPS-3D predicted ddG of folding (kcal/mol)	COSMIC 3D variant	COSMIC 3D position	Structural analysis of residue contacts (Chimera)	COSMIC 3D Mutation Impacts: Structural and functional impact hypotheses for this mutation	COSMIC 3D Combinatorial Impacts: Complex mutation impact interpretations based on multiple factors	COSMIC 3D Mutation Features
G23D	23	G	D	Cancer	TCGA	0.873	pathogenic	2.94449	-2.94449	highly destabilizing	-1.13433	G78D	78	Variant may hinder DNA binding	- Change from a glycine to a non-glycine amino acid. This may introduce rigidity into the protein and affect folding - Amino acid change results in a gain of negative charge - Changes from a hydrophobic amino acid to a polar amino acid - In a DNA binding site; could impact on DNA binding	- Causes a gain of negative charge in a DNA or RNA binding site: may be detrimental to binding to sugar-phosphate backbone
G23S	23	G	S	Cancer	TCGA	0.4072	ambiguous	4.20777	-4.20777	highly destabilizing	-0.871204	G78S	78	Variant may hinder DNA binding	NA	NA	NA
G23V	23	G	V	Cancer	COSMIC	0.904	pathogenic	5.38413	-5.38413	highly destabilizing	-1.36485	G78V	78	Variant may hinder DNA binding	- Change from a glycine to a non-glycine amino acid. This may introduce rigidity into the protein and affect folding - In a DNA binding site; could impact on DNA binding
P29S	29	P	S	Autoimmune, cancer	TCGA, ClinVar	0.8903	pathogenic	4.9665	-4.9665	highly destabilising	-0.527968	P84S	84		- Change from a proline to a non-proline amino acid. This may introduce flexibility into the protein and affect folding - Found to be buried (solvent inaccessible) in a protein structure; could impact on protein folding and/or function
L44P	44	L	P	Cancer	TCGA	0.7281	pathogenic	3.3455	-3.3455	highly destabilising	-1.69425	L99P	99		- Changes from a large amino acid to a small amino acid - Change from a non-proline to a proline amino acid. This may introduce rigidity into the protein and affect folding - Found to be buried (solvent inaccessible) in a protein structure; could impact on protein folding and/or function	- Changes from a large to a small amino acid in a solvent buried environment; may affect protein folding
P48L	48	P	L	Autoimmune	ClinVar	0.0755	benign	0.514059	-0.514059	slightly destabilising	0.383996	P103L	103		NA	NA	NA
P48S	48	P	S	Autoimmune, cancer	TCGA, LOVD	0.068	benign	0.982897	-0.982897	destabilising	-0.034378	P103S	103		- Change from a proline to a non-proline amino acid. This may introduce flexibility into the protein and affect folding
L87P	87	L	P	Autoimmune, cancer	TCGA, ClinVar	0.9563	pathogenic	6.77071	-6.77071	highly destabilising	-2.90869	L142P	142	Variant may hinder dimerization	NA	NA	NA
C99R	99	C	R	Cancer	COSMIC	0.0468	benign	-1.1587	1.1587	stabilising	-0.229481	C154R	154	Variant may hinder dimerization	- Changes from a small amino acid to a large amino acid - Amino acid change results in a gain of positive charge - Changes from a hydrophobic amino acid to a polar amino acid - In a protein-protein interaction site; could impact on the interaction	- Changes from a small to a large amino acid in a protein-protein interaction site: may alter interaction affinity
C99Y	99	C	Y	Autoimmune	ClinVar	0.0787	benign	-0.786211	0.786211	slightly stabilising	-0.151059	C154Y	154	Variant may hinder dimerization	NA	NA	NA
D101H	101	D	H	Cancer	TCGA	0.5537	ambiguous	4.79619	-4.79619	highly destabilising	-0.159999	D156H	156	Variant may hinder dimerization	- Changes from a small amino acid to a large amino acid - Amino acid change results in a loss of negative charge - Amino acid change results in a gain of positive charge - Changes from a negatively charged amino acid to a positively charged amino acid - In a protein-protein interaction site; could impact on the interaction	- Changes from a small to a large amino acid in a protein-protein interaction site: may alter interaction affinity
D101N	101	D	N	Cancer	TCGA	0.1057	benign	3.79528	-3.79528	highly destabilising	-0.4963	D156N	156		- Amino acid change results in a loss of negative charge - In a protein-protein interaction site; could impact on the interaction
R164P	164	R	P	Autoimmune	ClinVar	0.1348	benign	3.22603	-3.22603	highly destabilising	0.0531055	R219P	219	Variant may hinder DNA binding	NA	NA	NA
R164Q	164	R	Q	Autoimmune, cancer	TCGA, ClinVar	0.0649	benign	0.135308	-0.135308	neutral	-0.205992	R219Q	219	Variant may hinder DNA binding	- Amino acid change results in a loss of positive charge - In a DNA binding site; could impact on DNA binding	- Causes a loss of positive charge in a DNA or RNA binding site: may be detrimental to binding to sugar-phosphate backbone
K175N	175	K	N	Cancer	TCGA	0.5511	ambiguous	0.426052	-0.426052	neutral	-0.475247	K230N	230		- Changes from a large amino acid to a small amino acid - Amino acid change results in a loss of positive charge - Changes from a hydrophobic amino acid to a polar amino acid - In a DNA binding site; could impact on DNA binding	- Causes a loss of positive charge in a DNA or RNA binding site: may be detrimental to binding to sugar-phosphate backbone.	Mutagenesis Site: Reduces ubiquitination.
W210R	210	W	R	Autoimmune, cancer	TCGA, ClinVar	0.5795	pathogenic	1.8363	-1.8363	destabilising	-0.467537	W265R	265		- Amino acid change results in a gain of positive charge - Changes from a hydrophobic amino acid to a polar amino acid
T236A	236	T	A	Cancer	TCGA	0.0627	benign	NA	NA	NA	NA	T291A	291		- Changes from a polar amino acid to a hydrophobic amino acid.		Region of Interest: Necessary for endoplasmic reticulum localization
T236S	236	T	S	Cancer	TCGA	0.0889	benign	NA	NA	NA	NA	T291S	291		- Changes from a hydrophobic amino acid to a polar amino acid.		Region of Interest: Necessary for endoplasmic reticulum localization
G306E	306	G	E	Cancer	TCGA	0.2179	benign	NA	NA	NA	NA	G361E	361		- Changes from a small amino acid to a large amino acid - Change from a glycine to a non-glycine amino acid. This may introduce rigidity into the protein and affect folding - Amino acid change results in a gain of negative charge - Changes from a hydrophobic amino acid to a polar amino acid.		Region of Interest Necessary for endoplasmic reticulum localization. Region of Interest Interaction with UBQLN1. Region of Interest Necessary for cytoplasmic retention. Sequence Variant In SLE; dbSNP:rs780022923.
G306R	306	G	R	Autoimmune	ClinVar, LOVD	0.1847	benign	NA	NA	NA	NA	G361R	361		NA	NA	NA
