# Supplementary material for: Prevalence and impact of molecular variation in the three-prime repair exonuclease 1 TREX1 and its implications for oncology
Source: Hum Genomics. 2025 Jun 28;19:73. doi: 10.1186/s40246-025-00785-y (PMC12206365; doi:10.1186/s40246-025-00785-y)
Supplement: Supplementary file 15 — Additional file 15. Table S12. Frequency of the E266G (48467452 A>G) variant in different human populations in gnomAD. [file 40246_2025_785_MOESM15_ESM.xlsx]

## Sheet: Table S12
Table S12. Frequency of the E266G (48467452 A>G) variant in different human populations in gnomAD
Population	Counts of the G allele	Total allele number	Frequency of the G allele
East Asian	0	5196	0
Middle Eastern	0	316	0
Ashkenazi Jewish	1	3472	0.000288018
South Asian	2	4826	0.000414422
European (Finnish)	6	10612	0.000565398
African/African American	29	41438	0.000699841
Latino/Admixed American	15	15282	0.000981547
Amish	1	912	0.00109649
Other	4	2092	0.00191205
European (non-Finnish)	208	68014	0.00305819
Across populations	266	152160	0.00174816
