# Supplementary material for: Prevalence and impact of molecular variation in the three-prime repair exonuclease 1 TREX1 and its implications for oncology
Source: Hum Genomics. 2025 Jun 28;19:73. doi: 10.1186/s40246-025-00785-y (PMC12206365; doi:10.1186/s40246-025-00785-y)
Supplement: Supplementary file 16 — Additional file 16. Table S13. Distribution of different nucleotide sequence variant categories in TCGA cancer histologies. [file 40246_2025_785_MOESM16_ESM.xlsx]

## Sheet: Table_S13
Table S13. Distribution of different nucleotide sequence variant categories in TCGA cancer histologies
A. Variant type counts in TCGA studies
TCGA study	Primary Tissue	Total # samples	3_prime_UTR_variant	5_prime_UTR_variant	frameshift_variant	missense_variant	stop_gained	synonymous_variant	TOTAL N	% samples
BLCA	bladder	408	-	1	-	9	-	1	11	2.69608
SKCM	melanoma	367	-	2	-	4	1	3	10	2.7248
STAD	stomach	438	-	1	3	1	-	-	5	1.14155
HNSC	head_and_neck	517	-	-	1	3	-	-	4	0.773694
COADREAD	colorectal	592	1	1		1		1	4	0.675676
LUSC	lung_squamous_cell	487	1	-	-	2	-	-	3	0.616016
UCEC	endometrial	523	-	-	-	1	-	2	3	0.573614
PAAD	pancreas	183	-	-	-	-	1	1	2	1.0929
LIHC	liver	367	-	-	-	2	-	-	2	0.544959
TCGT	testicular	149	-	-	-	2	-	-	2	1.34228
KIRP	kidney_papillary_cell	283	-	1	-	1	-	-	2	0.706714
LGG	low_grade_glioma	511	-	-	1	1	-	-	2	0.391389
LUAD	lung_adenocarcinoma	511	-	1	-	1	-	-	2	0.391389
ESCA	esophagus	182	-	-	-	-	-	1	1	0.549451
BRCA	breast	1070	-	-	-	1	-	-	1	0.0934579
GBM	glioblastoma	575	-	-	-	1	-	-	1	0.173913
KIRC	kidney_clear_cell	509	-	-	-	1	-	-	1	0.196464
TOTAL	TOTAL	7672	2	7	5	31	2	9	56	0.729927
B. TCGA studies in which no TREX1 variants were reported
TCGA study	Primary Tissue	Total # samples	3_prime_UTR_variant	5_prime_UTR_variant	frameshift_variant	missense_variant	stop_gained	synonymous_variant	TOTAL N	%
ACC	adrenocortical_carcinoma	89	-	-	-	-	-	-	0	0
CESC	cervical_squamous_cell	293	-	-	-	-	-	-	0	0
CHOL	cholangiocarcinoma	36	-	-	-	-	-	-	0	0
DLBCL	diffuse_large_B_cell_lymphoma	48	-	-	-	-	-	-	0	0
KICH	kidney_chromophobe	65	-	-	-	-	-	-	0	0
LAML	acute_myeloid_leukemia	191	-	-	-	-	-	-	0	0
MESO	mesothelioma	87	-	-	-	-	-	-	0	0
OVCA	ovarian	572	-	-	-	-	-	-	0	0
PCPG	pheochromocytoma_and_paraganglioma	161	-	-	-	-	-	-	0	0
PRAD	prostate	489	-	-	-	-	-	-	0	0
SARC	sarcoma	253	-	-	-	-	-	-	0	0
THCA	thyroid	497	-	-	-	-	-	-	0	0
THYM	thymoma	123	-	-	-	-	-	-	0	0
UCS	uterine_carcinosarcoma	56	-	-	-	-	-	-	0	0
UVM	uveal_melanoma	80	-	-	-	-	-	-	0	0
TOTAL		3040	0	0	0	0	0	0	0	0
C. Proportions (%) of different variant categories in TCGA studies
TCGA study	Primary Tissue	Total # samples	3_prime_UTR_variant	5_prime_UTR_variant	frameshift_variant	missense_variant	stop_gained	synonymous_variant	TOTAL %
BLCA	bladder	408	-	0.245098	-	2.20588	-	0.245098	2.69608
SKCM	melanoma	367	-	0.544959	-	1.08992	0.27248	0.817439	2.7248
STAD	stomach	438	-	0.228311	0.684932	0.228311	-	-	1.14155
HNSC	head_and_neck	517	-	-	0.193424	0.580271	-	-	0.773694
COADREAD	colorectal	592	0.168919	0.168919		0.168919		0.168919	0.675676
LUSC	lung_squamous_cell	487	0.205339	-	-	0.410678	-	-	0.616016
UCEC	endometrial	523	-	-	-	0.191205	-	0.382409	0.573614
PAAD	pancreas	183	-	-	-	-	0.546448	0.546448	1.0929
LIHC	liver	367	-	-	-	0.544959	-	-	0.544959
TCGT	testicular	149	-	-	-	1.34228	-	-	1.34228
KIRP	kidney_papillary_cell	283	-	0.353357	-	0.353357	-	-	0.706714
LGG	low_grade_glioma	511	-	-	0.195695	0.195695	-	-	0.391389
LUAD	lung_adenocarcinoma	511	-	0.195695	-	0.195695	-	-	0.391389
ESCA	esophagus	182	-	-	-	-	-	0.549451	0.549451
BRCA	breast	1070	-	-	-	0.0934579	-	-	0.0934579
GBM	glioblastoma	575	-	-	-	0.173913	-	-	0.173913
KIRC	kidney_clear_cell	509	-	-	-	0.196464	-	-	0.196464
TOTAL	TOTAL	7672	0.0260688	0.0912409	0.0651721	0.404067	0.0260688	0.11731	0.729927
