# Supplementary material for: Prevalence and impact of molecular variation in the three-prime repair exonuclease 1 TREX1 and its implications for oncology
Source: Hum Genomics. 2025 Jun 28;19:73. doi: 10.1186/s40246-025-00785-y (PMC12206365; doi:10.1186/s40246-025-00785-y)
Supplement: Supplementary file 17 — Additional file 17. Table S14. Protein-level TCGA variants. [file 40246_2025_785_MOESM17_ESM.xlsx]

## Sheet: Table_S14
Table S14. Protein-level TCGA variants					24
HGVSp_Short and HGVSp, protein sequence positions of protein changes provided according to the TREX1a isoform, as reported by TCGA.
TREX1b_variants, protein sequence positions of protein changes provided according to the TREX1b isoform
HGVSc	HGVSp	HGVSp_Short	TREX1b_variants	TCGA_study	Primary_Tissue	Consequence	dbSNP_RS	Protein_position	Codons	CDS_position	Existing_variation	PolyPhen	SIFT	cDNA_position
ENST00000422277.2:c.20G>A	p.Arg7Lys	p.R7K		BLCA	bladder	missense_variant	rs760207170	7	aGa/aAa	20	rs760207170	unknown(0)	tolerated_low_confidence(1)	681
ENST00000422277.2:c.29G>C	p.Arg10Thr	p.R10T		BLCA	bladder	missense_variant	novel	10	aGg/aCg	29	.	unknown(0)	tolerated_low_confidence(0.11)	690
ENST00000422277.2:c.29G>C	p.Arg10Thr	p.R10T		HNSC	head_and_neck	missense_variant	novel	10	aGg/aCg	29	.	unknown(0)	tolerated_low_confidence(0.11)	690
ENST00000422277.2:c.67C>G	p.Pro23Ala	p.P23A		COADREAD	colorectal	missense_variant	rs371026419	23	Ccc/Gcc	67	rs371026419,COSM1423752	unknown(0)	tolerated_low_confidence(0.64)	728
ENST00000422277.2:c.79C>A	p.Leu27Ile	p.L27I		UCEC	endometrial	missense_variant	rs749371002	27	Ctc/Atc	79	rs749371002	unknown(0)	tolerated_low_confidence(0.4)	740
ENST00000422277.2:c.175C>T	p.Gln59Ter	p.Q59*	p.Q4*	PAAD	pancreas	stop_gained	novel	59	Cag/Tag	175	.	.	.	836
ENST00000422277.2:c.232G>A	p.Gly78Ser	p.G78S	p.G23S	TGCT	testicular	missense_variant	novel	78	Ggc/Agc	232	.	probably_damaging(1)	deleterious(0.02)	893
ENST00000422277.2:c.233G>A	p.Gly78Asp	p.G78D	p.G23D	STAD	stomach	missense_variant	novel	78	gGc/gAc	233	.	probably_damaging(1)	deleterious(0.03)	894
ENST00000422277.2:c.250C>T	p.Pro84Ser	p.P84S	p.P29S	BLCA	bladder	missense_variant	rs1407557314	84	Ccc/Tcc	250	.	probably_damaging(1)	deleterious(0.02)	911
ENST00000422277.2:c.296T>C	p.Leu99Pro	p.L99P	p.L44P	LIHC	liver	missense_variant	novel	99	cTg/cCg	296	.	probably_damaging(1)	deleterious(0)	957
ENST00000422277.2:c.296T>C	p.Leu99Pro	p.L99P	p.L44P	LIHC	liver	missense_variant	novel	99	cTg/cCg	296	.	probably_damaging(1)	deleterious(0)	957
ENST00000422277.2:c.309del	p.Thr104ProfsTer16	p.T104Pfs*16	p.T49Pfs*16	STAD	stomach	frameshift_variant	rs748914604	101	agC/ag	303	.	.	.	964
ENST00000422277.2:c.307C>T	p.Pro103Ser	p.P103S	p.P48S	GBM	glioblastoma	missense_variant	rs754776272	103	Ccc/Tcc	307	rs754776272	benign(0.006)	tolerated(0.5)	968
ENST00000422277.2:c.367T>G	p.Ser123Ala	p.S123A	p.S68A	BLCA	bladder	missense_variant	novel	123	Tcc/Gcc	367	.	possibly_damaging(0.875)	tolerated(0.09)	1028
ENST00000422277.2:c.425T>C	p.Leu142Pro	p.L142P	p.L87P	TGCT	testicular	missense_variant	novel	142	cTg/cCg	425	.	probably_damaging(1)	deleterious(0)	1086
ENST00000422277.2:c.451G>T	p.Gly151Trp	p.G151W	p.G96W	LUSC	lung_squamous_cell	missense_variant	novel	151	Ggg/Tgg	451	.	probably_damaging(0.995)	deleterious(0.04)	1112
ENST00000422277.2:c.466G>A	p.Asp156Asn	p.D156N	p.D101N	BRCA	breast	missense_variant	novel	156	Gat/Aat	466	.	benign(0.013)	tolerated(0.29)	1127
ENST00000422277.2:c.466G>C	p.Asp156His	p.D156H	p.D101H	BLCA	bladder	missense_variant	novel	156	Gat/Cat	466	.	possibly_damaging(0.893)	deleterious(0)	1127
ENST00000422277.2:c.532G>C	p.Ala178Pro	p.A178P	p.A123P	BLCA	bladder	missense_variant	novel	178	Gca/Cca	532	.	probably_damaging(0.994)	deleterious(0)	1193
ENST00000422277.2:c.562del	p.Leu188CysfsTer27	p.L188Cfs*27	p.L133Cfs*27	STAD	stomach	frameshift_variant	rs78762691	186	ttC/tt	558	rs749667732	.	.	1219
ENST00000422277.2:c.629G>C	p.Ser210Thr	p.S210T	p.S155T	LUAD	lung_adenocarcinoma	missense_variant	.	210	aGc/aCc	629	COSM583899	possibly_damaging(0.465)	tolerated(0.32)	1290
ENST00000422277.2:c.656G>A	p.Arg219Gln	p.R219Q	p.R164Q	BLCA	bladder	missense_variant	rs143885312	219	cGa/cAa	656	rs143885312	benign(0.003)	tolerated(0.83)	1317
ENST00000422277.2:c.690G>C	p.Lys230Asn	p.K230N	p.K175N	BLCA	bladder	missense_variant	novel	230	aaG/aaC	690	.	possibly_damaging(0.662)	tolerated(0.08)	1351
ENST00000422277.2:c.690G>T	p.Lys230Asn	p.K230N	p.K175N	SKCM	melanoma	missense_variant	novel	230	aaG/aaT	690	.	possibly_damaging(0.662)	tolerated(0.08)	1351
ENST00000422277.2:c.736C>A	p.Pro246Thr	p.P246T	p.P191T	SKCM	melanoma	missense_variant	rs750738235	246	Cct/Act	736	rs750738235	possibly_damaging(0.873)	deleterious(0.02)	1397
ENST00000422277.2:c.793T>C	p.Trp265Arg	p.W265R	p.W210R	KIRC	kidney_clear_cell	missense_variant	rs770775387	265	Tgg/Cgg	793	rs770775387,COSM480210	probably_damaging(0.989)	tolerated(0.2)	1454
ENST00000422277.2:c.818G>T	p.Trp273Leu	p.W273L	p.W218L	SKCM	melanoma	missense_variant	novel	273	tGg/tTg	818	.	probably_damaging(1)	deleterious(0)	1479
ENST00000422277.2:c.871A>G	p.Thr291Ala	p.T291A	p.T236A	HNSC	head_and_neck	missense_variant	.	291	Aca/Gca	871	COSM3993122	benign(0.011)	tolerated_low_confidence(0.16)	1532
ENST00000422277.2:c.871A>T	p.Thr291Ser	p.T291S	p.T236S	KIRP	kidney_papillary_cell	missense_variant	.	291	Aca/Tca	871	COSM3993122	benign(0.121)	tolerated_low_confidence(0.06)	1532
ENST00000422277.2:c.1004G>T	p.Gly335Val	p.G335V	p.G280V	BLCA	bladder	missense_variant	novel	335	gGa/gTa	1004	.	possibly_damaging(0.56)	deleterious_low_confidence(0.04)	1665
ENST00000422277.2:c.1031C>T	p.Ala344Val	p.A344V	p.A289V	LGG	low_grade_glioma	missense_variant	rs770518906	344	gCc/gTc	1031	rs770518906	benign(0.119)	deleterious_low_confidence(0.04)	1692
ENST00000422277.2:c.1067T>C	p.Val356Ala	p.V356A	p.V301A	LUSC	lung_squamous_cell	missense_variant	novel	356	gTa/gCa	1067	.	benign(0.229)	deleterious_low_confidence(0)	1728
ENST00000422277.2:c.1081G>T	p.Gly361Ter	p.G361*	p.G306*	SKCM	melanoma	stop_gained	novel	361	Gga/Tga	1081	.	.	.	1742
ENST00000422277.2:c.1082G>A	p.Gly361Glu	p.G361E	p.G306E	HNSC	head_and_neck	missense_variant	rs780022923	361	gGa/gAa	1082	CM074610,rs780022923	benign(0.096)	deleterious_low_confidence(0.05)	1743
ENST00000422277.2:c.1100C>T	p.Pro367Leu	p.P367L	p.P312L	SKCM	melanoma	missense_variant	rs772805032	367	cCt/cTt	1100	rs772805032,COSM3594916	possibly_damaging(0.856)	deleterious_low_confidence(0)	1761
ENST00000422277.2:c.377_378del	p.Val126GlyfsTer30	p.V126Gfs*30	p.V71Gfs*30	LGG	low_grade_glioma	frameshift_variant	rs74689946	124	cTG/c	371-372	.	.	.	1032-1033
ENST00000422277.2:c.103_104del	p.Leu35GlyfsTer121	p.L35Gfs*121		HNSC	head_and_neck	frameshift_variant	novel	35	CTg/g	103-104	.	.	.	764-765
ENST00000422277.2:c.309dup	p.Thr104HisfsTer53	p.T104Hfs*53	p.T49Hfs*53	STAD	stomach	frameshift_variant	rs748914604	101	agc/agCc	302-303	rs748914604	.	.	963-964
