# Supplementary material for: Prevalence and impact of molecular variation in the three-prime repair exonuclease 1 TREX1 and its implications for oncology
Source: Hum Genomics. 2025 Jun 28;19:73. doi: 10.1186/s40246-025-00785-y (PMC12206365; doi:10.1186/s40246-025-00785-y)
Supplement: Supplementary file 18 — Additional file 18. Table S15. Copy number status of TREX1 and chromosome 3p in 32 TCGA cancer histologies. [file 40246_2025_785_MOESM18_ESM.xlsx]

## Sheet: Table_S15
Table S15. Copy number status of TREX1 and chromosome 3p in 32 TCGA cancer histologies
The data were downloaded from cBioPortal.
Study Abbreviation	Study Name	Total n of samples with TREX1 CNA data	N samples with unknown 3p status	N samples with TREX1 CNA and 3p status data	N samples with TREX1 gain and 3p gain	Total n samples with TREX1 gain	% TREX1 gain with 3p gain	N samples with TREX1 loss and 3p loss	Total n samples with TREX1 loss	% TREX1 loss with 3p loss
ACC	Adrenocortical carcinoma	89	3	86	4	10	0.4	17	20	0.85
BLCA	Bladder Urothelial Carcinoma	408	108	300	62	85	0.729412	45	60	0.75
BRCA	Breast invasive carcinoma	1070	252	818	31	78	0.397436	136	160	0.85
CESC	Cervical squamous cell carcinoma and endocervical adenocarcinoma	293	41	252	14	23	0.608696	96	99	0.969697
CHOL	Cholangiocarcinoma	36	7	29	1	1	1	23	23	1
COADREAD	Colorectal adenocarcinoma	592	46	546	26	57	0.45614	47	63	0.746032
DLBC	Lymphoid Neoplasm Diffuse Large B-cell Lymphoma	48	6	42	8	9	0.888889	3	7	0.428571
ESCA	Esophageal carcinoma	182	47	135	3	9	0.333333	83	88	0.943182
GBM	Glioblastoma multiforme	575	35	540	25	60	0.416667	16	36	0.444444
HNSC	Head and Neck squamous cell carcinoma	517	63	454	4	8	0.5	305	322	0.947205
KICH	Kidney Chromophobe	65	2	63	4	5	0.8	8	9	0.888889
KIRC	Kidney renal clear cell carcinoma	509	126	383	2	5	0.4	325	333	0.975976
KIRP	Kidney renal papillary cell carcinoma	283	8	275	62	70	0.885714	20	21	0.952381
LAML	Acute Myeloid Leukemia	191	68	123	1	1	1	3	5	0.6
LGG	Brain Lower Grade Glioma	511	36	475	0	6	0	18	29	0.62069
LIHC	Liver hepatocellular carcinoma	367	42	325	17	26	0.653846	29	45	0.644444
LUAD	Lung adenocarcinoma	511	62	449	13	24	0.541667	183	211	0.867299
LUSC	Lung squamous cell carcinoma	487	65	422	0	2	0	366	371	0.986523
MESO	Mesothelioma	87	38	49	4	7	0.571429	5	15	0.333333
OV	Ovarian serous cystadenocarcinoma	572	205	367	35	72	0.486111	72	97	0.742268
PAAD	Pancreatic adenocarcinoma	183	32	151	5	5	1	30	38	0.789474
PCPG	Pheochromocytoma and Paraganglioma	161	7	154	2	3	0.666667	52	57	0.912281
PRAD	Prostate adenocarcinoma	489	38	451	11	31	0.354839	6	13	0.461538
SARC	Sarcoma	253	54	199	22	35	0.628571	21	34	0.617647
SKCM	Skin Cutaneous Melanoma	367	57	310	37	53	0.698113	36	49	0.734694
STAD	Stomach adenocarcinoma	438	83	355	11	22	0.5	80	101	0.792079
TGCT	Testicular Germ Cell Tumors	149	20	129	8	24	0.333333	26	26	1
THCA	Thyroid carcinoma	497	38	459	0	0	NA	2	2	1
THYM	Thymoma	123	18	105	0	0	NA	12	15	0.8
UCEC	Uterine Corpus Endometrial Carcinoma	523	49	474	23	42	0.547619	35	44	0.795455
UCS	Uterine Carcinosarcoma	56	21	35	3	6	0.5	15	19	0.789474
UVM	Uveal Melanoma	80	2	78	0	1	0	39	42	0.928571
Total		10712	1679	9033	438	780	0.561538	2154	2454	0.877751
