# Supplementary material for: Prevalence and impact of molecular variation in the three-prime repair exonuclease 1 TREX1 and its implications for oncology
Source: Hum Genomics. 2025 Jun 28;19:73. doi: 10.1186/s40246-025-00785-y (PMC12206365; doi:10.1186/s40246-025-00785-y)
Supplement: Supplementary file 19 — Additional file 19. Table S16. Copy number status of TREX1 and chromosome 3q in 32 TCGA cancer histologies. [file 40246_2025_785_MOESM19_ESM.xlsx]

## Sheet: Table_S16
Table S16. Copy number status of TREX1 and chromosome 3q in 32 TCGA cancer histologies
The data were downloaded from cBioPortal.
Study Abbreviation	Study Name	Total n of samples with TREX1 CNA data	N samples with unknown 3q status	N samples with TREX1 CNA and 3q status data	N samples with TREX1 gain and 3q gain	Total n samples with TREX1 gain	% TREX1 gain with 3q gain	N samples with TREX1 loss and 3q loss	Total n samples with TREX1 loss	% TREX1 loss with 3q loss
ACC	Adrenocortical carcinoma	89	9	80	3	9	0.333333	11	18	0.611111
BLCA	Bladder Urothelial Carcinoma	408	71	337	55	92	0.597826	7	84	0.0833333
BRCA	Breast invasive carcinoma	1070	197	873	29	74	0.391892	35	239	0.146444
CESC	Cervical squamous cell carcinoma and endocervical adenocarcinoma	293	57	236	23	26	0.884615	2	99	0.020202
CHOL	Cholangiocarcinoma	36	5	31	1	1	1	4	25	0.16
COADREAD	Colorectal adenocarcinoma	592	36	556	27	57	0.473684	25	78	0.320513
DLBC	Lymphoid Neoplasm Diffuse Large B-cell Lymphoma	48	5	43	9	10	0.9	3	7	0.428571
ESCA	Esophageal carcinoma	182	65	117	4	9	0.444444	4	72	0.0555556
GBM	Glioblastoma multiforme	575	55	520	20	56	0.357143	11	49	0.22449
HNSC	Head and Neck squamous cell carcinoma	517	137	380	5	8	0.625	5	258	0.0193798
KICH	Kidney Chromophobe	65	5	60	0	2	0	7	9	0.777778
KIRC	Kidney renal clear cell carcinoma	509	104	405	2	5	0.4	49	357	0.137255
KIRP	Kidney renal papillary cell carcinoma	283	11	272	60	68	0.882353	8	21	0.380952
LAML	Acute Myeloid Leukemia	191	67	124	1	1	1	1	5	0.2
LGG	Brain Lower Grade Glioma	511	27	484	1	12	0.0833333	8	41	0.195122
LIHC	Liver hepatocellular carcinoma	367	42	325	18	35	0.514286	20	51	0.392157
LUAD	Lung adenocarcinoma	511	94	417	10	24	0.416667	70	192	0.364583
LUSC	Lung squamous cell carcinoma	487	137	350	1	2	0.5	0	305	0
MESO	Mesothelioma	87	9	78	4	6	0.666667	4	43	0.0930233
OV	Ovarian serous cystadenocarcinoma	572	193	379	63	73	0.863014	2	119	0.0168067
PAAD	Pancreatic adenocarcinoma	183	26	157	4	4	1	8	43	0.186047
PCPG	Pheochromocytoma and Paraganglioma	161	10	151	0	3	0	45	57	0.789474
PRAD	Prostate adenocarcinoma	489	64	425	10	28	0.357143	1	14	0.0714286
SARC	Sarcoma	253	46	207	10	32	0.3125	19	47	0.404255
SKCM	Skin Cutaneous Melanoma	367	39	328	26	51	0.509804	24	63	0.380952
STAD	Stomach adenocarcinoma	438	104	334	13	22	0.590909	23	106	0.216981
TGCT	Testicular Germ Cell Tumors	149	24	125	8	19	0.421053	16	29	0.551724
THCA	Thyroid carcinoma	497	34	463	1	3	0.333333	2	2	1
THYM	Thymoma	123	18	105	0	0	NA	5	14	0.357143
UCEC	Uterine Corpus Endometrial Carcinoma	523	76	447	27	45	0.6	3	36	0.0833333
UCS	Uterine Carcinosarcoma	56	14	42	5	7	0.714286	5	27	0.185185
UVM	Uveal Melanoma	80	2	78	0	1	0	40	42	0.952381
Total		10712	1783	8929	440	785	0.56051	467	2552	0.182994
