# Supplementary material for: Prevalence and impact of molecular variation in the three-prime repair exonuclease 1 TREX1 and its implications for oncology
Source: Hum Genomics. 2025 Jun 28;19:73. doi: 10.1186/s40246-025-00785-y (PMC12206365; doi:10.1186/s40246-025-00785-y)
Supplement: Supplementary file 20 — Additional file 20. Table S17. Human structural TREX1 variants listed in the dbVar database. [file 40246_2025_785_MOESM20_ESM.xlsx]

## Sheet: Table_S17
Table S17. Human structural TREX1 variants listed in the dbVar database
Variant Region ID	Type	Number of Variant Calls	Study ID	Organism	Clinical Assertion	Location	Genes in region
esv3033441	copy number variation	1	estd209	human		GRCh37 chr3: 48,497,839-48,497,840 , GRCh38.p12 chr3: 48,456,439-48,456,440	ATRIP, ATRIP-TREX1
esv3335772	copy number variation	1	estd59	human		NCBI36 chr3: 48,474,933-48,475,140 , GRCh37.p13 chr3: 48,499,929-48,500,136 , GRCh38.p12 chr3: 48,458,530-48,458,737	ATRIP, ATRIP-TREX1
esv2354969	copy number variation	1	estd194	human		NCBI36 chr3: 48,472,844-48,472,845 , GRCh37.p13 chr3: 48,497,840-48,497,841 , GRCh38.p12 chr3: 48,456,440-48,456,441	ATRIP, ATRIP-TREX1
esv1111964	copy number variation	1	estd22	human		NCBI36 chr3: 48,465,843-48,465,844 , GRCh37.p13 chr3: 48,490,839-48,490,840 , GRCh38.p12 chr3: 48,449,434-48,449,435	ATRIP-TREX1, ATRIP
esv1718905	copy number variation	1	estd22	human		NCBI36 chr3: 48,464,569-48,464,570 , GRCh37.p13 chr3: 48,489,565-48,489,566 , GRCh38.p12 chr3: 48,448,161-48,448,161	ATRIP, ATRIP-TREX1
nsv6715569	copy number variation	1	nstd229	human		GRCh38 chr3: 48,459,424-48,459,998 , GRCh37.p13 chr3: 48,500,823-48,501,397	ATRIP-TREX1, ATRIP
nsv5448165	copy number variation	1	nstd206	human		GRCh38 chr3: 48,459,424-48,459,999 , GRCh37.p13 chr3: 48,500,823-48,501,398	ATRIP, ATRIP-TREX1
nsv4076789	copy number variation	1	nstd166	human		GRCh37.p13 chr3: 48,500,823-48,501,398 , GRCh38.p12 chr3: 48,459,424-48,459,999	ATRIP-TREX1, ATRIP
nsv3132892	copy number variation	3	nstd151	human		GRCh37 chr3: 48,501,183-48,501,320 , GRCh38.p12 chr3: 48,459,784-48,459,921	ATRIP-TREX1, ATRIP
nsv4471667	mobile element insertion	1	nstd166	human		GRCh37.p13 chr3: 48,502,189-48,502,189 , GRCh38.p12 chr3: 48,460,790-48,460,790	ATRIP-TREX1, ATRIP
esv2334905	insertion	1	estd194	human		NCBI36 chr3: 48,478,080-48,478,080 , GRCh37.p13 chr3: 48,503,076-48,503,076 , GRCh38.p12 chr3: 48,461,677-48,461,677	ATRIP, ATRIP-TREX1
esv1469079	insertion	1	estd22	human		NCBI36 chr3: 48,469,299-48,469,299 , GRCh37.p13 chr3: 48,494,295-48,494,295 , GRCh38.p12 chr3: 48,452,895-48,452,895	ATRIP, ATRIP-TREX1
nsv6538524	inversion	1	nstd223	human		GRCh38 chr3: 48,455,506-48,456,301 , GRCh37.p13 chr3: 48,496,906-48,497,701	ATRIP, ATRIP-TREX1
nsv6554076	inversion	1	nstd223	human		GRCh38 chr3: 48,455,505-48,456,121 , GRCh37.p13 chr3: 48,496,905-48,497,521	ATRIP-TREX1, ATRIP
nsv6554483	inversion	1	nstd223	human		GRCh38 chr3: 48,455,514-48,455,927 , GRCh37.p13 chr3: 48,496,914-48,497,327	ATRIP, ATRIP-TREX1
nsv2166936	short tandem repeat	5	nstd128	human		GRCh37 chr3: 48,503,077-48,503,120 , GRCh38.p12 chr3: 48,461,678-48,461,721	ATRIP-TREX1, ATRIP
nsv2166934	short tandem repeat	1	nstd128	human		GRCh37 chr3: 48,499,254-48,499,283 , GRCh38.p12 chr3: 48,457,854-48,457,883	ATRIP, ATRIP-TREX1
nsv2166935	short tandem repeat	4	nstd128	human		GRCh37 chr3: 48,499,710-48,499,736 , GRCh38.p12 chr3: 48,458,310-48,458,337	ATRIP-TREX1, ATRIP
nsv2170000	short tandem repeat	4	nstd128	human		GRCh37 chr3: 48,491,344-48,491,365 , GRCh38.p12 chr3: 48,449,938-48,449,959	ATRIP-TREX1, ATRIP
nsv2168331	short tandem repeat	3	nstd128	human		GRCh37 chr3: 48,496,260-48,496,280 , GRCh38.p12 chr3: 48,454,860-48,454,880	ATRIP-TREX1, ATRIP
nsv2170002	short tandem repeat	1	nstd128	human		GRCh37 chr3: 48,497,057-48,497,076 , GRCh38.p12 chr3: 48,455,657-48,455,676	ATRIP, ATRIP-TREX1
nsv2170001	short tandem repeat	1	nstd128	human		GRCh37 chr3: 48,495,317-48,495,331 , GRCh38.p12 chr3: 48,453,917-48,453,931	ATRIP-TREX1, ATRIP
nsv2168332	short tandem repeat	2	nstd128	human		GRCh37 chr3: 48,497,681-48,497,695 , GRCh38.p12 chr3: 48,456,281-48,456,295	ATRIP-TREX1, ATRIP
nsv2168333	short tandem repeat	3	nstd128	human		GRCh37 chr3: 48,503,567-48,503,579 , GRCh38.p12 chr3: 48,462,168-48,462,180	ATRIP, ATRIP-TREX1
nsv2168330	short tandem repeat	2	nstd128	human		GRCh37 chr3: 48,492,596-48,492,606 , GRCh38.p12 chr3: 48,451,190-48,451,200	ATRIP, ATRIP-TREX1
nsv2166937	short tandem repeat	2	nstd128	human		GRCh37 chr3: 48,504,102-48,504,112 , GRCh38.p12 chr3: 48,462,703-48,462,713	ATRIP, ATRIP-TREX1
nsv1398572	copy number variation	1	nstd102	human	Uncertain significance	GRCh37 chr3: 48,501,854-48,541,490 , GRCh38.p12 chr3: 48,460,455-48,504,057	TREX1, ATRIP-TREX1, 2 more genes
nsv6314388	delins	1	nstd102	human	Uncertain significance	GRCh37 chr3: 48,508,912-48,508,921 , GRCh38 chr3: 48,467,513-48,467,522	TREX1, SHISA5, 2 more genes
nsv3124167	copy number variation	1	nstd151	human		GRCh37 chr3: 48,491,440-48,506,066 , GRCh38.p12 chr3: 48,450,034-48,464,667	TREX1, ATRIP, 1 more genes
nsv936637	copy number variation	1	nstd84	human		GRCh37 chr3: 48,507,120-48,514,808 , GRCh38.p12 chr3: 48,465,721-48,473,399	TREX1, SHISA5, 2 more genes
nsv590243	copy number variation	1	nstd54	human		NCBI36 chr3: 48,480,835-48,494,825 , GRCh37.p13 chr3: 48,505,831-48,519,821 , GRCh38.p12 chr3: 48,464,432-48,478,412	TREX1, SHISA5, 2 more genes
nsv590244	copy number variation	1	nstd54	human		NCBI36 chr3: 48,480,928-48,494,825 , GRCh37.p13 chr3: 48,505,924-48,519,821 , GRCh38.p12 chr3: 48,464,525-48,478,412	TREX1, ATRIP-TREX1, 2 more genes
nsv590245	copy number variation	1	nstd54	human		NCBI36 chr3: 48,481,226-48,494,825 , GRCh37.p13 chr3: 48,506,222-48,519,821 , GRCh38.p12 chr3: 48,464,823-48,478,412	TREX1, SHISA5, 2 more genes
esv3785271	copy number variation	1	estd192	human		GRCh37 chr3: 48,488,455-48,488,530 , GRCh38.p12 chr3: 48,447,051-48,447,126	CCDC51, ATRIP, 1 more genes
nsv6717287	copy number variation	1	nstd229	human		GRCh38 chr3: 48,451,472-48,466,983 , GRCh37.p13 chr3: 48,492,878-48,508,382	TREX1, ATRIP, 2 more genes
esv1802114	copy number variation	1	estd188	human		NCBI36 chr3: 48,473,826-48,552,674 , GRCh37.p13 chr3: 48,498,822-48,577,670 , GRCh38.p12 chr3: 48,457,422-48,540,237	TREX1, ATRIP-TREX1, 3 more genes
esv3204779	insertion	1	estd209	human		GRCh37 chr3: 48,486,591-48,486,591 , GRCh38.p12 chr3: 48,445,183-48,445,183	CCDC51, ATRIP, 1 more genes
esv1753750	insertion	1	estd22	human		NCBI36 chr3: 48,461,597-48,461,597 , GRCh37.p13 chr3: 48,486,593-48,486,593 , GRCh38.p12 chr3: 48,445,189-48,445,189	CCDC51, ATRIP, 1 more genes
nsv2170003	short tandem repeat	2	nstd128	human		GRCh37 chr3: 48,507,685-48,507,704 , GRCh38.p12 chr3: 48,466,286-48,466,305	TREX1, SHISA5, 2 more genes
nsv2166933	short tandem repeat	2	nstd128	human		GRCh37 chr3: 48,486,582-48,486,593 , GRCh38.p12 chr3: 48,445,174-48,445,189	CCDC51, ATRIP-TREX1, 1 more genes
nsv6315166	copy number variation	1	nstd102	human	Pathogenic	GRCh37 chr3: 44,948,482-49,115,809 , GRCh38.p12 chr3: 44,906,990-49,078,376	TREX1, TMEM89, 129 more genes
nsv5673729	copy number variation	1	nstd102	human	Pathogenic	GRCh37 chr3: 48,507,870-50,340,407 , GRCh38.p12 chr3: 48,466,471-50,302,976	TREX1, SEMA3B-AS1, 87 more genes
nsv4674083	copy number variation	1	nstd102	human	Pathogenic	GRCh37 chr3: 48,346,677-49,630,228 , GRCh38.p12 chr3: 48,305,187-49,592,795	TREX1, MIR6823, 59 more genes
nsv3885606	copy number variation	1	nstd102	human	Pathogenic	GRCh37 chr3: 60,174-197,948,027 , GRCh38.p12 chr3: 18,496-198,221,156	TREX1, RNU4-62P, 2880 more genes
nsv3889228	copy number variation	2	nstd102	human	Pathogenic	GRCh37 chr3: 61,892-197,851,986 , GRCh38.p12 chr3: 20,214-198,125,115	TREX1, NDUFB4, 2876 more genes
nsv3880617	copy number variation	1	nstd102	human	Pathogenic	GRCh37 chr3: 61,495-197,838,262 , GRCh38.p12 chr3: 19,817-198,111,391	TREX1, RPL23AP49, 2875 more genes
nsv4347762	copy number variation	1	nstd102	human	Pathogenic	GRCh37 chr3: 45,153,770-53,878,616 , GRCh38.p12 chr3: 45,112,278-53,844,589	TREX1, UQCRC1, 291 more genes
nsv3921797	copy number variation	1	nstd102	human	Pathogenic	NCBI36 chr3: 45,896,379-50,762,357 , GRCh38 chr3: 45,879,883-50,749,922 , GRCh37 chr3: 45,921,375-50,787,353	TREX1, RBM5-AS1, 185 more genes
nsv3883164	copy number variation	1	nstd102	human	Likely pathogenic	GRCh37 chr3: 37,028,313-49,929,220 , GRCh38.p12 chr3: 36,986,822-49,891,787	TREX1, ACAA1, 344 more genes
nsv3879581	copy number variation	1	nstd102	human	Benign	GRCh37 chr3: 48,505,831-48,641,197 , GRCh38.p12 chr3: 48,464,432-48,603,764	TREX1, SNORA94, 9 more genes
nsv3876948	copy number variation	1	nstd102	human	Uncertain significance	GRCh37 chr3: 48,441,331-48,516,124 , GRCh38.p12 chr3: 48,399,862-48,474,715	TREX1, SHISA5, 5 more genes
nsv429644	copy number variation	1	nstd11	human		GRCh37.p13 chr3: 35,009,045-84,383,151 , GRCh38.p12 chr3: 34,967,553-84,334,000 , NCBI36 chr3: 34,984,049-84,465,841	TREX1, ACAA1, 823 more genes
nsv7096805	copy number variation	1	nstd102	human	Uncertain significance	GRCh37 chr3: 45,435,946-49,137,751 , GRCh38.p12 chr3: 45,394,454-49,100,318	TREX1, SNORA94, 120 more genes
nsv984837	copy number variation	2	nstd11	human		GRCh37.p13 chr3: 60,345-197,896,118 , GRCh38.p12 chr3: 18,667-198,169,247 , NCBI36 chr3: 35,345-199,380,515	TREX1, AADAC, 2982 more genes
nsv876761	copy number variation	1	nstd71	human		NCBI36 chr3: 48,439,972-48,471,762 , GRCh37.p13 chr3: 48,464,968-48,496,758 , GRCh38.p12 chr3: 48,423,559-48,455,358	CCDC51, ATRIP, 4 more genes
nsv6700836	copy number variation	1	nstd229	human		GRCh38 chr3: 48,056,801-51,204,000 , GRCh37.p13 chr3: 48,098,291-51,241,431	TREX1, APEH, 129 more genes
nsv6134694	copy number variation	1	nstd213	human		GRCh37 chr3: 46,170,000-52,140,001 , GRCh38.p12 chr3: 46,128,508-52,105,985	TREX1, ACY1, 210 more genes
nsv4596497	copy number variation	1	nstd183	human		GRCh37 chr3: 48,429,812-48,556,862 , GRCh38.p12 chr3: 48,388,324-48,519,429	TREX1, ATRIP, 8 more genes
nsv4588750	copy number variation	1	nstd183	human		GRCh37 chr3: 48,430,523-48,555,082 , GRCh38.p12 chr3: 48,389,035-48,517,649	TREX1, ATRIP, 8 more genes
nsv2782823	copy number variation	1	nstd132	human		NCBI36 chr3: 48,448,208-49,371,755 , GRCh37.p13 chr3: 48,473,204-49,396,751 , GRCh38.p12 chr3: 48,431,794-49,359,318	TREX1, SLC25A20, 49 more genes
nsv3134329	copy number variation	1	nstd151	human		GRCh37 chr3: 48,414,255-48,573,901 , GRCh38.p12 chr3: 48,372,765-48,536,468	TREX1, RN7SL321P, 9 more genes
nsv1319612	copy number variation	1	nstd122	human		NCBI36 chr3: 48,408,639-48,531,343 , GRCh37.p13 chr3: 48,433,635-48,556,339 , GRCh38.p12 chr3: 48,392,157-48,518,906	TREX1, FBXW12, 8 more genes
nsv1192677	copy number variation	1	nstd113	human		NCBI36 chr3: 48,069,784-50,165,587 , GRCh37.p13 chr3: 48,094,780-50,190,583 , GRCh38.p12 chr3: 48,053,290-50,153,150	TREX1, SLC25A20, 99 more genes
nsv1014081	copy number variation	1	nstd100	human		NCBI36 chr3: 48,069,784-50,165,587 , GRCh37.p13 chr3: 48,094,780-50,190,583 , GRCh38.p12 chr3: 48,053,290-50,153,150	TREX1, NICN1, 99 more genes
nsv1143267	copy number variation	1	nstd106	human		GRCh37 chr3: 74,872-75,298,539 , GRCh38.p12 chr3: 33,198-75,249,388	TREX1, TWF2, 1204 more genes
nsv536563	copy number variation	1	nstd54	human		NCBI36 chr3: 48,069,784-50,165,587 , GRCh37.p13 chr3: 48,094,780-50,190,583 , GRCh38.p12 chr3: 48,053,290-50,153,150	TREX1, MAP4, 99 more genes
nsv590242	copy number variation	1	nstd54	human		NCBI36 chr3: 48,408,639-48,531,343 , GRCh37.p13 chr3: 48,433,635-48,556,339 , GRCh38.p12 chr3: 48,392,157-48,518,906	TREX1, FBXW12, 8 more genes
esv3791123	copy number variation	1	estd192	human		GRCh37 chr3: 1,404,739-153,534,255 , GRCh38.p12 chr3: 1,363,055-153,816,466	TREX1, MIR1324, 2254 more genes
esv3788638	copy number variation	1	estd192	human		GRCh37 chr3: 31,412,156-168,115,854 , GRCh38.p12 chr3: 31,370,664-168,398,066	TREX1, LINC02070, 2041 more genes
esv3766774	copy number variation	1	estd192	human		GRCh37 chr3: 31,412,246-168,115,763 , GRCh38.p12 chr3: 31,370,754-168,397,975	TREX1, CMTM7, 2041 more genes
esv3797747	copy number variation	1	estd192	human		GRCh37 chr3: 25,121,696-115,526,404 , GRCh38.p12 chr3: 25,080,205-115,807,557	TREX1, RNU6-1129P, 1291 more genes
esv3791845	copy number variation	2	estd192	human		GRCh37 chr3: 13,100,821-86,746,378 , GRCh38.p12 chr3: 13,059,321-86,697,228	TREX1, EEF1GP3, 1105 more genes
esv3807299	copy number variation	1	estd192	human		GRCh37 chr3: 16,746,836-84,959,120 , GRCh38.p12 chr3: 16,705,329-84,909,969	TREX1, NEK10, 1022 more genes
esv3770723	copy number variation	1	estd192	human		GRCh37 chr3: 19,274,382-86,897,383 , GRCh38.p12 chr3: 19,232,890-86,848,233	TREX1, NFU1P1, 1012 more genes
esv3771548	copy number variation	1	estd192	human		GRCh37 chr3: 16,866,013-84,342,698 , GRCh38.p12 chr3: 16,884,818-84,293,547	TREX1, P4HTM, 1017 more genes
esv3772402	copy number variation	1	estd192	human		GRCh37 chr3: 32,073,951-98,559,214 , GRCh38.p12 chr3: 32,032,459-98,840,370	TREX1, RN7SL647P, 983 more genes
esv3797749	copy number variation	2	estd192	human		GRCh37 chr3: 32,073,963-98,559,217 , GRCh38.p12 chr3: 32,032,471-98,840,373	TREX1, LOC105377034, 983 more genes
esv3783499	copy number variation	1	estd192	human		GRCh37 chr3: 12,414,083-73,939,995 , GRCh38.p12 chr3: 12,372,584-73,890,844	TREX1, LOC105377000, 1031 more genes
esv3773704	copy number variation	1	estd192	human		GRCh37 chr3: 15,809,604-72,068,544 , GRCh38.p12 chr3: 15,768,097-72,019,393	TREX1, LOC107986019, 918 more genes
esv3786325	copy number variation	1	estd192	human		GRCh37 chr3: 29,669,530-83,596,456 , GRCh38.p12 chr3: 29,628,039-83,547,305	TREX1, NDUFAF4P3, 885 more genes
esv3761658	copy number variation	2	estd192	human		GRCh37 chr3: 34,849,517-88,001,400 , GRCh38.p12 chr3: 34,808,025-87,952,250	TREX1, OSBPL9P1, 853 more genes
esv3814048	copy number variation	2	estd192	human		GRCh37 chr3: 4,366,034-52,088,808 , GRCh38.p12 chr3: 4,324,350-52,054,792	TREX1, ITPR1, 855 more genes
esv3778725	copy number variation	1	estd192	human		GRCh37 chr3: 25,423,797-69,807,505 , GRCh38.p12 chr3: 25,382,306-69,758,354	TREX1, LOC105377113, 805 more genes
esv3781050	copy number variation	1	estd192	human		GRCh37 chr3: 40,531,704-84,772,111 , GRCh38.p12 chr3: 40,490,213-84,722,960	TREX1, MIR5787, 722 more genes
esv3776567	copy number variation	1	estd192	human		GRCh37 chr3: 37,690,961-73,323,054 , GRCh38.p12 chr3: 37,649,470-73,273,903	TREX1, GPX1, 702 more genes
esv3811989	copy number variation	1	estd192	human		GRCh37 chr3: 43,245,508-76,637,214 , GRCh38.p12 chr3: 43,204,016-76,588,063	TREX1, DENND6A, 627 more genes
esv3806481	copy number variation	1	estd192	human		GRCh37 chr3: 41,943,725-73,577,435 , GRCh38.p12 chr3: 41,902,233-73,528,284	TREX1, PPP4R2, 620 more genes
esv3772856	copy number variation	1	estd192	human		GRCh37 chr3: 44,583,032-70,238,440 , GRCh38.p12 chr3: 44,541,540-70,189,289	TREX1, DAG1, 513 more genes
esv3756008	copy number variation	1	estd192	human		GRCh37 chr3: 42,780,097-67,622,827 , GRCh38.p12 chr3: 42,738,605-67,572,403	TREX1, FHIT, 526 more genes
esv3811720	copy number variation	1	estd192	human		GRCh37 chr3: 42,831,550-66,481,273 , GRCh38.p12 chr3: 42,790,058-66,430,849	TREX1, LOC107986082, 512 more genes
esv3777287	copy number variation	1	estd192	human		GRCh37 chr3: 44,535,985-65,794,269 , GRCh38.p12 chr3: 44,494,493-65,808,594	TREX1, CABYRP1, 470 more genes
esv3770355	copy number variation	1	estd192	human		GRCh37 chr3: 45,741,653-66,957,800 , GRCh38.p12 chr3: 45,700,161-66,907,376	TREX1, LINC02017, 446 more genes
esv3766498	copy number variation	1	estd192	human		GRCh37 chr3: 44,546,537-64,605,974 , GRCh38.p12 chr3: 44,505,045-64,620,298	TREX1, PTH1R, 460 more genes
esv3764865	copy number variation	1	estd192	human		GRCh37 chr3: 42,403,681-62,280,458 , GRCh38.p12 chr3: 42,362,189-62,294,783	TREX1, PPIAP16, 470 more genes
esv3761676	copy number variation	1	estd192	human		GRCh37 chr3: 47,484,293-66,845,141 , GRCh38.p12 chr3: 47,442,803-66,794,717	TREX1, DUSP7, 396 more genes
esv3773268	copy number variation	2	estd192	human		GRCh37 chr3: 39,505,691-58,288,199 , GRCh38.p12 chr3: 39,464,200-58,302,472	TREX1, GRM2, 472 more genes
esv3798835	copy number variation	1	estd192	human		GRCh37 chr3: 37,998,458-55,228,608 , GRCh38.p12 chr3: 37,956,967-55,194,580	TREX1, BOLA2P2, 478 more genes
esv3797157	copy number variation	1	estd192	human		GRCh37 chr3: 40,810,294-57,691,888 , GRCh38.p12 chr3: 40,768,803-57,706,161	TREX1, MIR711, 440 more genes
esv3790007	copy number variation	1	estd192	human		GRCh37 chr3: 44,145,123-59,661,723 , GRCh38.p12 chr3: 44,103,631-59,675,997	TREX1, ZMYND10, 411 more genes
esv3781572	copy number variation	1	estd192	human		GRCh37 chr3: 44,425,922-53,225,877 , GRCh38.p12 chr3: 44,384,430-53,191,861	TREX1, ZDHHC3, 323 more genes
esv3797645	copy number variation	1	estd192	human		GRCh37 chr3: 46,302,415-54,555,785 , GRCh38.p12 chr3: 46,260,924-54,521,758	TREX1, CSPG5, 276 more genes
esv3776966	copy number variation	1	estd192	human		GRCh37 chr3: 47,251,445-51,268,284 , GRCh38.p12 chr3: 47,209,955-51,230,853	TREX1, DALRD3, 152 more genes
esv3776093	copy number variation	1	estd192	human		GRCh37 chr3: 48,356,406-49,169,373 , GRCh38.p12 chr3: 48,314,916-49,131,940	TREX1, MIR2115, 43 more genes
esv2755378	copy number variation	1	estd55	human		NCBI35 chr3: 109,991-83,520,768 , GRCh37.p13 chr3: 134,991-83,438,078 , GRCh38.p12 chr3: 93,308-83,388,927	TREX1, ACY1, 1263 more genes
nsv6712813	copy number variation	1	nstd229	human		GRCh38 chr3: 48,419,498-48,534,372 , GRCh37.p13 chr3: 48,460,907-48,571,805	TREX1, SHISA5, 6 more genes
nsv6364784	copy number variation	1	nstd223	human		GRCh38 chr3: 48,413,918-48,470,639 , GRCh37.p13 chr3: 48,455,327-48,512,038	TREX1, PLXNB1, 5 more genes
nsv3135602	copy number variation	1	nstd151	human		GRCh37 chr3: 48,455,301-48,511,247 , GRCh38.p12 chr3: 48,413,892-48,469,848	TREX1, ATRIP, 6 more genes
nsv6709380	copy number variation	1	nstd229	human		GRCh38 chr3: 47,729,831-48,514,976 , GRCh37.p13 chr3: 47,771,321-48,552,409	TREX1, ATRIP-TREX1, 26 more genes
nsv6698688	copy number variation	1	nstd229	human		GRCh38 chr3: 48,100,012-48,509,466 , GRCh37.p13 chr3: 48,141,502-48,546,899	TREX1, MIR4443, 20 more genes
nsv6372055	copy number variation	1	nstd223	human		GRCh38 chr3: 48,386,801-49,230,000 , GRCh37.p13 chr3: 48,428,291-49,267,433	TREX1, NCKIPSD, 44 more genes
nsv6365306	copy number variation	1	nstd223	human		GRCh38 chr3: 48,429,601-48,926,800 , GRCh37.p13 chr3: 48,471,010-48,964,233	TREX1, PRKAR2A-AS1, 25 more genes
nsv3168877	copy number variation	1	nstd158	human		GRCh37 chr3: 38,483,456-71,473,806 , GRCh38.p12 chr3: 38,441,965-71,424,655	TREX1, ACVR2B, 646 more genes
esv3323803	copy number variation	1	estd59	human		NCBI36 chr3: 23,705,741-121,059,389 , GRCh37.p13 chr3: 23,730,737-119,576,699 , GRCh38.p12 chr3: 23,689,246-119,857,852	TREX1, LINC00698, 1362 more genes
esv3369810	copy number variation	1	estd59	human		NCBI36 chr3: 92,774-75,780,040 , GRCh37.p13 chr3: 117,774-75,697,350 , GRCh38.p12 chr3: 76,091-75,648,199	TREX1, ZNF385D, 1221 more genes
esv3804203	tandem duplication	1	estd192	human		GRCh37 chr3: 31,406,152-191,012,564 , GRCh38.p12 chr3: 31,364,660-191,294,775	TREX1, NIFKP7, 2404 more genes
esv3801264	tandem duplication	1	estd192	human		GRCh37 chr3: 16,862,682-94,316,421 , GRCh38.p12 chr3: 16,884,818-94,597,577	TREX1, ATRIP, 1077 more genes
esv3805642	tandem duplication	3	estd192	human		GRCh37 chr3: 32,073,965-98,568,478 , GRCh38.p12 chr3: 32,032,473-98,849,634	TREX1, RPL35AP8, 983 more genes
esv3764315	tandem duplication	1	estd192	human		GRCh37 chr3: 7,603,259-64,067,504 , GRCh38.p12 chr3: 7,561,572-64,081,828	TREX1, SHISA5, 1009 more genes
esv3759026	tandem duplication	1	estd192	human		GRCh37 chr3: 29,414,555-83,856,911 , GRCh38.p12 chr3: 29,373,064-83,807,760	TREX1, ZNF660, 887 more genes
esv3805924	tandem duplication	1	estd192	human		GRCh37 chr3: 8,144,899-58,551,475 , GRCh38.p12 chr3: 8,103,212-58,565,748	TREX1, RPEP2, 951 more genes
esv3785717	tandem duplication	1	estd192	human		GRCh37 chr3: 25,472,308-69,768,163 , GRCh38.p12 chr3: 25,430,817-69,719,012	TREX1, LOC102724048, 803 more genes
esv3794000	tandem duplication	1	estd192	human		GRCh37 chr3: 13,793,313-49,653,336 , GRCh38.p12 chr3: 13,751,816-49,615,903	TREX1, GASK1A, 614 more genes
esv3814945	tandem duplication	1	estd192	human		GRCh37 chr3: 34,908,715-63,463,093 , GRCh38.p12 chr3: 34,867,223-63,477,417	TREX1, PRKCD, 615 more genes
esv3800648	tandem duplication	2	estd192	human		GRCh37 chr3: 47,646,349-48,655,044 , GRCh38.p12 chr3: 47,604,859-48,617,611	TREX1, PLXNB1, 36 more genes
nsv508917	insertion	2	nstd49	human		GRCh37.p13 chr3: 48,441,693-48,536,791 , GRCh38.p12 chr3: 48,400,224-48,499,357 , NCBI35 chr3: 48,416,697-48,511,795	TREX1, PLXNB1, 6 more genes
nsv436872	insertion	1	nstd16	human		NCBI36 chr3: 37,081,233-127,605,240 , GRCh37.p13 chr3: 37,106,229-126,122,550 , GRCh38.p12 chr3: 37,064,738-126,403,707	TREX1, ACAA1, 1340 more genes
nsv436076	insertion	1	nstd16	human		NCBI36 chr3: 36,631-75,357,138 , GRCh37.p13 chr3: 61,631-75,274,448 , GRCh38.p12 chr3: 19,953-75,225,297	TREX1, ACAA1, 1205 more genes
nsv436871	insertion	1	nstd16	human		NCBI36 chr3: 38,586-75,355,061 , GRCh37.p13 chr3: 63,586-75,272,371 , GRCh38.p12 chr3: 21,908-75,223,220	TREX1, ACAA1, 1205 more genes
nsv5561912	sequence alteration	1	nstd206	human		GRCh38 chr3: 46,623,292-58,677,536 , GRCh37.p13 chr3: 46,664,782-58,663,263	TREX1, CDC25A, 327 more genes
nsv4877503	inversion	1	nstd200	human		GRCh37 chr3: 24,885,632-100,711,157 , GRCh38.p12 chr3: 24,844,141-100,992,313	TREX1, LINC00692, 1088 more genes
nsv5030280	inversion	1	nstd200	human		GRCh38 chr3: 3,432,416-77,775,308 , GRCh37.p13 chr3: 3,474,100-77,824,459	TREX1, BHLHE40, 1198 more genes
nsv4888770	inversion	1	nstd200	human		GRCh37 chr3: 3,474,100-77,824,459 , GRCh38.p12 chr3: 3,432,416-77,775,308	TREX1, ATRIP, 1198 more genes
nsv5037434	inversion	1	nstd200	human		GRCh38 chr3: 5,031,119-56,902,223 , GRCh37.p13 chr3: 5,072,804-56,936,251	TREX1, IRAK2, 925 more genes
nsv4564128	inversion	1	nstd166	human		GRCh37.p13 chr3: 3,474,047-77,824,459 , GRCh38.p12 chr3: 3,432,363-77,775,308	TREX1, ACY1, 1205 more genes
nsv2768229	copy-neutral loss of heterozygosity	1	nstd125	human		GRCh37 chr3: 39,873,604-53,004,620 , GRCh38.p12 chr3: 39,832,113-52,970,604	TREX1, ACY1, 400 more genes
nsv2768230	copy-neutral loss of heterozygosity	1	nstd125	human		GRCh37 chr3: 46,715,645-52,852,488 , GRCh38.p12 chr3: 46,674,155-52,818,472	TREX1, ACY1, 240 more genes
nsv1079040	inversion	1	nstd99	human		GRCh37 chr3: 31,400,759-115,024,402 , GRCh38.p12 chr3: 31,359,267-115,305,555	TREX1, ACAA1, 1218 more genes
nsv834684	copy number variation	1	nstd68	human		NCBI35 chr3: 48,360,703-48,564,327 , GRCh37.p13 chr3: 48,385,699-48,589,323 , GRCh38.p12 chr3: 48,344,209-48,551,890	TREX1, PFKFB4, 10 more genes
nsv834683	copy number variation	2	nstd68	human		NCBI35 chr3: 48,276,508-48,468,265 , GRCh37.p13 chr3: 48,301,504-48,493,261 , GRCh38.p12 chr3: 48,260,014-48,451,855	PLXNB1, NME6, 11 more genes
